# Supplementary material
Source: publisher figshare collection journal article supplement (https://gsapubs.figshare.com/ndownloader/files/23309729)
Supplement: Supplementary file 2 [file 23309729]

Archive with 2 entries (2 files):
- 541-23_DRTables.xlsx
- 541-23_DRMethods.pdf
