# Supplementary material
Source: publisher figshare collection journal article supplement (https://gsapubs.figshare.com/ndownloader/files/23309729)
Supplement: Supplementary file 2 [file 23309729 › 541-23_DRTables.xlsx]

## Sheet: Table DR1
Strauss, J.V., Johnson, B.G., Colpron, M., Nelson, L.L., Perez, J.L., Benowitz, J.A., Ward, W.P., and McClelland, W.C., 2018, Pre-Mississippian stratigraphy and provenance of the North Slope of Arctic Alaska II: Basinal rocks of the northeastern Brooks Range and their significance in circum-Arctic evolution, in Piepjohn, K., Strauss, J.V., Reinhardt, L., and McClelland, W.C., eds., Circum-Arctic …
GSA Data Repository Item 2018273
Table DR1. Carbonate carbon and oxygen isotopic data from the Firth River Group, British Mountains, Brooks Range, Alaska.
Unit	Section	Stratigraphic Height	δ13C	δ18O
Sheep Creek Formation	J1333	0.2	8.77833	-11.2945
Sheep Creek Formation	J1333	0.7	8.59033	-11.6785
Sheep Creek Formation	J1333	5.2	9.01633	-8.5803
Sheep Creek Formation	J1333	7.4	8.64133	-8.49418
Sheep Creek Formation	J1333	10.3	8.08333	-9.16827
Sheep Creek Formation	J1333	11.3	7.96033	-9.1069
Sheep Creek Formation	J1333	12.4	7.5865	-9.05728
Sheep Creek Formation	J1333	13.3	7.3625	-9.61754
Sheep Creek Formation	J1333	15.3	7.4545	-10.9825
Sheep Creek Formation	J1333	17.1	8.3165	-8.84446
Sheep Creek Formation	J1333	19.4	9.0775	-8.79596
Sheep Creek Formation	J1333	20.3	8.3195	-11.4616
Sheep Creek Formation	J1333	21.9	8.4675	-8.81378
Sheep Creek Formation	J1333	22	7.9205	-9.32652
Sheep Creek Formation	J1333	23.6	7.9645	-7.76552
Sheep Creek Formation	J1333	24.8	8.0735	-9.1919
Sheep Creek Formation	J1333	26.9	7.6725	-10.4391
Sheep Creek Formation	J1333	28.1	7.8555	-10.939
Sheep Creek Formation	J1333	33.2	7.7305	-11.1469
Sheep Creek Formation	J1333	33.3	8.1535	-9.25327
Firth River Group Undivided	J1336	0.1	6.4305	-11.9912
Firth River Group Undivided	J1336	1.2	6.3575	-12.5376
Firth River Group Undivided	J1336	2.3	6.1365	-12.7742
Firth River Group Undivided	J1336	4.8	6.3735	-12.4248
Firth River Group Undivided	J1336	5.9	6.3075	-12.4733
Firth River Group Undivided	J1336	6	6.2975	-12.1169
Firth River Group Undivided	J1336	10.1	6.4455	-11.6992
Firth River Group Undivided	J1336	12.2	6.3505	-12.0536
Firth River Group Undivided	J1336	14.6	6.4155	-11.7299
Firth River Group Undivided	J1336	15.8	6.4545	-11.8704
Firth River Group Undivided	J1336	17.7	6.3065	-12.3881
Firth River Group Undivided	J1336	20.1	6.3825	-11.9338
Firth River Group Undivided	J1336	22.2	6.3935	-11.9684
Firth River Group Undivided	J1347	0.1	8.42333	-7.49542
Firth River Group Undivided	J1347	2.1	8.22433	-7.66171
Firth River Group Undivided	J1347	2.8	8.69033	-8.01707
Firth River Group Undivided	J1347	3.5	8.56233	-7.63499
Firth River Group Undivided	J1347	4.1	8.44033	-7.98341
Firth River Group Undivided	J1347	5.6	8.13533	-8.17941
Firth River Group Undivided	J1347	7.6	8.54933	-7.88641
Firth River Group Undivided	J1347	8.7	8.51033	-8.12496
Firth River Group Undivided	J1347	9.7	8.47633	-8.25958
Firth River Group Undivided	J1347	13.8	8.84133	-7.67062
Firth River Group Undivided	J1347	15.2	8.91233	-7.35585
Firth River Group Undivided	J1347	17	8.74833	-7.19351
Firth River Group Undivided	J1347	18.9	9.09333	-7.9656
Firth River Group Undivided	J1347	19.8	8.85133	-7.40534
Firth River Group Undivided	J1347	21.1	9.11433	-7.21628
Firth River Group Undivided	J1347	23.1	9.54633	-9.57015
Firth River Group Undivided	J1347	25.4	9.62233	-7.82702
Firth River Group Undivided	J1347	27.5	9.48033	-9.71566
Firth River Group Undivided	J1347	29.9	9.52533	-8.89111
Firth River Group Undivided	J1347	34.2	9.58933	-9.83147
Firth River Group Undivided	J1347	35.7	9.19333	-11.3202
Firth River Group Undivided	J1347	39.8	7.92933	-13.3771
Firth River Group Undivided	J1347	41.9	8.38433	-9.38604
Firth River Group Undivided	J1347	43	8.05633	-10.9569
Firth River Group Undivided	J1347	53.3	8.86433	-8.85152
Firth River Group Undivided	J1347	55.4	8.59633	-10.8708
Firth River Group Undivided	J1347	56.3	8.77133	-8.22098
Firth River Group Undivided	J1347	59.7	8.35533	-8.62187
Firth River Group Undivided	J1347	61.8	8.84333	-8.51497
Firth River Group Undivided	J1347	63.7	8.66033	-8.97129
Firth River Group Undivided	J1347	65.9	8.99033	-8.00222
Firth River Group Undivided	J1347	68.1	9.05633	-9.5553
Firth River Group Undivided	J1347	70.8	8.94033	-9.78891
Firth River Group Undivided	J1502	A	6.2429	-11.4275
Firth River Group Undivided	J1502	B	5.0197	-11.7375
Firth River Group Undivided	J1502	C	5.3839	-10.3611
Firth River Group Undivided	J1502	D	5.5953	-10.7843
Firth River Group Undivided	J1502	E	5.4461	-11.9587
Firth River Group Undivided	J1502	F	5.3779	-12.6184
Firth River Group Undivided	J1502	G	4.0612	-12.4185
Firth River Group Undivided	J1502	H	4.875	-12.2085

## Sheet: Table DR2
Table DR2. Major and trace element data from the Sheep Creek formation, northeast Brooks Range basinal succession, Yukon, Canada
	Ag	Al	As	Ba	Be	Bi	Ca	Cd	Co	Cr	Cu	Fe	Hg	K	La	Li	Mg	Mn	Mo	Na	Ni	P	Pb	S	Sb	Sc	Sn	Sr	Ti	V	W	Y	Zn	Zr
	ppm	%	ppm	ppm	ppm	ppm	%	ppm	ppm	ppm	ppm	%	ppm	%	ppm	ppm	%	ppm	ppm	%	ppm	%	ppm	%	ppm	ppm	ppm	ppm	%	ppm	ppm	ppm	ppm	ppm
J1347 2.8	<2	0.03	<3	23	<0.5	<5	>15	<1	<1	<1	0.6	0.19	<1	<0.01	0.9	1	0.2	168	<1	0.02	<1	0.01	<2	0.02	<5	<0.5	<10	1690	<0.01	2	<10	0.6	1	2
J1347 5.6	<2	0.03	4	17	<0.5	<5	>15	<1	<1	<1	<0.5	0.11	<1	<0.01	0.7	1	0.19	124	<1	0.01	<1	0.02	<2	<0.01	<5	<0.5	<10	1220	<0.01	<1	<10	0.5	<1	1.5
J1347 17	<2	0.02	<3	42	<0.5	<5	>15	<1	<1	<1	<0.5	0.04	<1	<0.01	0.6	<1	0.08	7	<1	0.01	<1	0.01	<2	0.02	<5	<0.5	<10	2670	<0.01	2	<10	<0.5	1	0.8
J1347 19.8	<2	0.01	<3	28	<0.5	<5	>15	<1	<1	<1	<0.5	0.03	2	<0.01	<0.5	<1	0.1	8	<1	0.01	<1	0.01	<2	<0.01	<5	<0.5	<10	2570	<0.01	<1	<10	<0.5	<1	0.8
J1347 27.5	<2	0.05	8	42	<0.5	<5	>15	<1	<1	1	1.3	0.1	<1	0.02	1.1	<1	0.07	26	<1	0.02	<1	0.03	<2	0.03	<5	0.5	<10	2700	<0.01	1	<10	1	2	1
J1347 29.9	<2	0.04	8	34	<0.5	<5	>15	<1	<1	<1	1	0.09	<1	0.02	1	<1	0.07	22	<1	0.01	<1	0.03	<2	0.03	<5	<0.5	<10	2700	<0.01	<1	<10	0.8	2	1.2
J1347 41.9	<2	0.03	9	23	<0.5	<5	>15	<1	<1	1	0.6	0.05	1	0.01	0.6	<1	0.12	14	<1	0.01	<1	0.02	<2	0.01	<5	<0.5	<10	2470	<0.01	1	<10	<0.5	<1	0.8
J1347 63.7	<2	0.02	<3	14	<0.5	<5	>15	<1	<1	<1	<0.5	0.03	2	<0.01	<0.5	<1	0.11	95	<1	0.01	<1	0.02	<2	0.01	<5	<0.5	<10	1800	<0.01	<1	<10	<0.5	2	0.8
J1347 68.1	<2	0.05	4	27	<0.5	<5	>15	<1	1	2	1.4	0.1	<1	0.02	1.3	<1	0.12	29	<1	0.01	1	0.02	<2	0.01	<5	0.7	<10	2630	<0.01	4	<10	1.5	1	1.4
J1333 0.2	<2	0.11	8	46	<0.5	<5	>15	<1	<1	2	4.3	0.36	<1	0.06	2.3	<1	0.15	68	<1	0.01	4	0.02	<2	0.02	<5	1.8	<10	1130	<0.01	3	<10	2.2	6	1.5
J1333 7.4	<2	0.01	4	39	<0.5	<5	>15	<1	<1	<1	<0.5	0.07	<1	<0.01	0.6	<1	0.2	65	<1	0.01	<1	0.01	<2	<0.01	<5	<0.5	<10	1440	<0.01	<1	<10	0.7	3	0.5
J1333 13.3	<2	0.01	<3	18	<0.5	<5	>15	<1	<1	<1	<0.5	0.04	<1	<0.01	0.5	<1	0.14	67	<1	0.01	<1	0.03	<2	<0.01	<5	<0.5	<10	997	<0.01	<1	<10	0.7	3	0.5
J1333 22	<2	0.01	5	27	<0.5	<5	>15	<1	<1	<1	<0.5	0.04	<1	<0.01	0.6	<1	0.08	84	<1	0.01	<1	0.04	<2	0.01	<5	<0.5	<10	1870	<0.01	<1	<10	0.9	3	0.6
J1333 26.9	<2	0.06	3	27	<0.5	<5	>15	<1	<1	2	3.2	0.11	<1	0.03	1.2	<1	0.09	54	<1	0.01	2	0.01	<2	0.03	<5	<0.5	<10	1750	<0.01	2	<10	0.8	3	1.4
J1336 0.1	<2	0.65	3	30	<0.5	<5	>15	<1	3	8	7.2	1.25	<1	0.19	5.2	23	0.29	160	<1	0.03	7	<0.01	3	<0.01	<5	4.8	<10	1540	<0.01	8	<10	9.5	22	5
J1336 4.8	<2	0.46	<3	26	<0.5	<5	>15	<1	1	5	6.7	0.93	<1	0.17	7.7	9	0.22	188	<1	0.03	3	0.03	<2	0.01	<5	3	<10	1820	<0.01	7	<10	11	13	4.8
J1336 12.2	<2	0.47	<3	17	<0.5	<5	>15	<1	1	6	6	1.06	<1	0.13	5.3	16	0.24	193	<1	0.02	4	<0.01	<2	<0.01	<5	3.7	<10	1400	<0.01	6	<10	8.7	11	3.3
J1336 15.8	<2	0.41	<3	20	<0.5	<5	>15	<1	2	5	3	0.84	<1	0.15	5.5	8	0.2	150	<1	0.03	3	0.01	<2	0.01	<5	3.1	<10	2010	<0.01	6	<10	9.5	11	4.2
J1336 20.1	<2	0.29	<3	20	<0.5	<5	>15	<1	1	4	3.7	0.79	<1	0.12	5.5	6	0.2	163	<1	0.03	3	<0.01	<2	<0.01	<5	2.9	<10	2300	<0.01	5	<10	9.3	8	3.3

## Sheet: Table DR3
Table DR3. Strontium isotopic data from the Firth River Group, British Mountains, Brooks Range, Alaska.
Unit	Section	Stratigraphic Height (m)	Strontium Concentration (ppm)	87Sr/86Sr
Sheep Creek Fm	J1333	7.4	1440	0.707464
Sheep Creek Fm	J1333	22	1870	0.707423
Sheep Creek Fm	J1333	26.9	1750	0.708564
Firth River Group	J1336	0.1	1540	0.710205
Firth River Group	J1336	4.8	1820	0.710236
Firth River Group	J1336	15.8	2010	0.709893
Firth River Group	J1336	20.1	2300	0.710053
Firth River Group	J1347	2.8	1690	0.707437
Firth River Group	J1347	17	2670	0.707373
Firth River Group	J1347	19.8	2570	0.707256
Firth River Group	J1347	27.5	2700	0.707405
Firth River Group	J1347	29.9	2700	0.70739
Firth River Group	J1347	41.9	2470	0.707369
Firth River Group	J1347	63.7	1800	0.707339
Firth River Group	J1347	68.1	2630	0.707346

## Sheet: Table DR4
TABLE DR4. RAW POINT-COUNT DATA FOR THE NORTHEAST BROOKS RANGE BASINAL SUCCESSION, ALASKA AND YUKON
Sample	Total Count	FG Count	Framework Grains (FG)																						Non-Framework Materials
			Qm	Qpg	Qc	P	K	Lsa	Lac	Lss	Lsc	Lm	Lv	Ld	Lgr	wm	ch	bt	px	am	ep	hm	op	ofg	Cm	Cc	Cs	Cz	OC
			(mono)	(poly)	(chert)	(plagioclase)	(k-spar)	(mud&shale)	(carbshale)	(siltstone)	(detritalcarb)	(phyllite&schist)	(volcanic)	(diabase&mgabbro)	(granitic)	(whitemica)	(chlorite)	(biotite)	(pyroxenes)	(amphibole)	(epidote)	(heavymineral)	(opaque)	(uncertainorigin)	(clay)	(carbonate)	(siliceous)	(zeolites)	(other cements)
Firth River Group
J1111 - Malcolm River formation	413	339	295	3	11	3	0	3	0	0	16	0	0	0	0	0	0	0	0	0	0	0	8	0	0	74	0	0	0
J1115 – Fish Creek formation	337	337	109	13	2	0	0	0	0	0	211	0	0	0	0	0	0	0	0	0	0	0	2	0	0	0	0	0	0
F1147 – Redwacke Creek formation	371	306	87	15	3	51	9	0	0	0	0	0	3	0	0	0	24	8	103	3	0	0	0	0	65	0	0	0	0
Neruokpuk Formation
J1327	322	322	305	13	0	0	0	0	0	0	0	0	4	0	0	0	0	0	0	0	0	0	0	0	0	0	0	0	0
J1349	308	306	203	85	2	14	0	0	0	0	0	0	2	0	0	0	0	0	0	0	0	0	0	0	0	2	0	0	0
J1355-180.5	334	325	263	16	0	32	6	0	0	0	0	0	7	0	0	1	0	0	0	0	0	0	0	0	0	9	0	0	0
J1355-671	384	324	200	17	1	71	0	0	0	0	0	0	5	0	0	26	0	0	0	0	0	0	4	0	60	0	0	0	0
12JT11	400	400	304	65	3	23	0	0	0	0	0	1	2	0	0	1	0	0	0	0	0	0	1	0	0	0	0	0	0
05LF13	304	304	246	37	0	19	0	0	0	0	0	0	0	0	0	2	0	0	0	0	0	0	0	0	0	0	0	0	0
12JT32	420	420	346	62	2	0	0	0	0	1	8	1	0	0	0	0	0	0	0	0	0	0	0	0	0	0	0	0	0
Clarence River Group
J1118 – Buckland Hills formation	336	331	236	12	14	20	9	0	0	0	7	0	26	0	0	0	0	0	0	0	0	2	5	0	0	5	0	0	0
J1319 – Buckland Hills formation	346	346	152	45	55	15	8	11	0	0	0	0	5	0	0	0	0	0	0	0	0	0	55	0	0	0	0	0	0
J1341 – Buckland Hills formation	332	325	100	7	105	38	0	0	0	0	0	0	71	0	0	0	0	0	0	0	0	0	4	0	7	0	0	0	0
14BJ29 – Buckland Hills formation	314	314	118	48	76	59	0	0	0	4	0	0	7	0	0	0	0	0	0	0	0	1	1	0	0	0	0	0	0
09LF13 – Buckland Hills formation	303	303	268	13	1	3	0	0	0	0	0	0	0	0	0	18	0	0	0	0	0	0	0	0	0	0	0	0	0
25LF13 – Aichilik formation	300	300	219	39	1	32	0	0	0	1	0	0	5	0	0	3	0	0	0	0	0	0	0	0	0	0	0	0	0
26LF13 – Aichilik formation	301	301	164	52	27	41	0	0	0	3	3	0	4	0	0	7	0	0	0	0	0	0	0	0	0	0	0	0	0
12JT22 – Buckland Hills formation	410	410	200	68	4	65	0	0	0	3	19	2	7	0	0	40	0	0	0	0	0	2	0	0	0	0	0	0	0
12JT23 – Buckland Hills formation	402	402	59	67	60	136	0	0	0	6	0	21	46	0	2	0	0	0	0	0	0	0	5	0	0	0	0	0
Ekaluakat Formation
12JT35	303	303	71	23	26	89	0	0	0	16	9	33	13	0	0	0	0	0	1	0	0	1	21	0	0	0	0	0	0
Romanzof formation
14BJ20	300	300	100	20	46	104	0	0	0	2	0	0	27	0	0	0	0	0	0	0	0	1	0	0	0	0	0	0	0
14BJ25	314	314	274	24	14	0	0	0	0	1	0	0	0	0	0	0	0	0	0	0	0	0	1	0	0	0	0	0	0

## Sheet: Table DR5
Table DR5. U-Pb geochronologic analyses from the Northeast Brooks Range Basinal Succession.
							Isotope ratios						Apparent ages (Ma)
Analysis	U	206Pb	U/Th	206Pb*	±	207Pb*	±	206Pb*	±	error	206Pb*	±	207Pb*	±	206Pb*	±	Best age	±	Conc
	(ppm)	204Pb		207Pb*	(%)	235U*	(%)	238U	(%)	corr.	238U*	(Ma)	235U	(Ma)	207Pb*	(Ma)	(Ma)	(Ma)	(%)
J1334, Firth River Group, Fish Creek Formation						(n=89/100)
29	139.897	4665.27	1.82248	16.1829	0.849489	0.922674	0.90938	0.108294	0.324562	0.356905	662.832	2.0444	663.773	4.43119	666.969	18.1974	662.832	2.0444	99.3797
95	193.498	10187.1	3.10436	13.1594	0.931224	2.00931	2.16725	0.19177	1.95699	0.902981	1130.96	20.3	1118.66	14.6943	1094.86	18.6252	1130.96	20.3	103.297
74	74.5025	4678.17	2.9916	11.9608	0.546661	2.48224	1.96558	0.21533	1.88803	0.960547	1257.15	21.5645	1266.87	14.2277	1283.39	10.6305	1283.39	10.6305	97.9555
31	66.6904	4457.19	2.03063	11.6894	0.576447	2.63501	2.2626	0.223395	2.18793	0.967001	1299.79	25.7549	1310.47	16.6553	1327.97	11.1587	1327.97	11.1587	97.8781
84	148.876	9872.9	0.949759	11.4345	0.662946	2.8303	1.08443	0.23472	0.858187	0.791374	1359.19	10.5168	1363.6	8.13653	1370.51	12.7577	1370.51	12.7577	99.174
51	103.269	8552.44	2.39066	10.9404	0.962759	3.11534	1.36399	0.247193	0.966216	0.708373	1423.98	12.3451	1436.48	10.4847	1455.02	18.3141	1455.02	18.3141	97.8668
65	118.157	8666.13	2.35743	10.8836	0.923897	3.21527	1.4006	0.253798	1.05267	0.751581	1458.03	13.7363	1460.85	10.8481	1464.92	17.5514	1464.92	17.5514	99.5298
35	108.801	10259.4	1.43513	10.6193	0.521461	3.42923	2.92912	0.264115	2.88232	0.984026	1510.86	38.8215	1511.12	23.0308	1511.47	9.84311	1511.47	9.84311	99.9598
93	203.283	15806.9	1.31497	10.0473	0.930347	4.01606	3.03514	0.292651	2.88904	0.951863	1654.76	42.1644	1637.45	24.6793	1615.28	17.3252	1615.28	17.3252	102.444
100	69.5386	5869.35	1.52153	9.93275	0.616793	4.14641	1.94233	0.298704	1.84179	0.94824	1684.88	27.3082	1663.5	15.8912	1636.61	11.4555	1636.61	11.4555	102.949
91	86.5256	7515.64	1.40602	9.80139	0.768555	4.14685	2.82019	0.294785	2.71345	0.96215	1665.39	39.8247	1663.59	23.076	1661.29	14.2275	1661.29	14.2275	100.247
69	85.5965	6967.41	1.44936	9.72892	0.850881	4.02932	1.55075	0.284312	1.29647	0.836026	1613.04	18.5015	1640.13	12.6159	1675.02	15.7242	1675.02	15.7242	96.3001
77	199.985	14989.9	2.4268	9.39973	0.639955	4.1745	1.63492	0.284589	1.50446	0.920208	1614.43	21.486	1669.03	13.3933	1738.38	11.7316	1738.38	11.7316	92.8702
57	109.836	9051.19	1.62036	9.21608	0.909402	4.65646	1.20681	0.311244	0.793327	0.657378	1746.82	12.1391	1759.45	10.0877	1774.47	16.5973	1774.47	16.5973	98.4422
62	836.304	44026.4	3.20055	9.16094	1.65102	4.44307	3.64944	0.295204	3.25462	0.891813	1667.48	47.82	1720.41	30.2569	1785.41	30.0947	1785.41	30.0947	93.3948
20	42.6066	4812.32	5.38565	9.04412	0.613377	4.71061	2.29814	0.308988	2.21477	0.963724	1735.73	33.7022	1769.13	19.251	1808.77	11.1466	1808.77	11.1466	95.9616
71	172.113	16387.7	2.2893	9.02771	0.903417	4.92134	1.63989	0.322225	1.3686	0.83457	1800.59	21.5006	1805.92	13.8399	1812.07	16.4119	1812.07	16.4119	99.3662
63	113.063	9912.72	0.833529	9.00735	0.939464	4.89711	1.24149	0.319916	0.811607	0.653736	1789.32	12.681	1801.76	10.4686	1816.17	17.0583	1816.17	17.0583	98.5215
66	25.52	2377.73	11.3986	8.98549	0.881227	5.13984	1.28094	0.334958	0.929642	0.725753	1862.37	15.0369	1842.72	10.8885	1820.58	15.9921	1820.58	15.9921	102.295
55	101.903	9493.49	1.27689	8.98126	0.508833	5.09744	0.893713	0.332039	0.734719	0.822097	1848.25	11.8062	1835.68	7.58648	1821.43	9.23219	1821.43	9.23219	101.473
21	35.9901	2967.55	0.335828	8.95427	0.732246	4.89627	1.40808	0.317976	1.20271	0.854147	1779.84	18.7053	1801.61	11.8731	1826.89	13.2778	1826.89	13.2778	97.4242
98	87.1089	7747.82	0.999966	8.94254	0.840379	5.30498	1.85845	0.344067	1.65758	0.891919	1906.21	27.3539	1869.67	15.8787	1829.27	15.2345	1829.27	15.2345	104.206
96	51.7558	4800.33	0.383883	8.92901	0.822557	4.95037	2.17506	0.320582	2.01352	0.925733	1792.57	31.5103	1810.89	18.3756	1832.01	14.9083	1832.01	14.9083	97.8471
11	84.598	8529.38	1.64184	8.92387	0.933213	4.90984	1.37796	0.317775	1.01385	0.735761	1778.85	15.7606	1803.95	11.6246	1833.06	16.9099	1833.06	16.9099	97.0428
34	73.655	7931.19	1.68196	8.89961	0.942893	4.91375	3.05152	0.317163	2.9022	0.951065	1775.86	45.0501	1804.62	25.7508	1837.99	17.075	1837.99	17.075	96.6197
40	155.941	17912.5	2.67406	8.89833	0.598805	5.30065	1.80526	0.342087	1.70306	0.943385	1896.7	27.9837	1868.97	15.4222	1838.25	10.8446	1838.25	10.8446	103.18
26	189.95	20098.6	0.838174	8.889	0.725463	4.92296	1.36878	0.317379	1.16071	0.847993	1776.92	18.0265	1806.2	11.5523	1840.15	13.1354	1840.15	13.1354	96.5635
12	113.386	10239.4	1.60883	8.87637	0.820125	4.91536	1.82878	0.316439	1.63457	0.893806	1772.31	25.3288	1804.9	15.4312	1842.72	14.8429	1842.72	14.8429	96.1789
68	44.1576	4973.82	0.481858	8.87429	0.917777	5.07214	1.7837	0.326455	1.52947	0.857469	1821.18	24.2656	1831.46	15.1298	1843.15	16.6097	1843.15	16.6097	98.808
97	228.219	20681.2	4.58419	8.87074	0.826226	5.17809	1.43125	0.333141	1.16869	0.816549	1853.59	18.8265	1849.02	12.181	1843.87	14.9513	1843.87	14.9513	100.527
46	46.9272	4698.49	0.869739	8.82435	0.501013	5.00733	3.1999	0.32047	3.16043	0.987667	1792.03	49.4461	1820.56	27.089	1853.36	9.05501	1853.36	9.05501	96.6908
67	134.626	12058.9	2.49399	8.82306	0.763973	5.12471	1.38715	0.327934	1.15781	0.83467	1828.36	18.4318	1840.21	11.7857	1853.62	13.8083	1853.62	13.8083	98.6373
8	95.7064	9896.51	1.1587	8.81837	0.565313	5.02327	1.88404	0.321272	1.79723	0.953922	1795.94	28.1712	1823.25	15.9555	1854.58	10.2159	1854.58	10.2159	96.8381
76	187.811	18845.9	1.77933	8.81493	0.876775	5.16814	2.20482	0.330409	2.023	0.917532	1840.36	32.388	1847.39	18.76	1855.28	15.8443	1855.28	15.8443	99.1958
75	54.13	5190.15	0.80278	8.79014	0.649254	5.3815	1.07102	0.343082	0.851798	0.795312	1901.48	14.0265	1881.91	9.17109	1860.37	11.7249	1860.37	11.7249	102.21
47	64.1757	7603.82	1.50696	8.7857	0.551782	5.03606	1.08823	0.320898	0.937964	0.861919	1794.11	14.6893	1825.41	9.21932	1861.28	9.96329	1861.28	9.96329	96.391
9	119.955	13406.6	1.75801	8.52962	0.727426	5.44259	1.614	0.336693	1.44078	0.892677	1870.74	23.3949	1891.59	13.8454	1914.53	13.0518	1914.53	13.0518	97.7127
36	280.629	28769.2	2.35045	8.52912	0.74372	5.58932	3.01736	0.34575	2.92426	0.969148	1914.27	48.4329	1914.45	25.9938	1914.64	13.3441	1914.64	13.3441	99.9808
24	56.5779	5807.11	1.53675	8.52459	0.814963	5.50752	1.20692	0.340509	0.890218	0.737596	1889.12	14.5772	1901.77	10.372	1915.59	14.6209	1915.59	14.6209	98.618
41	38.9498	4499.75	0.782178	8.5233	0.921944	5.5582	1.80869	0.34359	1.55607	0.860334	1903.92	25.6522	1909.65	15.566	1915.86	16.54	1915.86	16.54	99.3765
82	195.947	19577.3	0.713353	8.51609	0.551737	5.48375	2.21352	0.338701	2.14365	0.968437	1880.42	34.9631	1898.05	19.0114	1917.38	9.89561	1917.38	9.89561	98.0723
44	60.3874	6131.02	0.736154	8.49188	0.998684	5.63789	1.38244	0.347231	0.955918	0.69147	1921.37	15.8824	1921.91	11.9229	1922.48	17.903	1922.48	17.903	99.9418
25	173.044	17591.2	1.39131	8.47911	0.766872	5.50836	1.51989	0.338744	1.31224	0.863378	1880.62	21.4045	1901.9	13.0622	1925.18	13.7424	1925.18	13.7424	97.6853
4	104.055	10350.4	2.4827	8.43524	0.794556	5.29836	1.66394	0.324144	1.46198	0.878624	1809.93	23.0708	1868.6	14.2138	1934.47	14.2229	1934.47	14.2229	93.5622
18	134.289	15957.6	1.66014	8.4289	0.816095	5.53226	1.69046	0.338199	1.48042	0.87575	1878	24.1189	1905.62	14.538	1935.82	14.6062	1935.82	14.6062	97.0133
32	39.307	3806.43	0.591556	8.39844	0.957857	5.76783	2.40588	0.351325	2.20698	0.917328	1940.92	36.9889	1941.6	20.8223	1942.3	17.1308	1942.3	17.1308	99.9294
45	183.793	18740.9	1.87969	8.39198	0.594209	5.75363	2.01204	0.350191	1.9223	0.955397	1935.51	32.1405	1939.46	17.4066	1943.67	10.6265	1943.67	10.6265	99.5803
94	118.39	11241.6	0.81959	8.34177	0.627405	5.92467	4.33939	0.358444	4.29379	0.989493	1974.8	73.0395	1964.86	37.7158	1954.4	11.2039	1954.4	11.2039	101.044
87	357.521	29501.3	2.49086	8.30759	1.04459	5.60353	6.40263	0.337626	6.31684	0.986601	1875.24	102.791	1916.64	55.2206	1961.73	18.6396	1961.73	18.6396	95.5913
48	175.245	17122.2	1.03442	8.29201	0.578821	5.94143	2.01775	0.357313	1.93295	0.957971	1969.43	32.8029	1967.31	17.5381	1965.07	10.3233	1965.07	10.3233	100.222
54	47.2316	4772.2	2.477	8.29	0.553229	5.7687	1.01145	0.346842	0.846741	0.837155	1919.5	14.0567	1941.73	8.75302	1965.5	9.86625	1965.5	9.86625	97.6594
16	88.2316	9258.79	0.467739	8.27775	0.546509	5.63164	1.77893	0.3381	1.6929	0.951641	1877.52	27.5747	1920.95	15.3404	1968.14	9.74338	1968.14	9.74338	95.3958
14	127.834	9429.97	1.89195	8.26296	2.46506	5.70452	5.38938	0.341864	4.79259	0.889265	1895.63	78.7145	1932.05	46.5934	1971.33	43.9433	1971.33	43.9433	96.1601
99	194.295	20048.6	2.10537	8.03221	0.977377	6.39344	2.37515	0.37245	2.16473	0.911409	2040.92	37.8703	2031.37	20.8578	2021.66	17.3189	2021.66	17.3189	100.952
10	80.9314	10728.9	1.85888	8.00449	0.653153	6.20864	1.92998	0.360437	1.8161	0.940994	1984.24	31.0179	2005.67	16.8798	2027.79	11.5646	2027.79	11.5646	97.8527
60	242.785	24997.8	4.52049	7.96838	1.54782	6.69925	1.82117	0.387164	0.959635	0.526934	2109.66	17.266	2072.52	16.0914	2035.79	27.3848	2035.79	27.3848	103.628
90	59.7955	6102.54	1.48642	7.86708	0.553018	6.75325	2.57786	0.385324	2.51784	0.976718	2101.1	45.1469	2079.62	22.8029	2058.39	9.75923	2058.39	9.75923	102.075
43	135.086	15909.3	1.87277	7.77016	0.618696	6.51333	1.22341	0.367055	1.05544	0.862701	2015.53	18.2682	2047.7	10.7693	2080.24	10.8891	2080.24	10.8891	96.8893
73	73.1411	8363.91	1.30545	7.73038	0.751679	6.87602	2.3284	0.385511	2.20373	0.946457	2101.98	39.5284	2095.57	20.6433	2089.27	13.2188	2089.27	13.2188	100.608
7	175.926	18977.8	1.14004	7.66104	0.512928	6.50136	1.68524	0.361235	1.60528	0.952555	1988.03	27.4618	2046.08	14.8315	2105.1	9.00178	2105.1	9.00178	94.4385
92	131.576	14435.9	0.841258	6.9583	0.656309	8.60132	2.23078	0.434078	2.13205	0.955742	2324.07	41.6021	2296.7	20.2945	2272.41	11.3094	2272.41	11.3094	102.273
19	257.514	37134.8	2.14136	6.81543	0.829255	8.36899	2.08327	0.413681	1.91111	0.917362	2231.73	36.0514	2271.82	18.8975	2308.1	14.2361	2308.1	14.2361	96.6913
80	223.196	25346.7	2.30993	6.79054	0.500199	8.79348	0.946226	0.433076	0.803209	0.848856	2319.57	15.6474	2316.82	8.62698	2314.38	8.58287	2314.38	8.58287	100.224
30	55.2332	7960.98	2.44667	6.77589	0.77025	8.45424	1.54766	0.41547	1.34238	0.867358	2239.88	25.4001	2281.02	14.0534	2318.08	13.2116	2318.08	13.2116	96.6266
2	85.8458	10869.4	2.03429	6.72802	0.567005	8.21604	1.22022	0.400911	1.08048	0.885481	2173.23	19.933	2255.11	11.0459	2330.24	9.71282	2330.24	9.71282	93.2624
86	236.223	30942.7	1.88537	6.63359	0.703102	9.13874	1.88766	0.439677	1.75183	0.928043	2349.19	34.4891	2352	17.2782	2354.41	12.0114	2354.41	12.0114	99.7784
81	119.258	17652.7	2.29425	6.00747	0.544169	11.1017	1.14862	0.483706	1.01154	0.880655	2543.39	21.2587	2531.7	10.6996	2522.34	9.14109	2522.34	9.14109	100.834
52	154.585	18916.9	2.15287	5.87265	1.54754	11.1361	2.82275	0.474315	2.36073	0.836322	2502.46	48.961	2534.59	26.306	2560.39	25.8971	2560.39	25.8971	97.7373
27	171.842	24790.6	2.50129	5.84521	0.614304	11.2302	2.75019	0.476087	2.68071	0.974734	2510.2	55.7382	2542.42	25.6472	2568.22	10.2729	2568.22	10.2729	97.7406
22	127.793	18802.1	2.00094	5.83972	0.725013	11.3119	1.54191	0.479098	1.36083	0.882558	2523.34	28.4153	2549.18	14.3856	2569.8	12.1224	2569.8	12.1224	98.1921
5	202.943	30678.1	2.50709	5.73341	0.919703	11.184	1.43552	0.465061	1.10221	0.767813	2461.86	22.5548	2538.58	13.3805	2600.46	15.329	2600.46	15.329	94.6702
23	82.3054	13064.5	1.33467	5.68908	0.61676	11.4811	2.12913	0.473725	2.03785	0.957125	2499.87	42.2285	2563.05	19.8893	2613.39	10.2689	2613.39	10.2689	95.6563
3	121.697	19551.2	1.07968	5.65227	0.705171	11.7988	2.48584	0.483681	2.38372	0.95892	2543.28	50.0957	2588.57	23.2727	2624.2	11.7287	2624.2	11.7287	96.9165
1	100.114	15679.5	4.09412	5.55326	0.798506	11.8205	1.01897	0.476081	0.633006	0.621219	2510.18	13.1613	2590.28	9.53974	2653.54	13.241	2653.54	13.241	94.5972
17	37.1687	6376.44	1.66214	5.54127	0.946363	11.9531	1.49202	0.480383	1.15348	0.773101	2528.93	24.1293	2600.73	13.981	2657.13	15.6881	2657.13	15.6881	95.1755
59	101.608	16130.3	1.55632	5.50516	0.783649	13.2843	1.95255	0.530406	1.78839	0.915926	2743.16	39.9566	2700.07	18.44	2667.96	12.9798	2667.96	12.9798	102.819
64	65.122	9926.67	1.34888	5.4649	0.789881	12.7495	3.1805	0.505328	3.08085	0.96867	2636.65	66.6725	2661.32	29.9541	2680.11	13.0647	2680.11	13.0647	98.3786
37	56.6824	9535.54	1.48158	5.43389	0.781053	13.419	2.07067	0.528846	1.91771	0.926132	2736.59	42.7636	2709.6	19.5695	2689.51	12.9074	2689.51	12.9074	101.75
53	102.693	15375.8	2.31775	5.43184	0.965269	13.0811	1.32972	0.515337	0.914558	0.687781	2679.37	20.0499	2685.52	12.5436	2690.14	15.9517	2690.14	15.9517	99.5998
56	114.462	17653.8	1.17558	5.42897	0.676451	13.2013	1.47568	0.519796	1.3115	0.888746	2698.31	28.916	2694.15	13.9296	2691.01	11.1767	2691.01	11.1767	100.271
61	113.674	15421.7	2.90085	5.42005	0.60564	12.9567	1.00686	0.509327	0.804345	0.798864	2653.76	17.4975	2676.51	9.49127	2693.73	10.0039	2693.73	10.0039	98.5161
39	105.115	14625.5	1.5006	5.40677	0.644732	12.1183	3.17303	0.475204	3.10684	0.979139	2506.34	64.5178	2613.61	29.771	2697.78	10.6459	2697.78	10.6459	92.9039
38	77.0682	11364.4	1.05353	5.38364	0.722304	13.207	1.38847	0.515677	1.1858	0.854034	2680.82	26.0077	2694.56	13.1066	2704.86	11.9225	2704.86	11.9225	99.1112
72	85.8116	10202.8	3.73995	5.38283	0.96453	13.3523	2.62042	0.521275	2.43645	0.929793	2704.59	53.8202	2704.89	24.7583	2705.11	15.9205	2705.11	15.9205	99.9808
58	128.104	21643.9	0.991914	5.37511	0.672332	13.5188	1.07003	0.527018	0.832423	0.777946	2728.88	18.5202	2716.6	10.1169	2707.48	11.0949	2707.48	11.0949	100.79
33	82.2924	14951.8	1.62423	5.32531	0.8242	13.4192	1.35431	0.518288	1.07464	0.793496	2691.92	23.6483	2709.61	12.7984	2722.82	13.578	2722.82	13.578	98.8648
6	39.971	5450.21	4.42987	5.3169	0.634082	12.4019	1.13395	0.478238	0.940093	0.829045	2519.59	19.606	2635.32	10.6552	2725.43	10.4425	2725.43	10.4425	92.4473
42	29.1605	4240.35	0.919143	5.27874	0.919348	13.2673	1.95815	0.507938	1.72892	0.882933	2647.82	37.5426	2698.86	18.4912	2737.28	15.1259	2737.28	15.1259	96.7317
50	140.398	27979.1	1.35162	4.07021	0.707737	21.6708	1.4212	0.639723	1.23245	0.867186	3187.93	30.9964	3169.09	13.795	3157.17	11.2269	3157.17	11.2269	100.974
Rejected Analyses: >10% discordant; >5% rev discordant; >10% 2s err; grains <500 Ma-evaluated by 1s err concordance; 1200 Ma cutoff
13	110.414	9563.66	1.3624	8.07302	0.971672	4.72475	6.55114	0.276639	6.47868	0.988939	1574.41	90.5062	1771.64	54.9532	2012.68	17.2357	2012.68	17.2357	78.2247
15	365.528	24070.2	1.28692	7.62394	15.9163	3.87652	29.3269	0.214349	24.6321	0.839914	1251.94	280.459	1608.81	241.15	2113.62	280.999	2113.62	280.999	59.2323
28	406.812	35902.5	1.07316	5.68132	0.952424	8.99325	2.98722	0.370565	2.83132	0.947811	2032.06	49.3492	2337.32	27.303	2615.67	15.8544	2615.67	15.8544	77.688
70	322.92	9143.92	0.891158	8.83561	2.61433	2.71783	11.8943	0.174164	11.6035	0.975546	1035.01	110.963	1333.34	88.5117	1851.05	47.2753	1851.05	47.2753	55.9148
78	369.34	11793.5	2.18057	8.82109	0.586794	4.01011	6.61567	0.256553	6.5896	0.996059	1472.18	86.7361	1636.25	53.817	1854.02	10.6049	1854.02	10.6049	79.4049
83	151.945	5165.73	0.676874	9.01533	12.0133	2.74008	20.6492	0.179161	16.7949	0.813346	1062.39	164.536	1339.4	154.797	1814.56	218.989	1814.56	218.989	58.5479
88	90.6673	9631.02	0.688917	8.62381	0.814021	5.7878	1.49142	0.362003	1.24968	0.837913	1991.66	21.4117	1944.59	12.9133	1894.8	14.6403	1894.8	14.6403	105.112
85	116.218	11981.1	1.4945	5.91783	0.583495	8.81915	3.66306	0.378519	3.61629	0.987232	2069.36	64.0133	2319.47	33.4182	2547.56	9.77421	2547.56	9.77421	81.2291
79	334.425	22366.2	2.84478	7.6363	0.805394	5.66069	3.60868	0.31351	3.51766	0.974777	1757.95	54.1252	1925.39	31.1505	2110.78	14.127	2110.78	14.127	83.2847
89	151.04	12102.2	2.40885	6.14248	1.5037	8.57132	4.87943	0.381848	4.64195	0.951331	2084.91	82.6937	2293.52	44.3968	2484.94	25.349	2484.94	25.349	83.9016
49	257.662	19530.9	0.55965	9.88489	0.847651	3.59253	2.27745	0.257555	2.11383	0.928155	1477.32	27.9083	1547.88	18.0914	1645.57	15.7252	1645.57	15.7252	89.7755
J1327, Neruokpuk Formation						(n=88/100)
40	311.57	6826.8	1.09271	16.883	0.899002	0.701101	2.18839	0.0858475	1.9952	0.911723	530.932	10.1687	539.448	9.15833	575.609	19.5235	530.932	10.1687	92.2382
67	92.5685	2607.5	1.55709	15.9111	0.759043	0.999993	1.94924	0.115397	1.79538	0.921067	704.016	11.974	703.806	9.89641	703.157	16.1358	704.016	11.974	100.122
65	227.31	8011.09	1.0339	15.7195	0.824395	1.02525	2.05883	0.116887	1.88657	0.916332	712.622	12.7277	716.548	10.5832	728.885	17.4616	712.622	12.7277	97.7688
39	27.7997	1266.23	-230.223	13.7171	1.64736	1.74103	2.02873	0.173207	1.18404	0.583635	1029.76	11.2687	1023.84	13.0849	1011.2	33.3899	1029.76	11.2687	101.835
78	86.6479	4941.69	1.62256	13.2649	0.969371	1.86778	1.62949	0.179692	1.3098	0.803807	1065.29	12.8612	1069.74	10.7765	1078.82	19.4529	1065.29	12.8612	98.7462
31	169.711	12439.8	3.97679	13.1331	0.548566	1.9151	1.49182	0.182413	1.3873	0.929938	1080.14	13.7967	1086.36	9.95172	1098.85	10.9572	1080.14	13.7967	98.298
43	81.1714	4443.89	6.98266	12.9234	1.10746	2.01613	2.00347	0.18897	1.66956	0.833333	1115.79	17.1058	1120.96	13.599	1130.96	22.0542	1115.79	17.1058	98.6587
24	104.878	5987.82	1.79464	12.7802	1.10004	2.046	1.58801	0.189645	1.1453	0.721212	1119.45	11.7695	1130.96	10.8312	1153.11	21.8351	1119.45	11.7695	97.0809
47	92.7885	5206.02	2.33882	12.2553	0.941298	2.2527	1.77044	0.200229	1.49948	0.846949	1176.55	16.1258	1197.63	12.4507	1235.89	18.4605	1176.55	16.1258	95.1984
85	137.666	7801.88	2.49029	12.1564	0.935255	2.41893	3.4727	0.213269	3.34439	0.963052	1246.21	37.8975	1248.24	24.9527	1251.74	18.3001	1251.74	18.3001	99.5586
72	217.18	12928.9	1.26615	12.0639	0.778932	2.39784	1.24965	0.2098	0.97718	0.781965	1227.75	10.9241	1241.96	8.95459	1266.69	15.1974	1266.69	15.1974	96.9257
22	20.6221	1463.44	1.20159	11.9675	1.30505	2.51748	1.77956	0.218508	1.20983	0.679845	1273.99	13.9856	1277.09	12.9331	1282.3	25.4079	1282.3	25.4079	99.3514
4	167.332	12095.2	2.49511	11.6521	0.696476	2.64329	2.16748	0.223381	2.05253	0.946967	1299.71	24.1598	1312.78	15.9688	1334.15	13.4705	1334.15	13.4705	97.4187
74	125.983	3737.82	2.24974	11.0459	0.660716	2.99338	5.65777	0.239806	5.61905	0.993158	1385.69	70.0657	1405.94	43.088	1436.75	12.5994	1436.75	12.5994	96.4464
54	153.77	11886.3	4.01569	11.0436	0.79944	3.15728	2.54348	0.252885	2.41458	0.949321	1453.34	31.4177	1446.78	19.6163	1437.14	15.244	1437.14	15.244	101.127
73	65.7768	4582.44	1.83995	11.0147	0.666503	3.14158	1.66928	0.250969	1.53045	0.916831	1443.47	19.793	1442.94	12.8577	1442.13	12.7005	1442.13	12.7005	100.093
34	128.097	8465.32	2.63828	10.9966	0.501632	3.08114	1.64803	0.245737	1.56983	0.95255	1416.45	19.9626	1428.01	12.6342	1445.26	9.55471	1445.26	9.55471	98.0066
84	199.33	12769.8	2.59955	10.9887	0.891604	3.13451	1.69194	0.249813	1.43795	0.849882	1437.51	18.5282	1441.2	13.0252	1446.64	16.9797	1446.64	16.9797	99.3692
41	128.536	8906.14	2.81104	10.9735	0.884687	3.07014	1.9742	0.244344	1.76488	0.893971	1409.24	22.3407	1425.27	15.1218	1449.27	16.8419	1449.27	16.8419	97.2376
48	296.45	21222.1	3.18314	10.9211	0.944011	3.02204	2.06045	0.239368	1.83147	0.888871	1383.41	22.8027	1413.2	15.721	1458.37	17.9493	1458.37	17.9493	94.8599
55	138.823	9809.06	3.25839	10.912	0.770321	3.15857	1.36493	0.249974	1.12679	0.825526	1438.34	14.5263	1447.09	10.527	1459.96	14.6436	1459.96	14.6436	98.519
91	104.634	7569.91	2.17163	10.8747	0.89886	3.23132	2.25087	0.254856	2.0636	0.916803	1463.47	27.0176	1464.7	17.4553	1466.48	17.0722	1466.48	17.0722	99.795
64	106.31	8327.05	1.00045	10.7708	0.836121	3.32253	1.75918	0.259546	1.54778	0.879829	1487.52	20.5603	1486.36	13.7308	1484.68	15.8418	1484.68	15.8418	100.191
59	41.3991	3266.64	1.37932	9.95172	0.650446	3.90882	1.82767	0.282126	1.70801	0.934529	1602.06	24.2283	1615.51	14.7784	1633.06	12.0861	1633.06	12.0861	98.1016
37	51.3224	4146.09	1.17499	9.81477	0.987655	3.93793	1.24736	0.280315	0.761866	0.610783	1592.95	10.7529	1621.51	10.1009	1658.77	18.29	1658.77	18.29	96.032
20	175.376	16909.1	3.3182	9.21877	0.745414	4.66232	1.60202	0.311727	1.41804	0.885155	1749.2	21.7239	1760.51	13.3946	1773.94	13.6048	1773.94	13.6048	98.6055
96	217.224	20461.3	2.29022	9.14679	0.867508	4.83762	2.51435	0.320922	2.35995	0.938594	1794.23	36.9614	1791.46	21.1599	1788.23	15.8057	1788.23	15.8057	100.336
16	101.792	9675.63	1.23769	8.96708	0.500338	4.9188	1.85986	0.319896	1.7913	0.963135	1789.22	27.9871	1805.49	15.6953	1824.3	9.07487	1824.3	9.07487	98.0772
21	102.364	11676.8	1.0769	8.94238	0.541091	5.02315	1.8642	0.325783	1.78394	0.95695	1817.91	28.2591	1823.23	15.7874	1829.3	9.81006	1829.3	9.81006	99.377
32	46.1711	3748.67	1.07076	8.93657	0.779519	4.82072	2.24501	0.312451	2.10533	0.937783	1752.76	32.3103	1788.52	18.8814	1830.48	14.129	1830.48	14.129	95.7538
42	199.205	15861.5	4.05942	8.93053	0.7244	4.91599	1.45248	0.31841	1.25895	0.866756	1781.96	19.6004	1805	12.2559	1831.71	13.1297	1831.71	13.1297	97.284
6	71.742	7650.81	1.29654	8.92049	0.512185	4.9609	1.10045	0.320958	0.973996	0.885085	1794.4	15.2558	1812.68	9.29957	1833.74	9.28094	1833.74	9.28094	97.8547
76	76.6677	6614.27	1.34688	8.91385	0.791353	5.01175	2.52545	0.324006	2.39826	0.949637	1809.26	37.834	1821.31	21.3807	1835.09	14.3373	1835.09	14.3373	98.5925
9	70.5064	7584.3	0.678707	8.90976	0.710318	4.98616	1.6083	0.322204	1.44294	0.897184	1800.49	22.6674	1816.98	13.6032	1835.93	12.8678	1835.93	12.8678	98.0696
27	103.6	9892.49	1.2382	8.90306	0.595361	4.85553	1.45619	0.313527	1.32892	0.912602	1758.04	20.4482	1794.57	12.2614	1837.29	10.7835	1837.29	10.7835	95.6865
82	166.953	18087.9	1.64177	8.88832	0.805295	5.05767	1.51765	0.326038	1.28638	0.847611	1819.15	20.3892	1829.03	12.8668	1840.29	14.5788	1840.29	14.5788	98.8514
49	86.5011	8591.19	1.67565	8.88777	0.814905	5.10891	1.69634	0.329321	1.48778	0.877054	1835.09	23.7601	1837.59	14.4057	1840.4	14.7526	1840.4	14.7526	99.7114
15	84.7993	8846.45	0.86974	8.88566	0.910046	5.00741	1.84818	0.322702	1.6086	0.870368	1802.91	25.2992	1820.58	15.6435	1840.83	16.4744	1840.83	16.4744	97.94
7	112.106	11745.1	1.75665	8.88174	0.877921	4.9684	2.03007	0.320047	1.83042	0.901653	1789.96	28.6085	1813.96	17.1609	1841.63	15.8912	1841.63	15.8912	97.1943
8	121.934	13110	2.07758	8.85858	0.514356	4.95256	1.37094	0.318194	1.2708	0.926951	1780.9	19.7746	1811.26	11.5823	1846.36	9.30407	1846.36	9.30407	96.455
86	47.2044	4228.28	1.02323	8.85576	0.614506	5.23356	2.31309	0.336141	2.22997	0.964066	1868.08	36.1653	1858.1	19.7215	1846.93	11.1153	1846.93	11.1153	101.145
68	135.507	12034.5	1.85995	8.82502	0.675019	5.09943	2.09935	0.326389	1.98787	0.946897	1820.86	31.5336	1836.01	17.8234	1853.22	12.2008	1853.22	12.2008	98.2537
62	76.8549	7030.48	2.75614	8.79868	0.69525	5.23608	2.45697	0.334135	2.35655	0.959129	1858.39	38.0472	1858.51	20.9501	1858.62	12.5584	1858.62	12.5584	99.988
10	45.8548	4507.97	0.98527	8.79645	0.655394	4.95135	1.81555	0.315885	1.69313	0.93257	1769.6	26.2013	1811.05	15.3384	1859.07	11.8377	1859.07	11.8377	95.1873
36	67.6475	7021.39	6.08185	8.77456	0.696416	5.19811	1.66265	0.330803	1.50978	0.908052	1842.27	24.1929	1852.31	14.1594	1863.58	12.572	1863.58	12.572	98.8568
5	118.109	11570.7	1.82247	8.75158	0.730146	5.20534	1.83339	0.330395	1.68172	0.917277	1840.3	26.9233	1853.49	15.6172	1868.31	13.1753	1868.31	13.1753	98.5008
44	80.5001	6739.43	0.655931	8.70458	0.670846	5.1428	1.65118	0.324673	1.50876	0.913747	1812.51	23.8385	1843.21	14.0374	1878.02	12.0911	1878.02	12.0911	96.5118
81	112.895	7880.26	2.09173	8.63973	2.20771	5.27477	3.39398	0.330524	2.57781	0.759526	1840.92	41.2815	1864.79	28.9776	1891.48	39.7256	1891.48	39.7256	97.3268
13	115.312	11997.4	1.47503	8.62697	0.521292	5.34345	1.21236	0.334332	1.09456	0.902838	1859.35	17.6797	1875.84	10.3699	1894.14	9.37549	1894.14	9.37549	98.163
87	18.982	1856.86	2.07362	8.55549	0.738204	5.59993	3.76606	0.347477	3.693	0.980601	1922.54	61.3925	1916.09	32.457	1909.1	13.2558	1909.1	13.2558	100.704
97	49.1326	5171.35	1.40063	8.53541	0.938755	5.64638	2.23676	0.349537	2.03023	0.907666	1932.39	33.8982	1923.21	19.2969	1913.31	16.8468	1913.31	16.8468	100.997
50	140.686	14871.6	0.949726	8.5097	0.926039	5.55184	2.39428	0.342649	2.20795	0.922176	1899.4	36.3244	1908.66	20.6034	1918.73	16.6079	1918.73	16.6079	98.9929
100	59.1806	5085.36	1.95453	8.50636	0.909147	5.58258	2.9217	0.344411	2.77665	0.950354	1907.86	45.8555	1913.41	25.1648	1919.43	16.3035	1919.43	16.3035	99.3969
56	44.2523	3815.41	0.517767	8.49496	0.586246	5.52318	3.56233	0.34029	3.51376	0.986366	1888.06	57.5112	1904.21	30.6356	1921.84	10.5091	1921.84	10.5091	98.2427
46	30.4074	3092.64	2.14264	8.48841	1.19261	5.35802	3.78289	0.32986	3.58997	0.949004	1837.7	57.4043	1878.17	32.3804	1923.22	21.3782	1923.22	21.3782	95.5535
71	115.788	11381.2	1.80108	8.45596	0.608947	5.70031	2.03192	0.349591	1.93852	0.954036	1932.64	32.3706	1931.41	17.5543	1930.08	10.9056	1930.08	10.9056	100.133
30	107.476	11794.7	1.41706	8.42754	0.85997	5.43116	1.77027	0.331965	1.54736	0.874079	1847.9	24.8606	1889.78	15.1812	1936.11	15.3911	1936.11	15.3911	95.444
69	94.7239	9044.7	0.536988	8.38382	0.687452	5.78709	1.93908	0.351885	1.81313	0.935047	1943.59	30.4237	1944.48	16.7897	1945.41	12.2915	1945.41	12.2915	99.9065
77	136.931	13639.4	1.05566	8.37516	0.882926	5.65587	2.46946	0.343551	2.30622	0.933898	1903.73	38.0156	1924.66	21.3103	1947.26	15.7832	1947.26	15.7832	97.7648
53	162.591	16754.9	2.35178	8.30764	0.675052	5.86262	1.36696	0.353238	1.18865	0.869556	1950.04	20.0016	1955.72	11.8579	1961.72	12.0446	1961.72	12.0446	99.405
89	29.2868	3147.55	1.31637	8.15248	1.36832	6.29034	2.64942	0.371931	2.26873	0.856312	2038.48	39.6493	2017.11	23.2157	1995.29	24.3218	1995.29	24.3218	102.165
18	48.3009	5278.17	0.961031	8.13743	0.821878	6.0891	2.25489	0.359368	2.09977	0.931208	1979.18	35.7846	1988.69	19.6685	1998.57	14.602	1998.57	14.602	99.0294
45	96.6229	9686.85	1.16182	8.09701	0.87585	6.13363	1.65967	0.360197	1.40975	0.849415	1983.11	24.0658	1995.04	14.4907	2007.41	15.5452	2007.41	15.5452	98.7893
95	51.5118	5745.39	0.980505	7.80605	0.624919	6.79399	2.28924	0.38464	2.20229	0.962019	2097.92	39.4381	2084.94	20.2649	2072.13	11.0087	2072.13	11.0087	101.245
92	76.8389	8284.98	2.40491	7.77166	0.999646	6.65925	2.5238	0.375351	2.31738	0.918213	2054.53	40.7705	2067.23	22.284	2079.9	17.5961	2079.9	17.5961	98.7802
25	18.7074	2417.31	1.40843	7.76105	1.2394	6.39743	3.70792	0.360102	3.49464	0.942481	1982.66	59.6468	2031.92	32.5712	2082.3	21.8113	2082.3	21.8113	95.2145
70	80.7195	8085.15	1.64374	7.76042	0.60841	6.51295	1.87153	0.366574	1.76987	0.945684	2013.26	30.6049	2047.65	16.4752	2082.45	10.7054	2082.45	10.7054	96.6775
57	158.868	17842.8	2.02844	7.75484	0.793398	6.52438	2.85597	0.366954	2.74356	0.960638	2015.05	47.4785	2049.19	25.1502	2083.71	13.9591	2083.71	13.9591	96.7049
11	118.413	14341.5	2.04513	7.72828	0.972025	6.91265	2.33561	0.387459	2.12373	0.909284	2111.03	38.2321	2100.28	20.7211	2089.75	17.0908	2089.75	17.0908	101.019
38	70.6405	8333.82	1.63384	7.72106	0.808909	6.52733	2.40106	0.36552	2.2607	0.941542	2008.29	39.0104	2049.59	21.1442	2091.39	14.2219	2091.39	14.2219	96.0263
1	72.8955	8251.4	2.14932	7.71804	0.519205	6.61407	1.51448	0.370233	1.4227	0.939399	2030.49	24.7808	2061.23	13.3589	2092.08	9.12762	2092.08	9.12762	97.0563
93	99.9123	11119.8	1.39654	7.6789	0.84752	6.96717	1.64292	0.38802	1.40744	0.856672	2113.64	25.3635	2107.25	14.5891	2101.01	14.8823	2101.01	14.8823	100.601
28	11.8421	1729.83	6.26648	6.6248	0.569459	8.79415	2.68301	0.422538	2.62188	0.977216	2271.99	50.2044	2316.89	24.4661	2356.68	9.72808	2356.68	9.72808	96.4065
33	154.782	15139.9	1.07099	6.42705	0.853082	9.34626	1.56237	0.43566	1.30891	0.837772	2331.18	25.605	2372.57	14.3316	2408.3	14.4957	2408.3	14.4957	96.7978
58	147.046	19202.4	1.69067	6.30766	0.625986	9.80368	2.63673	0.448494	2.56134	0.971409	2388.55	51.1252	2416.5	24.2994	2440.11	10.6024	2440.11	10.6024	97.8873
83	138.101	20888.1	1.80664	6.22325	0.519321	10.2118	1.47624	0.46091	1.38188	0.93608	2443.58	28.105	2454.14	13.6534	2462.9	8.77263	2462.9	8.77263	99.2154
79	37.2516	5335.39	3.45897	6.15218	0.700979	10.1282	3.05406	0.45192	2.97253	0.973303	2403.78	59.6452	2446.55	28.2311	2482.28	11.8223	2482.28	11.8223	96.8376
23	133.786	21476.8	2.5697	5.85421	0.73127	11.0768	1.65119	0.470305	1.48043	0.896584	2484.9	30.5268	2529.61	15.3788	2565.65	12.232	2565.65	12.232	96.8525
88	154.042	21254.7	0.933331	5.75629	0.861849	11.8414	1.7856	0.494361	1.56384	0.875804	2589.51	33.3504	2591.94	16.7203	2593.83	14.3736	2593.83	14.3736	99.8337
26	81.3913	12172.9	2.8584	5.64787	0.521223	11.4458	3.21105	0.468846	3.16846	0.986738	2478.5	65.1981	2560.17	29.9934	2625.49	8.66801	2625.49	8.66801	94.4013
17	209.995	34516.7	1.88554	5.48829	0.688297	12.7368	2.33277	0.506988	2.22892	0.95548	2643.76	48.3402	2660.39	21.9657	2673.04	11.3949	2673.04	11.3949	98.9045
19	41.9369	6644.18	3.40045	5.45684	0.979022	13.8135	2.33154	0.546691	2.11603	0.907569	2811.4	48.2156	2737	22.0794	2682.55	16.1905	2682.55	16.1905	104.803
35	27.7268	4059.28	3.47121	5.44984	0.735113	12.9946	0.990641	0.513626	0.664063	0.670336	2672.09	14.5263	2679.27	9.34031	2684.67	12.1534	2684.67	12.1534	99.5312
63	53.7234	8488.57	2.72603	5.42258	0.779578	12.8868	3.05812	0.506817	2.95708	0.966962	2643.03	64.119	2671.41	28.8233	2692.96	12.8789	2692.96	12.8789	98.1459
66	53.7596	7374.3	1.75623	5.36023	0.630748	13.326	1.5034	0.518063	1.36468	0.907733	2690.96	30.0225	2703.03	14.2006	2712.05	10.4041	2712.05	10.4041	99.2224
80	65.0687	9615.61	0.889133	5.25023	0.709832	13.5389	2.43378	0.515537	2.32796	0.956522	2680.22	51.0501	2718	23.0164	2746.19	11.6685	2746.19	11.6685	97.598
3	81.4111	13893	2.14194	5.22273	0.948145	13.5731	1.39892	0.514132	1.02859	0.735274	2674.24	22.515	2720.39	13.2304	2754.82	15.5781	2754.82	15.5781	97.075
60	202.356	28919.2	1.1258	5.11058	0.88645	14.4345	2.47645	0.535021	2.31236	0.93374	2762.57	51.9565	2778.7	23.5205	2790.42	14.5136	2790.42	14.5136	99.002
Rejected Analyses: >10% discordant; >5% rev discordant; >10% 2s err; grains <500 Ma-evaluated by 1s err concordance; 1200 Ma cutoff
12	2371.33	1052.37	0.788094	4.81651	3.00091	0.960308	12.639	0.0335461	12.2776	0.971404	212.704	25.6889	683.456	62.9484	2887.04	48.7249	212.704	25.6889	7.36755
14	146.719	3060.89	1.40974	11.6513	0.811863	1.29052	2.33715	0.109053	2.19161	0.937727	667.248	13.8921	841.53	13.3713	1334.28	15.7016	1334.28	15.7016	50.0081
99	119.296	8495.46	0.536795	9.22764	0.886467	3.50095	3.89576	0.234301	3.79357	0.973767	1357	46.4224	1527.43	30.7778	1772.18	16.1832	1772.18	16.1832	76.5725
2	208.594	14212.3	1.06337	8.96175	0.775832	3.83775	5.74697	0.249441	5.69436	0.990846	1435.59	73.2882	1600.7	46.3237	1825.38	14.0709	1825.38	14.0709	78.6463
51	130.932	5493.93	1.14016	8.69515	0.564908	2.81116	4.53412	0.177281	4.49879	0.992208	1052.1	43.6719	1358.51	33.9714	1879.97	10.1792	1879.97	10.1792	55.9637
98	52.1617	4642.63	1.24637	7.31844	0.615743	5.65102	4.90311	0.299947	4.8643	0.992083	1691.04	72.3561	1923.92	42.3245	2185.05	10.7111	2185.05	10.7111	77.3917
61	157.198	10486.9	1.927	6.89472	0.521727	6.12393	5.1148	0.306229	5.08812	0.994784	1722.12	76.8994	1993.66	44.6734	2288.22	8.97698	2288.22	8.97698	75.2603
52	280.263	11188.3	1.14084	5.86619	0.641537	5.74088	5.26986	0.244249	5.23067	0.992562	1408.75	66.1937	1937.54	45.6019	2562.23	10.7316	2562.23	10.7316	54.9813
94	206.177	12328.5	1.18299	5.5552	0.516956	7.12177	7.31119	0.286937	7.29289	0.997497	1626.21	104.83	2126.77	65.1855	2652.96	8.57479	2652.96	8.57479	61.2978
75	620.075	7460.69	1.61417	5.20979	4.09049	5.46837	21.1877	0.206622	20.7891	0.981187	1210.8	229.584	1895.64	183.86	2758.9	67.2042	2758.9	67.2042	43.8869
90	154.643	19717	1.61477	4.85591	0.88145	11.8832	4.73226	0.418507	4.64945	0.9825	2253.7	88.4338	2595.24	44.3491	2873.81	14.3236	2873.81	14.3236	78.422
29	182.255	15814.9	1.3975	3.69851	1.14189	15.9723	4.052	0.428442	3.88777	0.95947	2298.69	75.1741	2875.14	38.738	3308.22	17.9073	3308.22	17.9073	69.4842
08ACH018, Neruokpuk Formation						(n=96/100)
87	295.873	102189	2.64531	15.9318	1.68091	0.962953	1.7569	0.111267	0.511113	0.290918	680.105	3.29902	684.825	8.7515	700.347	35.7943	680.105	3.29902	97.1097
48	397.362	248173	4.80548	13.1551	0.646524	1.97545	0.998568	0.188477	0.761015	0.762106	1113.12	7.78	1107.17	6.73174	1095.52	12.9319	1113.12	7.78	101.607
1	74.7869	50159.4	0.91029	12.6465	1.62694	2.21164	2.56873	0.202854	1.98783	0.773855	1190.63	21.6107	1184.73	17.9631	1173.98	32.1843	1190.63	21.6107	101.418
35	55.7184	43347.4	2.85849	12.5469	3.23381	2.34316	3.51643	0.213225	1.38122	0.39279	1245.98	15.6487	1225.48	25.0302	1189.61	63.844	1245.98	15.6487	104.738
16	93.5279	89667.6	2.65798	11.74	1.79453	2.74423	2.26517	0.233661	1.38227	0.610228	1353.66	16.8773	1340.52	16.8589	1319.6	34.7812	1319.6	34.7812	102.581
71	49.054	3489.77	1.75899	10.7694	3.46047	3.2482	3.79113	0.253706	1.54849	0.408451	1457.56	20.2005	1468.75	29.4413	1484.94	65.5793	1484.94	65.5793	98.1565
7	206.676	680919	2.18861	9.92497	0.464981	4.0687	0.7937	0.292876	0.643236	0.810427	1655.88	9.39323	1648.05	6.46921	1638.06	8.63432	1638.06	8.63432	101.088
30	35.9378	29952.6	0.646429	9.0762	2.12183	5.10796	2.62441	0.336241	1.54446	0.588498	1868.56	25.0531	1837.43	22.2886	1802.33	38.5965	1802.33	38.5965	103.675
32	130.943	139637	2.14881	9.02878	0.614211	5.0113	0.803774	0.328154	0.518458	0.645029	1829.43	8.25774	1821.23	6.80382	1811.86	11.1576	1811.86	11.1576	100.97
38	47.3635	45496.1	1.59011	9.00112	2.0892	5.01139	2.40854	0.327155	1.19846	0.497589	1824.58	19.0448	1821.25	20.3904	1817.43	37.9307	1817.43	37.9307	100.394
98	32.2416	90888.9	0.555378	8.98494	1.54683	5.04259	2.05383	0.3286	1.35112	0.657855	1831.59	21.5421	1826.5	17.4047	1820.69	28.0732	1820.69	28.0732	100.599
15	39.7259	42435.2	0.611618	8.97881	1.76853	5.09517	1.98652	0.3318	0.904753	0.455446	1847.1	14.5307	1835.3	16.863	1821.93	32.0909	1821.93	32.0909	101.382
21	61.476	419385	1.21172	8.96318	0.90122	5.15521	2.77	0.335125	2.61929	0.945593	1863.18	42.3831	1845.25	23.5608	1825.09	16.346	1825.09	16.346	102.087
25	68.7982	47786.6	1.00906	8.94186	1.22023	5.29549	3.03029	0.343425	2.77375	0.915342	1903.13	45.71	1868.14	25.8872	1829.41	22.1214	1829.41	22.1214	104.03
37	149.158	176758	1.35935	8.9369	0.392152	5.10371	0.950126	0.330805	0.865422	0.91085	1842.28	13.8677	1836.72	8.067	1830.41	7.10879	1830.41	7.10879	100.648
52	82.591	79740.9	1.03922	8.9351	0.712342	5.12233	1.83124	0.331945	1.68701	0.92124	1847.8	27.1031	1839.82	15.5582	1830.78	12.9126	1830.78	12.9126	100.93
13	45.965	70514	0.86533	8.93348	1.2622	5.22939	2.53797	0.338821	2.20185	0.867563	1881	35.9218	1857.42	21.6366	1831.11	22.8758	1831.11	22.8758	102.724
58	127.353	120410	1.11608	8.92202	0.705403	5.17956	1.20618	0.335162	0.9784	0.811159	1863.35	15.8327	1849.26	10.2657	1833.44	12.7827	1833.44	12.7827	101.632
66	57.3568	70787.7	1.25474	8.9171	1.23501	5.16828	1.79979	0.334248	1.3092	0.727418	1858.94	21.1426	1847.41	15.3133	1834.43	22.3738	1834.43	22.3738	101.336
43	116.307	85948.2	1.25564	8.91319	0.672176	5.1203	1.23953	0.330999	1.04145	0.840196	1843.22	16.6957	1839.48	10.5299	1835.23	12.1779	1835.23	12.1779	100.436
62	74.4222	104737	2.011	8.9101	0.884095	5.18319	1.22395	0.334949	0.846426	0.691551	1862.32	13.6906	1849.86	10.4182	1835.86	16.0161	1835.86	16.0161	101.442
8	68.3285	66916.4	4.06469	8.90523	0.820278	5.20732	2.14157	0.336324	1.97825	0.923737	1868.96	32.0959	1853.81	18.244	1836.85	14.8582	1836.85	14.8582	101.748
54	75.0732	115975	0.913643	8.89709	1.12795	5.09318	1.55798	0.328651	1.07472	0.689819	1831.84	17.1372	1834.97	13.2239	1838.5	20.4256	1838.5	20.4256	99.6377
63	119.492	56456.3	1.17115	8.89451	0.453152	5.17138	0.947833	0.333601	0.83249	0.878309	1855.81	13.4245	1847.92	8.06482	1839.03	8.20594	1839.03	8.20594	100.913
45	54.9636	30842.3	0.995098	8.89052	1.84899	5.17009	2.15431	0.333368	1.10556	0.513187	1854.69	17.8187	1847.71	18.3312	1839.84	33.4784	1839.84	33.4784	100.807
67	180.319	188534	1.5429	8.88905	0.54276	5.14087	0.875966	0.331429	0.687552	0.784907	1845.3	11.0331	1842.89	7.44615	1840.14	9.82731	1840.14	9.82731	100.281
73	133.923	112301	1.87207	8.88413	0.696499	5.2643	0.878702	0.339199	0.53573	0.609683	1882.81	8.74729	1863.09	7.49803	1841.14	12.6094	1841.14	12.6094	102.263
5	139.734	84715.5	2.00394	8.87735	0.627984	5.18817	1.45055	0.334038	1.30757	0.901429	1857.93	21.1064	1850.68	12.3492	1842.53	11.3652	1842.53	11.3652	100.836
27	103.842	71379.7	1.02266	8.87674	0.734819	5.20739	1.44989	0.335253	1.24989	0.862057	1863.79	20.2302	1853.83	12.3509	1842.65	13.2989	1842.65	13.2989	101.147
100	122.122	115203	1.7862	8.87638	0.81796	5.20992	1.22856	0.335402	0.916683	0.746142	1864.51	14.842	1854.24	10.4662	1842.72	14.8037	1842.72	14.8037	101.182
44	75.2141	68179.9	1.36288	8.87508	0.972202	5.16104	1.75905	0.332207	1.46597	0.833389	1849.07	23.5658	1846.22	14.9631	1842.99	17.5952	1842.99	17.5952	100.33
91	78.4079	85772	1.97407	8.86564	0.720085	5.14249	1.78281	0.33066	1.63092	0.914801	1841.58	26.1257	1843.15	15.1564	1844.91	13.0286	1844.91	13.0286	99.8193
74	139.437	100714	1.47534	8.86473	0.703892	5.21408	1.1304	0.335229	0.884494	0.782464	1863.68	14.3153	1854.92	9.63107	1845.1	12.7353	1845.1	12.7353	101.007
99	114.549	150429	1.34045	8.8642	0.410483	5.19827	1.30376	0.334193	1.23746	0.949143	1858.67	19.9815	1852.33	11.1028	1845.21	7.42766	1845.21	7.42766	100.73
80	90.1022	112456	2.19417	8.86305	0.997592	5.19971	2.11209	0.334242	1.86164	0.881424	1858.91	30.0638	1852.57	17.9885	1845.44	18.0494	1845.44	18.0494	100.73
70	316.566	187722	1.29986	8.86026	0.237027	5.15766	0.794786	0.331435	0.758619	0.954495	1845.33	12.1736	1845.66	6.75964	1846.01	4.28855	1846.01	4.28855	99.9631
96	183.319	158914	2.05687	8.85395	0.416912	5.28174	0.63932	0.339166	0.48468	0.758118	1882.66	7.9132	1865.92	5.4582	1847.3	7.54017	1847.3	7.54017	101.914
57	124.263	83650.8	2.04293	8.85018	0.468051	5.17797	0.775697	0.332361	0.618574	0.797443	1849.82	9.94714	1849	6.60148	1848.07	8.46453	1848.07	8.46453	100.094
2	101.688	196217	0.970659	8.84297	0.672851	5.25018	1.69828	0.336722	1.55931	0.918166	1870.88	25.3211	1860.8	14.4861	1849.55	12.167	1849.55	12.167	101.153
65	51.9491	50338.3	1.29496	8.82552	1.60614	5.16699	2.00688	0.330732	1.20327	0.599572	1841.93	19.2782	1847.2	17.0748	1853.12	29.0353	1853.12	29.0353	99.3963
34	183.254	69709.3	1.13974	8.60477	0.391964	5.57339	1.43403	0.347822	1.37942	0.96192	1924.19	22.9478	1912	12.3464	1898.78	7.04708	1898.78	7.04708	101.339
78	66.7353	69729.9	3.83093	8.59947	1.14592	5.57601	1.99697	0.347771	1.63546	0.818973	1923.95	27.2044	1912.4	17.1951	1899.88	20.5983	1899.88	20.5983	101.267
72	67.4896	165485	0.786033	8.5895	1.39867	5.68058	1.65977	0.353883	0.893611	0.538396	1953.11	15.0573	1928.42	14.3313	1901.97	25.134	1901.97	25.134	102.689
19	65.6741	93593.6	1.28625	8.58793	1.25948	5.60283	2.42933	0.348975	2.07734	0.855109	1929.7	34.6435	1916.53	20.9342	1902.3	22.6333	1902.3	22.6333	101.441
3	108.395	69822	0.648002	8.58429	0.555238	5.6728	1.53454	0.353183	1.43057	0.932245	1949.78	24.0698	1927.24	13.2471	1903.06	9.97749	1903.06	9.97749	102.455
24	270.283	214168	1.42727	8.58051	0.282288	5.7119	1.52118	0.355461	1.49475	0.982631	1960.62	25.2694	1933.17	13.1452	1903.85	5.07213	1903.85	5.07213	102.982
41	116.846	131872	0.577029	8.56902	0.814145	5.63129	0.950203	0.349975	0.489953	0.51563	1934.48	8.18812	1920.9	8.19343	1906.26	14.6245	1906.26	14.6245	101.481
29	124.409	101290	2.06663	8.55536	0.498477	5.65372	2.10921	0.35081	2.04946	0.971672	1938.46	34.3115	1924.33	18.1998	1909.12	8.95098	1909.12	8.95098	101.537
69	68.8742	130354	1.48286	8.52565	1.38895	5.66074	1.6974	0.350026	0.975699	0.574819	1934.72	16.3077	1925.4	14.6486	1915.37	24.9216	1915.37	24.9216	101.011
28	59.6472	91223.8	1.08239	8.52053	0.920676	5.8137	1.45521	0.359267	1.12694	0.774417	1978.7	19.2014	1948.45	12.6081	1916.44	16.5162	1916.44	16.5162	103.249
83	117.91	295370	1.07517	8.51004	0.762361	5.70718	1.33422	0.352251	1.09496	0.820678	1945.34	18.3871	1932.46	11.5281	1918.65	13.6721	1918.65	13.6721	101.391
18	207.883	189946	2.7879	8.49352	0.44161	5.67838	1.25116	0.349793	1.17064	0.935639	1933.61	19.5563	1928.09	10.8022	1922.14	7.91556	1922.14	7.91556	100.597
94	58.1558	47599.8	1.2967	8.49348	1.31865	5.5851	1.5556	0.344045	0.825259	0.530508	1906.1	13.6179	1913.8	13.3974	1922.15	23.6409	1922.15	23.6409	99.1652
26	78.5145	76884.4	0.732677	8.48764	0.921581	5.69082	1.2168	0.350317	0.794533	0.652971	1936.11	13.2879	1929.98	10.5089	1923.38	16.5188	1923.38	16.5188	100.662
93	200.929	223267	2.49198	8.45895	0.513235	5.67514	1.10732	0.34817	0.981193	0.8861	1925.85	16.335	1927.59	9.5594	1929.45	9.19183	1929.45	9.19183	99.8139
75	129.468	42086.7	0.579559	8.45752	0.706444	5.57799	1.01126	0.342152	0.723589	0.715533	1897.02	11.8913	1912.71	8.70738	1929.75	12.6525	1929.75	12.6525	98.3038
97	57.6812	87760	0.939211	8.44293	1.63422	5.76113	2.10422	0.352776	1.32555	0.629949	1947.84	22.2839	1940.59	18.2078	1932.84	29.2625	1932.84	29.2625	100.776
86	83.1218	99154.6	0.421088	8.42225	0.561345	5.68499	1.09027	0.347261	0.934649	0.857268	1921.51	15.53	1929.09	9.41463	1937.23	10.0464	1937.23	10.0464	99.1884
11	49.3316	28307	0.95951	7.79853	1.03552	6.74096	3.15295	0.38127	2.97806	0.944529	2082.22	52.9926	2078.01	27.8858	2073.82	18.2402	2073.82	18.2402	100.405
61	46.8393	47112.2	0.658163	7.68599	1.21328	6.83871	2.92275	0.381217	2.65903	0.909769	2081.97	47.3108	2090.75	25.8968	2099.39	21.3103	2099.39	21.3103	99.1701
22	44.1172	62961.9	2.08494	7.65059	1.37395	7.01622	2.4517	0.389311	2.03053	0.828215	2119.63	36.6801	2113.49	21.792	2107.5	24.1111	2107.5	24.1111	100.576
17	77.2455	78671.4	2.48095	7.44088	0.388314	7.58879	1.51465	0.409539	1.46403	0.966578	2212.81	27.4213	2183.54	13.5897	2156.13	6.77794	2156.13	6.77794	102.629
85	29.5264	56140.8	0.681326	7.32606	2.30879	7.62328	2.56231	0.405052	1.11128	0.4337	2192.26	20.6519	2187.61	23.0041	2183.23	40.1797	2183.23	40.1797	100.413
40	36.3897	66800.8	1.79599	7.23867	2.75166	8.12412	5.95006	0.426515	5.27557	0.88664	2289.99	101.691	2244.93	53.8448	2204.09	47.7816	2204.09	47.7816	103.897
6	106.83	100280	2.77136	7.15173	1.7656	7.61865	3.43176	0.395173	2.94273	0.857498	2146.78	53.7326	2187.06	30.8119	2225.04	30.5861	2225.04	30.5861	96.4826
39	155.207	194123	1.62725	7.09387	0.842318	7.77648	1.01689	0.400096	0.569715	0.56025	2169.48	10.495	2205.49	9.14914	2239.1	14.5675	2239.1	14.5675	96.8907
88	217.993	102888	1.61637	6.92668	0.37692	8.47399	1.55443	0.425708	1.50804	0.970156	2286.34	29.0278	2283.14	14.1183	2280.26	6.49092	2280.26	6.49092	100.267
14	96.3979	63168.3	1.30451	6.86641	0.530602	8.74431	1.59429	0.435465	1.5034	0.942992	2330.31	29.4006	2311.71	14.5278	2295.3	9.12025	2295.3	9.12025	101.525
55	19.4772	18731	0.207018	6.85695	1.10667	8.67777	1.91187	0.431557	1.55902	0.815441	2312.73	30.2972	2304.75	17.4086	2297.67	19.0206	2297.67	19.0206	100.656
23	175.484	128896	1.30026	6.8567	0.935571	8.24808	1.38016	0.410173	1.01467	0.735182	2215.71	19.0257	2258.63	12.4993	2297.73	16.0792	2297.73	16.0792	96.4304
84	26.518	51517.5	1.1046	6.77391	1.58489	8.90618	4.08431	0.437552	3.76427	0.921641	2339.67	73.8624	2328.43	37.3017	2318.58	27.1792	2318.58	27.1792	100.91
10	37.8505	55549	0.80715	6.75666	1.82768	9.26244	3.44431	0.453895	2.91939	0.847598	2412.55	58.755	2364.31	31.5752	2322.96	31.3299	2322.96	31.3299	103.857
82	41.2	60478	1.31491	6.74195	1.37014	8.71592	2.85155	0.426184	2.50081	0.877	2288.49	48.1758	2308.74	25.9798	2326.69	23.478	2326.69	23.478	98.3583
60	55.7821	49656.4	1.44894	6.7344	0.729357	9.09552	1.69921	0.444248	1.53471	0.903194	2369.63	30.4322	2347.66	15.5457	2328.61	12.4961	2328.61	12.4961	101.762
12	52.3788	89096	1.54829	6.69667	0.935959	9.1845	2.5302	0.446081	2.35072	0.929066	2377.8	46.7464	2356.57	23.1727	2338.23	16.0173	2338.23	16.0173	101.692
95	82.4122	81337.9	1.02373	6.6911	0.998708	9.01573	2.74051	0.437519	2.55205	0.931233	2339.52	50.0726	2339.6	25.0535	2339.66	17.0889	2339.66	17.0889	99.9944
90	81.1425	15583.5	1.65481	6.65771	1.55743	8.8631	2.6445	0.427966	2.13723	0.808182	2296.54	41.2922	2324.01	24.1339	2348.21	26.6278	2348.21	26.6278	97.7997
56	109.765	141030	1.5307	6.62977	0.498726	9.23268	0.897921	0.443941	0.746682	0.831568	2368.26	14.7989	2361.36	8.22652	2355.4	8.52089	2355.4	8.52089	100.546
81	118.717	204180	1.51888	6.59742	0.489157	9.39742	2.54568	0.449657	2.49824	0.981365	2393.73	49.9548	2377.58	23.3665	2363.75	8.35006	2363.75	8.35006	101.268
20	171.566	179126	1.85199	6.59495	0.339352	9.3176	5.50281	0.445671	5.49233	0.998097	2375.98	109.159	2369.75	50.5007	2364.39	5.79244	2364.39	5.79244	100.49
33	131.457	118391	1.66637	6.45852	0.891489	9.35523	1.13006	0.438214	0.694471	0.614542	2342.64	13.6407	2373.45	10.3667	2400	15.1614	2400	15.1614	97.6099
46	77.9439	100891	2.40982	6.27022	1.03809	10.282	1.6751	0.467582	1.31466	0.784827	2472.95	27.0017	2460.48	15.5023	2450.18	17.5617	2450.18	17.5617	100.929
50	20.5773	25772.5	1.38623	6.12433	1.22772	10.8608	2.49362	0.482411	2.17045	0.870401	2537.76	45.5327	2511.28	23.189	2489.93	20.6876	2489.93	20.6876	101.921
79	60.043	126889	1.56644	6.10039	0.653124	10.9549	1.12479	0.484691	0.915735	0.814142	2547.67	19.2716	2519.31	10.4659	2496.53	10.9993	2496.53	10.9993	102.048
4	148.105	390971	1.97751	6.09	0.330419	10.659	1.43077	0.470796	1.3921	0.972969	2487.05	28.7257	2493.86	13.2825	2499.4	5.56295	2499.4	5.56295	99.5058
68	349.217	159149	2.18634	5.86659	0.0980958	11.3937	0.795886	0.484786	0.789817	0.992375	2548.08	16.6239	2555.91	7.42937	2562.12	1.64141	2562.12	1.64141	99.452
51	72.8441	84964.1	1.97306	5.86593	0.433703	11.6213	2.79597	0.494413	2.76213	0.987896	2589.74	58.9105	2574.39	26.1462	2562.31	7.25692	2562.31	7.25692	101.071
47	79.5847	114808	1.35038	5.81241	0.37738	11.9761	2.21283	0.504859	2.18041	0.98535	2634.64	47.1561	2602.54	20.74	2577.63	6.30494	2577.63	6.30494	102.212
31	110.888	168042	1.36552	5.72553	0.244661	11.8123	0.951792	0.490511	0.919809	0.966397	2572.89	19.5133	2589.64	8.91026	2602.76	4.07775	2602.76	4.07775	98.8525
77	79.3813	93883.5	1.11194	5.70962	0.380942	12.2565	0.724537	0.507544	0.616309	0.850625	2646.13	13.3758	2624.25	6.80196	2607.39	6.34628	2607.39	6.34628	101.486
76	232.465	370802	3.83818	5.69978	0.157437	12.1064	0.691641	0.500464	0.673484	0.973748	2615.79	14.4808	2612.69	6.48706	2610.27	2.62206	2610.27	2.62206	100.212
53	28.3873	30761.5	1.10203	5.49852	0.654156	12.8795	2.4918	0.513624	2.4044	0.964925	2672.08	52.597	2670.88	23.4825	2669.96	10.8329	2669.96	10.8329	100.08
9	39.2623	92909.8	1.07671	5.47716	0.842575	13.1535	2.63768	0.522512	2.49948	0.947607	2709.83	55.2986	2690.73	24.8952	2676.4	13.9414	2676.4	13.9414	101.249
59	212.352	363105	0.80929	5.35416	0.164118	13.5946	1.02989	0.527907	1.01673	0.987221	2732.63	22.6457	2721.89	9.74113	2713.92	2.7066	2713.92	2.7066	100.689
49	72.8394	75975.7	1.30229	4.63725	0.901665	17.7297	2.75063	0.596294	2.59865	0.944746	3014.89	62.5788	2975.18	26.4442	2948.44	14.5572	2948.44	14.5572	102.254
36	276.101	10851.5	1.63751	5.7806	0.759088	12.0109	5.93222	0.503557	5.88346	0.991779	2629.07	127.039	2605.26	55.6609	2586.79	12.6679	2586.79	12.6679	101.634
Rejected Analyses: >10% discordant; >5% rev discordant; >10% 2s err; grains <500 Ma-evaluated by 1s err concordance; 1200 Ma cutoff
42	60.5724	100384	2.08404	5.75818	0.618216	12.6542	1.90317	0.52847	1.79996	0.945771	2735	40.1191	2654.26	17.9111	2593.28	10.3099	2593.28	10.3099	105.465
64	21.232	28912.2	0.744374	9.08522	6.04009	5.3929	7.46739	0.35535	4.39081	0.587998	1960.1	74.2143	1883.73	64.047	1800.52	109.985	1800.52	109.985	108.863
89	30.2007	47313.4	1.08845	8.55668	1.71487	6.04077	2.52914	0.374883	1.85896	0.73502	2052.34	32.6756	1981.74	22.0365	1908.85	30.7926	1908.85	30.7926	107.517
92	1.07453	2047.31	-18.5494	9.89211	82.806	4.61652	85.3078	0.33121	20.5085	0.240406	1844.24	329.22	1752.26	883.018	1644.22	212.164	1644.22	212.164	112.165
J1349, Neruokpuk Formation						(n=91/100)
42	153.627	51802.4	1.25045	12.9504	1.29375	1.99273	1.80804	0.187167	1.26302	0.698557	1106.01	12.8365	1113.05	12.2248	1126.8	25.7804	1106.01	12.8365	98.1551
87	58.9694	30327.1	2.46674	13.249	6.3421	1.97111	6.42338	0.189405	1.01863	0.158582	1118.15	10.4568	1105.69	43.2961	1081.24	127.352	1118.15	10.4568	103.414
45	171.009	82130.8	1.12004	12.585	1.34326	2.265	1.91871	0.206738	1.37007	0.714059	1211.41	15.1311	1201.46	13.5161	1183.63	26.563	1211.41	15.1311	102.347
17	91.2032	43043.8	2.1196	12.6553	3.55327	2.24232	3.63926	0.205811	0.786453	0.216103	1206.46	8.65328	1194.38	25.5609	1172.61	70.3446	1206.46	8.65328	102.887
61	296.111	126828	2.37787	11.5848	0.663858	2.83528	1.10383	0.238222	0.881887	0.798936	1377.45	10.9374	1364.92	8.28589	1345.35	12.819	1345.35	12.819	102.386
10	179.774	71866.6	2.4418	10.809	0.784246	3.18285	1.00191	0.249516	0.623518	0.622331	1435.98	8.02645	1453	7.74122	1477.98	14.8723	1477.98	14.8723	97.1582
89	201.692	251818	3.5241	10.6511	1.2644	3.31025	1.50205	0.255715	0.810833	0.539819	1467.88	10.6442	1483.47	11.7136	1505.82	23.8877	1505.82	23.8877	97.4803
28	98.5671	3267.96	1.30951	10.5374	2.37802	3.50863	2.54331	0.268144	0.901913	0.354622	1531.37	12.2937	1529.16	20.0992	1526.08	44.8121	1526.08	44.8121	100.347
30	109.673	67407.6	2.19855	10.4677	2.47567	3.54033	2.65257	0.268779	0.952468	0.359073	1534.6	13.007	1536.28	21.0047	1538.56	46.5746	1538.56	46.5746	99.7424
44	80.8836	86558.4	1.5154	9.6933	2.04879	4.23323	2.48176	0.297606	1.40057	0.564345	1679.43	20.7073	1680.49	20.3868	1681.79	37.8328	1681.79	37.8328	99.8592
19	235.988	187763	2.34165	9.15457	0.613349	4.80341	0.921314	0.318924	0.687475	0.74619	1784.47	10.7162	1785.5	7.74306	1786.68	11.1765	1786.68	11.1765	99.8764
7	44.4883	18376.2	1.02045	9.13375	3.90426	4.86749	4.12653	0.322443	1.33603	0.323767	1801.65	20.9997	1796.65	34.7726	1790.83	71.1389	1790.83	71.1389	100.604
18	35.2791	32117.9	0.53663	9.1158	4.49689	4.97873	5.10256	0.329164	2.41124	0.472556	1834.33	38.4944	1815.72	43.1707	1794.41	81.9126	1794.41	81.9126	102.225
38	26.8073	9240.75	0.595697	9.11	3.72162	4.99108	4.16583	0.32977	1.87181	0.449324	1837.27	29.9238	1817.81	35.2529	1795.57	67.7687	1795.57	67.7687	102.322
3	266.155	31638.9	1.70924	9.10234	0.36321	4.42938	1.22219	0.292412	1.16697	0.954822	1653.57	17.0206	1717.85	10.1246	1797.1	6.611	1797.1	6.611	92.0134
54	54.9038	35674.7	0.678888	9.03276	2.80029	5.03521	3.13397	0.329866	1.40717	0.449007	1837.73	22.5008	1825.26	26.5552	1811.05	50.8871	1811.05	50.8871	101.473
73	152.964	83248.6	1.19397	8.99566	0.618271	4.99548	0.895173	0.325919	0.64736	0.723168	1818.57	10.2579	1818.56	7.57353	1818.53	11.2222	1818.53	11.2222	100.002
90	115.161	70073.5	2.76827	8.93972	1.03118	4.81789	2.55432	0.312377	2.33693	0.914891	1752.4	35.8583	1788.03	21.4814	1829.84	18.6927	1829.84	18.6927	95.7676
68	146.272	108281	1.52875	8.91687	0.882974	5.06141	0.995754	0.327328	0.460307	0.46227	1825.42	7.31764	1829.66	8.44286	1834.48	15.9985	1834.48	15.9985	99.5059
65	73.4071	47938	0.886487	8.91672	0.79225	5.17086	1.66466	0.3344	1.46405	0.879487	1859.67	23.6513	1847.83	14.1645	1834.51	14.3546	1834.51	14.3546	101.372
41	146.257	89922.4	1.61456	8.91074	0.801913	5.13069	1.7622	0.33158	1.56917	0.89046	1846.04	25.1891	1841.2	14.9756	1835.73	14.5275	1835.73	14.5275	100.562
83	107.576	84128.8	1.10783	8.90905	0.833379	5.17704	1.29527	0.334512	0.99156	0.765527	1860.21	16.0224	1848.85	11.0232	1836.07	15.097	1836.07	15.097	101.315
63	191.605	128588	2.81237	8.90164	0.681417	5.19446	1.07607	0.335359	0.832822	0.77395	1864.3	13.4829	1851.71	9.16259	1837.58	12.3418	1837.58	12.3418	101.454
76	72.9733	85159.2	0.616357	8.88055	1.49429	5.15879	1.66993	0.332266	0.745493	0.446422	1849.36	11.9855	1845.84	14.2039	1841.87	27.0479	1841.87	27.0479	100.406
26	47.7598	44391.8	4.75672	8.88029	3.07867	5.22784	3.30623	0.336704	1.2054	0.364583	1870.79	19.5732	1857.17	28.1877	1841.92	55.7385	1841.92	55.7385	101.567
15	40.7245	22733.1	0.868339	8.8696	2.30167	5.19346	2.7444	0.334087	1.49467	0.544626	1858.16	24.1291	1851.54	23.371	1844.11	41.6561	1844.11	41.6561	100.762
9	109.02	28049.4	2.22465	8.85962	0.82734	5.03719	0.926826	0.32367	0.417751	0.450733	1807.63	6.58504	1825.6	7.85218	1846.14	14.9673	1846.14	14.9673	97.9137
29	135.354	102749	1.48775	8.85845	1.11449	5.22014	1.36624	0.335381	0.79027	0.578426	1864.41	12.7946	1855.91	11.6428	1846.38	20.1626	1846.38	20.1626	100.976
53	23.7722	31141.8	1.3872	8.82792	4.83993	5.32572	5.40517	0.340985	2.40643	0.44521	1891.41	39.4466	1873	46.2389	1852.63	87.5433	1852.63	87.5433	102.093
88	202.631	109102	4.45334	8.82654	0.486622	5.19884	0.739576	0.33281	0.55693	0.75304	1851.98	8.96493	1852.43	6.29817	1852.91	8.79534	1852.91	8.79534	99.9501
98	123.028	87876.3	1.14289	8.79616	1.13141	5.12681	1.4849	0.327068	0.961685	0.647644	1824.16	15.2791	1840.56	12.6172	1859.14	20.4371	1859.14	20.4371	98.1186
14	212.851	121888	1.33819	8.79472	0.554354	5.19511	1.22975	0.331372	1.09771	0.892631	1845.03	17.6126	1851.82	10.4714	1859.43	10.012	1859.43	10.012	99.2253
79	66.1597	58272.1	1.61252	8.78572	1.86839	5.27423	2.02606	0.336074	0.783592	0.386757	1867.76	12.7061	1864.7	17.2951	1861.28	33.742	1861.28	33.742	100.348
27	78.7404	38792.1	1.03635	8.77197	1.47487	5.29592	3.06716	0.336928	2.68928	0.876798	1871.87	43.6908	1868.2	26.2026	1864.11	26.6244	1864.11	26.6244	100.417
21	59.627	34484.9	1.19964	8.76263	1.19131	5.23844	1.36715	0.332916	0.670722	0.4906	1852.5	10.7992	1858.89	11.6571	1866.03	21.5014	1866.03	21.5014	99.2748
74	56.3679	10038.6	0.730341	8.67387	1.77038	5.52975	2.13196	0.347871	1.18786	0.557168	1924.42	19.7631	1905.23	18.3344	1884.39	31.8828	1884.39	31.8828	102.125
59	50.2954	44443.3	1.05957	8.60467	1.2091	5.56723	1.32747	0.347434	0.547961	0.412784	1922.33	9.1082	1911.04	11.427	1898.8	21.7369	1898.8	21.7369	101.24
69	110.811	176614	1.65526	8.57208	0.936627	5.6487	1.07035	0.351183	0.518059	0.484007	1940.24	8.67994	1923.56	9.2338	1905.62	16.8241	1905.62	16.8241	101.817
46	108.224	87902.4	1.14127	8.55496	0.889444	5.60227	2.34229	0.347601	2.16684	0.925096	1923.13	36.0304	1916.45	20.1836	1909.21	15.9715	1909.21	15.9715	100.729
40	161.945	143472	5.41866	8.50101	0.807099	5.69973	1.095	0.351418	0.740005	0.675806	1941.36	12.4047	1931.33	9.45915	1920.56	14.4713	1920.56	14.4713	101.083
100	58.4704	47572.9	1.05126	8.49916	2.004	5.66618	2.28003	0.349273	1.08744	0.476943	1931.13	18.1465	1926.23	19.6806	1920.95	35.9342	1920.95	35.9342	100.53
85	299.461	356583	1.29532	8.49329	0.650299	5.64675	0.825107	0.347835	0.507851	0.615497	1924.25	8.44872	1923.27	7.11765	1922.19	11.6571	1922.19	11.6571	100.107
32	102.767	37155.9	0.574211	8.48751	0.993536	5.67665	1.54357	0.349439	1.18131	0.765311	1931.92	19.7198	1927.82	13.3265	1923.41	17.8087	1923.41	17.8087	100.442
86	48.9536	25390.6	0.500096	8.47455	1.67726	5.44976	2.03585	0.33496	1.15389	0.566788	1862.38	18.6642	1892.72	17.4684	1926.15	30.0573	1926.15	30.0573	96.6892
37	37.9988	21039.5	0.928129	8.46265	1.70359	5.7516	1.95681	0.353016	0.962764	0.492005	1948.98	16.1931	1939.16	16.9279	1928.66	30.52	1928.66	30.52	101.054
82	118.448	67150.1	1.69979	8.46118	0.630167	5.39536	1.158	0.331093	0.971525	0.838966	1843.68	15.5781	1884.12	9.91994	1928.97	11.2871	1928.97	11.2871	95.5782
97	39.6627	38661.8	0.96568	8.45732	3.29115	5.69368	3.62033	0.349241	1.50836	0.416636	1930.97	25.1687	1930.41	31.2783	1929.79	58.9636	1929.79	58.9636	100.061
51	55.6872	42310.5	0.473446	8.45247	1.26182	5.69208	1.73647	0.348942	1.19295	0.686998	1929.54	19.8931	1930.17	14.9982	1930.82	22.5987	1930.82	22.5987	99.934
57	44.6842	36540.9	1.21669	8.43846	1.24301	5.76155	2.61295	0.352615	2.29835	0.879602	1947.08	38.6249	1940.65	22.6113	1933.79	22.2538	1933.79	22.2538	100.687
56	45.013	63365	1.26631	8.43378	1.52193	5.65312	1.96618	0.345788	1.24482	0.633117	1914.45	20.6186	1924.24	16.9651	1934.78	27.2453	1934.78	27.2453	98.9493
66	292.482	460441	0.943365	8.41071	0.493393	5.76383	0.597694	0.351595	0.337344	0.564409	1942.21	5.65701	1941	5.17167	1939.68	8.82771	1939.68	8.82771	100.13
92	263.362	322752	1.2078	8.33002	0.220233	5.84854	0.66701	0.35334	0.629603	0.943918	1950.53	10.5967	1953.63	5.78384	1956.91	3.93232	1956.91	3.93232	99.6737
75	125.036	87655.9	4.68814	8.18711	1.08574	6.06896	2.19621	0.360366	1.90906	0.86925	1983.91	32.6008	1985.8	19.1476	1987.75	19.3152	1987.75	19.3152	99.8066
70	226.744	85532	2.68294	8.16503	0.403444	6.00346	0.593858	0.355515	0.435776	0.733805	1960.88	7.36777	1976.35	5.16899	1992.56	7.17372	1992.56	7.17372	98.4104
16	44.4662	21267	1.0623	8.12708	2.39678	6.08418	3.37799	0.35862	2.38039	0.704677	1975.63	40.5051	1987.98	29.4661	2000.83	42.577	2000.83	42.577	98.7405
60	93.0749	118516	2.14152	8.12524	0.674902	6.27415	1.13205	0.369734	0.908867	0.802852	2028.15	15.8151	2014.85	9.91473	2001.23	11.9866	2001.23	11.9866	101.345
94	80.8161	62602.6	1.49121	8.07198	1.58233	6.19254	1.78738	0.362533	0.83124	0.465061	1994.17	14.2576	2003.4	15.6267	2012.91	28.0672	2012.91	28.0672	99.0692
95	135.574	55778.1	1.38719	7.82281	0.816032	6.41134	1.07579	0.363756	0.701015	0.651627	1999.95	12.0537	2033.82	9.44981	2068.35	14.3824	2068.35	14.3824	96.6933
78	33.5345	21018.3	1.20093	7.79331	3.24375	6.7086	3.4881	0.379187	1.28255	0.367692	2072.48	22.7313	2073.75	30.8325	2075	57.1443	2075	57.1443	99.8787
71	88.516	181152	2.71599	7.78323	1.7172	6.24265	2.08674	0.352393	1.18562	0.568168	1946.02	19.9154	2010.45	18.2649	2077.28	30.2389	2077.28	30.2389	93.6811
72	125.633	83024.1	1.8643	7.77829	1.10536	6.60984	1.24029	0.372884	0.562587	0.453592	2042.96	9.85026	2060.66	10.9392	2078.4	19.4606	2078.4	19.4606	98.2947
4	181.868	257516	2.68567	7.77158	0.65519	6.71443	0.84697	0.378457	0.536736	0.633713	2069.07	9.49955	2074.52	7.48534	2079.92	11.532	2079.92	11.532	99.4786
62	92.7156	86102.7	1.81822	7.74836	0.887908	6.86412	1.56842	0.385739	1.29289	0.824326	2103.04	23.2003	2094.04	13.9013	2085.18	15.6196	2085.18	15.6196	100.856
20	106.389	176654	0.848101	7.67339	0.928229	6.90767	4.79926	0.38443	4.70864	0.981118	2096.95	84.2916	2099.64	42.5933	2102.27	16.2975	2102.27	16.2975	99.7465
31	126.696	87739.4	1.11128	7.67322	0.636229	6.9945	0.984181	0.389254	0.750883	0.762952	2119.37	13.5626	2110.73	8.74341	2102.31	11.1698	2102.31	11.1698	100.811
91	80.532	72901.3	2.06101	7.6617	1.11542	6.90309	1.63641	0.38359	1.19736	0.731698	2093.03	21.3995	2099.05	14.5144	2104.95	19.579	2104.95	19.579	99.4338
67	48.4665	47694.6	1.28991	7.65702	2.61004	6.96355	2.91879	0.386713	1.30654	0.447631	2107.57	23.488	2106.79	25.921	2106.02	45.8136	2106.02	45.8136	100.073
55	122.523	111972	1.14052	7.6556	0.554511	6.69634	0.774564	0.371805	0.540802	0.698202	2037.89	9.44888	2072.14	6.84301	2106.35	9.7304	2106.35	9.7304	96.75
12	139.513	102020	2.3991	7.64803	0.788643	6.97649	1.27741	0.386977	1.0049	0.786668	2108.8	18.0741	2108.44	11.345	2108.08	13.8373	2108.08	13.8373	100.034
80	165.443	211757	1.31296	7.38109	0.73066	7.10483	1.41678	0.380341	1.21384	0.856758	2077.88	21.5609	2124.65	12.6114	2170.2	12.7337	2170.2	12.7337	95.7457
52	134.342	67233.6	1.19573	7.11757	0.687824	7.81527	1.11485	0.403436	0.87738	0.786992	2184.84	16.2588	2209.97	10.0362	2233.33	11.9025	2233.33	11.9025	97.8287
35	210.854	206941	2.626	6.98939	0.624578	8.17382	1.88173	0.414346	1.77505	0.943309	2234.76	33.5229	2250.45	17.0256	2264.73	10.7713	2264.73	10.7713	98.6769
58	170.244	119944	0.893826	6.74631	0.683721	8.70265	1.8722	0.425811	1.74289	0.930931	2286.8	33.5542	2307.36	17.0524	2325.58	11.718	2325.58	11.718	98.3325
11	50.5341	56891.8	1.97957	6.69875	1.04229	8.93371	1.55233	0.434035	1.15037	0.741059	2323.88	22.4451	2331.25	14.1763	2337.7	17.8385	2337.7	17.8385	99.4089
64	142.864	172718	1.48329	6.6677	0.504767	9.08743	1.27579	0.439456	1.17169	0.918402	2348.21	23.0596	2346.85	11.6705	2345.65	8.63022	2345.65	8.63022	100.109
5	40.8536	57723.1	1.36892	6.54661	1.27531	9.30855	2.01078	0.441974	1.55462	0.773141	2359.47	30.7174	2368.86	18.4386	2376.94	21.7383	2376.94	21.7383	99.2652
84	169.427	137246	2.72449	6.45884	0.592087	9.53899	0.978854	0.446844	0.77948	0.796319	2381.21	15.5188	2391.31	8.99628	2399.91	10.0695	2399.91	10.0695	99.2204
34	183.513	360618	2.85784	6.0836	0.487135	10.7433	0.911226	0.474022	0.770086	0.84511	2501.18	15.9644	2501.18	8.46474	2501.17	8.19708	2501.17	8.19708	100
93	136.856	103422	1.58729	6.06787	0.621737	10.783	0.814904	0.474543	0.526794	0.646448	2503.45	10.9289	2504.6	7.57231	2505.53	10.4585	2505.53	10.4585	99.9172
24	180.05	44971.5	1.11886	5.98912	0.337378	10.0542	1.42127	0.436725	1.38064	0.971417	2335.96	27.0543	2439.77	13.1265	2527.48	5.66442	2527.48	5.66442	92.4227
47	106.164	49338.2	1.1856	5.98714	0.68232	10.6977	1.69443	0.464524	1.55098	0.91534	2459.5	31.7132	2497.22	15.7355	2528.03	11.4553	2528.03	11.4553	97.2893
39	245.61	120443	4.14753	5.88535	0.339464	10.5374	3.37201	0.449787	3.35488	0.99492	2394.3	67.0985	2483.22	31.2811	2556.77	5.68011	2556.77	5.68011	93.6455
2	20.948	24769.9	1.00673	5.85308	1.47476	11.6174	2.20538	0.493165	1.63975	0.743521	2584.36	34.9127	2574.08	20.6211	2565.97	24.6655	2565.97	24.6655	100.716
81	105.426	89477.3	4.16099	5.79111	0.648227	11.699	1.02247	0.491373	0.79073	0.77335	2576.61	16.7947	2580.62	9.56476	2583.76	10.8236	2583.76	10.8236	99.7233
1	231.352	364469	2.68019	5.76645	0.321931	11.8736	1.10461	0.496578	1.05666	0.956589	2599.07	22.6019	2594.48	10.3452	2590.89	5.37153	2590.89	5.37153	100.316
50	135.401	167503	1.59269	5.73921	0.413311	11.7978	1.10052	0.491078	1.01996	0.926798	2575.34	21.6547	2588.49	10.3017	2598.78	6.88809	2598.78	6.88809	99.0982
22	98.9335	140460	1.3402	5.56835	1.07018	12.8638	1.52046	0.519509	1.08005	0.710346	2697.1	23.8043	2669.72	14.3259	2649.04	17.7548	2649.04	17.7548	101.814
33	73.9423	116525	3.04242	5.39303	0.641011	13.2888	2.18598	0.519777	2.08988	0.95604	2698.24	46.077	2700.39	20.6455	2701.98	10.5835	2701.98	10.5835	99.8613
48	66.8726	187718	1.74088	5.34497	0.548686	13.4909	1.50758	0.522979	1.40418	0.931418	2711.8	31.0839	2714.65	14.2523	2716.75	9.04648	2716.75	9.04648	99.8178
25	42.1515	113035	1.31543	5.04882	0.945602	14.8387	2.02994	0.543357	1.79624	0.884875	2797.49	40.7669	2804.95	19.3126	2810.31	15.4578	2810.31	15.4578	99.5435
13	133.006	285006	5.04599	4.91528	0.489303	15.7414	0.922843	0.561165	0.782446	0.847865	2871.44	18.1307	2861.23	8.8109	2854.04	7.96729	2854.04	7.96729	100.61
Rejected Analyses: >10% discordant; >5% rev discordant; >10% 2s err; grains <500 Ma-evaluated by 1s err concordance; 1200 Ma cutoff
36	13.3679	10565.3	0.587513	10.441	12.0914	4.2418	12.4825	0.321213	3.10025	0.248367	1795.65	48.5895	1682.15	102.916	1543.36	228.139	1543.36	228.139	116.347
96	41.8697	37807.6	0.87146	9.2856	1.94068	5.09149	2.99774	0.342889	2.28478	0.762167	1900.55	37.608	1834.69	25.4469	1760.74	35.4821	1760.74	35.4821	107.941
43	15.0676	11567	0.876656	9.08914	7.85874	5.00283	8.33388	0.32979	2.77377	0.33283	1837.36	44.3455	1819.8	70.6377	1799.74	143.208	1799.74	143.208	102.091
6	31.4105	27929.7	1.11975	9.03164	3.37056	5.30858	3.60218	0.347732	1.27082	0.352792	1923.76	21.137	1870.25	30.7875	1811.28	61.2552	1811.28	61.2552	106.21
77	85.6536	11386.8	0.514384	8.4983	6.65124	5.22521	6.74415	0.322058	1.11556	0.165412	1799.77	17.5186	1856.74	57.5402	1921.13	119.387	1921.13	119.387	93.6831
8	180.596	27125.7	1.33657	6.44649	0.327916	7.13693	5.56491	0.333682	5.55524	0.998262	1856.21	89.6044	2128.66	49.6002	2403.17	5.57488	2403.17	5.57488	77.2399
49	251.583	10987.5	0.557381	5.93584	0.610282	8.98728	2.83732	0.38691	2.77091	0.976594	2108.48	49.8322	2336.71	25.9306	2542.47	10.2311	2542.47	10.2311	82.9304
23	616.165	1292.03	2.12954	5.89813	0.480587	8.75711	3.45596	0.374605	3.42238	0.990284	2051.03	60.125	2313.04	31.5048	2553.14	8.04551	2553.14	8.04551	80.3337
99	135.25	33685.6	1.76701	5.45716	0.752496	10.6653	1.86615	0.42212	1.70771	0.915097	2270.1	32.6765	2494.4	17.3259	2682.46	12.4435	2682.46	12.4435	84.6276
J1470, Neruokpuk Formation						(n=253/295)
95	309.373	105761	6.65446	13.6593	1.35763	1.6795	2.38868	0.166382	1.96536	0.822781	992.147	18.0729	1000.79	15.2036	1019.76	27.5086	992.147	18.0729	97.292
207	169.922	53926.1	3.39724	13.6158	1.46851	1.77814	2.80406	0.175593	2.38877	0.851898	1042.86	23.0009	1037.5	18.2253	1026.21	29.71	1042.86	23.0009	101.622
216	102.112	44302.4	3.58692	13.5055	1.91674	1.84655	3.87886	0.180871	3.3722	0.869377	1071.73	33.2967	1062.2	25.5546	1042.65	38.68	1071.73	33.2967	102.789
149	186.932	97270.8	1.2672	13.4451	1.20016	1.69509	2.80026	0.165294	2.53003	0.9035	986.131	23.1349	1006.68	17.8852	1051.71	24.2022	986.131	23.1349	93.7641
58	221.756	183084	2.98913	13.2812	2.06951	1.81931	3.67415	0.175244	3.03588	0.826279	1040.94	29.1823	1052.44	24.0787	1076.39	41.5698	1040.94	29.1823	96.7059
138	175.523	129294	2.02302	13.1267	1.59238	2.00483	2.59114	0.190868	2.0441	0.788879	1126.07	21.1199	1117.15	17.5559	1099.82	31.8431	1126.07	21.1199	102.387
201	29.8844	30747.3	2.76095	12.9914	2.28203	1.84702	3.81675	0.174031	3.0594	0.801572	1034.28	29.2351	1062.37	25.1474	1120.53	45.5008	1034.28	29.2351	92.3029
47	68.7294	76379.6	8.5585	12.9538	2.23773	2.11682	3.18623	0.198874	2.26818	0.71187	1169.27	24.2551	1154.3	21.9759	1126.28	44.6025	1169.27	24.2551	103.817
25	368.441	118766	4.51018	12.8992	1.35828	1.96988	3.66192	0.18429	3.4007	0.928665	1090.37	34.114	1105.27	24.6675	1134.69	27.0311	1090.37	34.114	96.0941
126	146.189	3.60489e+06	1.9062	12.7358	1.30365	2.24057	2.27808	0.206959	1.86819	0.820074	1212.6	20.6506	1193.84	15.9945	1160.01	25.8699	1212.6	20.6506	104.533
91	189.383	46006.9	2.37331	12.6096	2.04299	2.29088	2.91854	0.209508	2.08425	0.71414	1226.2	23.2735	1209.48	20.6322	1179.77	40.3916	1226.2	23.2735	103.936
232	55.0317	65808	1.74217	12.5641	2.02764	2.17555	3.83885	0.198244	3.25967	0.849126	1165.88	34.7656	1173.25	26.7104	1186.91	40.0495	1165.88	34.7656	98.2282
219	115.508	97508.9	2.71322	12.5632	1.95115	2.20557	3.31273	0.200965	2.67716	0.808144	1180.5	28.8793	1182.81	23.1476	1187.05	38.5219	1180.5	28.8793	99.4489
200	274.362	81351.3	2.46608	12.3466	1.72832	2.25577	7.0021	0.201996	6.78545	0.969059	1186.03	73.5114	1198.59	49.2992	1221.27	33.9683	1221.27	33.9683	97.1144
84	91.3561	45178.1	4.49698	12.1931	1.82569	2.35113	3.3402	0.207916	2.79711	0.837406	1217.71	31.0372	1227.9	23.7995	1245.86	35.7404	1245.86	35.7404	97.7402
10	187.564	48492.9	3.28842	12.1449	2.18473	2.37875	4.44036	0.209527	3.86571	0.870586	1226.3	43.1697	1236.24	31.7528	1253.58	42.7414	1253.58	42.7414	97.8239
266	135.094	51587.7	2.76655	11.8512	1.77956	2.392	4.08309	0.2056	3.67489	0.900026	1205.33	40.4006	1240.21	29.2445	1301.3	34.5621	1301.3	34.5621	92.625
31	113.585	74486.3	3.00693	11.7174	1.93969	2.82322	3.4704	0.239925	2.87772	0.829219	1386.31	35.8965	1361.72	26.0268	1323.33	37.5746	1323.33	37.5746	104.759
290	147.222	93597.8	2.99514	11.5787	2.0452	2.8658	5.73071	0.24066	5.35334	0.934149	1390.13	66.9437	1372.97	43.1625	1346.36	39.4923	1346.36	39.4923	103.251
289	101.238	78719.5	2.56902	11.1489	2.12955	3.19413	5.55865	0.258276	5.13456	0.923705	1481.02	67.9431	1455.74	43.0101	1419.02	40.7105	1419.02	40.7105	104.369
260	162.434	50964.7	3.41671	11.1176	1.91724	3.09819	4.27768	0.249814	3.82396	0.893935	1437.52	49.2733	1432.24	32.8477	1424.4	36.6245	1424.4	36.6245	100.921
168	79.1131	40266.1	1.82684	11.1113	1.70763	2.96082	2.91329	0.238604	2.36035	0.8102	1379.43	29.3118	1397.63	22.1161	1425.47	32.615	1425.47	32.615	96.7703
249	51.1648	110730	2.43452	11.1026	2.04801	3.17783	2.8688	0.255892	2.00889	0.700255	1468.79	26.3864	1451.79	22.1605	1426.97	39.1094	1426.97	39.1094	102.931
211	121.216	45337.7	2.14494	11.0716	1.17157	3.08313	2.76204	0.247572	2.50125	0.905584	1425.94	31.9975	1428.51	21.1797	1432.31	22.3548	1432.31	22.3548	99.5555
243	248.077	199581	2.29205	11.0326	1.17238	3.01772	3.45737	0.241467	3.25252	0.940752	1394.32	40.7818	1412.11	26.3738	1439.03	22.35	1439.03	22.35	96.8926
86	215.993	257510	1.33647	10.9609	1.59886	3.09951	4.76181	0.246398	4.48536	0.941945	1419.87	57.162	1432.57	36.5721	1451.46	30.4301	1451.46	30.4301	97.8235
39	44.1829	231274	2.45261	10.9502	2.39959	3.1938	3.61388	0.253646	2.70224	0.747739	1457.25	35.2452	1455.66	27.952	1453.32	45.6621	1453.32	45.6621	100.271
247	30.2451	66963.4	1.73746	10.7929	1.94973	3.17386	3.53449	0.248441	2.94808	0.834089	1430.43	37.8196	1450.82	27.2968	1480.81	36.9632	1480.81	36.9632	96.5981
2	348.84	153572	2.67057	10.7057	1.40264	3.25441	5.83772	0.252689	5.6667	0.970706	1452.33	73.6905	1470.23	45.3727	1496.16	26.534	1496.16	26.534	97.0707
184	159.438	103471	0.902896	10.5049	1.78462	3.42403	2.29791	0.260873	1.44759	0.629959	1494.31	19.3074	1509.93	18.0604	1531.89	33.6018	1531.89	33.6018	97.5468
32	89.5707	40719.2	1.82525	10.4068	2.95566	3.34547	4.79302	0.252508	3.77322	0.787231	1451.39	49.0379	1491.73	37.485	1549.53	55.5284	1549.53	55.5284	93.6667
217	214.217	233461	4.60844	10.0814	1.12587	3.8214	2.78004	0.27941	2.54185	0.914324	1588.39	35.7854	1597.26	22.3769	1608.97	20.9839	1608.97	20.9839	98.7206
82	212.154	88122.7	2.37591	9.92582	1.58082	3.9454	6.07317	0.284025	5.86382	0.965529	1611.6	83.6193	1623.05	49.2352	1637.9	29.3534	1637.9	29.3534	98.3942
66	74.8934	28585.6	3.51315	9.87396	2.03369	3.77427	4.36441	0.270286	3.86163	0.8848	1542.25	52.9689	1587.29	35.0473	1647.62	37.718	1647.62	37.718	93.6047
191	193.513	188891	0.9117	9.87051	0.834153	3.99484	1.99385	0.285981	1.81097	0.90828	1621.41	25.9618	1633.15	16.1933	1648.27	15.4677	1648.27	15.4677	98.3705
98	145.259	74295.8	1.64459	9.67354	2.03485	4.1641	3.17892	0.292149	2.44231	0.768285	1652.26	35.5972	1666.98	26.0334	1685.56	37.5574	1685.56	37.5574	98.0243
171	102.018	106339	1.33173	9.56354	1.86581	4.27995	3.26441	0.296863	2.67864	0.820559	1675.73	39.5275	1689.51	26.8748	1706.64	34.3466	1706.64	34.3466	98.1892
113	197.827	108920	1.01521	9.46634	1.60971	4.36791	4.57296	0.299885	4.28028	0.935998	1690.74	63.6582	1706.29	37.8004	1725.42	29.5595	1725.42	29.5595	97.99
129	221.415	126350	1.68181	9.25859	1.31589	4.95647	2.52186	0.332825	2.15133	0.853073	1852.06	34.6316	1811.93	21.3107	1766.06	24.0424	1766.06	24.0424	104.869
262	48.3293	80981.8	1.02495	9.25354	1.51437	4.9508	2.50564	0.332263	1.99622	0.796692	1849.34	32.0939	1810.96	21.1695	1767.06	27.6643	1767.06	27.6643	104.656
111	91.1585	196553	0.873969	9.20691	1.63269	4.93458	2.64516	0.329506	2.08115	0.786777	1835.99	33.2505	1808.19	22.3363	1776.29	29.7941	1776.29	29.7941	103.361
203	136.205	161503	2.00507	9.20381	1.85048	4.84698	2.86459	0.323547	2.18668	0.763349	1807.03	34.4592	1793.09	24.1164	1776.9	33.7668	1776.9	33.7668	101.696
295	104.106	173247	1.06225	9.18578	1.62166	4.88083	2.71968	0.325169	2.18332	0.802786	1814.92	34.5365	1798.95	22.9233	1780.47	29.5773	1780.47	29.5773	101.935
198	20.129	27290.7	38.2581	9.16824	2.4954	4.75248	3.83466	0.316013	2.91163	0.759293	1770.23	45.0719	1776.55	32.1786	1783.96	45.4955	1783.96	45.4955	99.2304
18	77.528	243815	0.764459	9.15968	1.65319	4.66517	2.62917	0.309918	2.04439	0.777578	1740.3	31.1808	1761.02	21.9873	1785.66	30.1332	1785.66	30.1332	97.4599
102	92.3095	49027.2	1.02753	9.15402	1.91072	5.05426	4.67827	0.335558	4.27029	0.912793	1865.27	69.1668	1828.46	39.6765	1786.79	34.8217	1786.79	34.8217	104.392
128	56.8913	88401.1	1.17544	9.15109	2.1706	4.81293	3.68478	0.319434	2.9776	0.80808	1786.96	46.4713	1787.16	30.9878	1787.37	39.5568	1787.37	39.5568	99.9771
218	111.532	80512.5	3.11106	9.14596	1.08358	4.87472	2.2381	0.323354	1.9583	0.874983	1806.09	30.8462	1797.9	18.8591	1788.39	19.7428	1788.39	19.7428	100.989
101	159.812	110993	2.47157	9.1441	1.80058	4.67573	2.73676	0.310091	2.06101	0.753085	1741.15	31.4478	1762.91	22.8964	1788.76	32.8059	1788.76	32.8059	97.3384
153	291.925	466252	3.99696	9.14242	1.29645	4.77652	2.75513	0.316717	2.43104	0.882369	1773.68	37.6959	1780.78	23.1362	1789.1	23.6197	1789.1	23.6197	99.1381
231	113.889	50850.7	2.46022	9.14209	1.39812	4.75357	2.84277	0.315184	2.4752	0.870699	1766.17	38.2394	1776.74	23.8525	1789.16	25.4722	1789.16	25.4722	98.7147
63	48.8747	87712.2	0.965781	9.13781	1.77876	4.87809	3.38638	0.323289	2.88159	0.850935	1805.77	45.383	1798.48	28.5426	1790.02	32.4034	1790.02	32.4034	100.88
195	102.449	68006.1	3.17349	9.11853	1.80352	4.79813	2.67222	0.317318	1.97182	0.737896	1776.62	30.6191	1784.57	22.4572	1793.87	32.8389	1793.87	32.8389	99.0386
291	166.027	87186.1	2.41541	9.07807	1.87108	4.63001	3.22618	0.304842	2.62818	0.814639	1715.27	39.5817	1754.7	26.946	1801.96	34.0357	1801.96	34.0357	95.1895
182	79.6614	177814	3.15705	9.07474	1.37237	4.91596	2.53234	0.32355	2.12822	0.840419	1807.04	33.5382	1805	21.3697	1802.62	24.9598	1802.62	24.9598	100.245
123	102.335	138109	1.55947	9.0584	1.44112	4.93707	2.37068	0.324354	1.88236	0.794019	1810.96	29.7194	1808.62	20.0196	1805.9	26.2018	1805.9	26.2018	100.28
70	66.622	44763.7	0.467377	9.04108	2.17886	4.70165	4.21837	0.308297	3.61209	0.856277	1732.32	54.872	1767.53	35.3345	1809.38	39.6	1809.38	39.6	95.7411
250	109.322	143063	1.72561	9.03685	1.70789	5.03357	2.68823	0.329907	2.07598	0.772249	1837.93	33.1983	1824.99	22.7756	1810.23	31.0348	1810.23	31.0348	101.53
241	84.0858	139198	1.47289	9.03375	1.27316	4.92861	2.66499	0.322917	2.3412	0.878503	1803.96	36.8401	1807.17	22.4993	1810.86	23.1336	1810.86	23.1336	99.6192
278	63.7391	750594	1.62586	9.02937	1.42984	5.00126	3.75977	0.327518	3.47727	0.924863	1826.34	55.3048	1819.54	31.8251	1811.74	25.9781	1811.74	25.9781	100.806
125	75.9782	72184.3	1.92925	9.02908	1.78946	4.88519	3.25168	0.319907	2.71501	0.834956	1789.27	42.4206	1799.7	27.4135	1811.79	32.5112	1811.79	32.5112	98.757
40	123.741	177936	1.38121	9.0205	1.39837	4.93706	2.19216	0.322997	1.68823	0.770123	1804.35	26.57	1808.62	18.5117	1813.52	25.4006	1813.52	25.4006	99.4941
131	93.888	93873.9	1.6951	9.01682	1.77305	4.85385	2.31116	0.317423	1.48248	0.641444	1777.13	23.0262	1794.28	19.4607	1814.26	32.2052	1814.26	32.2052	97.9535
186	47.829	27783.2	1.0174	9.01554	1.75004	4.72445	3.96915	0.308917	3.56252	0.897551	1735.37	54.2019	1771.59	33.2737	1814.52	31.7862	1814.52	31.7862	95.6381
133	64.5995	51557.4	1.81125	9.00414	2.46415	4.93254	5.05036	0.322115	4.40841	0.872891	1800.05	69.2403	1807.84	42.6616	1816.82	44.7445	1816.82	44.7445	99.077
34	125.829	111023	0.792676	8.99228	0.976105	4.9946	2.97534	0.325739	2.81067	0.944655	1817.7	44.5192	1818.41	25.1766	1819.21	17.7171	1819.21	17.7171	99.9169
27	59.2003	57036.8	0.601917	8.98077	2.236	5.01699	3.42835	0.32678	2.59883	0.758039	1822.76	41.2627	1822.19	29.0334	1821.53	40.5785	1821.53	40.5785	100.067
24	144.718	58965.5	1.20335	8.97977	1.6454	4.77367	6.01657	0.310896	5.78721	0.961878	1745.12	88.4835	1780.28	50.552	1821.74	29.8587	1821.74	29.8587	95.7942
269	177.581	193276	2.17163	8.97168	1.56526	5.10713	3.47841	0.332314	3.10633	0.893031	1849.59	49.9479	1837.29	29.5443	1823.37	28.3986	1823.37	28.3986	101.438
230	128.97	113763	1.17544	8.96224	1.61422	4.91767	2.88202	0.31965	2.38754	0.828425	1788.02	37.2811	1805.29	24.3231	1825.28	29.2783	1825.28	29.2783	97.9586
73	287.11	143267	1.32695	8.95651	1.44636	5.02405	3.0075	0.326356	2.63688	0.876767	1820.7	41.8259	1823.38	25.4737	1826.44	26.231	1826.44	26.231	99.6855
107	101.593	182164	0.986288	8.95268	1.60054	5.14522	3.1158	0.334085	2.67329	0.857979	1858.15	43.1563	1843.61	26.495	1827.21	29.0232	1827.21	29.0232	101.693
97	84.0662	50938.9	1.62325	8.94363	1.88881	4.89085	2.87583	0.317247	2.16859	0.754075	1776.27	33.6689	1800.68	24.2483	1829.05	34.2444	1829.05	34.2444	97.1142
85	76.832	137405	3.68329	8.93666	1.5908	4.98942	2.662	0.323388	2.13438	0.801797	1806.25	33.6226	1817.53	22.5203	1830.46	28.8352	1830.46	28.8352	98.6775
202	51.6559	111941	1.86157	8.93657	1.53907	5.13041	3.20343	0.332523	2.80948	0.877024	1850.6	45.1958	1841.15	27.2277	1830.48	27.8973	1830.48	27.8973	101.099
280	75.8415	56882.5	2.01298	8.92962	1.61994	5.08636	3.54028	0.329411	3.14792	0.889172	1835.53	50.284	1833.83	30.0499	1831.89	29.3584	1831.89	29.3584	100.199
286	36.5038	84807.8	0.9982	8.91989	1.63667	4.94844	4.39665	0.320131	4.08067	0.928131	1790.37	63.7932	1810.56	37.1545	1833.87	29.6545	1833.87	29.6545	97.628
252	106.785	53798.5	1.4963	8.90887	1.58736	5.15821	2.76716	0.333288	2.2666	0.819107	1854.3	36.5254	1845.75	23.5389	1836.11	28.753	1836.11	28.753	100.991
33	152.069	62555.4	1.47988	8.89849	1.90587	4.94561	3.82434	0.319179	3.31561	0.866975	1785.72	51.7156	1810.08	32.3114	1838.22	34.5153	1838.22	34.5153	97.1441
272	151.926	231938	1.67308	8.89625	2.00847	5.07069	5.0194	0.327169	4.60005	0.916454	1824.65	73.1047	1831.21	42.5956	1838.67	36.372	1838.67	36.372	99.2371
144	288.336	68342.3	2.02243	8.88998	1.11063	4.98638	3.30086	0.321503	3.10841	0.941695	1797.06	48.7507	1817.01	27.9246	1839.95	20.1083	1839.95	20.1083	97.6691
136	165.224	186745	2.08821	8.88478	1.94672	5.09158	4.9349	0.328094	4.5347	0.918905	1829.14	72.2195	1834.7	41.9061	1841.01	35.2434	1841.01	35.2434	99.355
257	111.371	208171	2.35977	8.88091	1.72025	4.99165	3.0644	0.321514	2.53599	0.827567	1797.12	39.7741	1817.91	25.9279	1841.8	31.1394	1841.8	31.1394	97.5741
284	58.445	53859.4	1.41171	8.87758	1.77474	5.05673	4.76245	0.325584	4.41941	0.927971	1816.94	69.9771	1828.88	40.3944	1842.48	32.1234	1842.48	32.1234	98.614
140	270.251	55089.2	3.70453	8.87229	1.42426	5.1647	2.51025	0.332338	2.06708	0.823457	1849.7	33.2387	1846.82	21.3572	1843.56	25.7766	1843.56	25.7766	100.333
227	110.707	96169.5	1.97033	8.85795	1.56082	5.00951	2.63548	0.321831	2.12358	0.805766	1798.66	33.3305	1820.93	22.3108	1846.48	28.2385	1846.48	28.2385	97.4102
208	138.388	148581	4.13263	8.84996	1.50619	5.09739	3.5209	0.327181	3.18248	0.903881	1824.7	50.5767	1835.67	29.896	1848.12	27.2445	1848.12	27.2445	98.7332
159	74.358	78888.5	40.0685	8.83035	1.57132	5.08369	4.25139	0.325578	3.95035	0.92919	1816.91	62.5486	1833.39	36.0874	1852.13	28.4091	1852.13	28.4091	98.0988
109	155.657	81431.4	1.13029	8.82934	1.47796	5.17923	5.08929	0.331659	4.86995	0.956903	1846.42	78.1922	1849.21	43.3392	1852.34	26.7202	1852.34	26.7202	99.6807
240	26.9066	55264.9	1.04039	8.82327	2.13181	4.98763	4.9992	0.31917	4.52187	0.90452	1785.68	70.5303	1817.23	42.3078	1853.58	38.5348	1853.58	38.5348	96.3367
30	106.355	191749	2.28893	8.81108	1.63908	5.01735	3.31341	0.320629	2.8796	0.869075	1792.8	45.0691	1822.25	28.0598	1856.07	29.6202	1856.07	29.6202	96.5909
223	58.2092	31600.5	1.67695	8.79852	1.86327	5.14364	5.04384	0.328231	4.68706	0.929264	1829.8	74.6696	1843.34	42.9037	1858.65	33.6602	1858.65	33.6602	98.4478
35	335.135	86410.9	1.83232	8.78434	1.51656	5.43813	3.74572	0.346463	3.42498	0.914371	1917.69	56.8134	1890.88	32.1366	1861.56	27.3876	1861.56	27.3876	103.015
49	291.829	109889	1.34883	8.75782	1.47218	5.39604	2.3758	0.342744	1.86471	0.784875	1899.86	30.6838	1884.22	20.3546	1867.02	26.5665	1867.02	26.5665	101.759
199	73.2868	41539.8	0.573627	8.75067	2.53472	5.01396	5.70632	0.318215	5.11246	0.89593	1781.01	79.5618	1821.68	48.3431	1868.5	45.7406	1868.5	45.7406	95.3175
80	87.8866	123787	1.50479	8.74838	2.19368	5.39837	2.8269	0.342522	1.78302	0.630731	1898.79	29.3254	1884.59	24.2224	1868.97	39.5818	1868.97	39.5818	101.596
12	378.302	406699	1.93917	8.74653	1.54955	5.12452	5.54188	0.325078	5.32084	0.960114	1814.48	84.153	1840.18	47.1172	1869.35	27.9553	1869.35	27.9553	97.0649
220	146.029	143220	1.10045	8.73842	1.60535	4.69164	5.47433	0.297342	5.23365	0.956036	1678.12	77.3296	1765.75	45.8504	1871.02	28.9564	1871.02	28.9564	89.6897
242	212.461	432176	0.761366	8.73711	1.67156	5.11571	5.61941	0.32417	5.36504	0.954734	1810.06	84.673	1838.72	47.7639	1871.3	30.1499	1871.3	30.1499	96.7277
254	158.137	137283	1.00182	8.73489	1.62712	5.04842	3.38291	0.319824	2.9659	0.87673	1788.87	46.3316	1827.48	28.678	1871.75	29.3465	1871.75	29.3465	95.572
283	40.1897	582751	0.84353	8.73262	2.10952	5.59208	3.02837	0.354174	2.17278	0.717474	1954.5	36.6337	1914.88	26.0907	1872.22	38.0479	1872.22	38.0479	104.395
143	55.1486	94151.7	0.88093	8.72943	1.82328	5.28362	3.01132	0.334516	2.39661	0.795866	1860.23	38.727	1866.22	25.7159	1872.88	32.881	1872.88	32.881	99.3246
255	236.331	153302	4.61966	8.70106	2.21239	5.21302	3.12556	0.328973	2.20782	0.706377	1833.4	35.2315	1854.75	26.6345	1878.75	39.8725	1878.75	39.8725	97.5863
259	109.264	76745.6	1.83993	8.69655	1.83345	5.10458	3.66237	0.321963	3.17039	0.865668	1799.31	49.7768	1836.87	31.1051	1879.68	33.0375	1879.68	33.0375	95.7241
147	49.3319	193861	2.95007	8.69011	1.88479	5.48834	2.87044	0.345912	2.16495	0.754222	1915.05	35.869	1898.77	24.6588	1881.02	33.9575	1881.02	33.9575	101.809
116	76.3325	197527	0.78101	8.6873	2.27356	5.18115	3.92085	0.326444	3.19437	0.814714	1821.12	50.6795	1849.52	33.3829	1881.6	40.9614	1881.6	40.9614	96.7859
115	160.519	101774	2.54107	8.67527	1.20748	5.4079	2.00654	0.34026	1.60255	0.798666	1887.92	26.2273	1886.11	17.1962	1884.1	21.7461	1884.1	21.7461	100.203
55	30.6015	126200	10.5539	8.65219	2.09869	5.64178	3.82138	0.354031	3.1935	0.835693	1953.82	53.828	1922.51	32.9712	1888.89	37.7748	1888.89	37.7748	103.437
132	70.0731	47087	1.11133	8.649	1.76431	4.85886	4.60226	0.304789	4.25065	0.923601	1715.01	64.0099	1795.15	38.7734	1889.56	31.7556	1889.56	31.7556	90.7628
83	336.142	201364	5.29682	8.64306	1.48104	5.50545	3.18181	0.345111	2.8161	0.885064	1911.21	46.5774	1901.45	27.3479	1890.79	26.6522	1890.79	26.6522	101.08
279	122.056	56060.9	1.19789	8.63267	2.28327	5.5532	3.18692	0.347686	2.22332	0.697638	1923.54	36.9762	1908.87	27.4282	1892.95	41.0786	1892.95	41.0786	101.616
142	269.036	439231	1.31842	8.63196	0.928069	5.14154	2.22019	0.321886	2.01691	0.908441	1798.93	31.6604	1843	18.875	1893.1	16.6952	1893.1	16.6952	95.0257
145	61.5725	84003.6	3.35764	8.61914	1.67621	5.31329	3.25803	0.332144	2.79376	0.857499	1848.76	44.9045	1871	27.8485	1895.77	30.1471	1895.77	30.1471	97.5202
1	122.785	147598	1.61131	8.61863	2.09262	5.40983	3.14212	0.338159	2.3439	0.745962	1877.81	38.1835	1886.41	26.9334	1895.88	37.6359	1895.88	37.6359	99.0466
154	98.8069	250572	1.44121	8.61082	2.02078	5.3463	2.5908	0.333885	1.62134	0.625804	1857.18	26.1621	1876.3	22.1649	1897.51	36.3364	1897.51	36.3364	97.8747
151	46.1869	61958.5	1.03349	8.60735	2.11125	5.37153	3.2615	0.335325	2.48596	0.762213	1864.14	40.2436	1880.33	27.9262	1898.24	37.9606	1898.24	37.9606	98.2038
44	67.3126	55607	0.872236	8.59961	1.79098	5.36377	2.23407	0.33454	1.33546	0.597771	1860.35	21.5808	1879.09	19.122	1899.85	32.1941	1899.85	32.1941	97.9206
6	79.1868	35992	1.55022	8.593	2.1684	5.1633	2.97181	0.321789	2.03217	0.683814	1798.46	31.8926	1846.59	25.2845	1901.24	38.9744	1901.24	38.9744	94.5942
46	114.207	105396	0.324112	8.59244	1.42128	5.63795	2.61701	0.351347	2.19742	0.839671	1941.03	36.8304	1921.92	22.5732	1901.35	25.5423	1901.35	25.5423	102.087
61	151.686	66133.6	1.09491	8.59036	1.73839	5.45715	2.5212	0.339998	1.82604	0.724275	1886.66	29.8679	1893.88	21.6385	1901.79	31.2414	1901.79	31.2414	99.2045
268	89.6668	94666.7	0.959056	8.58884	2.11449	5.60742	2.79979	0.349298	1.83515	0.655458	1931.25	30.6254	1917.24	24.1306	1902.11	38.0012	1902.11	38.0012	101.532
166	84.3336	210089	2.39527	8.58821	1.5877	5.32164	2.36595	0.331472	1.75411	0.7414	1845.51	28.151	1872.34	20.2259	1902.24	28.531	1902.24	28.531	97.0179
120	72.0846	44014.7	0.930366	8.58434	1.24002	5.37129	2.44431	0.334414	2.10642	0.861764	1859.74	34.03	1880.29	20.9267	1903.05	22.2816	1903.05	22.2816	97.7243
139	95.8923	48008.6	1.38718	8.57661	1.2963	5.48082	2.51952	0.340926	2.16046	0.857489	1891.12	35.4098	1897.6	21.6386	1904.67	23.2865	1904.67	23.2865	99.2889
245	119.138	243326	0.77007	8.56996	1.98367	5.62698	3.39681	0.349746	2.75742	0.811767	1933.39	46.0606	1920.24	29.2942	1906.06	35.6326	1906.06	35.6326	101.434
21	83.4	121512	0.530702	8.56625	1.83257	5.42058	3.01812	0.336772	2.39807	0.794558	1871.12	38.9461	1888.11	25.8781	1906.84	32.9145	1906.84	32.9145	98.1269
155	133.819	99230.9	2.85562	8.56472	1.30971	5.39315	2.63311	0.335007	2.28427	0.86752	1862.61	36.9523	1883.77	22.5578	1907.16	23.5205	1907.16	23.5205	97.6639
127	22.2111	132481	1.77596	8.55805	1.53849	5.30163	2.75355	0.329066	2.28366	0.82935	1833.85	36.4494	1869.13	23.5265	1908.56	27.6256	1908.56	27.6256	96.0857
292	129.991	92316.9	2.10659	8.55497	1.59437	5.50188	2.79909	0.341372	2.30063	0.82192	1893.27	37.7441	1900.89	24.0547	1909.21	28.6271	1909.21	28.6271	99.1653
235	41.7302	117304	0.998814	8.55359	1.8858	5.49511	5.43232	0.340897	5.09449	0.937811	1890.99	83.4971	1899.83	46.6994	1909.49	33.8602	1909.49	33.8602	99.0307
221	77.3753	159755	2.31055	8.55133	1.6049	5.50517	2.40508	0.341431	1.79129	0.744794	1893.55	29.3915	1901.4	20.6696	1909.97	28.8136	1909.97	28.8136	99.1403
263	214.892	58706.6	1.94091	8.5289	2.03989	5.54873	3.05067	0.34323	2.26835	0.743559	1902.19	37.3653	1908.18	26.2518	1914.68	36.6053	1914.68	36.6053	99.3476
29	77.7756	92265.9	0.90564	8.5273	1.63305	5.36077	2.76901	0.331541	2.2362	0.80758	1845.85	35.8935	1878.61	23.7001	1915.02	29.3015	1915.02	29.3015	96.3879
141	179.35	183375	1.46301	8.52709	1.58285	5.45916	2.71991	0.337618	2.2119	0.813225	1875.2	35.9899	1894.2	23.3459	1915.06	28.4004	1915.06	28.4004	97.9183
197	70.5602	149138	2.00276	8.52698	1.75451	5.64414	2.88975	0.349053	2.29616	0.794588	1930.08	38.299	1922.87	24.9308	1915.09	31.4812	1915.09	31.4812	100.783
76	133.473	105974	1.184	8.52459	2.12202	5.60724	3.65177	0.346674	2.97194	0.813836	1918.7	49.3203	1917.21	31.4776	1915.59	38.0754	1915.59	38.0754	100.162
13	194.155	154853	1.20074	8.52375	1.57047	5.45266	2.91235	0.337084	2.45263	0.84215	1872.62	39.8598	1893.17	24.9937	1915.77	28.1758	1915.77	28.1758	97.748
193	91.479	134553	2.17924	8.52046	1.27919	5.55286	4.60655	0.343146	4.42538	0.960671	1901.79	72.8858	1908.82	39.6563	1916.46	22.9489	1916.46	22.9489	99.2344
282	154.947	175012	0.88694	8.51825	1.54624	5.58127	2.70201	0.344812	2.21585	0.820075	1909.78	36.6255	1913.21	23.2711	1916.93	27.7373	1916.93	27.7373	99.627
45	106.107	82945.7	0.640636	8.51395	1.52257	5.52082	3.52812	0.340905	3.18267	0.902087	1891.02	52.1621	1903.84	30.3392	1917.83	27.3116	1917.83	27.3116	98.6022
19	150.97	77097.1	1.26881	8.50747	1.3752	5.39529	4.20031	0.3329	3.96881	0.944885	1852.42	63.9011	1884.11	35.9954	1919.2	24.6635	1919.2	24.6635	96.5208
146	19.8314	37147.4	4.11002	8.50377	2.00973	5.46348	2.8462	0.336961	2.01541	0.708105	1872.03	32.7451	1894.87	24.4333	1919.98	36.0411	1919.98	36.0411	97.5028
172	150.186	140813	1.43054	8.49719	1.98537	5.54889	3.45511	0.341964	2.82774	0.818421	1896.11	46.452	1908.21	29.7341	1921.37	35.5984	1921.37	35.5984	98.6856
228	274.279	61108.3	3.25449	8.49164	1.76068	5.63494	3.1621	0.34704	2.62657	0.830641	1920.45	43.6227	1921.46	27.2748	1922.54	31.5661	1922.54	31.5661	99.8915
51	85.8198	32783.1	0.570974	8.48778	1.66615	5.24597	3.3126	0.322937	2.86309	0.864302	1804.06	45.0546	1860.12	28.2577	1923.35	29.868	1923.35	29.868	93.7977
93	86.9224	95205.3	2.09572	8.48493	1.74548	5.57881	5.42586	0.343311	5.13743	0.946843	1902.58	84.6449	1912.83	46.7519	1923.95	31.2883	1923.95	31.2883	98.8891
270	84.8411	44488.4	1.32861	8.48153	1.61599	5.47587	3.9609	0.336842	3.61626	0.912989	1871.46	58.7403	1896.82	34.0206	1924.67	28.964	1924.67	28.964	97.2352
160	128.802	68491.9	1.69836	8.48105	1.63693	5.51803	3.29628	0.339416	2.8611	0.867979	1883.86	46.7386	1903.41	28.3422	1924.77	29.3392	1924.77	29.3392	97.8743
64	161.116	167566	1.80915	8.46033	2.29337	5.34663	3.23232	0.32807	2.27778	0.704691	1829.02	36.2728	1876.35	27.6559	1929.15	41.083	1929.15	41.083	94.8095
77	274.669	77722.5	2.06062	8.45239	1.52185	5.16229	3.01613	0.316461	2.60404	0.86337	1772.42	40.3537	1846.42	25.661	1930.83	27.2566	1930.83	27.2566	91.7957
69	158.673	62586.3	1.51013	8.44892	1.87018	5.57283	3.21023	0.341488	2.60922	0.812782	1893.82	42.8177	1911.91	27.6437	1931.57	33.4916	1931.57	33.4916	98.0459
79	123.733	155227	0.70128	8.44567	1.80714	5.68156	3.89319	0.348017	3.44836	0.885741	1925.12	57.3914	1928.57	33.6267	1932.26	32.3597	1932.26	32.3597	99.6306
233	95.6004	64649	2.03068	8.44221	1.33869	5.52728	2.47354	0.338428	2.07998	0.840892	1879.1	33.9041	1904.85	21.2712	1932.99	23.9693	1932.99	23.9693	97.2122
157	105.247	166166	1.62894	8.42494	1.22211	5.58344	2.3426	0.341167	1.99856	0.853135	1892.28	32.7735	1913.55	20.176	1936.66	21.8722	1936.66	21.8722	97.7087
164	73.683	147380	5.80451	8.40924	1.51284	5.57354	2.61609	0.339928	2.13431	0.815836	1886.32	34.9047	1912.02	22.5261	1940	27.0638	1940	27.0638	97.2332
8	135.973	148115	3.67188	8.39073	1.9325	5.62806	4.75077	0.342497	4.33996	0.913528	1898.67	71.3782	1920.41	40.9829	1943.94	34.5577	1943.94	34.5577	97.6715
267	133.75	218405	2.68025	8.38877	1.68358	5.42488	3.7961	0.330056	3.40235	0.896274	1838.65	54.4283	1888.79	32.5568	1944.35	30.1036	1944.35	30.1036	94.5637
173	225.446	55659.9	2.23344	8.38818	1.22909	5.62625	2.73897	0.342283	2.44772	0.893663	1897.64	40.2371	1920.13	23.6182	1944.48	21.9748	1944.48	21.9748	97.5913
210	81.0593	82256.9	0.857734	8.37311	1.6425	5.5131	2.68906	0.334797	2.12914	0.791779	1861.59	34.4265	1902.64	23.116	1947.7	29.3573	1947.7	29.3573	95.5792
119	328.751	173530	3.73294	8.34352	1.55235	5.62033	2.87678	0.340103	2.422	0.841913	1887.16	39.6251	1919.22	24.8031	1954.02	27.7251	1954.02	27.7251	96.5785
281	249.39	140341	1.32981	8.32398	1.74359	5.61064	3.02193	0.338721	2.46819	0.816759	1880.51	40.2582	1917.73	26.0482	1958.21	31.1282	1958.21	31.1282	96.0324
276	63.7952	34986	1.33027	8.19325	2.22284	5.93654	4.20606	0.352767	3.5707	0.848942	1947.8	60.0274	1966.6	36.5665	1986.42	39.5542	1986.42	39.5542	98.0559
248	123.229	159023	3.10053	8.13573	1.72913	5.9645	2.92532	0.351941	2.35958	0.806605	1943.86	39.5977	1970.68	25.4436	1998.95	30.7237	1998.95	30.7237	97.2442
48	111.013	47095.4	2.31927	8.12295	1.6883	6.01415	3.07057	0.354313	2.56476	0.835274	1955.16	43.2554	1977.89	26.7392	2001.73	29.9884	2001.73	29.9884	97.6733
239	91.2343	85617.9	1.89878	8.06037	1.95568	6.05347	2.8175	0.353882	2.0282	0.719858	1953.11	34.1751	1983.57	24.5572	2015.46	34.6817	2015.46	34.6817	96.9063
94	308.023	200988	0.476677	8.05544	1.43445	6.22346	2.82052	0.363597	2.42852	0.861017	1999.2	41.7446	2007.75	24.6792	2016.54	25.4328	2016.54	25.4328	99.1399
26	77.7309	44254.1	1.66389	8.016	1.83715	5.8504	4.23341	0.340128	3.814	0.90093	1887.28	62.4034	1953.91	36.7264	2025.24	32.5424	2025.24	32.5424	93.188
236	73.9785	118354	0.462102	7.902	1.33877	6.6568	5.50973	0.381506	5.34461	0.970031	2083.31	95.1513	2066.91	48.6756	2050.58	23.6432	2050.58	23.6432	101.597
135	112.588	521541	2.21979	7.89428	2.47474	6.39936	4.7531	0.366394	4.05803	0.853765	2012.41	70.1492	2032.18	41.7632	2052.3	43.7052	2052.3	43.7052	98.0561
190	114.449	54051.5	1.42612	7.88058	2.06086	6.76906	2.97481	0.386888	2.14531	0.721159	2108.38	38.5795	2081.69	26.3236	2055.37	36.3805	2055.37	36.3805	102.579
256	57.0662	75110.4	2.84601	7.86825	1.90999	6.79049	2.88928	0.387505	2.16792	0.750333	2111.25	39.0311	2084.48	25.5769	2058.13	33.7057	2058.13	33.7057	102.581
104	62.2978	195388	1.46087	7.83582	2.22059	6.28739	3.15897	0.357317	2.24679	0.71124	1969.44	38.1292	2016.7	27.681	2065.42	39.1565	2065.42	39.1565	95.3532
99	400.51	60004.4	2.67632	7.74542	1.46754	6.32077	3.37204	0.35507	3.03595	0.90033	1958.76	51.2831	2021.34	29.5705	2085.85	25.8143	2085.85	25.8143	93.907
194	147.45	98360.4	3.68632	7.53521	1.48561	6.84066	3.01743	0.373845	2.62638	0.870402	2047.47	46.072	2091	26.737	2134.12	25.9911	2134.12	25.9911	95.9397
264	28.8299	29858.9	2.10357	7.40124	1.48566	7.20563	3.49133	0.38679	3.15946	0.904945	2107.92	56.8077	2137.2	31.1399	2165.45	25.9016	2165.45	25.9016	97.3434
294	221.389	84386.3	3.63859	7.33229	2.27194	7.33307	4.45875	0.389964	3.83649	0.860442	2122.66	69.3889	2152.85	39.8608	2181.76	39.5447	2181.76	39.5447	97.2914
74	71.8519	90347.4	4.30993	7.30077	2.39063	7.05716	3.56038	0.373678	2.63841	0.741047	2046.68	46.268	2118.66	31.6749	2189.25	41.5748	2189.25	41.5748	93.488
177	259.695	215402	1.59188	7.14383	0.832173	7.45112	2.41084	0.386057	2.26266	0.938537	2104.52	40.6269	2167.13	21.586	2226.96	14.4109	2226.96	14.4109	94.5018
209	25.3352	46378.3	1.97975	7.128	1.9245	7.36894	2.83364	0.380953	2.07986	0.733989	2080.73	36.987	2157.21	25.3395	2230.8	33.3162	2230.8	33.3162	93.2731
14	138.309	117543	0.726862	7.11191	0.929256	8.52786	2.42593	0.43987	2.24089	0.923727	2350.06	44.1314	2288.9	22.0506	2234.71	16.079	2234.71	16.079	105.162
226	48.8064	74224.1	1.48028	6.89859	1.9912	8.11412	2.96927	0.405976	2.20266	0.741818	2196.5	41.0009	2243.82	26.8477	2287.26	34.2632	2287.26	34.2632	96.0321
68	162.573	100570	8.52762	6.89706	1.77179	8.58556	3.53453	0.429469	3.05837	0.865284	2303.32	59.2348	2295.03	32.1557	2287.64	30.4854	2287.64	30.4854	100.686
185	96.1608	50461.2	2.58556	6.83444	1.17994	8.22482	4.20083	0.407688	4.03172	0.959742	2204.34	75.2748	2256.08	38.0485	2303.31	20.268	2303.31	20.268	95.703
178	218.389	77532.7	1.83744	6.81928	1.59105	8.44198	2.53901	0.417524	1.97868	0.77931	2249.23	37.5707	2279.7	23.0542	2307.13	27.3204	2307.13	27.3204	97.4904
100	135.083	144980	1.97669	6.81001	1.75655	8.99089	4.28558	0.444068	3.90906	0.912142	2368.82	77.4949	2337.08	39.179	2309.46	30.1556	2309.46	30.1556	102.57
137	60.3073	93012.6	1.14903	6.80176	1.51941	8.49972	5.83654	0.4193	5.6353	0.96552	2257.3	107.331	2285.89	53.0731	2311.54	26.0778	2311.54	26.0778	97.6533
42	88.2075	144887	1.46497	6.79624	1.58428	8.48431	6.04923	0.4182	5.83808	0.965096	2252.3	110.988	2284.25	55.0003	2312.94	27.1874	2312.94	27.1874	97.3784
108	384.403	52624.3	1.01211	6.79423	1.48139	7.91148	3.20362	0.38985	2.84054	0.886665	2122.13	51.3638	2220.99	28.8866	2313.44	25.4201	2313.44	25.4201	91.7303
121	65.8378	66296.8	0.880303	6.77497	1.43173	8.82387	6.15197	0.433576	5.98305	0.972542	2321.82	116.663	2319.96	56.1647	2318.32	24.5551	2318.32	24.5551	100.151
65	91.9897	89612.9	1.87907	6.76574	1.50997	8.5024	3.23033	0.417211	2.8557	0.884028	2247.8	54.1954	2286.18	29.3566	2320.65	25.8883	2320.65	25.8883	96.8608
22	39.3545	83229.7	3.21924	6.75815	1.2165	8.85125	2.25554	0.433841	1.89936	0.842088	2323.01	37.0477	2322.79	20.5804	2322.58	20.8512	2322.58	20.8512	100.019
117	214.056	147842	3.13779	6.74539	1.449	8.54045	2.67766	0.417818	2.25173	0.84093	2250.57	42.7766	2290.24	24.3434	2325.82	24.8293	2325.82	24.8293	96.7645
71	130.993	117402	2.34784	6.72592	1.61301	8.77563	2.99269	0.428083	2.52078	0.842315	2297.07	48.7121	2314.96	27.2853	2330.77	27.6289	2330.77	27.6289	98.5542
72	89.0171	43809.8	2.08334	6.69307	1.03257	9.13605	4.89429	0.443489	4.78413	0.977491	2366.24	94.7592	2351.73	44.822	2339.15	17.6694	2339.15	17.6694	101.158
54	218.548	193159	1.1027	6.66697	1.51734	9.14743	2.82454	0.442309	2.38238	0.843456	2360.97	47.0982	2352.87	25.8592	2345.83	25.9487	2345.83	25.9487	100.645
52	56.9011	45993.8	0.838446	6.66568	1.89875	8.82202	3.14377	0.426492	2.5056	0.797006	2289.88	48.2925	2319.77	28.6789	2346.16	32.4719	2346.16	32.4719	97.6012
271	146.139	129464	1.09905	6.64354	1.63386	8.12693	2.1466	0.391584	1.39226	0.64859	2130.17	25.2555	2245.24	19.4104	2351.85	27.9241	2351.85	27.9241	90.5742
53	92.3529	72986.5	2.07602	6.63777	1.78702	8.91782	2.5242	0.429319	1.78275	0.70626	2302.65	34.5194	2329.63	23.05	2353.33	30.5351	2353.33	30.5351	97.8461
3	188.197	50409.2	1.58126	6.62856	1.74396	8.56268	4.58101	0.41165	4.23606	0.924701	2222.46	79.635	2292.6	41.674	2355.71	29.7918	2355.71	29.7918	94.3437
253	55.948	82339.1	0.610632	6.62378	1.47872	8.72123	5.27101	0.41897	5.05934	0.959843	2255.8	96.3062	2309.3	48.0512	2356.94	25.2587	2356.94	25.2587	95.7089
273	32.0731	58837	1.18287	6.57383	3.35327	9.20138	4.525	0.438703	3.03829	0.671445	2344.83	59.7254	2358.25	41.4652	2369.86	57.2141	2369.86	57.2141	98.9438
90	281.655	132430	12.3109	6.56937	1.68509	9.11584	2.7189	0.434329	2.13376	0.784786	2325.2	41.6523	2349.7	24.8831	2371.02	28.7401	2371.02	28.7401	98.0676
5	62.7432	28697	1.18258	6.55712	2.12817	8.42228	7.60488	0.400536	7.30103	0.960046	2171.51	134.621	2277.58	69.13	2374.2	36.2882	2374.2	36.2882	91.4627
163	154.501	3.24949e+06	0.989936	6.5162	1.03412	9.14769	5.16337	0.432319	5.05875	0.979739	2316.16	98.4374	2352.89	47.2957	2384.87	17.612	2384.87	17.612	97.1192
112	61.1564	164635	1.99114	6.47063	1.44905	9.35957	4.52832	0.43924	4.29021	0.947419	2347.24	84.4093	2373.87	41.5646	2396.81	24.6498	2396.81	24.6498	97.9316
59	63.1217	210377	2.09988	6.42497	1.89495	9.37953	5.01611	0.43707	4.64441	0.925899	2337.51	91.0648	2375.83	46.0572	2408.85	32.1947	2408.85	32.1947	97.0383
122	245.217	143788	1.42676	6.38877	1.67967	9.74997	5.24119	0.451772	4.96476	0.947257	2403.12	99.6028	2411.44	48.3041	2418.45	28.5107	2418.45	28.5107	99.3664
92	427.443	71622.3	6.76497	6.13441	1.42082	11.1189	2.3717	0.494689	1.899	0.800694	2590.93	40.5164	2533.14	22.0982	2487.16	23.9461	2487.16	23.9461	104.172
288	28.8187	75435.6	1.71803	6.12447	2.23062	10.1588	3.12872	0.451243	2.19391	0.701215	2400.78	43.9758	2449.34	28.9294	2489.89	37.5903	2489.89	37.5903	96.421
28	140.324	110198	1.40524	6.11978	1.7743	10.5214	2.39842	0.466992	1.61379	0.672853	2470.35	33.1169	2481.81	22.243	2491.18	29.8939	2491.18	29.8939	99.1638
277	76.7661	134708	2.20957	6.11325	1.51482	10.6716	2.82163	0.473151	2.38053	0.843671	2497.36	49.2893	2494.96	26.2015	2492.98	25.519	2492.98	25.519	100.176
15	154.976	55194.6	3.43211	6.03083	1.4499	10.9103	2.82815	0.477212	2.42821	0.858587	2515.11	50.5687	2515.51	26.3113	2515.82	24.3696	2515.82	24.3696	99.9719
36	89.7508	1.96776e+06	1.11967	6.03003	1.24434	10.5863	2.88384	0.462981	2.60156	0.902119	2452.71	53.0747	2487.51	26.7609	2516.04	20.9134	2516.04	20.9134	97.4828
105	272.897	54567.7	2.75644	5.95658	0.978072	10.0191	2.93635	0.432839	2.76867	0.942895	2318.5	53.9173	2436.55	27.1159	2536.62	16.4038	2536.62	16.4038	91.4011
148	262.131	68005	14.1387	5.95569	1.38996	10.5498	3.21466	0.455696	2.89862	0.90169	2420.53	58.4961	2484.31	29.8235	2536.87	23.3134	2536.87	23.3134	95.4139
130	55.5582	73636.2	2.09085	5.95533	1.52239	10.6929	2.90613	0.461851	2.47546	0.851808	2447.73	50.4176	2496.81	26.9911	2536.97	25.5348	2536.97	25.5348	96.4822
16	221.618	202328	3.02414	5.94286	1.5217	10.492	2.3731	0.452224	1.821	0.767351	2405.13	36.5555	2479.21	22.0027	2540.49	25.5144	2540.49	25.5144	94.6721
196	83.7275	166463	2.12957	5.86754	1.71978	12.0324	3.32219	0.512043	2.84242	0.855584	2665.34	62.0528	2606.93	31.1544	2561.85	28.776	2561.85	28.776	104.04
174	259.793	235932	8.34735	5.85143	1.2744	10.4517	2.12508	0.443555	1.70055	0.800229	2366.54	33.6842	2475.64	19.6959	2566.45	21.3127	2566.45	21.3127	92.2107
150	129.511	129986	1.09737	5.84785	1.28804	10.3966	2.6341	0.440947	2.2977	0.872291	2354.88	45.327	2470.75	24.404	2567.47	21.5388	2567.47	21.5388	91.7198
261	125.207	161646	2.3868	5.82473	1.82255	11.6376	3.35841	0.491631	2.82086	0.839938	2577.73	59.9364	2575.7	31.4124	2574.09	30.4568	2574.09	30.4568	100.141
134	227.26	471369	2.02482	5.81763	1.61061	11.4003	3.12005	0.481016	2.6722	0.856461	2531.69	55.9498	2556.45	29.1336	2576.13	26.9084	2576.13	26.9084	98.275
192	84.5486	2.60997e+06	1.35531	5.79856	1.82768	11.4123	3.21098	0.479947	2.64007	0.822201	2527.03	55.1939	2557.44	29.9857	2581.62	30.5203	2581.62	30.5203	97.8857
170	246.157	52087.2	16.5298	5.79334	1.11516	11.3638	3.21861	0.477478	3.01925	0.93806	2516.27	62.9017	2553.46	30.0467	2583.12	18.6187	2583.12	18.6187	97.4121
251	51.1008	44447.7	1.70642	5.7721	1.69132	11.63	3.19484	0.486871	2.71043	0.848377	2557.12	57.2147	2575.09	29.88	2589.25	28.2245	2589.25	28.2245	98.7592
287	68.6885	178378	0.94706	5.7719	1.54709	11.5794	2.56425	0.484733	2.04496	0.79749	2547.85	43.0392	2571.01	23.9716	2589.31	25.8169	2589.31	25.8169	98.3988
81	90.6112	104597	2.08504	5.77145	1.5113	11.6646	2.22005	0.488262	1.62621	0.732513	2563.15	34.3932	2577.86	20.7649	2589.44	25.2192	2589.44	25.2192	98.9849
188	249.662	79908.1	1.353	5.75784	1.32685	11.7746	2.48653	0.491707	2.10293	0.845727	2578.06	44.6861	2586.65	23.2755	2593.38	22.1321	2593.38	22.1321	99.4093
179	105.34	88882.2	1.42302	5.7522	1.52171	11.725	2.15204	0.489153	1.52173	0.707112	2567.01	32.223	2582.69	20.1369	2595.01	25.3792	2595.01	25.3792	98.9208
43	201.544	236159	1.89596	5.74241	1.1991	11.5431	3.1329	0.480744	2.89434	0.923854	2530.51	60.578	2568.07	29.2829	2597.85	19.9921	2597.85	19.9921	97.4078
265	95.3615	348241	1.58911	5.73471	1.85821	11.8791	2.939	0.494078	2.27702	0.774758	2588.3	48.5417	2594.92	27.5318	2600.08	30.9777	2600.08	30.9777	99.5466
110	197.108	143749	2.03791	5.72754	1.56809	11.9611	2.97286	0.496863	2.52566	0.849574	2600.3	54.0453	2601.36	27.8639	2602.17	26.1347	2602.17	26.1347	99.9281
215	44.9292	252172	1.24796	5.7194	1.71165	11.8844	4.93294	0.492976	4.62646	0.937871	2583.54	98.4857	2595.33	46.2326	2604.54	28.5215	2604.54	28.5215	99.1936
204	109.388	178907	1.33123	5.717	1.51784	11.7624	3.00785	0.487712	2.59679	0.863338	2560.77	54.8795	2585.68	28.1553	2605.24	25.2895	2605.24	25.2895	98.293
169	54.8089	63331	1.9406	5.7161	1.82432	11.5885	3.38208	0.480425	2.84787	0.842045	2529.12	59.5785	2571.75	31.6234	2605.5	30.3966	2605.5	30.3966	97.0683
75	57.6692	38212.6	1.44075	5.70834	1.69618	11.7879	3.29629	0.488029	2.8264	0.857448	2562.15	59.7584	2587.71	30.8622	2607.77	28.2548	2607.77	28.2548	98.2506
156	58.5032	164582	2.45297	5.63093	1.67173	11.8334	3.32448	0.48327	2.87358	0.864371	2541.49	60.3565	2591.31	31.1356	2630.48	27.7869	2630.48	27.7869	96.617
56	126.939	319715	1.18355	5.50532	1.42001	12.9279	2.84402	0.516188	2.46415	0.866431	2682.99	54.0817	2674.41	26.8106	2667.91	23.5179	2667.91	23.5179	100.565
275	65.4568	167975	1.05579	5.45948	1.64135	12.0459	4.32652	0.476968	4.0031	0.925245	2514.05	83.3406	2607.99	40.585	2681.75	27.1493	2681.75	27.1493	93.7465
103	41.0603	71453.3	1.77876	5.45721	1.46818	12.6739	3.18654	0.501624	2.82816	0.887534	2620.77	60.9049	2655.72	29.9981	2682.44	24.2826	2682.44	24.2826	97.701
9	90.3338	85321.2	1.70459	5.45275	1.78815	12.6498	3.69941	0.500264	3.23854	0.875421	2614.93	69.617	2653.93	34.8249	2683.79	29.5726	2683.79	29.5726	97.4342
189	141.491	126323	1.72616	5.43218	1.19287	13.4743	2.57648	0.530859	2.2837	0.886367	2745.07	51.0518	2713.48	24.3584	2690.03	19.7141	2690.03	19.7141	102.046
225	58.8673	195808	1.16468	5.41833	2.34265	12.1496	4.2233	0.47745	3.514	0.832052	2516.15	73.2072	2616.03	39.6416	2694.25	38.7082	2694.25	38.7082	93.3895
237	87.495	119204	0.960031	5.38647	1.53863	12.8026	3.21822	0.500152	2.82658	0.878306	2614.45	60.7519	2665.24	30.3188	2703.99	25.3967	2703.99	25.3967	96.6885
78	36.8854	120668	2.77898	5.37414	2.02248	12.9599	3.99721	0.505137	3.44779	0.862549	2635.84	74.5953	2676.74	37.6969	2707.77	33.3706	2707.77	33.3706	97.3433
176	79.214	107008	1.58021	5.35994	1.27822	12.7802	2.11798	0.496816	1.68879	0.797356	2600.1	36.1347	2663.58	19.9476	2712.14	21.0847	2712.14	21.0847	95.8688
89	71.7923	392077	1.66245	5.35171	1.81005	12.7818	4.62748	0.496117	4.25879	0.920326	2597.09	91.0441	2663.71	43.6041	2714.67	29.8451	2714.67	29.8451	95.6686
234	83.8093	92170.5	3.08326	5.34607	1.45211	13.1166	2.90998	0.508575	2.52177	0.866596	2650.54	54.8054	2688.08	27.461	2716.41	23.9404	2716.41	23.9404	97.5752
67	43.9256	96497	1.32759	5.1741	1.96174	14.2781	3.74663	0.535803	3.192	0.851964	2765.85	71.7907	2768.36	35.5672	2770.18	32.1853	2770.18	32.1853	99.8438
162	45.7427	55908.6	0.900773	4.39475	1.27505	18.004	4.69245	0.573854	4.51589	0.962375	2923.63	106.154	2989.95	45.1689	3034.85	20.4357	3034.85	20.4357	96.3352
187	31.5006	30601.6	0.561076	4.17592	1.87219	19.8861	2.90745	0.602283	2.22445	0.765086	3039.03	53.9029	3085.84	28.1154	3116.43	29.8074	3116.43	29.8074	97.5165
206	236.467	602587	1.7113	3.86959	1.14046	22.5063	2.26267	0.631637	1.95423	0.863685	3156.06	48.7694	3205.84	22.0008	3237.12	17.9844	3237.12	17.9844	97.4959
Rejected Analyses: >10% discordant; >5% rev discordant; >10% 2s err; grains <500 Ma-evaluated by 1s err concordance; 1200 Ma cutoff
11	1705.97	28590.8	0.358974	8.49415	1.78497	0.717039	6.37872	0.0441735	6.12388	0.960049	278.65	16.7007	548.917	27.0538	1922.01	32.0017	278.65	16.7007	NA
152	94.6895	180223	0.684607	9.63313	3.51896	0.911076	17.3704	0.0636533	17.0102	0.979265	397.805	65.6243	657.63	84.2777	1693.28	64.9006	397.805	65.6243	NA
258	26.8234	46446.5	0.676734	12.8751	2.95603	1.88258	5.61111	0.175794	4.76931	0.849978	1043.96	45.9679	1074.97	37.2259	1138.44	58.8308	1138.44	58.8308	91.7007
175	881.833	98621.6	4.27783	11.31	1.50631	1.61082	9.44236	0.132132	9.32144	0.987194	800.016	70.134	974.427	59.2206	1391.55	28.9038	1391.55	28.9038	57.4908
246	281.28	62500.8	2.10924	9.33325	1.06167	3.70962	3.61641	0.251109	3.45706	0.955937	1444.19	44.73	1573.45	28.9313	1751.38	19.4324	1751.38	19.4324	82.4603
224	394.928	233807	2.09591	9.21478	1.35697	2.95735	2.23122	0.197645	1.77115	0.793804	1162.66	18.8423	1396.74	16.9321	1774.73	24.7665	1774.73	24.7665	65.512
180	722.892	86971.4	1.50995	9.20983	2.21877	2.83563	3.18904	0.189409	2.29064	0.718284	1118.17	23.515	1365.01	23.9433	1775.71	40.4932	1775.71	40.4932	62.9705
4	56.9468	40062.1	0.610983	9.20954	2.124	3.8724	3.54316	0.258652	2.83594	0.8004	1482.94	37.5691	1607.95	28.6004	1775.77	38.7628	1775.77	38.7628	83.5101
106	289.142	56302.1	1.08603	9.17256	1.85083	3.93356	3.1051	0.261683	2.4932	0.802938	1498.45	33.3353	1620.61	25.1431	1783.1	33.7453	1783.1	33.7453	84.0361
183	374.475	89053.7	1.48784	8.9525	1.36618	3.26111	3.66994	0.211743	3.40617	0.928128	1238.1	38.3697	1471.83	28.5263	1827.25	24.7742	1827.25	24.7742	67.7573
96	288.278	221381	2.10388	8.9232	1.92116	3.95316	5.28394	0.255838	4.92231	0.931561	1468.51	64.6447	1624.64	42.8457	1833.19	34.8137	1833.19	34.8137	80.1067
50	136.749	125651	1.06975	8.84907	2.09048	4.33879	4.78875	0.278461	4.30837	0.899685	1583.61	60.4952	1700.76	39.5364	1848.3	37.8134	1848.3	37.8134	85.6792
7	395.504	161481	1.19716	8.79679	1.4558	4.27478	2.27266	0.272732	1.74518	0.7679	1554.65	24.1079	1688.52	18.7035	1859.01	26.2982	1859.01	26.2982	83.6283
165	301.203	91226.5	0.956798	8.77948	1.51907	4.24195	3.12902	0.270105	2.73554	0.874249	1541.34	37.5024	1682.18	25.716	1862.56	27.4296	1862.56	27.4296	82.7535
23	100.713	25743.8	0.809853	8.77077	1.50446	4.01469	2.49417	0.255381	1.98934	0.797596	1466.16	26.088	1637.17	20.2778	1864.36	27.1579	1864.36	27.1579	78.6419
87	303.644	201653	2.33638	8.70948	2.80367	2.29489	7.2286	0.144962	6.66274	0.921719	872.659	54.3806	1210.72	51.165	1877.01	50.5424	1877.01	50.5424	46.4921
222	100.575	73756.2	1.46674	8.65384	1.98437	4.00168	3.67397	0.25116	3.09198	0.841591	1444.45	40.0127	1634.54	29.855	1888.55	35.7198	1888.55	35.7198	76.4849
229	233.455	154335	2.24961	8.52205	1.87083	4.52971	4.2881	0.279971	3.85848	0.89981	1591.22	54.4074	1736.44	35.6814	1916.12	33.5648	1916.12	33.5648	83.0435
181	341.921	93866.7	0.956506	8.44783	1.37563	3.15362	2.39384	0.19322	1.95911	0.818396	1138.8	20.4508	1445.88	18.4568	1931.8	24.6344	1931.8	24.6344	58.9499
212	231.074	84252.9	2.83899	8.38025	1.50222	4.56582	4.57564	0.277507	4.32201	0.944571	1578.8	60.5241	1743.05	38.1307	1946.17	26.8542	1946.17	26.8542	81.1232
161	476.643	87071.6	5.74548	8.35039	2.16182	4.44685	5.50153	0.269313	5.05898	0.91956	1537.32	69.197	1721.11	45.6365	1952.55	38.6207	1952.55	38.6207	78.7337
38	267.049	608538	0.974181	8.33425	1.92374	4.3437	4.15395	0.262558	3.68165	0.8863	1502.91	49.3563	1701.7	34.2984	1956.01	34.3522	1956.01	34.3522	76.8358
293	180.893	192307	4.36922	8.19009	2.57862	5.23824	3.56901	0.311152	2.4675	0.691369	1746.38	37.7486	1858.86	30.439	1987.1	45.884	1987.1	45.884	87.8855
114	531.96	139305	0.933891	8.15114	1.60598	3.61567	5.21509	0.21375	4.96165	0.951403	1248.77	56.3291	1552.99	41.5038	1995.58	28.5463	1995.58	28.5463	62.5765
214	70.0479	108479	1.05626	8.00398	1.72025	5.5126	2.67172	0.320009	2.04422	0.765131	1789.77	31.9473	1902.56	22.9667	2027.9	30.4618	2027.9	30.4618	88.2573
205	247.686	111503	1.26453	7.82996	1.11134	5.06668	2.40742	0.287728	2.13556	0.887073	1630.17	30.7603	1830.54	20.418	2066.74	19.5918	2066.74	19.5918	78.8763
118	38.3601	25471.6	1.35558	7.81512	5.89267	5.64254	6.69309	0.319822	3.17395	0.474213	1788.86	49.5816	1922.62	57.7917	2070.08	103.935	2070.08	103.935	86.4151
37	389.363	98414.3	1.2557	7.65681	3.00143	3.23645	5.31576	0.179728	4.38734	0.825345	1065.49	43.0884	1465.94	41.2573	2106.07	52.6876	2106.07	52.6876	50.5914
41	271.103	71230.6	1.12565	7.30886	1.54196	5.65428	2.74533	0.299727	2.27139	0.827363	1689.96	33.7666	1924.42	23.6908	2187.32	26.8213	2187.32	26.8213	77.2615
238	789.713	72213.9	11.2616	7.13988	3.49591	3.46818	3.99708	0.179594	1.93785	0.484817	1064.75	19.0195	1520.01	31.5125	2227.91	60.5545	2227.91	60.5545	47.7916
167	423.016	360040	5.03207	6.80053	1.6949	6.59328	3.52065	0.325194	3.08582	0.876492	1815.05	48.8158	2058.45	31.0499	2311.85	29.0895	2311.85	29.0895	78.5104
20	648.429	215141	12.8464	6.69816	2.15915	5.25389	5.67496	0.255232	5.24817	0.924794	1465.4	68.7945	1861.4	48.4455	2337.85	36.9563	2337.85	36.9563	62.6815
274	593.903	29593.3	0.511959	6.53575	3.13628	2.0037	4.64472	0.0949789	3.42596	0.737603	584.916	19.1568	1116.76	31.4706	2379.77	53.4543	2379.77	53.4543	24.5787
17	254.942	176200	2.53086	6.44671	1.52496	7.92125	5.43283	0.370365	5.21442	0.959797	2031.12	90.8545	2222.1	49.0187	2403.11	25.9221	2403.11	25.9221	84.5204
158	91.9905	110702	1.11738	6.13645	1.54064	8.33645	2.48968	0.37102	1.95574	0.78554	2034.2	34.1183	2268.29	22.5758	2486.6	25.9677	2486.6	25.9677	81.8064
62	742.146	62728.5	0.937719	6.12674	1.38435	4.07445	5.91835	0.181049	5.75417	0.972259	1072.7	56.8645	1649.2	48.2878	2489.27	23.3263	2489.27	23.3263	43.0932
124	264.467	179376	0.842544	6.08562	1.1415	5.19685	4.7539	0.229374	4.61482	0.970744	1331.22	55.5064	1852.1	40.5022	2500.61	19.2139	2500.61	19.2139	53.2357
57	389.665	68289.6	9.70026	6.07336	1.54954	9.15716	6.89928	0.403356	6.72302	0.974452	2184.47	124.583	2353.84	63.2388	2504.01	26.0753	2504.01	26.0753	87.2391
285	447.92	131068	1.99004	6.0658	1.70251	5.21059	4.28403	0.229231	3.93121	0.917642	1330.47	47.2598	1854.35	36.511	2506.1	28.6442	2506.1	28.6442	53.0892
88	97.7465	207620	1.32767	5.88982	1.24029	9.12444	2.89462	0.389769	2.61543	0.90355	2121.76	47.2861	2350.56	26.4944	2555.5	20.7644	2555.5	20.7644	83.0269
60	293.723	989676	1.08199	4.46499	1.49012	7.65546	5.92601	0.247908	5.73561	0.967869	1427.68	73.4555	2191.39	53.2687	3009.4	23.9355	3009.4	23.9355	47.4406
244	199.58	88254.6	1.35766	3.65732	1.78611	21.4217	3.51709	0.56822	3.02981	0.861453	2900.51	70.7719	3157.87	34.1321	3325.77	27.9688	3325.77	27.9688	87.2133
15BJ10, Clarence River Group, Aichilik Formation						(n=276/312)
227	1375.12	63360.4	2.71418	17.2819	1.68625	0.532367	2.74658	0.066727	2.16802	0.78935	416.407	8.74237	433.38	9.68913	524.597	36.9976	416.407	8.74237	79.3765
36	1006.16	99344	9.11476	16.764	1.62477	0.548903	2.7213	0.0667378	2.18303	0.802199	416.472	8.80424	444.278	9.79246	590.941	35.2124	416.472	8.80424	70.476
136	426.118	58397	4.50612	18.1614	1.39313	0.511716	2.21731	0.0674027	1.72501	0.777974	420.489	7.02197	419.603	7.62121	414.713	31.1356	420.489	7.02197	101.393
54	148.92	40691.6	0.819394	18.05	1.28969	0.516208	1.95849	0.0675773	1.47389	0.752569	421.543	6.01432	422.615	6.77053	428.445	28.7754	421.543	6.01432	98.3891
274	614.098	134337	10.0199	17.6795	1.23682	0.527997	1.82077	0.0677018	1.33622	0.733875	422.295	5.46193	430.48	6.38852	474.521	27.3697	422.295	5.46193	88.9939
154	424.795	277859	1.90063	17.9255	1.10414	0.520806	2.00628	0.0677089	1.67512	0.834938	422.338	6.84789	425.69	6.97638	443.86	24.5703	422.338	6.84789	95.1511
73	129.795	29130.3	1.30616	17.8939	2.28145	0.522116	2.95305	0.0677595	1.87496	0.634923	422.643	7.67019	426.564	10.2857	447.784	50.7001	422.643	7.67019	94.3856
58	1129.88	79532.8	2.6352	17.62	1.17262	0.531588	2.43566	0.0679327	2.1348	0.876479	423.689	8.75409	432.863	8.584	482.002	25.9167	423.689	8.75409	87.9018
267	256.694	64714.6	2.43505	18.2471	1.44762	0.514493	2.05895	0.0680883	1.46412	0.711103	424.628	6.01673	421.466	7.10222	404.182	32.4134	424.628	6.01673	105.059
16	307.167	98821.3	0.909191	18.107	1.62629	0.518698	2.5875	0.0681178	2.01255	0.777796	424.806	8.27381	424.281	8.97355	421.408	36.3182	424.806	8.27381	100.806
265	627.61	61338.3	5.73338	18.0288	1.18548	0.524363	1.68409	0.0685642	1.19617	0.710274	427.499	4.94774	428.062	5.88227	431.07	26.4396	427.499	4.94774	99.1718
9	1242.63	70010.8	2.20427	17.9172	1.01414	0.528263	1.77504	0.0686467	1.45681	0.820719	427.997	6.03264	430.656	6.23013	444.886	22.5467	427.997	6.03264	96.2038
161	123.771	31637	2.49229	18.3806	2.08549	0.515161	2.65686	0.0686756	1.6461	0.619565	428.172	6.81916	421.914	9.17266	387.833	46.8244	428.172	6.81916	110.401
39	562.873	120576	15.1853	18.3237	1.12732	0.519386	2.11584	0.0690243	1.79051	0.846241	430.275	7.45265	424.741	7.34418	394.794	25.2828	430.275	7.45265	108.987
212	852.42	242897	1.76695	17.7673	1.28164	0.535714	2.14565	0.0690323	1.72082	0.802004	430.323	7.16334	435.594	7.60011	463.58	28.4229	430.323	7.16334	92.8261
128	214.744	92670.7	2.30447	18.4768	1.20832	0.515389	2.02866	0.0690653	1.62954	0.803262	430.522	6.78641	422.066	7.00578	376.107	27.1666	430.522	6.78641	114.468
6	538.478	157837	3.33059	18.0887	1.37247	0.526604	2.17774	0.0690862	1.69083	0.776412	430.648	7.04362	429.554	7.62786	423.666	30.6259	430.648	7.04362	101.648
314	1028.59	59136.5	6.48566	18.0633	1.01806	0.527348	1.84298	0.0690863	1.53627	0.83358	430.649	6.39978	430.048	6.46123	426.809	22.7043	430.649	6.39978	100.9
12	225.208	124818	2.04154	18.1585	1.58798	0.525834	2.22669	0.0692512	1.56092	0.701005	431.643	6.51699	429.041	7.79183	415.068	35.4886	431.643	6.51699	103.993
26	165.07	104632	1.55143	17.774	1.62671	0.53767	2.28575	0.0693105	1.60577	0.702512	432	6.70959	436.887	8.1156	462.745	36.0545	432	6.70959	93.356
22	479.483	102178	1.82438	18.1044	1.41721	0.528075	2.24456	0.0693392	1.74057	0.775461	432.173	7.27566	430.531	7.87627	421.732	31.6353	432.173	7.27566	102.476
253	243.43	111356	3.94901	18.3968	1.42061	0.520904	2.20044	0.0695022	1.68042	0.763672	433.156	7.03967	425.755	7.65251	385.861	31.8909	433.156	7.03967	112.257
306	324.385	125944	4.03915	18.1202	1.22904	0.529709	2.06967	0.0696144	1.66523	0.804587	433.832	6.98656	431.617	7.27723	419.788	27.4436	433.832	6.98656	103.345
315	109.735	30638.1	2.67188	18.1054	1.54335	0.531709	2.43715	0.0698202	1.8862	0.773939	435.072	7.93555	432.943	8.59053	421.61	34.4624	435.072	7.93555	103.193
102	227.586	54860	1.36668	18.1174	1.57777	0.534569	2.54081	0.0702423	1.99158	0.783835	437.615	8.4262	434.837	8.98734	420.13	35.2437	437.615	8.4262	104.162
18	558.185	158739	3.51141	18.0855	1.2892	0.535707	1.89376	0.0702677	1.38719	0.732505	437.768	5.87108	435.59	6.70781	424.069	28.7652	437.768	5.87108	103.23
86	274.73	76089.6	1.71012	18.2665	1.93101	0.530786	2.55838	0.0703192	1.67825	0.655982	438.078	7.10782	432.331	9.00766	401.803	43.256	438.078	7.10782	109.028
250	237.93	55686.8	1.87754	18.139	1.19804	0.534826	2.13331	0.0703599	1.76514	0.827419	438.324	7.47987	435.007	7.54824	417.466	26.7628	438.324	7.47987	104.996
74	1349.15	196711	3.05567	17.7468	1.29977	0.548443	2.47832	0.0705913	2.11014	0.851438	439.717	8.96927	443.976	8.91323	466.106	28.7909	439.717	8.96927	94.3384
85	1112.33	150577	1.30328	17.9724	1.37413	0.542426	2.70034	0.0707044	2.32456	0.860841	440.398	9.89546	440.023	9.64266	438.041	30.5958	440.398	9.89546	100.538
283	152.906	69194.3	1.72396	18.0208	2.27512	0.541826	2.8941	0.0708162	1.78876	0.61807	441.071	7.62585	439.628	10.3272	432.054	50.7185	441.071	7.62585	102.087
275	477.61	120240	1.44916	18.2412	1.33194	0.535492	2.06565	0.0708441	1.57888	0.764349	441.239	6.73356	435.448	7.31475	404.913	29.8196	441.239	6.73356	108.971
91	338.903	45404.1	4.25131	18.3695	1.5676	0.532798	2.20607	0.0709838	1.55221	0.70361	442.08	6.63203	433.665	7.78638	389.193	35.1748	442.08	6.63203	113.589
262	136.88	48316.7	3.60519	18.2865	2.01257	0.540239	3.00067	0.0716498	2.22567	0.741722	446.088	9.59269	438.582	10.6872	399.353	45.1035	446.088	9.59269	111.703
241	298.666	153519	4.69495	17.9889	1.47534	0.549927	1.91553	0.0717476	1.22174	0.637806	446.676	5.27244	444.949	6.90112	436.006	32.8633	446.676	5.27244	102.447
55	320.393	86834.8	9.21783	17.3741	1.38845	0.62135	2.24165	0.0782954	1.7599	0.785088	485.94	8.23766	490.693	8.72306	512.923	30.5077	485.94	8.23766	94.7394
156	503.51	155573	1.38521	16.2743	1.65551	0.924104	2.26098	0.109074	1.5399	0.681078	667.368	9.76275	664.528	11.0264	654.887	35.5376	667.368	9.76275	101.906
290	286.725	86592.2	1.62841	16.1166	0.969123	0.935255	1.61467	0.109321	1.2915	0.799852	668.801	8.20461	670.395	7.92347	675.757	20.7203	668.801	8.20461	98.9706
57	411.021	196883	1.68048	16.0529	1.33292	0.975764	2.17437	0.113605	1.7179	0.79007	693.65	11.2975	691.431	10.9041	684.239	28.4424	693.65	11.2975	101.375
201	386.882	247864	8.83573	14.5181	1.17347	1.27054	1.75399	0.133782	1.30363	0.743235	809.405	9.91608	832.633	9.96622	895.15	24.2282	809.405	9.91608	90.4212
173	139.529	73713.9	2.2242	14.4601	1.38292	1.31458	1.91369	0.137866	1.32278	0.69122	832.585	10.3317	852.138	11.0365	903.367	28.5168	832.585	10.3317	92.1646
72	464.284	117553	7.99627	14.4121	1.21144	1.37285	2.20767	0.143499	1.84559	0.835991	864.418	14.9303	877.383	12.97	910.218	24.9501	864.418	14.9303	94.9683
132	557.836	65348.9	2.01363	14.2901	1.31704	1.39005	2.31938	0.144068	1.90917	0.823137	867.622	15.4981	884.718	13.6979	927.699	27.0477	867.622	15.4981	93.5242
217	258.398	237973	10.4046	14.3782	1.06003	1.44388	1.76152	0.150569	1.40688	0.798671	904.152	11.8685	907.333	10.5678	915.103	21.8035	904.152	11.8685	98.8033
147	181.304	84004.1	3.68522	14.2834	0.953107	1.48297	1.97349	0.153625	1.72808	0.875645	921.252	14.8348	923.445	11.9687	928.673	19.5893	921.252	14.8348	99.2009
263	146.161	193832	3.83804	13.8711	1.24619	1.54506	1.77582	0.155437	1.26514	0.712422	931.369	10.9714	948.524	10.947	988.57	25.3341	931.369	10.9714	94.2137
43	267.367	245478	52.3829	14.1727	1.0233	1.51596	2.00546	0.155826	1.72474	0.860022	933.538	14.9896	936.847	12.2701	944.617	20.9589	933.538	14.9896	98.8271
218	256.023	232363	8.17134	13.9597	1.36699	1.54776	2.44952	0.156704	2.0326	0.829796	938.432	17.7512	949.601	15.1108	975.583	27.8663	938.432	17.7512	96.1919
305	268.965	51933.8	2.38907	14.0693	0.816574	1.53795	1.53973	0.156933	1.30537	0.847788	939.71	11.4145	945.685	9.47432	959.605	16.6979	939.71	11.4145	97.9267
236	262.926	284947	9.88828	13.9596	1.47545	1.55437	2.59154	0.157371	2.13052	0.822107	942.153	18.6749	952.232	16.0138	975.595	30.069	942.153	18.6749	96.5721
130	157.048	53903	7.11959	14.1149	1.03529	1.54653	2.01416	0.15832	1.72772	0.857787	947.432	15.2229	949.109	12.4209	952.983	21.1695	947.432	15.2229	99.4176
140	368.905	169032	12.4929	13.6904	1.7869	1.59864	2.78722	0.158732	2.13906	0.767454	949.729	18.8897	969.68	17.412	1015.16	36.2271	949.729	18.8897	93.555
8	224.028	109240	9.87413	13.923	1.41571	1.57243	2.36313	0.158783	1.89213	0.800689	950.008	16.7137	959.388	14.6682	980.97	28.824	950.008	16.7137	96.8437
21	572.2	250798	13.5012	13.9864	1.05559	1.56595	2.10704	0.158849	1.82356	0.865457	950.377	16.1137	956.825	13.0574	971.66	21.5223	950.377	16.1137	97.8096
24	373.476	115016	10.5936	14.0674	1.02167	1.55884	1.7952	0.159043	1.47611	0.822258	951.458	13.0573	954.008	11.105	959.911	20.8762	951.458	13.0573	99.1195
151	189.683	193855	8.06672	14.0405	1.15381	1.5645	1.96669	0.159315	1.59267	0.809822	952.971	14.1091	956.25	12.1831	963.82	23.5453	952.971	14.1091	98.8744
178	205.393	71063.4	10.149	14.106	1.38533	1.55801	2.08392	0.159394	1.55679	0.747049	953.41	13.7972	953.676	12.8885	954.273	28.3492	953.41	13.7972	99.9096
199	728.669	138719	16.0684	14.109	1.24285	1.55774	2.48763	0.159401	2.15491	0.866249	953.446	19.0988	953.57	15.3847	953.85	25.401	953.446	19.0988	99.9577
296	246.989	150385	9.00209	13.9219	1.09998	1.5794	2.15263	0.159473	1.85037	0.859584	953.848	16.4061	962.131	13.3844	981.13	22.4035	953.848	16.4061	97.2194
167	125.762	73061.3	1.86529	14.2306	1.17661	1.54537	2.67638	0.159498	2.40387	0.89818	953.985	21.3165	948.649	16.5005	936.271	24.1498	953.985	21.3165	101.892
157	300.424	92532.2	9.75689	14.2504	1.25652	1.54858	2.13451	0.160051	1.72549	0.808374	957.062	15.3466	949.927	13.1701	933.41	25.7805	957.062	15.3466	102.534
25	252.308	150764	1.99144	13.9369	1.11196	1.5881	2.24693	0.160525	1.9525	0.868962	959.694	17.41	965.552	14.0005	978.893	22.6555	959.694	17.41	98.0387
194	239.512	225989	7.52426	14.2265	1.31045	1.55595	2.37238	0.160543	1.97761	0.833595	959.795	17.6356	952.862	14.6652	936.89	26.8929	959.795	17.6356	102.445
46	310.027	195832	3.46975	14.2508	1.2164	1.56022	2.19056	0.161258	1.82179	0.831655	963.766	16.3084	954.554	13.5556	933.366	24.9587	963.766	16.3084	103.257
198	118.606	3.11092e+07	2.12923	13.8775	1.0838	1.60853	1.75658	0.161898	1.38237	0.786967	967.315	12.417	973.537	10.9989	987.603	22.033	967.315	12.417	97.9457
304	393.685	52078.8	3.13823	13.9122	1.30089	1.60943	1.94347	0.162393	1.44387	0.742935	970.064	13.0036	973.887	12.1718	982.539	26.4912	970.064	13.0036	98.7304
135	32.7051	16924.9	0.925125	14.0556	2.43534	1.59774	3.23548	0.162875	2.13013	0.658366	972.731	19.233	969.326	20.2086	961.634	49.7556	972.731	19.233	101.154
279	142.511	80168	1.51713	14.1634	1.05794	1.59894	1.75086	0.164248	1.39509	0.796802	980.339	12.6874	969.797	10.9379	945.989	21.6451	980.339	12.6874	103.631
187	18.1288	126826	0.76875	13.4308	2.22979	1.695	3.15109	0.165109	2.22653	0.706589	985.108	20.3401	1006.65	20.1261	1053.86	44.9355	985.108	20.3401	93.4762
66	350.975	76589.3	3.50363	13.7934	1.02452	1.66044	1.64763	0.166109	1.29036	0.783164	990.637	11.8491	993.543	10.4418	999.947	20.8072	990.637	11.8491	99.069
67	361.866	71379.2	3.54132	13.4954	1.01078	1.72491	2.22905	0.16883	1.9867	0.891278	1005.66	18.4991	1017.86	14.3282	1044.16	20.4089	1005.66	18.4991	96.3133
153	102.049	133112	1.49619	13.7253	1.06058	1.70445	1.68216	0.169671	1.30569	0.776199	1010.3	12.2096	1010.2	10.7651	1009.99	21.4904	1010.3	12.2096	100.031
272	236.528	56129	7.0866	13.5708	0.975739	1.73572	1.53611	0.170837	1.18641	0.772347	1016.72	11.1593	1021.87	9.89632	1032.91	19.7366	1016.72	11.1593	98.4328
2	113.759	135133	2.81628	13.7205	1.38195	1.71866	2.38465	0.171025	1.94339	0.814959	1017.75	18.2966	1015.52	15.3081	1010.7	28.0024	1017.75	18.2966	100.698
190	56.1218	39748	2.47636	13.6424	1.41224	1.74189	2.66811	0.17235	2.26371	0.848433	1025.05	21.4533	1024.16	17.2126	1022.26	28.6037	1025.05	21.4533	100.273
119	25.917	46286.3	2.28954	13.6755	2.42925	1.76955	2.76341	0.175511	1.31726	0.47668	1042.4	12.6785	1034.35	17.9298	1017.36	49.2261	1042.4	12.6785	102.462
69	96.1349	124246	1.22965	13.2858	1.49637	1.83443	2.71723	0.176761	2.26809	0.834705	1049.26	21.9623	1057.87	17.8581	1075.7	30.0362	1049.26	21.9623	97.5419
101	403.48	213222	3.01785	13.4242	1.10979	1.81622	1.85602	0.176829	1.48768	0.80154	1049.63	14.4101	1051.32	12.1545	1054.86	22.3711	1049.63	14.4101	99.5039
189	216.05	96054.8	2.32412	13.7166	1.30853	1.77915	2.4047	0.176994	2.0175	0.838984	1050.53	19.5577	1037.87	15.6324	1011.28	26.5301	1050.53	19.5577	103.881
237	598.28	2.47654e+06	4.15972	13.0354	1.1147	1.87431	2.53183	0.1772	2.27324	0.897862	1051.66	22.0586	1072.05	16.7653	1113.75	22.2729	1051.66	22.0586	94.4252
96	26.675	45132.7	1.24833	13.4364	2.46131	1.82353	3.0727	0.177704	1.83941	0.598631	1054.42	17.892	1053.96	20.1524	1053.02	49.6043	1054.42	17.892	100.132
193	450.366	609198	4.00889	13.3118	1.36423	1.84399	2.2228	0.17803	1.75491	0.789506	1056.2	17.0967	1061.28	14.6349	1071.77	27.4077	1056.2	17.0967	98.5474
90	124.434	194199	0.862002	12.9564	1.39803	1.89554	2.05072	0.178121	1.50032	0.731607	1056.7	14.6227	1079.53	13.6322	1125.9	27.8623	1056.7	14.6227	93.8537
297	106.677	109546	2.01009	13.1509	1.1262	1.87171	1.96656	0.178523	1.61215	0.819781	1058.9	15.7427	1071.13	13.0154	1096.14	22.5435	1058.9	15.7427	96.6021
246	88.9432	59567.2	2.05346	13.3839	1.15821	1.84053	2.12626	0.178659	1.78313	0.83862	1059.64	17.4236	1060.05	13.99	1060.9	23.3259	1059.64	17.4236	99.8813
129	31.9502	40752.8	0.681868	13.1951	1.62591	1.8699	2.17406	0.17895	1.44324	0.663847	1061.23	14.1219	1070.49	14.3841	1089.39	32.5774	1061.23	14.1219	97.4153
110	258.793	93510.5	1.80255	13.2341	1.19963	1.86647	1.94609	0.17915	1.53236	0.787408	1062.33	15.0082	1069.28	12.8673	1083.47	24.0438	1062.33	15.0082	98.0482
93	39.672	61437.8	1.56124	12.9732	2.45174	1.90504	3.11165	0.179247	1.91606	0.615771	1062.86	18.7748	1082.85	20.722	1123.3	48.8856	1062.86	18.7748	94.6195
146	62.9723	53511.6	2.00888	13.4246	1.94085	1.85926	2.50993	0.181026	1.59149	0.634077	1072.58	15.7255	1066.72	16.5736	1054.79	39.1121	1072.58	15.7255	101.686
83	75.2661	887675	1.64448	13.1694	1.248	1.90018	1.99878	0.181493	1.56129	0.78112	1075.12	15.4607	1081.15	13.2981	1093.31	24.9918	1075.12	15.4607	98.337
29	92.8003	65030.6	1.79101	13.2717	1.38947	1.88594	2.16526	0.181532	1.66065	0.766948	1075.34	16.4476	1076.16	14.3685	1077.8	27.8786	1075.34	16.4476	99.7717
203	64.8975	107629	2.25942	13.3489	1.45309	1.88108	2.36401	0.182118	1.8647	0.788785	1078.53	18.5191	1074.44	15.6735	1066.17	29.2374	1078.53	18.5191	101.159
204	258.439	154134	3.75136	13.0967	1.22285	1.91805	2.38917	0.182188	2.05251	0.859087	1078.92	20.3909	1087.39	15.947	1104.41	24.459	1078.92	20.3909	97.6916
155	202.313	202322	2.57857	13.4417	1.27962	1.8716	2.18549	0.182459	1.7717	0.810666	1080.4	17.6234	1071.1	14.4643	1052.23	25.7921	1080.4	17.6234	102.676
205	76.2907	47509.4	3.42698	13.328	1.77344	1.89003	2.35525	0.182697	1.54987	0.658048	1081.69	15.4337	1077.59	15.6411	1069.33	35.6613	1081.69	15.4337	101.156
255	80.0115	39973	1.84687	12.9619	1.34115	1.94909	2.34167	0.183231	1.91957	0.819743	1084.6	19.1624	1098.13	15.7157	1125.04	26.7117	1084.6	19.1624	96.4055
32	82.4304	89968.4	1.41895	13.3464	1.39369	1.90812	2.11778	0.184701	1.59456	0.752941	1092.61	16.0259	1083.93	14.1102	1066.55	28.0405	1092.61	16.0259	102.443
49	55.3222	67509.5	1.3209	12.9665	1.90634	1.97178	2.95604	0.18543	2.25921	0.76427	1096.57	22.7815	1105.92	19.9177	1124.36	37.9933	1096.57	22.7815	97.5284
42	167.494	131556	1.71252	13.0576	1.35448	1.97738	2.2907	0.187263	1.84735	0.806455	1106.53	18.7833	1107.83	15.4485	1110.36	27.074	1106.53	18.7833	99.6553
94	114.482	33851.7	3.33117	12.8538	1.24261	2.0099	1.89181	0.187373	1.42649	0.754033	1107.13	14.5113	1118.86	12.8278	1141.73	24.6876	1107.13	14.5113	96.9689
195	240.151	104349	2.87376	13.1015	1.08294	1.97379	1.87504	0.187552	1.53068	0.816349	1108.1	15.5838	1106.6	12.6373	1103.66	21.6561	1108.1	15.5838	100.403
103	216.066	188307	2.1616	13.28	1.30849	1.95059	2.2235	0.187873	1.79772	0.808511	1109.84	18.3289	1098.65	14.9264	1076.57	26.2637	1109.84	18.3289	103.091
150	547.777	214714	1.25713	12.7399	0.995605	2.04273	1.76368	0.188745	1.4558	0.82543	1114.57	14.9007	1129.87	12.0231	1159.38	19.7621	1114.57	14.9007	96.1355
53	312.558	89859.1	0.823507	12.8028	1.15719	2.03408	2.29013	0.188874	1.97626	0.862946	1115.27	20.2395	1126.98	15.5907	1149.61	23.0007	1115.27	20.2395	97.013
158	38.4705	139280	2.42035	13.169	1.93812	1.9808	2.75105	0.189187	1.95243	0.709701	1116.97	20.0232	1108.99	18.5646	1093.41	38.8136	1116.97	20.0232	102.155
51	133.776	128631	5.01123	12.8735	1.77105	2.03332	2.67971	0.189846	2.01102	0.750462	1120.54	20.6846	1126.73	18.2411	1138.69	35.2433	1120.54	20.6846	98.4063
116	168.275	101881	2.81927	12.8134	1.59313	2.04921	2.4809	0.190436	1.90179	0.766572	1123.74	19.6122	1132.03	16.9309	1147.96	31.6473	1123.74	19.6122	97.8896
149	80.7954	96758.2	1.63398	13.1178	1.57027	2.01342	2.18358	0.191555	1.51733	0.694882	1129.8	15.7246	1120.04	14.8151	1101.16	31.3977	1129.8	15.7246	102.601
77	209.653	102771	3.34355	12.9504	1.2427	2.04214	2.15636	0.191808	1.76227	0.817242	1131.16	18.2832	1129.68	14.699	1126.81	24.7427	1131.16	18.2832	100.387
285	218.029	147645	2.245	12.7037	1.15314	2.10743	1.94237	0.19417	1.56303	0.804703	1143.93	16.3834	1151.24	13.3764	1165.01	22.8567	1143.93	16.3834	98.1899
260	373.873	209673	3.5753	12.8339	1.16684	2.09173	1.88276	0.1947	1.47759	0.7848	1146.78	15.5231	1146.1	12.9346	1144.77	23.1806	1146.78	15.5231	100.176
166	271.425	67728.9	1.37698	12.8749	1.02002	2.0872	1.97031	0.194898	1.68573	0.855564	1147.85	17.7249	1144.61	13.5266	1138.48	20.2716	1147.85	17.7249	100.824
307	200.416	53706.7	3.41753	12.796	0.913725	2.12636	1.55662	0.197337	1.26022	0.809591	1161	13.3893	1157.4	10.7504	1150.68	18.1326	1161	13.3893	100.897
95	419.097	80237	2.3335	12.5846	1.35574	2.17338	2.29197	0.198369	1.848	0.806294	1166.55	19.7199	1172.56	15.94	1183.69	26.808	1166.55	19.7199	98.5517
159	354.786	232035	3.78791	12.5755	1.17874	2.17984	2.02809	0.198814	1.65036	0.813755	1168.95	17.6439	1174.63	14.1177	1185.13	23.3078	1168.95	17.6439	98.6349
109	113.801	129726	2.11605	12.6056	1.60433	2.18564	2.51572	0.19982	1.93777	0.770267	1174.35	20.8039	1176.48	17.5274	1180.4	31.7192	1174.35	20.8039	99.4877
289	26.7764	218398	2.62181	12.6436	1.95647	2.17991	2.87537	0.199897	2.10712	0.732818	1174.77	22.6294	1174.65	20.0172	1174.45	38.7144	1174.77	22.6294	100.027
139	164.097	176236	0.335302	12.619	1.39187	2.2179	2.16642	0.202986	1.66014	0.766308	1191.34	18.058	1186.71	15.1626	1178.3	27.5176	1191.34	18.058	101.107
82	88.1154	116203	2.02621	12.4539	1.33218	2.25215	1.84147	0.203423	1.27134	0.690393	1193.68	13.8536	1197.46	12.9493	1204.25	26.2466	1193.68	13.8536	99.1224
118	79.3737	37443.9	2.29618	12.426	1.394	2.31002	1.9395	0.208183	1.34849	0.695278	1219.13	14.9789	1215.37	13.7446	1208.71	27.4473	1208.71	27.4473	100.862
313	463.241	60706.5	1.7847	12.3966	0.826985	2.3351	1.72755	0.209946	1.51675	0.877976	1228.53	16.9658	1223.03	12.2823	1213.32	16.2711	1213.32	16.2711	101.254
105	50.5332	82278.1	1.71678	12.3936	2.1177	2.17428	3.01928	0.19544	2.15208	0.712777	1150.78	22.681	1172.85	21.0023	1213.83	41.668	1213.83	41.668	94.8055
44	102.803	112708	1.97551	12.5678	1.20775	2.2872	2.19906	0.208478	1.83772	0.835683	1220.7	20.4371	1208.34	15.5374	1186.33	23.8758	1220.7	20.4371	102.897
254	103.291	86119.6	3.86523	12.33	1.32557	2.33231	2.05472	0.208568	1.56994	0.764068	1221.18	17.4654	1222.18	14.6034	1223.93	26.0512	1223.93	26.0512	99.7755
261	273.206	237775	4.05974	12.2856	1.05597	2.34249	2.00638	0.208725	1.70602	0.850297	1222.02	18.9911	1225.28	14.2784	1231.04	20.7135	1231.04	20.7135	99.2675
286	84.67	107425	3.33077	12.2205	1.10661	2.28445	1.88457	0.202474	1.52546	0.809446	1188.6	16.5582	1207.49	13.3103	1241.43	21.6976	1241.43	21.6976	95.7441
52	206.07	134830	3.04112	12.2037	1.27565	2.38203	2.38841	0.210833	2.01921	0.845422	1233.25	22.665	1237.22	17.0824	1244.15	24.9717	1244.15	24.9717	99.1241
113	238.75	221156	2.61203	12.1794	1.24893	2.36304	2.16631	0.208736	1.77004	0.817078	1222.08	19.7047	1231.5	15.4569	1248.05	24.4527	1248.05	24.4527	97.9189
244	308.374	90647.3	2.01635	12.1745	1.15217	2.37819	1.82888	0.209988	1.42031	0.776604	1228.76	15.8897	1236.07	13.0738	1248.85	22.573	1248.85	22.573	98.3907
75	324.981	150577	2.40395	12.1684	1.43656	2.43914	2.1643	0.215262	1.61879	0.747951	1256.79	18.4845	1254.22	15.5872	1249.83	28.1187	1249.83	28.1187	100.557
3	722.008	646327	1.37366	12.1651	1.21514	2.39482	1.97152	0.211295	1.55251	0.787473	1235.71	17.458	1241.05	14.1226	1250.33	23.7937	1250.33	23.7937	98.8312
228	590.118	876999	3.22204	12.1227	1.20974	2.42868	1.88064	0.213536	1.43991	0.765648	1247.63	16.3332	1251.13	13.5271	1257.18	23.6359	1257.18	23.6359	99.2398
143	63.4357	90246.7	1.38512	12.0693	1.40695	2.51727	2.46409	0.22035	2.02293	0.820964	1283.72	23.5467	1277.03	17.9084	1265.77	27.4584	1265.77	27.4584	101.418
30	230.453	148351	2.75334	12.003	1.26531	2.50036	2.22222	0.217666	1.82682	0.822068	1269.53	21.0513	1272.14	16.1192	1276.53	24.6542	1276.53	24.6542	99.452
186	29.573	140348	1.69002	11.8861	2.03737	2.44451	2.80928	0.210732	1.93421	0.688508	1232.71	21.7023	1255.81	20.2464	1295.59	39.6041	1295.59	39.6041	95.147
169	174.102	83729.5	1.71473	11.8151	1.07373	2.56183	1.94714	0.219526	1.62433	0.834215	1279.37	18.8491	1289.81	14.2211	1307.22	20.8452	1307.22	20.8452	97.8695
41	113.47	104434	2.55546	11.7855	1.32864	2.6742	2.14331	0.228581	1.68181	0.784681	1327.06	20.1713	1321.35	15.8409	1312.1	25.7772	1312.1	25.7772	101.14
163	630.479	163245	4.00092	11.7138	0.923523	2.6256	1.65101	0.223063	1.36855	0.828919	1298.04	16.0901	1307.83	12.1409	1323.92	17.8867	1323.92	17.8867	98.0452
221	135.265	97215.4	2.16578	11.7003	1.44005	2.73693	2.64172	0.232252	2.21471	0.838359	1346.29	26.9091	1338.54	19.6481	1326.16	27.8845	1326.16	27.8845	101.518
121	169.673	308392	6.27131	11.5572	1.16685	2.83704	2.56928	0.237802	2.28903	0.890924	1375.26	28.3489	1365.39	19.2914	1349.95	22.5198	1349.95	22.5198	101.875
268	228.397	85600	2.70727	11.5543	1.09304	2.69451	1.94191	0.225798	1.60508	0.826547	1312.44	19.0598	1326.95	14.3817	1350.43	21.0927	1350.43	21.0927	97.1866
175	116.194	84637.5	1.94639	11.5467	1.55455	2.81201	2.26632	0.23549	1.64911	0.727662	1363.21	20.2629	1358.74	16.9767	1351.7	29.9943	1351.7	29.9943	100.851
134	189.992	85672.9	2.7886	11.5368	1.29385	2.84685	1.77386	0.238205	1.21349	0.684093	1377.36	15.0492	1367.98	13.3301	1353.35	24.959	1353.35	24.959	101.774
170	107.081	231572	3.01324	11.5336	1.1611	2.82334	2.041	0.236172	1.67855	0.822415	1366.76	20.673	1361.76	15.3048	1353.89	22.3955	1353.89	22.3955	100.951
216	155.18	151622	2.11065	11.369	1.16805	2.66177	2.02296	0.219479	1.65167	0.816464	1279.12	19.1629	1317.91	14.9323	1381.55	22.4434	1381.55	22.4434	92.5857
184	136.857	77564.3	2.32459	11.3397	1.24525	2.74194	2.19876	0.225505	1.81215	0.824171	1310.9	21.4959	1339.9	16.3608	1386.52	23.9106	1386.52	23.9106	94.5461
99	187.753	114600	2.17517	11.3272	1.32014	2.87989	2.14154	0.23659	1.68624	0.787397	1368.94	20.7974	1376.66	16.1417	1388.64	25.3414	1388.64	25.3414	98.5816
76	317.034	1.66607e+06	2.94298	11.3076	1.09113	2.94914	1.98208	0.241859	1.65472	0.834838	1396.35	20.7747	1394.63	15.0306	1391.97	20.9343	1391.97	20.9343	100.315
294	136.015	155312	2.27402	11.2601	1.22456	2.95545	2.28707	0.24136	1.93161	0.84458	1393.76	24.2107	1396.25	17.3532	1400.02	23.4688	1400.02	23.4688	99.5529
209	437.83	223062	1.92461	11.2492	1.06993	2.94512	1.89684	0.240284	1.56629	0.825735	1388.17	19.5612	1393.59	14.3792	1401.88	20.4999	1401.88	20.4999	99.0219
124	116.691	84453	2.56725	11.2095	1.30787	2.96961	2.17355	0.241426	1.73603	0.798708	1394.11	21.7641	1399.88	16.5116	1408.65	25.036	1408.65	25.036	98.9676
117	146.055	85703	4.22603	11.188	0.870124	3.07414	1.53907	0.249446	1.26949	0.824846	1435.62	16.3384	1426.27	11.7922	1412.32	16.6478	1412.32	16.6478	101.65
164	138.445	66779.3	2.86052	11.1338	1.41344	2.77416	2.77303	0.224014	2.38577	0.860348	1303.05	28.1474	1348.61	20.6993	1421.61	27.0095	1421.61	27.0095	91.6599
245	119.507	771736	1.06371	11.0907	1.32472	3.12072	2.18529	0.251023	1.73799	0.795313	1443.75	22.4809	1437.81	16.8058	1429.02	25.2886	1429.02	25.2886	101.031
79	250.281	190100	2.51227	11.0555	1.35292	3.05764	1.96987	0.245168	1.43178	0.72684	1413.51	18.1732	1422.15	15.0734	1435.09	25.8058	1435.09	25.8058	98.4963
168	104.926	141012	3.20902	11.0294	1.25593	3.20707	2.08443	0.256542	1.66357	0.798095	1472.13	21.8949	1458.87	16.1355	1439.59	23.9411	1439.59	23.9411	102.26
64	33.3699	105475	2.98985	11.0258	1.67597	3.05692	2.32075	0.244452	1.60531	0.691719	1409.8	20.328	1421.97	17.7578	1440.21	31.9464	1440.21	31.9464	97.8887
206	367.171	370430	6.75832	11.0191	1.09817	3.11984	2.11641	0.249331	1.80921	0.854846	1435.03	23.276	1437.59	16.2749	1441.38	20.9285	1441.38	20.9285	99.5594
131	51.1338	99943.2	0.826531	11.0032	1.27293	3.27521	2.31052	0.261371	1.92825	0.834552	1496.85	25.7572	1475.18	17.9749	1444.12	24.2504	1444.12	24.2504	103.652
144	181.608	282521	2.62452	10.9799	1.06966	3.17984	1.94997	0.253223	1.6304	0.836118	1455.07	21.2368	1452.27	15.0638	1448.16	20.3665	1448.16	20.3665	100.477
292	43.0148	70957.7	1.91361	10.9771	1.43574	3.1144	2.24654	0.247947	1.72789	0.769134	1427.88	22.1309	1436.25	17.2685	1448.66	27.3355	1448.66	27.3355	98.5658
28	117.333	161097	0.865485	10.952	0.896344	3.05497	1.89691	0.24266	1.67177	0.881315	1400.51	21.0447	1421.48	14.5119	1453.01	17.0553	1453.01	17.0553	96.3867
225	598.872	84162.1	3.20249	10.9022	1.18658	3.22642	2.22947	0.255114	1.88748	0.846604	1464.8	24.7317	1463.53	17.2831	1461.67	22.5518	1461.67	22.5518	100.214
242	54.7975	135192	2.36372	10.8811	1.74063	3.27711	2.58478	0.25862	1.91083	0.739262	1482.78	25.311	1475.63	20.1118	1465.36	33.0669	1465.36	33.0669	101.189
280	578.193	102955	9.92634	10.7692	1.18215	3.05858	2.15765	0.238892	1.80498	0.836552	1380.93	22.4368	1422.38	16.5118	1484.97	22.3974	1484.97	22.3974	92.994
252	145.927	147133	1.4594	10.7609	1.1735	3.16851	1.75172	0.247288	1.30055	0.742442	1424.47	16.622	1449.52	13.5206	1486.42	22.2292	1486.42	22.2292	95.8323
256	196.04	77515.3	2.9157	10.7602	0.85818	3.28928	1.66987	0.256696	1.43247	0.857837	1472.91	18.8623	1478.52	13.0032	1486.55	16.2557	1486.55	16.2557	99.0825
111	784.778	107168	2.90426	10.7488	1.30506	3.25752	2.37656	0.253948	1.98617	0.835733	1458.8	25.93	1470.97	18.4653	1488.56	24.7144	1488.56	24.7144	98.0013
258	399.622	231369	2.29673	10.7486	0.955561	3.35523	1.84677	0.26156	1.58034	0.85573	1497.82	21.1219	1494.01	14.4472	1488.6	18.0954	1488.6	18.0954	100.62
176	254.783	139282	3.80628	10.7288	1.08051	3.29972	2.03268	0.256759	1.72172	0.847016	1473.24	22.6754	1480.99	15.8406	1492.08	20.4522	1492.08	20.4522	98.7371
162	235.165	147575	3.21891	10.7181	1.09227	3.385	1.57557	0.263134	1.13549	0.72069	1505.86	15.2487	1500.93	12.3503	1493.96	20.6697	1493.96	20.6697	100.796
112	68.5256	113783	1.99449	10.6915	1.19273	3.41464	2.15046	0.264779	1.78938	0.832092	1514.25	24.1486	1507.77	16.8909	1498.66	22.555	1498.66	22.555	101.04
27	222.648	57097.9	2.8019	10.6772	1.1212	3.33871	2.38913	0.258544	2.10971	0.883044	1482.39	27.9389	1490.15	18.6697	1501.2	21.195	1501.2	21.195	98.7466
50	43.3178	86885	1.01507	10.6619	1.58711	3.36335	2.12112	0.260079	1.40721	0.663429	1490.25	18.7235	1495.9	16.603	1503.91	29.9933	1503.91	29.9933	99.0912
59	173.444	51454.9	2.86992	10.6507	1.43378	3.38948	2.20511	0.261823	1.67534	0.759755	1499.16	22.4096	1501.97	17.2911	1505.91	27.0881	1505.91	27.0881	99.5523
63	239.708	64997	4.16971	10.6258	1.26304	3.34593	1.83467	0.257856	1.33068	0.7253	1478.86	17.5849	1491.84	14.3433	1510.32	23.8479	1510.32	23.8479	97.9172
220	177.766	209132	0.930355	10.6135	1.4949	3.35976	2.90989	0.258621	2.49655	0.857952	1482.78	33.0698	1495.07	22.7733	1512.51	28.2182	1512.51	28.2182	98.0346
180	243.081	83550	1.96638	10.5837	1.00693	3.34286	1.86186	0.256598	1.56609	0.841139	1472.41	20.6154	1491.12	14.5529	1517.82	18.9927	1517.82	18.9927	97.0085
214	427.895	123901	1.79546	10.5769	1.09905	3.38071	2.15248	0.259337	1.85074	0.859819	1486.45	24.5691	1499.94	16.8683	1519.02	20.7272	1519.02	20.7272	97.8559
240	969.78	257097	1.12441	10.5439	0.956541	3.383	1.6186	0.258703	1.30571	0.806694	1483.2	17.3	1500.47	12.6859	1524.92	18.0251	1524.92	18.0251	97.2643
171	459.946	238506	3.30936	10.4827	1.0262	3.53887	1.84361	0.269052	1.53161	0.830765	1535.99	20.9327	1535.95	14.5964	1535.87	19.31	1535.87	19.31	100.007
92	225.061	83053.8	1.35875	10.471	1.3104	3.40138	2.32472	0.258311	1.9202	0.825992	1481.2	25.4111	1504.72	18.2438	1537.97	24.6518	1537.97	24.6518	96.3085
238	123.438	73131.6	1.68261	10.4187	1.3809	3.582	2.66034	0.270668	2.27388	0.854732	1544.19	31.2244	1545.55	21.1203	1547.39	25.9476	1547.39	25.9476	99.7931
311	402.772	55514.3	2.16073	10.3797	1.25476	3.51711	2.20101	0.264771	1.80832	0.821586	1514.21	24.4036	1531.07	17.4028	1554.43	23.5537	1554.43	23.5537	97.4125
248	153.631	847963	3.57407	10.3371	1.05793	3.40466	2.0158	0.255253	1.71588	0.851214	1465.51	22.4929	1505.47	15.8224	1562.15	19.8383	1562.15	19.8383	93.8138
68	169.504	55690.7	3.94004	10.2696	1.2982	3.43066	3.26783	0.255522	2.9989	0.917704	1466.89	39.345	1511.45	25.6975	1574.43	24.3054	1574.43	24.3054	93.1698
114	95.0852	105548	5.61638	10.2165	1.56236	3.72721	2.51144	0.276174	1.96631	0.782942	1572.07	27.4313	1577.23	20.1089	1584.12	29.215	1584.12	29.215	99.2388
37	478.883	242514	2.13398	10.2026	1.33844	3.35525	2.2855	0.248277	1.85259	0.810585	1429.58	23.7534	1494.02	17.88	1586.66	25.0189	1586.66	25.0189	90.1003
5	29.4317	29683.6	1.204	10.119	1.53222	3.94963	2.41221	0.289864	1.86308	0.772355	1640.85	26.99	1623.92	19.5471	1602.03	28.583	1602.03	28.583	102.423
133	106.799	112107	1.1765	10.0986	0.854445	3.92492	1.54398	0.287468	1.286	0.832912	1628.86	18.5103	1618.83	12.4947	1605.8	15.9311	1605.8	15.9311	101.436
104	124.403	208940	3.39013	10.0811	1.03646	3.91041	2.00628	0.285911	1.71782	0.856221	1621.06	24.6217	1615.84	16.2242	1609.02	19.3173	1609.02	19.3173	100.749
35	179.755	208598	1.40936	10.0493	1.45217	3.89428	2.44401	0.283831	1.9658	0.804335	1610.63	28.0164	1612.5	19.7481	1614.92	27.0459	1614.92	27.0459	99.7343
100	170.243	106493	4.60069	10.0425	1.00642	4.00684	2.02574	0.29184	1.75805	0.867856	1650.72	25.6029	1635.58	16.4623	1616.17	18.74	1616.17	18.74	102.138
165	116.929	92536.4	1.09218	10.0256	1.12589	3.86019	1.9721	0.280684	1.61913	0.821015	1594.81	22.8758	1605.4	15.9056	1619.31	20.9563	1619.31	20.9563	98.487
264	141.487	57566.6	4.13692	10.0199	1.12312	4.05129	1.83631	0.294412	1.45281	0.791156	1663.54	21.3016	1644.56	14.9554	1620.37	20.9018	1620.37	20.9018	102.664
295	247.454	183720	1.31242	10.01	1.03964	3.89989	1.79804	0.28313	1.467	0.815889	1607.11	20.8672	1613.66	14.532	1622.21	19.3435	1622.21	19.3435	99.0691
20	227.101	104759	3.70397	10.0096	1.31101	3.89723	2.31568	0.282926	1.90883	0.824307	1606.08	27.1369	1613.11	18.7139	1622.27	24.3932	1622.27	24.3932	99.0022
222	98.327	77613.9	2.81489	10.0059	1.23153	3.99862	2.20391	0.290179	1.82771	0.829307	1642.43	26.5	1633.92	17.9031	1622.96	22.9121	1622.96	22.9121	101.199
142	92.9079	68589.5	1.05659	10.0029	1.1684	4.05724	2.10946	0.294344	1.75632	0.832592	1663.2	25.7472	1645.75	17.1854	1623.53	21.7359	1623.53	21.7359	102.443
97	87.5894	159525	1.37425	9.9868	1.2683	3.99667	2.49493	0.289484	2.1485	0.861149	1638.95	31.0932	1633.52	20.2658	1626.52	23.5855	1626.52	23.5855	100.764
17	128.214	52402.4	1.99738	9.97478	1.11984	4.09396	1.93211	0.296173	1.57448	0.814904	1672.31	23.1921	1653.1	15.7683	1628.76	20.8183	1628.76	20.8183	102.674
251	87.5114	99003.8	3.93393	9.9678	1.13086	3.84578	2.03031	0.278024	1.68621	0.83052	1581.4	23.6469	1602.39	16.3625	1630.06	21.0196	1630.06	21.0196	97.015
211	48.1308	167396	1.93687	9.95972	1.42885	3.91784	2.19082	0.283004	1.66074	0.758046	1606.47	23.6149	1617.37	17.7236	1631.57	26.5544	1631.57	26.5544	98.462
141	118.464	183087	3.3861	9.95301	1.55069	3.97415	2.22503	0.286878	1.59566	0.717139	1625.91	22.9308	1628.93	18.0525	1632.82	28.8144	1632.82	28.8144	99.5767
40	123.762	207319	3.81054	9.89753	0.970196	4.01893	1.71743	0.288493	1.41714	0.825152	1633.99	20.4544	1638.03	13.9649	1643.2	18.0042	1643.2	18.0042	99.4396
122	109.379	92356	1.14393	9.8899	1.34078	3.9764	2.04504	0.285221	1.54418	0.755087	1617.6	22.0914	1629.39	16.5938	1644.63	24.8738	1644.63	24.8738	98.3564
185	206.818	92076.5	1.337	9.87141	1.1415	4.06732	2.51529	0.291197	2.24135	0.891091	1647.51	32.5856	1647.78	20.5025	1648.1	21.1683	1648.1	21.1683	99.9638
208	111.753	96141.1	1.50107	9.8616	1.25427	4.01887	1.85603	0.287442	1.36809	0.737105	1628.73	19.6905	1638.02	15.092	1649.95	23.2543	1649.95	23.2543	98.7142
48	157.858	50030.8	2.16047	9.84278	1.1508	3.93827	2.20857	0.28114	1.88505	0.853519	1597.1	26.6668	1621.58	17.8861	1653.49	21.3261	1653.49	21.3261	96.5898
235	100.506	100441	0.991717	9.80405	0.967325	4.00035	1.50301	0.284448	1.15036	0.76537	1613.72	16.4225	1634.27	12.2099	1660.79	17.9088	1660.79	17.9088	97.1658
10	125.411	73554.8	0.991053	9.71688	1.37153	4.1609	2.45313	0.293233	2.0339	0.829104	1657.67	29.7294	1666.36	20.0848	1677.31	25.3401	1677.31	25.3401	98.8291
278	191.777	58500.8	4.5729	9.68459	1.37234	4.10364	2.36435	0.288237	1.92531	0.81431	1632.71	27.77	1655.03	19.3056	1683.45	25.3336	1683.45	25.3336	96.9858
62	217.437	130802	3.33577	9.6678	1.06956	4.21033	1.82678	0.295218	1.48093	0.81068	1667.55	21.7598	1676.04	14.9899	1686.66	19.7367	1686.66	19.7367	98.8672
243	174.156	550308	2.12478	9.64477	1.14889	4.16097	1.92962	0.291062	1.55031	0.803431	1646.83	22.5308	1666.37	15.7979	1691.06	21.1891	1691.06	21.1891	97.3848
215	35.208	56044.9	2.28106	9.64033	1.57945	4.12124	2.57911	0.28815	2.0389	0.790546	1632.28	29.4015	1658.52	21.0773	1691.91	29.1267	1691.91	29.1267	96.4756
309	131.169	231320	2.72505	9.46299	1.26644	4.11643	2.56734	0.282519	2.23324	0.869865	1604.04	31.7133	1657.57	20.9763	1726.07	23.2528	1726.07	23.2528	92.9301
19	107.703	85449.7	1.49567	9.38324	1.0467	4.61047	1.70734	0.313759	1.34886	0.790035	1759.18	20.7667	1751.16	14.247	1741.6	19.1818	1741.6	19.1818	101.01
234	92.5284	170844	2.3876	9.35176	1.37633	4.54888	2.19722	0.308529	1.71274	0.779504	1733.46	26.033	1739.96	18.2915	1747.75	25.2042	1747.75	25.2042	99.1826
78	134.036	78576.3	1.95034	9.30886	1.41517	4.70257	2.42209	0.317491	1.96565	0.811553	1777.46	30.5359	1767.7	20.2835	1756.16	25.8867	1756.16	25.8867	101.213
239	89.0964	172292	1.07297	9.18454	1.60986	4.64422	2.29968	0.309364	1.64222	0.714108	1737.57	25.0127	1757.25	19.2158	1780.72	29.3612	1780.72	29.3612	97.5771
107	312.822	54618.1	11.2981	9.1757	1.32707	4.74879	2.17112	0.316025	1.71833	0.791449	1770.29	26.6002	1775.89	18.2124	1782.47	24.1974	1782.47	24.1974	99.3162
202	88.4368	310727	1.19346	9.11854	1.52502	4.78043	2.37906	0.316148	1.82599	0.767526	1770.89	28.2752	1781.47	19.9802	1793.86	27.7667	1793.86	27.7667	98.7195
145	91.8941	96295.1	1.75859	9.11331	1.2673	4.89008	2.03169	0.323214	1.58799	0.781609	1805.41	25.005	1800.55	17.1286	1794.91	23.0703	1794.91	23.0703	100.585
293	21.0328	43316.3	0.85398	9.1023	1.93697	4.89958	2.60163	0.323451	1.73685	0.667601	1806.56	27.3643	1802.18	21.9422	1797.11	35.2554	1797.11	35.2554	100.526
15	180.618	58644.6	1.91516	9.07545	0.929086	4.77057	1.60496	0.314005	1.30871	0.815411	1760.39	20.1605	1779.73	13.4733	1802.48	16.8981	1802.48	16.8981	97.6646
89	192.149	108170	0.864353	9.05754	0.953191	4.8413	1.74411	0.318033	1.46059	0.837445	1780.11	22.7193	1792.1	14.6786	1806.07	17.329	1806.07	17.329	98.5626
14	232.336	174891	1.3289	9.03941	1.26307	4.78202	1.89032	0.313509	1.4064	0.744003	1757.95	21.6395	1781.75	15.8757	1809.72	22.9533	1809.72	22.9533	97.1396
106	85.4374	65000.8	2.92235	8.87224	1.38167	4.92664	2.14115	0.317017	1.63571	0.763936	1775.15	25.3815	1806.83	18.0745	1843.57	25.0056	1843.57	25.0056	96.2886
298	137.963	211551	3.00924	8.83964	1.21665	5.09483	1.9009	0.326635	1.46054	0.768341	1822.05	23.1816	1835.24	16.1359	1850.23	22.0008	1850.23	22.0008	98.4772
308	42.3567	246518	1.50893	8.64772	1.50148	5.32855	2.24212	0.334202	1.66514	0.74266	1858.72	26.888	1873.45	19.1711	1889.82	27.0232	1889.82	27.0232	98.3541
277	112.957	156231	1.79923	8.61982	1.29923	5.44415	2.11976	0.340351	1.67492	0.790149	1888.36	27.4173	1891.83	18.1856	1895.63	23.3663	1895.63	23.3663	99.6162
13	113.65	174154	0.903601	8.58199	0.80113	5.32984	1.42408	0.331742	1.17737	0.826757	1846.82	18.9066	1873.66	12.1761	1903.54	14.3934	1903.54	14.3934	97.0204
266	60.9446	52971.4	1.06321	8.57301	1.51359	5.53357	2.7375	0.344063	2.281	0.833243	1906.18	37.6415	1905.83	23.546	1905.42	27.1884	1905.42	27.1884	100.04
38	76.9176	88351.1	0.882031	8.54948	1.28239	5.49334	2.19209	0.340624	1.77784	0.811027	1889.67	29.1194	1899.56	18.8324	1910.36	23.021	1910.36	23.021	98.9171
7	217.147	263924	1.65373	8.33357	0.842209	5.87763	1.67915	0.355248	1.45266	0.865117	1959.61	24.5469	1957.94	14.5718	1956.15	15.0376	1956.15	15.0376	100.177
152	79.9557	65016.3	0.90137	8.31374	1.12308	5.95921	2.30709	0.359322	2.01528	0.873516	1978.96	34.3414	1969.91	20.0622	1960.41	20.0435	1960.41	20.0435	100.946
183	520.626	137277	1.21459	8.23897	1.07965	5.8939	2.14446	0.352188	1.85286	0.864019	1945.04	31.11	1960.34	18.6181	1976.51	19.2319	1976.51	19.2319	98.4075
191	400.604	180001	2.57496	8.05335	1.22249	6.30759	1.78669	0.368416	1.30299	0.729274	2021.94	22.6142	2019.51	15.6604	2017	21.6727	2017	21.6727	100.245
197	154.376	68473	1.32099	7.80094	1.16829	6.56716	2.17225	0.371556	1.83132	0.843056	2036.72	31.9814	2054.95	19.1441	2073.28	20.5806	2073.28	20.5806	98.2364
207	74.355	96325.3	2.95973	7.76467	1.0766	6.6993	1.87156	0.377269	1.53091	0.817985	2063.51	27.0336	2072.53	16.5368	2081.48	18.9475	2081.48	18.9475	99.1366
229	160.31	73201.1	1.78361	7.72148	1.31975	6.64802	2.01207	0.372299	1.51879	0.754836	2040.21	26.562	2065.74	17.7608	2091.3	23.1997	2091.3	23.1997	97.557
182	146.8	123671	0.542016	6.12323	1.3062	10.4623	2.17236	0.464631	1.73579	0.799035	2459.97	35.4976	2476.59	20.136	2490.23	22.0098	2490.23	22.0098	98.7849
23	42.46	53925.2	1.14497	5.99697	1.22229	11.1487	2.01502	0.484903	1.60197	0.795015	2548.58	33.7236	2535.64	18.7782	2525.28	20.524	2525.28	20.524	100.923
138	77.998	188337	1.41654	5.99442	1.12967	10.9695	1.95693	0.476907	1.59794	0.816554	2513.78	33.2631	2520.55	18.2122	2525.99	18.9672	2525.99	18.9672	99.5165
98	359.06	2.26147e+07	1.89954	5.69016	1.04254	11.0078	2.01548	0.454278	1.72489	0.855825	2414.24	34.7344	2523.79	18.7626	2613.08	17.3558	2613.08	17.3558	92.3908
174	104.002	107378	2.52274	5.63634	1.1855	11.9333	2.22901	0.487815	1.88761	0.846839	2561.22	39.8972	2599.18	20.8859	2628.89	19.7061	2628.89	19.7061	97.4258
249	759.082	301551	3.65721	5.44716	0.914473	12.0391	1.83922	0.475624	1.59577	0.867632	2508.18	33.1574	2607.46	17.2446	2685.49	15.1186	2685.49	15.1186	93.3974
287	159.29	78169.8	1.69919	5.41221	1.27192	12.293	2.24685	0.482537	1.85217	0.824344	2538.31	38.8625	2627.04	21.1009	2696.12	21.0088	2696.12	21.0088	94.1467
276	18.7195	33919.2	0.31695	5.40668	1.21128	13.2386	2.16803	0.519126	1.7981	0.829369	2695.47	39.6111	2696.82	20.4706	2697.81	20.004	2697.81	20.004	99.9135
70	427.207	574028	9.42881	5.34428	1.25334	12.3506	2.04632	0.478713	1.61758	0.790482	2521.66	33.7581	2631.42	19.2239	2716.96	20.6614	2716.96	20.6614	92.8115
45	93.5581	128898	1.77355	5.30295	1.11329	13.226	2.09421	0.508681	1.77378	0.846992	2651	38.5541	2695.92	19.772	2729.76	18.3305	2729.76	18.3305	97.1148
65	75.61	142806	0.722226	5.28925	1.37263	13.5854	2.57621	0.521151	2.18008	0.846234	2704.06	48.1493	2721.24	24.3696	2734.02	22.5929	2734.02	22.5929	98.9044
81	350.628	1.2282e+06	7.25023	5.2892	0.738341	12.7421	1.84716	0.488799	1.69317	0.916638	2565.48	35.8359	2660.78	17.3926	2734.03	12.1507	2734.03	12.1507	93.835
269	58.7128	117014	0.71638	5.28831	1.13265	13.4673	1.91485	0.516529	1.54395	0.806299	2684.44	33.8999	2712.99	18.1011	2734.31	18.6415	2734.31	18.6415	98.1763
312	200.541	113613	2.37864	5.2339	0.834575	13.5354	1.83199	0.513801	1.63085	0.890207	2672.83	35.6832	2717.76	17.3237	2751.31	13.7166	2751.31	13.7166	97.1477
84	59.8253	63413.6	1.78577	5.23049	1.28058	13.9194	1.95518	0.528033	1.47745	0.755658	2733.16	32.9126	2744.24	18.524	2752.38	21.0417	2752.38	21.0417	99.3016
230	76.4517	53244.9	0.934345	5.22396	0.850751	14.1186	1.53811	0.534921	1.2814	0.833104	2762.15	28.7879	2757.7	14.5857	2754.44	13.9784	2754.44	13.9784	100.28
125	230.535	9.06041e+06	1.81669	5.21743	1.12443	13.9825	1.80971	0.529102	1.418	0.783549	2737.67	31.6301	2748.52	17.1507	2756.49	18.4718	2756.49	18.4718	99.3172
284	28.3431	47581.5	1.77774	5.21368	1.28817	13.9388	1.94587	0.527069	1.45844	0.749504	2729.09	32.4503	2745.56	18.4375	2757.67	21.1595	2757.67	21.1595	98.9636
282	169.86	172599	2.7048	5.20337	0.963555	13.9081	1.59567	0.524869	1.2719	0.797093	2719.8	28.2223	2743.47	15.1165	2760.92	15.8223	2760.92	15.8223	98.5105
273	71.9193	68891	1.77918	5.14958	1.09315	13.627	1.91155	0.508943	1.56813	0.820347	2652.12	34.0958	2724.14	18.0845	2777.97	17.919	2777.97	17.919	95.4694
231	828.038	1.24798e+06	1.14058	5.13988	1.32609	14.3852	2.10367	0.536251	1.63306	0.776293	2767.73	36.7478	2775.45	19.9745	2781.06	21.7324	2781.06	21.7324	99.5208
123	110.041	237903	1.48838	5.12106	1.06599	14.4405	1.98567	0.53634	1.67528	0.843683	2768.11	37.7019	2779.1	18.8586	2787.07	17.4593	2787.07	17.4593	99.3198
219	42.4233	190731	1.01516	5.07072	0.941016	15.0685	1.983	0.554164	1.7455	0.880233	2842.47	40.1223	2819.58	18.8841	2803.24	15.3929	2803.24	15.3929	101.399
303	33.1733	481543	0.989403	5.00203	1.28624	15.0167	2.13049	0.544779	1.6984	0.797189	2803.42	38.6116	2816.3	20.2847	2825.52	20.9943	2825.52	20.9943	99.2178
126	66.9806	593760	2.63567	4.99673	1.0551	15.094	2.23374	0.547003	1.96884	0.881412	2812.7	44.8782	2821.19	21.2748	2827.25	17.218	2827.25	17.218	99.4851
257	199.025	86206	0.808409	4.93698	0.950319	14.9454	1.73975	0.535139	1.45726	0.837629	2763.07	32.7475	2811.77	16.5587	2846.87	15.4807	2846.87	15.4807	97.0566
247	111.253	171679	1.96281	4.81053	1.14244	15.8611	1.96879	0.553382	1.60343	0.814423	2839.22	36.8231	2868.47	18.8073	2889.05	18.5414	2889.05	18.5414	98.2753
271	469.681	159141	0.589854	4.5499	1.05049	17.035	1.70214	0.562138	1.3393	0.786836	2875.46	31.0687	2936.81	16.3263	2979.11	16.9155	2979.11	16.9155	96.5207
300	101.217	250446	1.15252	4.53007	1.04428	17.6829	1.85904	0.580974	1.53801	0.827318	2952.72	36.4347	2972.64	17.8678	2986.14	16.8055	2986.14	16.8055	98.8809
223	117.685	117943	6.21297	4.52753	1.27584	17.4021	2.18478	0.571429	1.77355	0.811777	2913.68	41.5754	2957.27	20.9814	2987.04	20.5316	2987.04	20.5316	97.5441
299	341.706	95820.8	3.0566	4.22329	0.841501	19.234	1.75358	0.58914	1.53848	0.877337	2985.93	36.7681	3053.63	16.9272	3098.45	13.414	3098.45	13.414	96.3685
232	86.5798	77222.7	2.80132	4.12497	1.33726	21.0432	2.29989	0.629553	1.87116	0.813585	3147.82	46.6015	3140.59	22.2969	3135.96	21.2541	3135.96	21.2541	100.378
177	45.2518	75500.9	2.16318	3.68352	1.11742	25.056	2.09089	0.669381	1.76726	0.845216	3303.48	45.6818	3310.4	20.4185	3314.59	17.5147	3314.59	17.5147	99.665
179	228.124	69391.8	2.05824	2.97088	0.488707	31.0238	1.89602	0.668466	1.83196	0.966211	3299.95	47.3155	3519.81	18.6528	3647.41	7.47035	3647.41	7.47035	90.4739
Rejected Analyses: >10% discordant; >5% rev discordant; >10% 2s err; grains <500 Ma-evaluated by 1s err concordance; 1200 Ma cutoff
60	4768.4	35438.4	4.74337	15.6705	1.67702	0.423848	2.59587	0.0481716	1.98145	0.763309	303.287	5.87031	358.799	7.84635	735.498	35.5084	303.287	5.87031	NA
226	990.999	89732.9	7.71977	18.8765	1.23793	0.397845	1.85203	0.0544671	1.37751	0.743784	341.889	4.58685	340.084	5.35226	327.785	28.1138	341.889	4.58685	NA
188	1729.61	62722.2	1.90631	16.6451	1.68688	0.461247	2.67157	0.0556825	2.07165	0.775443	349.315	7.04402	385.125	8.56283	606.359	36.4856	349.315	7.04402	NA
71	253.724	101204	0.974181	17.5013	1.68818	0.668064	2.56172	0.0847982	1.92676	0.752138	524.699	9.70923	519.535	10.4179	496.905	37.1942	524.699	9.70923	105.593
192	772.515	156913	15.175	15.1491	1.37609	0.807888	2.2645	0.0887638	1.79842	0.794182	548.222	9.45175	601.268	10.2753	806.691	28.8234	548.222	9.45175	67.9594
33	288.404	219824	36.7986	15.9885	1.58731	0.771831	2.64726	0.0895012	2.11859	0.800296	552.586	11.2193	580.813	11.7097	692.776	33.8227	552.586	11.2193	79.7641
210	314.812	64854.1	3.7816	15.8636	1.44972	0.782518	2.14313	0.0900315	1.57839	0.736489	555.723	8.40407	586.919	9.55328	709.515	30.8257	555.723	8.40407	78.3244
200	2289.84	91536.3	139.315	13.9736	1.11163	1.08112	1.86216	0.109568	1.49397	0.802276	670.238	9.5102	744.183	9.82288	973.551	22.6709	670.238	9.5102	68.8447
233	85.3094	47297.6	1.47434	13.4859	1.54567	1.41947	2.13142	0.138837	1.4676	0.688555	838.082	11.5337	897.138	12.6978	1045.61	31.1945	1045.61	31.1945	80.1527
181	55.0273	36340.2	1.43652	13.4656	1.6849	1.91488	2.88788	0.18701	2.34541	0.812158	1105.16	23.8205	1086.29	19.2656	1048.65	33.9823	1048.65	33.9823	105.388
31	856.833	88239.4	6.51142	13.3313	1.17663	1.53014	2.49617	0.147946	2.20146	0.881934	889.439	18.2899	942.555	15.3294	1068.82	23.631	1068.82	23.631	83.2165
4	272.031	78047.7	2.10352	12.9995	1.25486	1.61044	2.3469	0.151834	1.98325	0.845051	911.238	16.853	974.281	14.7023	1119.3	25.0128	1119.3	25.0128	81.4116
11	280.632	86914.2	67.6291	12.7102	1.42711	1.88166	2.18452	0.173458	1.65393	0.757114	1031.13	15.7602	1074.65	14.4849	1164	28.2817	1164	28.2817	88.5856
87	279.742	48700.2	2.9858	12.0498	2.24582	1.23489	3.50635	0.107922	2.69273	0.767958	660.666	16.9087	816.563	19.6748	1268.95	43.8421	1268.95	43.8421	52.0639
302	732.008	144334	14.8946	11.8087	1.4268	2.24155	2.65379	0.191978	2.23759	0.84317	1132.08	23.2318	1194.14	18.6355	1308.27	27.6968	1308.27	27.6968	86.5323
160	47.2713	158835	2.17579	11.7656	1.41168	2.81755	2.38373	0.240427	1.92076	0.80578	1388.92	23.9997	1360.22	17.8657	1315.38	27.3753	1315.38	27.3753	105.591
310	30.9195	151217	2.55241	11.395	4.08678	2.01095	5.02901	0.166194	2.93074	0.582766	991.109	26.9242	1119.21	34.1173	1377.16	78.6014	1377.16	78.6014	71.9674
213	266.367	50749.1	1.4677	11.3886	1.31252	2.4726	2.36965	0.204232	1.97295	0.832592	1198.02	21.57	1264.05	17.1338	1378.24	25.2307	1378.24	25.2307	86.9234
148	1089.42	171022	3.12495	11.2396	0.933277	2.42206	1.79367	0.19744	1.53174	0.853973	1161.55	16.2812	1249.17	12.8912	1403.52	17.8775	1403.52	17.8775	82.76
301	514.623	42381.7	4.30141	11.2277	6.36951	2.29508	10.0873	0.186891	7.82199	0.775428	1104.51	79.4027	1210.77	71.4585	1405.54	122.101	1405.54	122.101	78.5827
288	685.441	230738	2.97049	10.9045	1.17147	2.84207	1.87905	0.22477	1.46919	0.781876	1307.03	17.3812	1366.72	14.1145	1461.27	22.2657	1461.27	22.2657	89.4449
259	157.962	54463.2	2.12688	10.7979	1.46176	2.26368	2.1249	0.177278	1.54223	0.725789	1052.08	14.9707	1201.05	14.9661	1479.92	27.7142	1479.92	27.7142	71.0906
108	876.03	25140	2.9103	10.71	5.31436	2.26885	5.85968	0.176235	2.46849	0.421267	1046.37	23.8423	1202.66	41.3194	1495.41	100.611	1495.41	100.611	69.9724
127	904.106	453552	3.51349	10.5944	0.829904	2.89221	1.8081	0.222231	1.60639	0.888441	1293.65	18.8288	1379.88	13.6431	1515.9	15.6572	1515.9	15.6572	85.3389
291	184.053	196055	1.76027	10.3533	1.02776	2.79387	1.734	0.20979	1.3966	0.805418	1227.7	15.6122	1353.9	12.9666	1559.21	19.2798	1559.21	19.2798	78.7386
1	88.8238	186531	2.45876	10.124	1.18198	4.29606	2.1542	0.315445	1.80098	0.83603	1767.44	27.8407	1692.61	17.7451	1601.1	22.0523	1601.1	22.0523	110.389
281	246.283	98240.1	2.11188	10.045	1.25393	3.0146	2.19002	0.219622	1.7955	0.819857	1279.88	20.8428	1411.32	16.6995	1615.72	23.3508	1615.72	23.3508	79.2143
61	242.864	90499.5	1.71696	9.7163	9.82411	3.6854	10.8999	0.259707	4.72177	0.433193	1488.34	62.7554	1568.21	87.2687	1677.42	181.942	1677.42	181.942	88.7283
137	71.1439	103016	0.933239	9.60178	1.63601	3.18933	2.95322	0.222101	2.45865	0.832533	1292.96	28.8045	1454.58	22.8325	1699.29	30.1434	1699.29	30.1434	76.0885
47	757.345	148789	5.08808	9.57818	1.63623	3.79093	2.41061	0.263347	1.77024	0.734356	1506.94	23.788	1590.83	19.3702	1703.82	30.1303	1703.82	30.1303	88.4447
196	53.6645	43966.8	0.498084	9.29225	4.55422	3.69466	6.44956	0.248997	4.56684	0.708085	1433.3	58.6919	1570.21	51.5827	1759.43	83.3176	1759.43	83.3176	81.4638
120	296.802	92895.7	7.33269	9.26402	1.3461	4.09195	2.43437	0.274934	2.02833	0.833208	1565.8	28.1969	1652.7	19.8663	1764.99	24.5961	1764.99	24.5961	88.7141
172	569.242	63910.3	9.2495	6.00213	2.43393	8.5435	3.48197	0.371911	2.49	0.715113	2038.39	43.5149	2290.56	31.661	2523.83	40.8797	2523.83	40.8797	80.7655
88	42.6385	214581	0.467766	5.91677	1.37809	9.1342	2.66731	0.391971	2.28373	0.856191	2131.96	41.4565	2351.54	24.4157	2547.86	23.0892	2547.86	23.0892	83.6766
56	779.935	540665	9.48768	5.54251	1.60045	9.55934	3.14883	0.384267	2.71177	0.8612	2096.19	48.5281	2393.27	28.9526	2656.75	26.5351	2656.75	26.5351	78.9002
80	1025.82	100532	6.43463	5.47897	1.16571	11.1291	2.18187	0.442239	1.84436	0.845312	2360.65	36.4576	2534	20.3305	2675.86	19.2908	2675.86	19.2908	88.2206
34	98.8392	120269	2.05941	4.93024	1.01543	11.6399	2.3639	0.416213	2.13469	0.903039	2243.26	40.4433	2575.88	22.1072	2849.09	16.5384	2849.09	16.5384	78.736
J1330, Clarence River Group, Buckland Hills Formation						(n=80/100)
73	112.69	2026.44	2.13692	14.7776	23.6434	0.664039	24.104	0.07117	4.68972	0.194562	443.201	20.0866	517.082	97.9704	858.438	497.417	443.201	20.0866	NA
62	226.098	4683.67	2.81957	18.0389	0.715539	0.497979	1.51464	0.0651508	1.33497	0.881377	406.875	5.2638	410.333	5.11269	429.815	15.9498	406.875	5.2638	NA
83	507.791	10411.3	1.63767	17.7983	0.574709	0.517475	1.04882	0.0667984	0.877348	0.836507	416.838	3.54139	423.463	3.63163	459.682	12.7438	416.838	3.54139	NA
82	343.335	7933.22	2.1284	17.8007	1.02489	0.520707	1.40411	0.0672246	0.959756	0.683534	419.413	3.89719	425.623	4.88182	459.388	22.7493	419.413	3.89719	NA
91	612.217	13074.6	7.27218	17.8969	0.570255	0.519727	1.9438	0.0674609	1.85827	0.955999	420.84	7.57056	424.969	6.74992	447.409	12.6761	420.84	7.57056	NA
79	128.598	2869.44	4.40664	18.1665	1.0922	0.528412	1.905	0.0696213	1.5608	0.81932	433.874	6.54906	430.755	6.68749	414.087	24.4122	433.874	6.54906	NA
37	116.036	2551.52	1.12958	18.3309	1.16942	0.529472	2.20711	0.0703925	1.87184	0.848095	438.52	7.93542	431.46	7.75825	393.912	26.2304	438.52	7.93542	NA
88	758.101	14984.8	3.82705	17.8969	1.01905	0.552649	1.47273	0.0717343	1.06324	0.721951	446.596	4.58765	446.731	5.32273	447.404	22.6454	446.596	4.58765	NA
69	198.447	4304.17	5.37831	18.0997	0.594989	0.553774	2.96487	0.0726946	2.90456	0.979657	452.369	12.6889	447.466	10.7299	422.315	13.2801	452.369	12.6889	NA
40	332.812	6692.07	1.69306	17.9512	1.09278	0.565999	1.74739	0.0736899	1.36352	0.78032	458.348	6.03267	455.424	6.41282	440.67	24.3236	458.348	6.03267	NA
15	82.9048	2025.25	1.2642	17.4043	0.966842	0.631947	2.92856	0.0797692	2.76436	0.943931	494.745	13.1649	497.308	11.5153	509.125	21.279	494.745	13.1649	NA
11	968.987	19924.6	105.835	17.5001	0.965794	0.645641	1.55476	0.0819465	1.21841	0.783665	507.731	5.94892	505.793	6.19378	497.025	21.2639	507.731	5.94892	102.154
25	554.731	18259.3	2.40415	16.3274	0.718205	0.920806	3.47291	0.10904	3.39784	0.978383	667.168	21.5357	662.786	16.9063	647.93	15.406	667.168	21.5357	102.969
47	638.091	32673	9.09735	13.9602	0.663315	1.52631	3.0354	0.154537	2.96203	0.975831	926.347	25.5585	941.017	18.623	975.532	13.504	926.347	25.5585	94.9582
49	270.255	12706.7	4.15174	14.1081	0.640958	1.58464	2.57583	0.162142	2.49481	0.968546	968.67	22.4385	964.192	16.0366	953.996	13.0984	968.67	22.4385	101.538
67	473.81	23003.1	11.7987	13.9583	0.676643	1.60356	2.03625	0.162337	1.92054	0.943174	969.753	17.2913	971.6	12.7351	975.761	13.774	969.753	17.2913	99.3843
72	304.287	15997.8	2.43406	14.0247	0.596226	1.60594	1.84465	0.163351	1.74564	0.946324	975.37	15.801	972.526	11.5432	966.128	12.1696	975.37	15.801	100.957
94	448.827	22236	5.45183	13.7792	0.99479	1.63923	3.13925	0.163819	2.97746	0.948463	977.963	27.0175	985.418	19.8004	1002.04	20.1771	977.963	27.0175	97.5972
21	1078.24	55955.3	18.9263	14.1517	1.17789	1.60176	2.80421	0.164401	2.54483	0.907504	981.188	23.1623	970.899	17.5313	947.664	24.0963	981.188	23.1623	103.538
36	326.441	15454.6	1.4771	13.9338	0.628958	1.6277	1.11326	0.164491	0.918558	0.82511	981.689	8.36435	980.972	7.00213	979.349	12.8163	981.689	8.36435	100.239
29	584.589	29127	15.9912	14.1066	0.90301	1.61675	3.43385	0.165412	3.31299	0.964803	986.78	30.3129	976.732	21.5455	954.222	18.4717	986.78	30.3129	103.412
22	162.725	8678.45	3.48253	14.1074	0.643158	1.61853	2.85851	0.165603	2.78521	0.974359	987.841	25.5092	977.423	17.9423	954.084	13.1468	987.841	25.5092	103.538
78	222.099	12120.8	1.75356	13.4677	0.589124	1.77887	2.49621	0.173755	2.4257	0.971751	1032.76	23.1481	1037.77	16.2265	1048.34	11.8963	1032.76	23.1481	98.5145
4	291.425	18177	2.90222	13.1581	0.524996	1.86427	1.03002	0.177909	0.88618	0.860354	1055.54	8.62834	1068.5	6.80731	1095.06	10.5099	1055.54	8.62834	96.3911
98	149.672	8291.37	3.17181	13.0868	0.689437	1.89136	1.59999	0.179517	1.44382	0.902399	1064.34	14.1656	1078.06	10.6276	1105.91	13.7992	1064.34	14.1656	96.2409
55	118.052	7538.77	1.96436	13.2612	0.545474	1.99121	2.48065	0.191512	2.41994	0.975524	1129.56	25.0739	1112.53	16.7689	1079.38	10.9277	1129.56	25.0739	104.649
64	1195.79	71985.2	5.51917	12.9071	1.49757	2.08893	2.49714	0.195547	1.99824	0.800214	1151.36	21.0695	1145.17	17.1486	1133.46	29.8121	1151.36	21.0695	101.579
33	325.507	21438.4	2.2752	12.3125	0.778677	2.43034	2.59954	0.217025	2.48018	0.954083	1266.14	28.5111	1251.62	18.7028	1226.72	15.3112	1226.72	15.3112	103.213
99	160.649	11016.6	3.12266	12.3119	0.55045	2.33876	1.94889	0.208838	1.86954	0.959284	1222.62	20.8208	1224.15	13.8626	1226.81	10.8096	1226.81	10.8096	99.6586
3	181.093	10490.3	2.30138	12.063	0.689036	2.52257	2.06504	0.220697	1.9467	0.942691	1285.56	22.6886	1278.56	15.0167	1266.84	13.454	1266.84	13.454	101.477
18	48.9079	3316.72	2.61656	11.8384	0.928345	2.59632	1.47466	0.222921	1.14577	0.776975	1297.29	13.4639	1299.6	10.8103	1303.4	18.0338	1303.4	18.0338	99.5318
38	237.695	15592.6	2.78243	11.3127	0.897786	2.9268	2.35475	0.240137	2.17688	0.924465	1387.41	27.1734	1388.87	17.8227	1391.09	17.2267	1391.09	17.2267	99.7351
23	83.251	6646.57	6.7035	11.2811	0.801462	2.991	4.8036	0.244719	4.73627	0.985983	1411.18	60.0294	1405.33	36.5695	1396.45	15.3672	1396.45	15.3672	101.055
76	277.599	26766.2	2.93444	11.0993	0.948562	3.05354	1.73514	0.24581	1.45291	0.837344	1416.83	18.4802	1421.12	13.2727	1427.53	18.1111	1427.53	18.1111	99.2504
96	138.139	10864.1	2.2194	10.7844	0.80681	3.3	1.48586	0.258112	1.24774	0.839739	1480.18	16.5018	1481.05	11.5791	1482.29	15.2913	1482.29	15.2913	99.8573
68	248.316	14096.2	1.45679	10.4082	2.93397	3.62669	4.63202	0.27377	3.58433	0.773815	1559.91	49.6626	1555.41	36.8834	1549.28	55.1227	1549.28	55.1227	100.687
65	255.301	22717.3	2.51177	10.3676	0.548339	3.67387	2.38118	0.27625	2.31718	0.973124	1572.45	32.3332	1565.71	19.0072	1556.62	10.2905	1556.62	10.2905	101.017
19	73.9498	6132.23	0.853108	10.0893	1.15702	3.55075	2.27642	0.259824	1.96046	0.861201	1488.94	26.0644	1538.6	18.0371	1607.52	21.5688	1607.52	21.5688	92.6235
10	87.382	7193.45	5.78485	9.85337	0.603898	4.27565	6.93606	0.305553	6.90972	0.996203	1718.78	104.258	1688.69	57.1382	1651.49	11.1946	1651.49	11.1946	104.074
95	69.1514	7641.05	1.66521	9.83462	0.787644	4.07816	1.71215	0.290885	1.52022	0.887903	1645.95	22.0831	1649.95	13.9623	1655.02	14.5926	1655.02	14.5926	99.4516
35	183.285	16978.5	3.05037	9.64943	0.737625	4.33845	1.75443	0.303623	1.59183	0.907322	1709.25	23.9001	1700.7	14.4782	1690.17	13.6047	1690.17	13.6047	101.129
87	81.2512	8876.85	1.54136	9.33483	0.505535	4.75888	2.08534	0.322189	2.02314	0.970171	1800.41	31.7807	1777.68	17.4991	1751.07	9.25239	1751.07	9.25239	102.818
50	78.1753	8122.69	4.24262	9.29963	0.667561	4.5862	1.52886	0.309326	1.37542	0.899636	1737.39	20.9471	1746.76	12.7455	1757.98	12.2097	1757.98	12.2097	98.8289
5	309.699	12825.4	2.17823	9.15163	0.53501	4.70897	3.05033	0.312552	3.00305	0.984498	1753.25	46.0992	1768.84	25.5527	1787.26	9.74809	1787.26	9.74809	98.0971
97	81.2049	7159.93	1.72029	8.9113	0.790986	4.85275	1.21953	0.313638	0.928223	0.761131	1758.58	14.2864	1794.09	10.2675	1835.61	14.3298	1835.61	14.3298	95.8036
43	41.899	4543.77	1.28201	8.88546	0.768675	5.14021	2.55992	0.331253	2.44179	0.953853	1844.45	39.1679	1842.78	21.7631	1840.87	13.9147	1840.87	13.9147	100.194
77	52.4897	5721.52	2.34966	8.86706	0.520674	5.25602	2.70728	0.338015	2.65674	0.981331	1877.11	43.2662	1861.75	23.0992	1844.62	9.42036	1844.62	9.42036	101.761
24	133.079	12316.7	0.905841	8.85064	0.979885	5.19295	1.47721	0.33334	1.10543	0.748322	1854.55	17.8154	1851.46	12.578	1847.98	17.7236	1847.98	17.7236	100.356
20	197.345	19601.1	1.59472	8.84652	0.701515	4.95499	1.79426	0.317917	1.65144	0.9204	1779.55	25.6808	1811.68	15.1604	1848.82	12.6866	1848.82	12.6866	96.2533
60	87.5363	8748.95	1.45987	8.82961	0.87631	5.2405	1.60054	0.335593	1.33933	0.836799	1865.43	21.6943	1859.23	13.6482	1852.28	15.8416	1852.28	15.8416	100.71
41	81.4114	7720.5	2.22782	8.82769	0.644973	5.17725	2.70257	0.331471	2.62448	0.971105	1845.51	42.1193	1848.88	23.003	1852.67	11.6584	1852.67	11.6584	99.6132
63	220.927	23847.6	0.682279	8.74563	0.776592	5.16499	1.53615	0.327611	1.32539	0.8628	1826.79	21.0839	1846.87	13.0684	1869.54	14.0114	1869.54	14.0114	97.7137
8	273.346	27560.5	8.23696	8.72037	0.770601	5.29659	1.53136	0.334988	1.32334	0.864161	1862.52	21.4064	1868.31	13.0804	1874.75	13.8945	1874.75	13.8945	99.3472
9	82.9946	8457.65	1.26187	8.71013	0.591697	5.3293	0.87763	0.336662	0.648174	0.738551	1870.59	10.524	1873.57	7.5035	1876.87	10.666	1876.87	10.666	99.6653
6	188.123	19268.5	28.2556	8.64971	0.563178	5.37424	1.51406	0.337146	1.40543	0.928247	1872.92	22.8437	1880.76	12.9624	1889.41	10.1347	1889.41	10.1347	99.1275
84	112.975	12456.9	0.806033	8.62504	0.915251	5.54078	2.12157	0.346602	1.914	0.90216	1918.35	31.7582	1906.95	18.2506	1894.54	16.4618	1894.54	16.4618	101.257
32	341.906	32737.4	2.34829	8.57902	0.678661	5.44007	2.13008	0.338486	2.01907	0.947886	1879.38	32.9155	1891.19	18.272	1904.16	12.1938	1904.16	12.1938	98.6987
39	95.1251	10889.1	0.705382	8.57015	0.922204	5.66258	2.5047	0.351967	2.32875	0.929751	1943.98	39.0825	1925.68	21.6184	1906.02	16.5642	1906.02	16.5642	101.992
86	39.3454	4228.3	0.868278	8.56005	0.989081	5.39041	3.53017	0.334654	3.38877	0.959948	1860.9	54.7771	1883.33	30.2445	1908.14	17.7611	1908.14	17.7611	97.5244
93	138.304	17070.3	1.28243	8.5563	0.672874	5.53452	1.41503	0.343451	1.24481	0.879705	1903.25	20.5147	1905.97	12.1698	1908.93	12.0829	1908.93	12.0829	99.7026
13	65.3456	6751.74	1.29115	8.53859	0.653478	5.6379	2.61224	0.349142	2.52919	0.968205	1930.5	42.1939	1921.91	22.5321	1912.65	11.7294	1912.65	11.7294	100.934
14	84.1918	8460.65	0.81577	8.48796	0.624073	5.66266	2.23147	0.348596	2.14243	0.960097	1927.89	35.7001	1925.69	19.2596	1923.31	11.1854	1923.31	11.1854	100.238
100	48.8278	5213.86	1.28853	8.48387	0.540698	5.54227	2.15099	0.34102	2.08192	0.96789	1891.58	34.1296	1907.18	18.5044	1924.18	9.68981	1924.18	9.68981	98.3056
44	185.349	21554.5	1.39717	8.48208	0.514808	5.75399	2.16486	0.353973	2.10276	0.971314	1953.54	35.4382	1939.52	18.7291	1924.56	9.22532	1924.56	9.22532	101.506
61	145.122	14507.9	0.809328	8.44512	0.872171	5.53168	2.06165	0.338814	1.86808	0.906109	1880.96	30.476	1905.53	17.7305	1932.38	15.6164	1932.38	15.6164	97.3395
71	72.6371	8314.52	1.18117	8.4091	0.563002	5.64036	2.75927	0.343998	2.70122	0.978962	1905.87	44.5699	1922.29	23.8023	1940.03	10.0728	1940.03	10.0728	98.2396
56	195.715	21287.5	1.3052	8.406	0.754424	5.7385	3.14812	0.349853	3.05638	0.970861	1933.9	51.0663	1937.19	27.2283	1940.69	13.4965	1940.69	13.4965	99.6502
46	59.4966	7079.57	1.59344	7.58932	0.862214	7.15882	0.964283	0.394042	0.431773	0.447766	2141.55	7.86758	2131.39	8.5913	2121.59	15.1055	2121.59	15.1055	100.941
1	137.948	16889.7	1.4771	7.22782	0.617497	7.76509	2.11406	0.407055	2.02187	0.956391	2201.44	37.7066	2204.17	19.019	2206.69	10.7185	2206.69	10.7185	99.762
28	380.714	47001.2	2.52217	6.9081	1.18947	8.25389	2.88627	0.413538	2.62977	0.911132	2231.08	49.5966	2259.27	26.1455	2284.89	20.4719	2284.89	20.4719	97.6451
81	70.8278	9779.75	1.18724	6.80916	1.11559	8.05786	1.52218	0.397935	1.03561	0.680348	2159.52	19.0038	2237.53	13.7504	2309.68	19.1496	2309.68	19.1496	93.499
27	41.6028	5412.5	1.34253	6.71998	0.97208	9.2179	1.46399	0.449261	1.09468	0.747738	2391.97	21.8756	2359.89	13.4111	2332.28	16.646	2332.28	16.646	102.559
7	159.737	21185	2.10328	6.52704	0.908551	9.4569	2.11566	0.447676	1.91064	0.903095	2384.91	38.0886	2383.37	19.4301	2382.04	15.4775	2382.04	15.4775	100.12
12	89.7343	11742.8	3.16421	6.48168	0.809288	9.78149	2.53816	0.459824	2.40568	0.947806	2438.78	48.8491	2414.41	23.3858	2393.91	13.7693	2393.91	13.7693	101.874
59	197.377	37838.3	2.13932	5.99607	0.619207	11.4483	2.46064	0.497861	2.38146	0.96782	2604.6	51.0278	2560.38	22.9818	2525.53	10.3983	2525.53	10.3983	103.131
58	157.609	23208	1.99925	5.79186	0.857006	10.7528	1.31926	0.451689	1.00299	0.760268	2402.76	20.1179	2502	12.2564	2583.55	14.3069	2583.55	14.3069	93.0022
89	129.017	22353.9	2.19395	5.69879	0.6324	12.502	1.50259	0.516728	1.36302	0.907119	2685.29	29.935	2642.88	14.1279	2610.55	10.5323	2610.55	10.5323	102.863
57	59.4801	9811.32	1.09097	5.69006	0.504375	12.2861	2.44106	0.507027	2.38839	0.978421	2643.92	51.8015	2626.51	22.9245	2613.11	8.39794	2613.11	8.39794	101.179
74	199.631	34802.9	1.43997	5.41275	0.738282	12.7087	2.03349	0.498906	1.89474	0.931765	2609.09	40.6553	2658.31	19.1438	2695.96	12.1931	2695.96	12.1931	96.7781
80	82.415	19309.4	1.55536	3.8814	0.815643	23.2561	2.69608	0.654674	2.56974	0.95314	3246.44	65.5444	3237.72	26.2528	3232.31	12.867	3232.31	12.867	100.437
Rejected Analyses: >10% discordant; >5% rev discordant; >10% 2s err; grains <500 Ma-evaluated by 1s err concordance; 1200 Ma cutoff
92	1469.95	12729.8	11.9191	17.5408	0.654484	0.347229	15.9218	0.0441739	15.9084	0.999155	278.653	43.3854	302.635	41.691	491.934	14.4536	278.653	43.3854	NA
66	341.347	8547.53	7.6971	17.731	0.509067	0.576784	9.44717	0.0741728	9.43344	0.998547	461.246	41.9918	462.393	35.1031	468.078	11.2709	461.246	41.9918	NA
51	3252.13	37794.4	20.1027	14.6345	1.63567	0.852361	4.10196	0.0904693	3.76173	0.917058	558.312	20.1185	625.944	19.1677	878.645	33.8318	558.312	20.1185	63.5424
26	1773.76	45483.5	47.2894	14.342	1.2363	1.22602	9.51757	0.127529	9.43693	0.991528	773.753	68.8092	812.527	53.275	920.289	25.4186	773.753	68.8092	84.0772
90	129.286	8586.51	4.13277	13.1864	0.671791	2.0456	1.95993	0.195634	1.84121	0.939422	1151.82	19.4208	1130.83	13.3673	1090.72	13.4643	1151.82	19.4208	105.602
2	563.166	32558.3	2.27963	12.6823	0.882039	2.37183	3.00249	0.218162	2.87	0.955876	1272.16	33.1344	1234.15	21.4483	1168.36	17.4852	1168.36	17.4852	108.884
70	914.127	59672.6	3.61498	12.5443	1.23319	2.35957	2.96014	0.214674	2.69103	0.909091	1253.67	30.6592	1230.45	21.1132	1190.02	24.3457	1190.02	24.3457	105.349
48	1623.36	10264	1.52157	11.8443	4.27792	1.50565	6.34784	0.129339	4.68982	0.738806	784.094	34.6245	932.677	38.7498	1302.44	83.1258	1302.44	83.1258	60.2021
54	228.617	15043.8	2.79911	11.8162	4.68236	2.39667	8.54963	0.205393	7.15343	0.836695	1204.23	78.5799	1241.61	61.3281	1307.04	90.9443	1307.04	90.9443	92.1337
30	1361.71	29899.3	2.56062	11.6211	0.98588	2.32861	3.41382	0.196265	3.26836	0.957392	1155.23	34.5675	1221.05	24.2542	1339.29	19.0537	1339.29	19.0537	86.2563
52	176.004	15968	2.42677	10.8151	0.841572	3.47093	3.14135	0.272256	3.02652	0.963446	1552.24	41.7513	1520.64	24.7674	1476.9	15.9617	1476.9	15.9617	105.102
16	257.349	18341.7	3.72282	9.89484	0.677072	3.40067	5.25585	0.244047	5.21206	0.991668	1407.7	65.9141	1504.55	41.2627	1643.71	12.5636	1643.71	12.5636	85.6419
45	635.087	25654.5	1.38627	9.22297	0.659019	3.26286	3.74131	0.218257	3.68281	0.984364	1272.66	42.5337	1472.25	29.085	1773.11	12.029	1773.11	12.029	71.7757
42	745.158	41999.5	6.28128	8.74008	1.32142	4.03365	3.02871	0.255689	2.72524	0.899802	1467.75	35.7732	1641.01	24.6484	1870.68	23.8349	1870.68	23.8349	78.4607
17	767.782	7979.36	3.23974	7.93232	7.30915	3.17344	10.9681	0.18257	8.1778	0.745596	1081	81.3918	1450.72	84.8807	2043.81	129.368	2043.81	129.368	52.8915
31	802.286	19464.9	2.02099	7.52124	1.99417	4.41165	6.39206	0.240652	6.07303	0.95009	1390.09	75.9423	1714.53	52.9585	2137.37	34.879	2137.37	34.879	65.0374
85	468.765	7296.12	1.68458	6.28225	2.46277	5.8665	6.49474	0.267296	6.0097	0.925317	1527.06	81.7163	1956.29	56.4003	2446.94	41.6841	2446.94	41.6841	62.4071
53	51.08	8215.93	1.7168	5.31238	0.839445	14.5225	2.1387	0.559539	1.96707	0.919751	2864.72	45.4966	2784.48	20.3197	2726.83	13.8242	2726.83	13.8242	105.057
34	1527.82	1479.64	0.864736	4.97822	14.5692	2.05585	19.355	0.0742272	12.7419	0.658325	461.573	56.7584	1134.24	132.97	2833.3	239.064	2833.3	239.064	16.291
75	300.502	11866	1.59858	4.793	6.73524	11.4203	8.46479	0.396995	5.1273	0.605721	2155.19	93.9352	2558.09	79.1902	2894.98	109.396	2894.98	109.396	74.4457
J1341, Clarence River Group, Buckland Hills Formation						(n=94/100)
2	474.963	72653.6	1.15108	18.2929	2.24941	0.491998	2.45413	0.0652748	0.981285	0.39985	407.625	3.87612	406.271	8.21736	398.562	50.3969	407.625	3.87612	102.274
18	313.719	36542.8	1.30555	18.2341	1.69787	0.495487	2.39116	0.0655261	1.68372	0.704142	409.145	6.6748	408.643	8.04447	405.782	38.0066	409.145	6.6748	100.829
19	247.909	13330.7	1.2566	19.1053	4.73316	0.479632	5.09348	0.06646	1.88169	0.369431	414.793	7.55931	397.821	16.7664	300.385	107.97	414.793	7.55931	138.087
14	45.1594	7781.45	3.57839	19.1148	38.81	0.479992	39.0259	0.0665429	4.09947	0.105045	415.294	16.4881	398.067	129.209	299.204	916.955	415.294	16.4881	138.8
26	153.213	26277.9	0.996716	17.245	8.88776	0.532127	9.02014	0.0665545	1.53972	0.170698	415.364	6.19376	433.22	31.8204	529.32	195.085	415.364	6.19376	78.4713
33	229.217	108898	1.52278	18.4253	4.25611	0.498548	4.89968	0.0666225	2.42741	0.495422	415.775	9.77399	410.719	16.5528	382.376	95.6872	415.775	9.77399	108.735
47	202.164	26064.4	1.49651	18.0211	6.33174	0.512576	6.5578	0.0669944	1.70699	0.260299	418.022	6.90916	420.18	22.5684	432.02	141.191	418.022	6.90916	96.76
20	248.377	44074.3	1.12982	17.7231	2.80828	0.522227	3.19013	0.0671273	1.51344	0.474412	418.825	6.13713	426.638	11.1131	469.056	62.2037	418.825	6.13713	89.291
87	341.167	72633.9	1.40663	18.3439	2.76723	0.505502	3.12757	0.0672533	1.45745	0.465999	419.586	5.92047	415.42	10.6634	392.326	62.0789	419.586	5.92047	106.948
72	115.75	16052.6	1.04988	19.3398	9.67655	0.479575	10.0801	0.0672677	2.82349	0.280107	419.674	11.472	397.782	33.187	272.45	222.248	419.674	11.472	154.037
37	153.88	20387.3	1.03991	19.1053	6.57178	0.48565	6.7396	0.0672938	1.49459	0.221762	419.831	6.07479	401.942	22.3739	300.384	149.988	419.831	6.07479	139.765
69	60.4142	15968.2	0.898528	19.6572	21.578	0.472727	21.7136	0.0673956	2.42256	0.111569	420.446	9.86051	393.071	70.885	235.05	503.019	420.446	9.86051	178.875
32	518.034	74357.3	1.75354	18.1313	0.997307	0.514266	2.09356	0.0676261	1.84076	0.879246	421.838	7.5164	421.314	7.21953	418.422	22.2738	421.838	7.5164	100.816
8	117.119	12262.4	2.80014	17.8062	4.52772	0.523716	4.86563	0.0676343	1.78158	0.366157	421.887	7.27561	427.631	16.9825	458.706	100.484	421.887	7.27561	91.9733
82	287.083	29784.9	0.828934	18.7386	4.10635	0.497957	4.36357	0.0676749	1.47601	0.338258	422.132	6.03111	410.319	14.7297	344.36	92.9255	422.132	6.03111	122.585
89	118.685	38754.3	1.0845	19.159	8.31626	0.487959	9.0742	0.0678041	3.63057	0.400097	422.912	14.8613	403.519	30.2245	293.972	190.17	422.912	14.8613	143.861
46	178.539	26888.1	1.02647	18.3301	4.78936	0.510857	5.70566	0.0679147	3.10105	0.543504	423.58	12.7132	419.025	19.5914	394.008	107.461	423.58	12.7132	107.506
49	387.942	61477.1	1.56853	18.0963	2.39658	0.517962	3.03815	0.067981	1.86728	0.614613	423.981	7.66219	423.789	10.5267	422.727	53.5006	423.981	7.66219	100.297
30	81.3054	20545.4	1.93077	18.9428	8.84759	0.49542	9.22087	0.0680638	2.59704	0.281648	424.48	10.6688	408.597	31.0275	319.825	201.435	424.48	10.6688	132.723
55	288.716	35325.9	0.879513	17.9418	2.49151	0.52325	3.39631	0.0680887	2.30809	0.679587	424.63	9.48503	427.32	11.8466	441.833	55.4371	424.63	9.48503	96.1065
95	551.855	104353	2.59693	17.9808	0.918267	0.522964	1.49855	0.0681994	1.18425	0.790262	425.298	4.87405	427.129	5.22503	437.001	20.4639	425.298	4.87405	97.3222
29	67.7736	7892.12	2.57132	17.2959	9.94783	0.544176	10.0801	0.0682624	1.62758	0.161465	425.679	6.70448	441.174	36.0844	522.821	218.685	425.679	6.70448	81.4196
48	294.986	41652.6	1.29092	18.0827	2.63343	0.521599	3.52746	0.0684068	2.34692	0.66533	426.55	9.68681	426.219	12.2786	424.407	58.7833	426.55	9.68681	100.505
77	49.1347	7996.54	2.288	22.1967	30.7804	0.425414	30.9901	0.0684854	3.59894	0.116132	427.024	14.8704	359.915	94.1818	-52.8285	765.048	427.024	14.8704	NA
3	224.697	32098.6	4.06686	17.651	4.5939	0.535733	4.83096	0.0685828	1.49476	0.309412	427.612	6.18438	435.607	17.1134	478.075	101.612	427.612	6.18438	89.4444
60	110.741	28479.1	1.20272	18.6338	5.3461	0.507627	6.64023	0.0686032	3.9385	0.593127	427.735	16.2996	416.852	22.7058	357.039	120.753	427.735	16.2996	119.801
100	110.391	23562.3	2.83983	16.9426	9.08169	0.558946	9.34646	0.0686829	2.20889	0.236335	428.216	9.15152	450.84	34.0391	567.956	198.058	428.216	9.15152	75.396
61	61.1885	8733.74	3.43377	18.5549	13.903	0.512161	14.2343	0.0689231	3.05346	0.214514	429.664	12.692	419.901	48.9905	366.6	314.68	429.664	12.692	117.202
91	200.208	23461.6	2.43086	18.3757	3.46113	0.517811	3.70661	0.0690101	1.32648	0.357868	430.189	5.52012	423.688	12.8405	388.44	77.7419	430.189	5.52012	110.748
5	823.983	73375.2	1.87293	18.262	1.03255	0.521198	3.22119	0.069032	3.05121	0.947232	430.321	12.7014	425.951	11.2068	402.351	23.1264	430.321	12.7014	106.952
65	150.915	18777.6	1.65335	17.8495	3.8454	0.533444	4.26457	0.0690579	1.84376	0.432343	430.477	7.67775	434.093	15.0646	453.3	85.4124	430.477	7.67775	94.9652
90	145.867	31589.1	3.08768	19.7492	7.6642	0.482707	7.80509	0.0691402	1.47629	0.189145	430.974	6.15442	399.928	25.8065	224.252	177.403	430.974	6.15442	192.183
75	448.129	55527.7	0.994052	18.4759	1.61436	0.515995	4.72971	0.0691435	4.44567	0.939946	430.993	18.5341	422.473	16.3474	376.208	36.3029	430.993	18.5341	114.562
96	93.7552	17725.1	3.44311	19.7762	14.6683	0.482498	14.9741	0.0692049	3.0106	0.201054	431.364	12.5617	399.785	49.5239	221.065	340.895	431.364	12.5617	195.129
83	190.809	22730.7	2.44428	18.6255	3.42313	0.512393	3.79861	0.0692166	1.6467	0.4335	431.434	6.8719	420.057	13.0682	358.039	77.2649	431.434	6.8719	120.499
80	115.151	15823.2	3.47895	17.6301	4.17455	0.541691	4.86659	0.0692634	2.50136	0.513987	431.716	10.4451	439.539	17.3641	480.694	92.2863	431.716	10.4451	89.8111
36	99.1827	17522	3.18855	17.307	10.7312	0.552548	10.8167	0.0693571	1.35747	0.125498	432.281	5.67567	446.664	39.108	521.413	236.058	432.281	5.67567	82.9057
39	115.2	20726.3	2.60432	17.9387	6.30021	0.533141	7.00897	0.0693635	3.07132	0.438199	432.32	12.8425	433.892	24.7531	442.224	140.249	432.32	12.8425	97.7603
10	295.396	49804.7	3.42819	17.7109	3.0884	0.540093	3.91388	0.0693758	2.4042	0.614276	432.394	10.0546	438.486	13.9375	470.617	68.3695	432.394	10.0546	91.878
81	143.721	31645.7	2.44395	18.2043	4.57165	0.526083	4.9953	0.0694587	2.01321	0.403021	432.893	8.42889	429.207	17.4868	409.441	102.289	432.893	8.42889	105.728
41	73.8103	17805.2	2.71821	17.6781	12.4543	0.542155	13.0966	0.0695116	4.05097	0.309315	433.212	16.9727	439.845	46.7834	474.701	276.395	433.212	16.9727	91.2601
12	79.2853	11040.3	2.55372	19.1241	13.0309	0.501431	13.6687	0.0695491	4.12647	0.301893	433.439	17.2977	412.671	46.3835	298.132	298.386	433.439	17.2977	145.385
76	63.8536	6956.03	3.46725	18.5399	17.6878	0.517632	18.0204	0.069603	3.44623	0.19124	433.763	14.4567	423.568	62.488	368.425	401.278	433.763	14.4567	117.734
25	103.357	18995.4	1.61748	18.5981	15.4968	0.516372	15.8659	0.0696515	3.40208	0.214427	434.056	14.2807	422.725	54.9129	361.362	351.47	434.056	14.2807	120.116
45	359.655	93417.1	1.96276	18.358	2.73835	0.52363	2.93136	0.0697188	1.04609	0.356861	434.461	4.39507	427.574	10.2296	390.596	61.4465	434.461	4.39507	111.23
28	341.342	42148	1.87181	18.3472	4.2484	0.524537	5.26252	0.0697981	3.10568	0.590151	434.939	13.0623	428.178	18.3869	391.924	95.3618	434.939	13.0623	110.975
68	79.3528	6101.54	2.26865	17.0162	7.58983	0.565986	8.5047	0.0698502	3.83725	0.451192	435.253	16.1504	455.415	31.2208	558.483	165.714	435.253	16.1504	77.9349
7	278.618	48442.4	5.28734	18.1524	2.42316	0.531005	2.93163	0.0699089	1.65007	0.562851	435.607	6.95036	432.477	10.3247	415.818	54.1719	435.607	6.95036	104.759
1	211.242	37653.9	3.8897	18.3163	2.59045	0.527033	3.10928	0.0700125	1.71965	0.553069	436.231	7.25345	429.839	10.8967	395.697	58.1157	436.231	7.25345	110.244
84	129.703	24964	3.05941	18.2851	9.91479	0.527988	10.1976	0.0700195	2.38485	0.233865	436.273	10.0602	430.473	35.794	399.528	222.653	436.273	10.0602	109.197
71	441.625	108987	1.6635	17.6308	2.02115	0.547874	2.68076	0.0700571	1.76108	0.656933	436.5	7.43262	443.603	9.63485	480.594	44.6608	436.5	7.43262	90.8251
4	465.374	96965.8	2.88076	18.0961	1.95512	0.534246	2.61766	0.0701175	1.74058	0.664938	436.863	7.35202	434.624	9.25552	422.751	43.6363	436.863	7.35202	103.338
24	216.442	25179.4	1.8017	18.213	2.5535	0.531397	3.40203	0.0701939	2.24798	0.660777	437.324	9.5049	432.736	11.9872	408.369	57.1338	437.324	9.5049	107.09
17	214.651	45563.4	4.07355	19.1119	5.77519	0.507186	6.47809	0.0703022	2.93476	0.453029	437.976	12.4267	416.555	22.1384	299.551	131.818	437.976	12.4267	146.211
97	193.683	21645.4	2.22365	18.3612	6.60876	0.528181	7.04227	0.0703367	2.43266	0.345436	438.184	10.3053	430.602	24.7193	390.212	148.493	438.184	10.3053	112.294
94	315.691	69371	3.24415	18.4327	2.84042	0.52746	3.53817	0.0705144	2.10966	0.596256	439.254	8.95809	430.122	12.4065	381.473	63.8615	439.254	8.95809	115.147
16	384.647	54152.3	3.89304	18.0587	2.28489	0.5396	3.0679	0.0706736	2.04726	0.667316	440.213	8.71147	438.161	10.9182	427.373	50.9579	440.213	8.71147	103.004
98	328.225	58416.1	3.40695	18.3769	3.71447	0.532812	4.53885	0.071014	2.60843	0.574688	442.262	11.1493	433.674	16.0213	388.294	83.4087	442.262	11.1493	113.899
15	425.593	66503.8	2.90002	18.1756	3.49666	0.538865	3.90946	0.0710342	1.7485	0.447247	442.384	7.47562	437.676	13.9012	412.966	78.1943	442.384	7.47562	107.124
53	227.719	31623.5	1.99063	17.3071	3.05679	0.56596	3.7964	0.0710411	2.25138	0.59303	442.425	9.62655	455.398	13.9327	521.396	67.0857	442.425	9.62655	84.8539
66	378.079	171091	4.04816	18.1565	2.78703	0.539652	3.01584	0.0710631	1.15228	0.382077	442.557	4.9284	438.195	10.7336	415.32	62.2777	442.557	4.9284	106.558
56	129.028	28868.2	2.49578	18.272	7.20962	0.537136	7.56443	0.0711819	2.28954	0.302671	443.272	9.80782	436.534	26.846	401.126	161.713	443.272	9.80782	110.507
59	300.449	40033.9	2.77172	18.103	2.06329	0.542164	2.80322	0.0711838	1.89761	0.676937	443.284	8.12908	439.851	10.007	421.902	46.0666	443.284	8.12908	105.068
11	97.3813	9882.21	2.8528	18.1425	6.00388	0.541692	6.39853	0.0712769	2.21239	0.345766	443.844	9.48917	439.54	22.8317	417.038	134.223	443.844	9.48917	106.428
44	133.531	23811.8	2.71563	18.0132	7.57545	0.546126	7.72176	0.0713482	1.49607	0.193748	444.273	6.42278	442.456	27.7014	432.995	168.976	444.273	6.42278	102.605
9	428.01	49877.9	4.28659	18.4147	2.31734	0.535486	2.70657	0.0715173	1.39838	0.51666	445.29	6.01665	435.444	9.5844	383.678	52.0747	445.29	6.01665	116.058
93	244.787	33934.4	2.91235	18.0518	2.14062	0.54671	2.39327	0.0715774	1.07027	0.447199	445.652	4.60854	442.839	8.58974	428.227	47.7532	445.652	4.60854	104.069
73	189.784	24323.8	2.68542	19.16	3.82425	0.516911	4.13769	0.0718309	1.57975	0.381795	447.177	6.82483	423.086	14.3177	293.811	87.3318	447.177	6.82483	152.199
92	160.029	42537.5	3.12657	18.0313	7.22841	0.549788	7.36	0.0718985	1.38554	0.188253	447.584	5.99107	444.858	26.5173	430.761	161.293	447.584	5.99107	103.905
58	696.093	116465	2.86989	17.9744	2.04254	0.551947	2.7704	0.0719533	1.87167	0.675596	447.913	8.09885	446.271	10.0048	437.798	45.4892	447.913	8.09885	102.31
64	459.366	94597.8	2.83174	18.2975	2.70381	0.542993	2.87477	0.0720583	0.976564	0.339702	448.545	4.23141	440.396	10.2725	398.005	60.6255	448.545	4.23141	112.698
63	194.508	36586.8	2.51713	18.3336	6.5099	0.542212	6.82639	0.0720967	2.05447	0.30096	448.775	8.90635	439.882	24.3742	393.587	146.17	448.775	8.90635	114.022
78	170.283	18762	2.2001	17.8144	4.93565	0.558254	5.27452	0.0721278	1.86008	0.352654	448.963	8.06689	450.389	19.1893	457.69	109.548	448.963	8.06689	98.0931
6	72.5733	8592.19	3.61617	19.0351	9.51043	0.524167	9.80377	0.0723642	2.38024	0.242788	450.384	10.3543	427.931	34.2472	308.767	216.987	450.384	10.3543	145.865
74	221.511	45983.9	2.00069	17.9226	6.0245	0.556783	6.32923	0.0723746	1.94023	0.306552	450.446	8.44135	449.43	22.9886	444.215	134.055	450.446	8.44135	101.403
51	130.602	43079.1	2.45321	18.124	6.82372	0.550787	7.08177	0.0723996	1.8943	0.267489	450.596	8.24415	445.512	25.5443	419.321	152.54	450.596	8.24415	107.459
31	212.174	30776.9	2.01873	18.0897	5.57835	0.552084	6.05399	0.072433	2.35219	0.388535	450.797	10.2413	446.361	21.869	423.542	124.547	450.797	10.2413	106.435
54	320.625	42697.7	7.50604	17.7164	1.94708	0.564447	2.81293	0.0725268	2.03014	0.721716	451.361	8.84981	454.417	10.3054	469.884	43.1123	451.361	8.84981	96.0579
99	143.57	21517.9	2.28096	17.7209	11.8067	0.564375	12.1357	0.0725356	2.80663	0.231271	451.414	12.2361	454.37	44.4835	469.361	262.177	451.414	12.2361	96.1762
67	982.945	255902	2.98989	17.8712	1.40474	0.561697	1.98809	0.072804	1.40684	0.707633	453.027	6.15455	452.63	7.26069	450.596	31.2212	453.027	6.15455	100.539
21	296.365	22876.9	2.55243	18.0066	4.15501	0.55823	4.58565	0.0729026	1.94013	0.423088	453.619	8.4983	450.374	16.6821	433.817	92.6028	453.619	8.4983	104.565
85	1081.27	84188.7	4.49264	17.8307	0.961039	0.568083	2.07403	0.073465	1.83794	0.886166	456.997	8.10852	456.774	7.62951	455.631	21.3325	456.997	8.10852	100.3
43	365.962	147281	3.41193	17.9239	1.70947	0.566927	3.05812	0.0736984	2.53571	0.829172	458.399	11.22	456.025	11.2352	444.057	38.0327	458.399	11.22	103.23
57	522.217	74852	2.33063	17.6364	1.91664	0.577969	3.39256	0.0739286	2.79927	0.825121	459.781	12.4223	463.156	12.6179	479.904	42.3558	459.781	12.4223	95.8068
38	50.3264	5648	4.16825	15.3557	12.2458	0.672823	12.6834	0.0749323	3.30314	0.26043	465.803	14.8434	522.428	51.8436	778.274	258.375	465.803	14.8434	59.8507
62	533.845	64371.5	2.7861	17.8902	1.82652	0.578058	2.25366	0.0750041	1.32015	0.585783	466.234	5.9377	463.212	8.38254	448.239	40.6071	466.234	5.9377	104.015
86	374.072	49028.8	3.09584	17.9876	1.91304	0.579028	2.85458	0.0755392	2.11871	0.742213	469.442	9.59258	463.837	10.6291	436.159	42.5979	469.442	9.59258	107.631
40	164.898	25084.7	2.37028	17.7498	5.715	0.624026	6.91097	0.0803332	3.8859	0.56228	498.111	18.6273	492.368	26.97	465.718	126.674	498.111	18.6273	106.956
42	162.378	44236.6	5.88538	16.3992	2.60463	0.848121	3.21049	0.100874	1.87701	0.584648	619.528	11.0873	623.617	14.961	638.502	56.0466	619.528	11.0873	97.0284
52	24.1686	18764.1	0.728849	8.97825	1.49183	5.06553	2.93291	0.329849	2.52515	0.860973	1837.65	40.3761	1830.35	24.8755	1822.04	27.0704	1822.04	27.0704	100.857
22	97.3181	60064.5	1.45518	8.92833	1.02319	5.15649	2.2374	0.333905	1.98973	0.889306	1857.28	32.1081	1845.47	19.0303	1832.15	18.5426	1832.15	18.5426	101.372
27	201.271	106674	1.92998	8.5895	0.411393	5.49323	1.88123	0.342211	1.8357	0.975796	1897.3	30.1715	1899.54	16.1613	1901.97	7.39356	1901.97	7.39356	99.7545
34	182.666	119739	0.696629	8.53476	0.504024	5.66192	1.78798	0.350472	1.71547	0.959445	1936.85	28.6994	1925.58	15.4309	1913.45	9.0459	1913.45	9.0459	101.223
13	71.1082	94338	2.1924	6.31509	0.664793	10.0753	2.63003	0.461463	2.54463	0.967526	2446.02	51.7966	2441.71	24.2984	2438.11	11.262	2438.11	11.262	100.324
Rejected Analyses: >10% discordant; >5% rev discordant; >10% 2s err; grains <500 Ma-evaluated by 1s err concordance; 1200 Ma cutoff
79	221.475	2044.44	2.64786	18.0185	3.83144	0.460091	4.4959	0.0601258	2.35228	0.523206	376.39	8.60025	384.321	14.386	432.343	85.3912	376.39	8.60025	NA
50	50.1507	1761.24	1.54612	15.0985	15.4141	0.598485	16.3554	0.0655369	5.4686	0.33436	409.21	21.6827	476.272	62.2558	813.731	324.045	409.21	21.6827	NA
70	53.6514	7509.48	2.40593	18.2021	14.9849	0.510778	15.9901	0.0674299	5.57996	0.348963	420.653	22.7229	418.972	54.9461	409.708	336.84	420.653	22.7229	NA
35	49.323	5847.64	2.88571	17.5025	19.5908	0.547761	20.3847	0.069533	5.6337	0.276369	433.342	23.6108	443.529	73.3798	496.73	435.401	433.342	23.6108	NA
23	45.0138	9540.11	2.52691	16.4568	16.8783	0.588032	17.9155	0.0701852	6.00725	0.33531	437.271	25.397	469.61	67.4588	630.948	365.918	437.271	25.397	NA
88	97.2333	18675.3	2.66277	17.3821	8.05049	0.596789	10.0535	0.0752354	6.02181	0.598977	467.621	27.1623	475.194	38.1702	511.919	177.196	467.621	27.1623	NA
J1118, Clarence River Group, Buckland Hills Formation						(n=106/121)
22	1037.12	69908.2	7.60162	18.1708	0.685953	0.508677	1.60076	0.0670371	1.44634	0.903534	418.28	5.85768	417.559	5.48034	413.555	15.3333	418.28	5.85768	101.143
17	230.572	13931.1	2.54892	18.0189	3.38634	0.523862	4.02999	0.0684609	2.18483	0.542144	426.877	9.02445	427.728	14.068	432.297	75.4671	426.877	9.02445	98.7462
90	543.296	87519.6	5.20179	18.0506	1.93534	0.523273	2.11782	0.0685046	0.860027	0.40609	427.14	3.55446	427.335	7.38717	428.368	43.1734	427.14	3.55446	99.7133
60	203.385	46826.3	3.1894	19.1934	5.54046	0.493913	6.22115	0.0687543	2.82949	0.454818	428.646	11.7341	407.573	20.8875	289.859	126.672	428.646	11.7341	NA
101	470.701	34335.3	5.89944	17.6773	2.22965	0.538807	2.78118	0.0690792	1.66242	0.597737	430.606	6.92461	437.638	9.8883	474.807	49.3183	430.606	6.92461	90.6907
110	351.881	70783.4	3.61322	18.1815	0.961992	0.526242	1.48986	0.0693925	1.13765	0.763596	432.495	4.75885	429.312	5.21603	412.245	21.5092	432.495	4.75885	104.912
96	346.947	25578.6	2.76493	18.0071	3.57319	0.532501	4.3483	0.0695444	2.4779	0.569855	433.41	10.3864	433.468	15.3427	433.753	79.6282	433.41	10.3864	99.921
83	140.446	16141.1	2.39773	18.2045	8.69993	0.531076	9.08023	0.0701186	2.60035	0.286375	436.87	10.9838	432.523	31.9912	409.417	194.913	436.87	10.9838	NA
105	384.652	13655.3	2.95339	17.8998	2.54521	0.540385	3.26923	0.0701537	2.05177	0.627601	437.082	8.67066	438.678	11.6458	447.045	56.5708	437.082	8.67066	97.7713
125	1013.39	18420.1	3.655	17.9596	0.738597	0.540276	1.1886	0.0703737	0.931253	0.783491	438.406	3.94694	438.606	4.23334	439.634	16.449	438.406	3.94694	99.7207
53	559.094	92979.3	6.57142	17.875	1.43139	0.54509	4.05051	0.0706665	3.78916	0.935478	440.17	16.1221	441.775	14.5105	450.126	31.8151	440.17	16.1221	97.7882
107	180.298	35191.1	3.4189	17.6869	4.17819	0.56871	4.23998	0.0729526	0.721252	0.170107	453.92	3.1613	457.18	15.6091	473.601	92.4834	453.92	3.1613	95.8444
24	144.106	24122.8	1.91443	17.6387	4.49393	0.57222	5.5958	0.073203	3.3343	0.595857	455.424	14.6612	459.449	20.6825	479.608	99.3736	455.424	14.6612	94.9576
120	647.321	12720.5	4.31296	17.4627	1.99959	0.594506	3.14182	0.0752952	2.42336	0.771325	467.979	10.939	473.741	11.8949	501.745	44.0145	467.979	10.939	93.2703
50	576.305	160849	1.36076	17.5952	1.78382	0.616586	2.5589	0.0786839	1.83466	0.716972	488.262	8.62713	487.705	9.91043	485.097	39.3851	488.262	8.62713	100.652
47	170.539	38299.8	1.97618	17.1693	2.49565	0.638988	3.818	0.0795691	2.88943	0.756793	493.55	13.7286	501.68	15.1152	538.91	54.592	493.55	13.7286	91.5831
6	207.053	24977.7	1.19529	17.1205	3.86159	0.652098	4.06522	0.0809705	1.27048	0.312525	501.913	6.13479	509.769	16.294	545.181	84.4331	501.913	6.13479	92.0635
41	510.45	104440	5.67213	14.3244	0.776084	1.49246	7.60832	0.155053	7.56864	0.994784	929.224	65.498	927.319	46.2907	922.812	15.9497	922.812	15.9497	100.695
117	323.421	142114	1.51136	14.1143	0.575004	1.54399	1.17152	0.158053	1.0207	0.871261	945.947	8.98028	948.096	7.21963	953.071	11.7621	945.947	8.98028	99.2525
106	267.672	72273.8	1.79593	14.1073	1.05559	1.51603	1.75635	0.155114	1.40374	0.799238	929.565	12.1515	936.877	10.7461	954.105	21.5786	929.565	12.1515	97.4279
103	442.407	229273	16.4021	14.0287	0.467253	1.59572	3.47856	0.162359	3.44704	0.990938	969.87	31.0386	968.539	21.7168	965.539	9.55198	965.539	9.55198	100.449
19	179.256	50249.2	2.25018	12.8676	1.51504	1.86215	1.7495	0.173784	0.874864	0.500065	1032.93	8.34989	1067.75	11.558	1139.59	30.1333	1032.93	8.34989	90.64
76	434.279	208377	10.386	13.4351	0.682925	1.79565	0.951402	0.174969	0.662404	0.69624	1039.43	6.35881	1043.88	6.20495	1053.22	13.7765	1039.43	6.35881	98.6907
37	180.46	36687.6	194.588	13.3936	1.13638	1.8241	1.9397	0.177192	1.57197	0.810417	1051.62	15.2532	1054.16	12.722	1059.45	22.8892	1051.62	15.2532	99.2603
58	356.632	143847	3.40002	13.279	0.836519	1.90543	1.24797	0.183508	0.926105	0.742088	1086.11	9.25685	1082.99	8.3105	1076.73	16.7924	1086.11	9.25685	100.872
88	75.6604	8416.39	2.8767	13.3266	4.6883	1.89987	4.86757	0.183629	1.30887	0.268895	1086.77	13.09	1081.04	32.3918	1069.54	94.2568	1086.77	13.09	101.611
94	438.121	170563	4.91095	13.0727	0.492008	1.97073	0.942265	0.186849	0.803611	0.852851	1104.29	8.15569	1105.56	6.34706	1108.04	9.84917	1104.29	8.15569	99.6607
21	437.092	143985	7.54296	13.016	1.06797	1.99095	4.12148	0.187948	3.98071	0.965844	1110.25	40.5999	1112.45	27.864	1116.76	21.3133	1110.25	40.5999	99.4173
56	96.4638	59242.3	1.39575	13.023	2.49849	1.99864	2.82208	0.188775	1.31213	0.464953	1114.73	13.432	1115.05	19.1012	1115.65	49.8547	1114.73	13.432	99.9179
79	68.702	24717.8	2.73349	12.9992	2.7658	2.04163	2.92468	0.192483	0.950847	0.325112	1134.81	9.89395	1129.5	19.9358	1119.33	55.182	1134.81	9.89395	101.383
89	184.094	107341	3.71561	12.6515	1.08374	2.12138	1.63176	0.194652	1.21989	0.747592	1146.53	12.8132	1155.79	11.2609	1173.21	21.4582	1146.53	12.8132	97.7259
82	89.2716	23470.1	3.67278	12.4051	1.80964	2.27719	2.11405	0.20488	1.0929	0.51697	1201.48	11.98	1205.25	14.9168	1212.02	35.5967	1212.02	35.5967	99.1301
18	117.144	170946	2.77352	12.3923	2.38036	2.32339	3.24692	0.208821	2.20826	0.680107	1222.53	24.5913	1219.46	23.0525	1214.01	46.8442	1214.01	46.8442	100.702
26	385.802	253955	5.14412	11.9002	1.28552	2.41124	2.17263	0.208111	1.75151	0.806167	1218.75	19.45	1245.95	15.5948	1293.28	24.9991	1293.28	24.9991	94.2372
25	126.816	54215.5	1.36644	11.6935	1.48696	2.6311	1.99918	0.223141	1.3363	0.668422	1298.45	15.7154	1309.37	14.71	1327.29	28.7882	1327.29	28.7882	97.8273
23	491.319	162033	1.73393	11.4885	0.501574	2.64535	5.99244	0.220417	5.97141	0.996491	1284.08	69.5263	1313.35	44.1826	1361.44	9.66448	1361.44	9.66448	94.3179
1	491.487	254923	2.66408	11.0327	0.3055	2.94644	0.862534	0.235764	0.806619	0.935174	1364.64	9.9204	1393.93	6.53889	1439.02	5.82382	1439.02	5.82382	94.8309
80	121.649	32568.6	2.15421	10.905	1.45412	3.1738	1.57995	0.251017	0.617876	0.391073	1443.72	7.99207	1450.81	12.1995	1461.19	27.6389	1461.19	27.6389	98.8042
38	96.9051	36818.7	1.87339	10.8963	1.49035	3.23929	2.08997	0.255994	1.4652	0.701064	1469.31	19.2513	1466.62	16.2167	1462.69	28.3219	1462.69	28.3219	100.453
97	109.068	73502.4	2.25671	10.8075	0.91543	3.31263	3.11431	0.259655	2.97673	0.955823	1488.08	39.5556	1484.03	24.2944	1478.23	17.3595	1478.23	17.3595	100.666
98	160.195	209907	3.05367	10.457	1.15264	3.3381	2.24061	0.253167	1.92139	0.857531	1454.79	25.0227	1490.01	17.5081	1540.49	21.6779	1540.49	21.6779	94.4368
43	217.574	167950	2.59332	10.0027	0.461378	3.98035	1.2934	0.288761	1.20831	0.934212	1635.33	17.4527	1630.2	10.4964	1623.56	8.58178	1623.56	8.58178	100.725
33	121.354	95995.1	1.40217	9.89375	1.04101	4.09103	2.39157	0.293557	2.15312	0.900294	1659.28	31.4989	1652.52	19.5161	1643.91	19.3148	1643.91	19.3148	100.935
54	292.666	175394	1.6104	9.85434	0.337149	4.17757	2.00496	0.298573	1.97641	0.98576	1684.23	29.2942	1669.63	16.4275	1651.31	6.24992	1651.31	6.24992	101.993
69	578.366	382840	2.03003	9.80279	0.172663	4.01253	0.71837	0.285277	0.697311	0.970685	1617.88	9.97735	1636.74	5.83908	1661.03	3.19506	1661.03	3.19506	97.4025
92	190.408	88064.9	2.52867	9.79251	0.872214	4.13208	1.65406	0.293469	1.4054	0.849669	1658.84	20.5554	1660.67	13.5233	1662.97	16.1432	1662.97	16.1432	99.7515
7	782.648	318804	8.8746	9.53088	0.214368	4.2107	2.21044	0.291062	2.20002	0.995286	1646.84	31.9733	1676.11	18.139	1712.93	3.94292	1712.93	3.94292	96.1414
15	149.459	76273.1	1.78282	9.38595	0.86987	4.56509	1.3345	0.310761	1.01204	0.758365	1744.45	15.4675	1742.92	11.1159	1741.07	15.9418	1741.07	15.9418	100.194
44	145.378	69471.5	4.54944	9.37141	0.911509	4.70023	4.23437	0.319465	4.1351	0.976556	1787.12	64.5423	1767.28	35.4668	1743.9	16.6991	1743.9	16.6991	102.478
71	66.1618	66868.1	0.645617	9.07536	1.16627	4.87912	1.69914	0.321147	1.23567	0.727235	1795.33	19.3631	1798.66	14.3191	1802.5	21.2127	1802.5	21.2127	99.602
87	168.391	145938	2.68082	9.05278	0.740212	4.83641	1.07791	0.317544	0.783566	0.726931	1777.72	12.174	1791.25	9.06987	1807.03	13.4549	1807.03	13.4549	98.3782
75	38.1149	33485.8	0.572711	9.04379	1.54264	5.14909	2.19392	0.337738	1.55998	0.711046	1875.78	25.3891	1844.24	18.656	1808.84	28.038	1808.84	28.038	103.701
9	50.4659	27125.7	1.94482	8.99624	1.66522	5.00824	2.02069	0.326772	1.14466	0.566468	1822.72	18.1737	1820.72	17.1045	1818.41	30.2308	1818.41	30.2308	100.237
28	205.704	121437	0.736874	8.98708	0.551363	4.8502	2.86499	0.316138	2.81144	0.981307	1770.84	43.5339	1793.65	24.1226	1820.26	10.0054	1820.26	10.0054	97.2851
5	127.234	62746.9	2.18283	8.97943	0.500608	5.06008	1.42195	0.329537	1.33091	0.935978	1836.14	21.2654	1829.44	12.0563	1821.8	9.08252	1821.8	9.08252	100.787
112	33.8459	49975.9	1.03066	8.95186	1.30254	4.9356	1.65721	0.320444	1.02456	0.618247	1791.9	16.0284	1808.36	13.9929	1827.38	23.6196	1827.38	23.6196	98.0582
116	39.9003	35753.1	0.69804	8.92383	2.00166	5.00901	3.4288	0.324192	2.78389	0.811914	1810.17	43.9368	1820.85	29.0295	1833.07	36.2733	1833.07	36.2733	98.7508
29	69.2441	48329.6	0.908419	8.89651	1.05107	5.14737	1.24821	0.332127	0.673257	0.539377	1848.68	10.8208	1843.96	10.6128	1838.62	19.033	1838.62	19.033	100.547
51	95.918	115209	1.50806	8.89566	1.32902	5.20172	1.75917	0.335602	1.15255	0.655169	1865.48	18.6693	1852.9	14.9832	1838.79	24.0647	1838.79	24.0647	101.451
4	99.9415	38469.6	1.59149	8.89391	0.855508	5.15692	1.49867	0.332646	1.2305	0.821058	1851.19	19.8001	1845.54	12.7463	1839.15	15.4901	1839.15	15.4901	100.655
14	164.499	23918.2	1.56187	8.87847	0.762156	5.17257	1.18315	0.333076	0.904968	0.764879	1853.27	14.5761	1848.11	10.0676	1842.3	13.7943	1842.3	13.7943	100.596
46	110.207	79541.5	1.15242	8.87785	0.976754	5.17156	1.24258	0.332988	0.768084	0.618137	1852.85	12.3689	1847.95	10.573	1842.42	17.6788	1842.42	17.6788	100.566
45	166.176	95372.4	4.55404	8.87773	0.890472	5.13412	1.23354	0.330572	0.853624	0.692013	1841.16	13.6714	1841.77	10.4836	1842.45	16.1168	1842.45	16.1168	99.9299
122	145.152	250069	1.31335	8.83679	0.343258	5.23153	1.10202	0.335291	1.0472	0.950252	1863.98	16.9509	1857.77	9.39433	1850.81	6.20513	1850.81	6.20513	100.711
20	55.2028	29347.3	0.926155	8.82137	1.59036	5.1843	3.46322	0.331684	3.07646	0.888325	1846.54	49.3972	1850.04	29.487	1853.96	28.747	1853.96	28.747	99.5996
8	116.144	65969.7	1.28474	8.77775	1.20245	5.32025	1.98276	0.338699	1.57653	0.795118	1880.41	25.7131	1872.12	16.9488	1862.92	21.7107	1862.92	21.7107	100.939
34	71.689	42251.5	1.17347	8.73038	0.99004	5.1864	2.29112	0.328396	2.06617	0.901816	1830.6	32.9275	1850.39	19.5056	1872.68	17.8539	1872.68	17.8539	97.7529
42	74.3607	13574.7	1.21048	8.63097	2.56276	5.26593	3.35216	0.329635	2.16084	0.644613	1836.61	34.534	1863.36	28.6127	1893.31	46.1072	1893.31	46.1072	97.0056
63	233.291	146754	1.41317	8.61007	0.37789	5.50736	0.620143	0.343913	0.491708	0.792894	1905.47	8.11154	1901.75	5.32923	1897.67	6.79495	1897.67	6.79495	100.411
36	59.3847	15470.6	1.82993	8.55417	4.98514	5.49285	5.24684	0.34078	1.63637	0.311877	1890.42	26.8114	1899.48	45.0999	1909.37	89.5613	1909.37	89.5613	99.0074
13	557.411	163978	3.87423	8.5536	0.229634	5.65275	2.92257	0.350677	2.91354	0.996908	1937.83	48.7644	1924.18	25.2199	1909.49	4.12327	1909.49	4.12327	101.484
10	93.3665	45878.6	0.918888	8.54709	1.0931	5.48285	1.7681	0.339878	1.38971	0.785991	1886.08	22.7249	1897.91	15.1848	1910.86	19.623	1910.86	19.623	98.7034
100	73.4519	41189.2	1.48757	8.50241	0.986134	5.68348	1.67249	0.350473	1.35084	0.80768	1936.86	22.5991	1928.86	14.4422	1920.26	17.6826	1920.26	17.6826	100.864
3	129.005	132246	2.05827	8.50206	0.624017	5.75558	3.21688	0.354905	3.15577	0.981005	1957.98	53.2889	1939.76	27.8355	1920.34	11.1884	1920.34	11.1884	101.96
65	82.1866	71744.2	0.629364	8.48777	0.894056	5.71282	2.49396	0.351676	2.3282	0.933534	1942.6	39.0493	1933.31	21.5541	1923.35	16.0254	1923.35	16.0254	101
66	39.1301	52102.8	0.292722	8.47899	2.0189	5.82343	2.23479	0.358114	0.95828	0.428802	1973.23	16.2891	1949.9	19.3685	1925.21	36.1833	1925.21	36.1833	102.494
67	98.7962	70298.2	1.24797	8.46032	0.699275	5.56448	1.26114	0.341436	1.04952	0.832199	1893.58	17.2207	1910.62	10.8551	1929.16	12.5249	1929.16	12.5249	98.1557
48	62.925	100395	0.513768	8.45793	1.70449	5.64726	2.23289	0.346418	1.44239	0.645976	1917.47	23.9235	1923.34	19.2639	1929.66	30.5326	1929.66	30.5326	99.3684
85	118.082	63021.7	1.37101	8.43871	0.848693	5.76195	1.39263	0.35265	1.10415	0.79285	1947.24	18.5569	1940.71	12.0499	1933.73	15.1935	1933.73	15.1935	100.698
124	115.226	449503	1.49812	8.42831	0.506526	5.82897	1.22616	0.356312	1.11665	0.910686	1964.67	18.9107	1950.73	10.6275	1935.94	9.06471	1935.94	9.06471	101.484
39	158.461	136952	3.1774	8.20093	0.457006	6.10236	0.991472	0.362961	0.879865	0.887433	1996.19	15.1047	1990.59	8.65	1984.75	8.13356	1984.75	8.13356	100.577
16	127.896	77385.3	0.592011	8.0816	1.05057	6.29919	2.29796	0.369216	2.04375	0.889376	2025.71	35.5271	2018.34	20.1391	2010.79	18.6395	2010.79	18.6395	100.742
49	39.7378	33341.4	1.14715	7.89575	2.12941	6.13673	2.35939	0.351422	1.01605	0.43064	1941.39	17.0323	1995.49	20.6029	2051.97	37.6056	2051.97	37.6056	94.6108
12	148.368	90546.3	1.79718	7.813	0.423236	6.76832	1.36325	0.383528	1.29589	0.950586	2092.74	23.1578	2081.59	12.0609	2070.56	7.45639	2070.56	7.45639	101.071
30	126.935	108001	2.89146	7.76885	0.625792	6.80903	0.989594	0.383654	0.766603	0.774664	2093.33	13.7026	2086.9	8.76165	2080.54	11.0137	2080.54	11.0137	100.615
108	88.0967	98572	1.34371	7.7099	0.598159	6.69377	0.96525	0.374299	0.757571	0.784844	2049.6	13.3009	2071.8	8.5273	2093.93	10.5134	2093.93	10.5134	97.8826
93	111.594	164722	1.35473	7.46879	0.918395	6.78236	1.37643	0.367392	1.02524	0.744852	2017.12	17.7574	2083.42	12.1808	2149.6	16.0398	2149.6	16.0398	93.837
52	303.169	66422.5	2.83737	6.82525	0.70586	8.00558	2.42323	0.396287	2.31814	0.956635	2151.92	42.4131	2231.65	21.8762	2305.62	12.1204	2305.62	12.1204	93.3336
84	76.5684	57043.2	2.00745	6.7895	0.795823	8.73861	1.34066	0.430307	1.0789	0.804754	2307.1	20.9242	2311.11	12.2156	2314.64	13.6526	2314.64	13.6526	99.6743
11	42.6499	40134.4	1.65736	6.71763	1.82163	8.65891	3.79988	0.421869	3.33478	0.877601	2268.96	63.7849	2302.77	34.6022	2332.88	31.1938	2332.88	31.1938	97.2599
64	191.747	244224	5.37665	6.66088	1.58228	9.43759	1.82506	0.455923	0.909517	0.498349	2421.53	18.3605	2381.49	16.7574	2347.39	27.0551	2347.39	27.0551	103.158
61	40.484	47720.1	1.57151	6.59483	1.37671	9.16712	2.01975	0.438465	1.47786	0.731703	2343.77	29.0395	2354.83	18.4931	2364.42	23.495	2364.42	23.495	99.1264
78	128.375	82034	1.77613	6.55435	0.832814	9.36292	2.50073	0.445082	2.35798	0.942917	2373.35	46.818	2374.2	22.9456	2374.92	14.1974	2374.92	14.1974	99.9339
68	248.278	164365	1.96124	6.52386	0.380642	9.25511	1.11824	0.43791	1.05146	0.940283	2341.28	20.6427	2363.58	10.2476	2382.87	6.48213	2382.87	6.48213	98.2545
99	60.2553	129423	1.63127	6.41123	1.01039	9.64736	1.58646	0.448589	1.2231	0.770958	2388.98	24.4165	2401.7	14.5967	2412.49	17.1589	2412.49	17.1589	99.0254
77	77.9618	85380.8	2.01821	6.15087	0.76046	10.5475	1.07494	0.470527	0.759734	0.706769	2485.87	15.6708	2484.1	9.96987	2482.64	12.825	2482.64	12.825	100.13
73	23.913	16825.4	1.34037	5.63187	1.41107	12.3249	2.49199	0.503425	2.05399	0.824238	2628.5	44.3381	2629.47	23.4084	2630.21	23.4539	2630.21	23.4539	99.9351
111	36.7991	72551.1	2.13646	5.50803	0.955802	12.8735	1.2429	0.514272	0.794511	0.639239	2674.84	17.3943	2670.44	11.7111	2667.1	15.8327	2667.1	15.8327	100.29
102	175.697	229478	2.30996	5.45332	0.136762	12.7504	1.21899	0.504295	1.21129	0.993686	2632.23	26.177	2661.39	11.4777	2683.62	2.26182	2683.62	2.26182	98.085
57	35.1014	46660.4	0.640543	5.44813	1.24425	12.9369	2.37513	0.511183	2.02314	0.8518	2661.68	44.1174	2675.07	22.3899	2685.19	20.5728	2685.19	20.5728	99.1243
114	107.458	177138	1.84166	5.43128	0.428704	12.7011	3.6956	0.500314	3.67065	0.993249	2615.14	78.9121	2657.74	34.7993	2690.31	7.08253	2690.31	7.08253	97.2062
59	179.198	211673	3.75878	5.4067	0.225753	12.5116	0.862752	0.490618	0.832693	0.965159	2573.35	17.6677	2643.6	8.11206	2697.8	3.72877	2697.8	3.72877	95.3869
55	25.5872	20159.8	0.875752	5.31187	1.45412	13.8722	2.4375	0.534433	1.95626	0.802567	2760.1	43.9234	2741.02	23.0898	2726.99	23.9501	2726.99	23.9501	101.214
40	109.133	199740	6.09484	5.03608	0.846157	15.1887	1.84936	0.554771	1.64443	0.889189	2844.98	37.8256	2827.15	17.6199	2814.44	13.8269	2814.44	13.8269	101.085
81	78.4794	75314.7	3.47235	4.66985	0.965627	17.0347	1.47694	0.576948	1.11755	0.756666	2936.28	26.3577	2936.79	14.166	2937.12	15.6052	2937.12	15.6052	99.9715
119	88.22	186759	2.32121	4.28671	0.218757	19.8168	0.840601	0.616108	0.811638	0.965544	3094.41	19.9466	3082.46	8.12548	3074.67	3.49502	3074.67	3.49502	100.642
Rejected Analyses: >10% discordant; >5% rev discordant; >10% 2s err; grains <500 Ma-evaluated by 1s err concordance; 1200 Ma cutoff
109	606.441	28557.9	3.22587	17.8926	0.868679	0.493585	2.68811	0.0640522	2.54388	0.946346	400.222	9.87157	407.351	9.02029	447.944	19.3105	400.222	9.87157	89.3465
121	345.425	82768.6	2.93699	16.4663	5.73851	0.583361	7.73961	0.0696679	5.19337	0.671012	434.155	21.8048	466.619	28.9617	629.663	123.701	434.155	21.8048	68.9503
118	962.191	319138	7.66748	16.7994	0.374394	0.632069	1.53929	0.0770119	1.49306	0.96997	478.263	6.8823	497.384	6.05314	586.401	8.11598	478.263	6.8823	81.5589
31	422.244	88977.7	243.541	16.853	4.88593	0.663024	6.11417	0.0810412	3.6757	0.601177	502.335	17.7633	516.462	24.7562	579.473	106.212	502.335	17.7633	86.6883
95	668.636	84078.9	34.9164	13.4345	5.12289	1.16831	5.54958	0.113836	2.13399	0.384531	694.986	14.0595	785.856	30.3709	1053.32	103.247	694.986	14.0595	65.9808
74	27.8188	13538.8	3.30098	13.9859	11.9857	1.6774	12.1455	0.170148	1.9639	0.161697	1012.93	18.4087	999.997	77.4125	971.74	245.28	971.74	245.28	104.238
113	300.061	125286	2.75371	13.7455	1.06368	1.47319	2.14257	0.146865	1.85989	0.868066	883.368	15.3537	919.44	12.9596	1007.01	21.5776	1007.01	21.5776	87.7222
2	617.234	125012	6.51691	10.8772	0.865008	2.40134	2.20163	0.189439	2.02458	0.919583	1118.33	20.7865	1243	15.7838	1466.03	16.4302	1118.33	20.7865	76.283
62	64.7682	18090	3.65942	12.3976	5.24331	2.42699	5.34259	0.218225	1.02516	0.191885	1272.49	11.8383	1250.63	38.4366	1213.2	103.236	1213.2	103.236	104.887
53b	8.48872	1173.73	0.723972	10.0174	15.3939	3.68112	38.9199	0.267444	35.7461	0.918453	1527.81	487.165	1567.28	321.053	1620.84	288.208	1620.84	288.208	94.2607
70	137.015	8510.42	1.07074	9.89902	2.66167	3.12074	8.32811	0.224052	7.89132	0.947552	1303.25	93.1207	1437.81	64.1262	1642.92	49.3995	1642.92	49.3995	79.325
35	159.907	173389	2.30822	6.25656	0.760704	8.79047	5.23044	0.398884	5.17483	0.989367	2163.9	95.1285	2316.5	47.7196	2453.87	12.8633	2453.87	12.8633	88.183
86	233.471	26123.8	2.05608	5.73446	0.470411	10.1843	1.58123	0.423566	1.50963	0.954723	2276.65	28.9558	2451.65	14.621	2600.16	7.8391	2600.16	7.8391	87.5581
32	524.529	58154.6	1.17506	5.17197	0.380698	9.67162	8.56849	0.362789	8.56003	0.999012	1995.38	146.924	2404.01	79.0094	2770.86	6.24544	2770.86	6.24544	72.013
27	255.767	111731	2.02421	5.06178	2.02461	9.81716	15.648	0.360403	15.5165	0.991595	1984.08	265.141	2417.76	145.18	2806.12	33.1048	2806.12	33.1048	70.7054
J1319, Clarence River Group, Buckland Hills Formation						(n=83/100)
33	307.096	50921	1.91662	17.8953	4.53994	0.506148	4.83604	0.0656925	1.66622	0.344542	410.152	6.62116	415.856	16.5032	447.605	100.928	410.152	6.62116	91.6325
79	304.502	31720.7	1.61601	18.5088	5.36931	0.495183	5.47127	0.0664726	1.05132	0.192152	414.869	4.22421	408.437	18.4008	372.21	120.978	414.869	4.22421	111.461
75	357.337	37123.9	1.87527	18.257	3.67077	0.502746	3.79187	0.0665698	0.950645	0.250706	415.457	3.82494	413.559	12.8816	402.962	82.22	415.457	3.82494	103.101
46	259.972	61335.5	1.76445	18.1561	6.14938	0.509744	6.27191	0.0671232	1.23366	0.196696	418.801	5.00233	418.277	21.5052	415.367	137.527	418.801	5.00233	100.827
96	523.865	60280.8	1.56816	18.4458	2.22428	0.504384	2.9721	0.0674775	1.97128	0.663261	420.94	8.03278	414.666	10.1184	379.876	50.0187	420.94	8.03278	110.81
20	139.781	15768.1	1.59351	20.5815	7.60665	0.452324	7.85509	0.0675188	1.95991	0.249508	421.19	7.99103	378.905	24.8458	127.988	179.209	421.19	7.99103	329.086
12	126.525	9128.7	1.2567	18.7449	11.2596	0.498161	11.5121	0.0677255	2.39791	0.208296	422.438	9.80493	410.457	38.8872	343.627	255.511	422.438	9.80493	122.935
25	104.985	36098	2.34804	21.9517	10.0485	0.427831	10.4913	0.0681145	3.01605	0.28748	424.786	12.3988	361.635	31.93	-25.8824	243.924	424.786	12.3988	NA
22	146.803	13404.6	2.22333	19.5192	6.60948	0.482611	7.76308	0.0683218	4.07187	0.524517	426.037	16.7869	399.863	25.6641	251.237	152.199	426.037	16.7869	169.575
8	228.775	1187.92	1.22709	16.4518	13.1698	0.575048	13.8187	0.0686147	4.18491	0.302843	427.804	17.3221	461.274	51.2717	631.601	284.771	427.804	17.3221	67.7333
81	141.014	15923.5	1.5711	18.0021	9.53515	0.525776	9.75856	0.0686471	2.07614	0.212751	428	8.59731	429.002	34.1577	434.371	212.797	428	8.59731	98.5333
63	124.317	14363.3	2.86052	18.1258	12.0327	0.527236	12.2705	0.0693108	2.40434	0.195944	432.002	10.0464	429.973	43.038	419.096	269.561	432.002	10.0464	103.08
54	90.5466	22172.7	4.54927	18.4768	11.3715	0.522065	11.7786	0.0699602	3.07007	0.260648	435.916	12.9405	426.53	41.0443	376.101	256.59	435.916	12.9405	115.904
55	180.096	34366	4.14209	18.9769	4.74561	0.515999	4.8728	0.0710186	1.10605	0.226985	442.29	4.72792	422.475	16.8422	315.694	107.961	442.29	4.72792	140.101
1	136.025	53550.4	3.84757	19.206	8.50152	0.5249	8.81856	0.0731159	2.34331	0.265725	454.901	10.2923	428.42	30.8316	288.338	194.6	454.901	10.2923	157.766
93	525.303	89341.1	3.35644	17.6614	1.46826	0.57098	2.26548	0.0731384	1.72528	0.761553	455.036	7.57997	458.648	8.36084	476.785	32.4721	455.036	7.57997	95.4383
83	243.228	36070.6	1.67259	16.7118	5.25963	0.619779	5.31967	0.0751203	0.796947	0.149811	466.931	3.58962	489.709	20.6707	597.734	113.982	466.931	3.58962	78.1168
86	461.084	7950.94	1.96676	18.3858	5.7445	0.56395	6.37445	0.0752006	2.76302	0.433453	467.412	12.4576	454.094	23.3435	387.203	129.072	467.412	12.4576	120.715
69	110.108	15745.7	1.36727	16.9639	6.09954	0.695115	7.81197	0.0855228	4.88083	0.624789	529.004	24.7889	535.869	32.5384	565.176	132.947	529.004	24.7889	93.5998
74	490.306	58450	2.52153	16.2861	1.2805	0.843558	1.87194	0.0996392	1.36547	0.729438	612.294	7.9759	621.107	8.69745	653.331	27.479	612.294	7.9759	93.7189
98	287.962	37242.6	1.67075	14.3337	1.9394	1.37305	3.47368	0.142739	2.88187	0.82963	860.133	23.2054	877.47	20.4107	921.485	39.8888	860.133	23.2054	93.342
85	200.775	74560.7	3.02298	14.1063	1.97368	1.55909	2.15148	0.159508	0.856416	0.398058	954.042	7.59472	954.107	13.31	954.255	40.3627	954.042	7.59472	99.9777
70	304.895	79666.1	7.83843	14.0263	1.78778	1.56134	2.25703	0.158833	1.37768	0.610395	950.286	12.1727	954.997	13.9709	965.885	36.5013	950.286	12.1727	98.385
39	656.082	212896	15.3926	13.9997	0.583122	1.60183	1.24902	0.162643	1.10455	0.88433	971.446	9.96073	970.926	7.80812	969.754	11.9163	971.446	9.96073	100.175
65	311.814	163150	2.91654	13.98	1.67597	1.60951	2.27018	0.163193	1.53128	0.674519	974.494	13.8491	973.919	14.2185	972.602	34.1809	974.494	13.8491	100.195
76	254.278	86538.2	2.34787	13.9096	2.22011	1.59458	2.6625	0.160864	1.46969	0.551998	961.578	13.1288	968.091	16.6164	982.927	45.2102	961.578	13.1288	97.828
47	245.72	70343.6	3.00911	13.2191	1.17584	1.8985	1.8457	0.182016	1.42268	0.770807	1077.98	14.1225	1080.56	12.2758	1085.76	23.555	1077.98	14.1225	99.2837
6	334.92	148326	1.84514	13.1848	1.1288	1.89136	1.53871	0.180861	1.04568	0.67958	1071.68	10.3244	1078.06	10.2205	1090.97	22.5943	1071.68	10.3244	98.2321
88	125.416	66842.5	2.96542	12.8282	2.81722	2.07801	3.46945	0.193336	2.02493	0.583647	1139.42	21.1486	1141.58	23.7874	1145.7	56.0082	1139.42	21.1486	99.4525
67	210.378	92127.3	4.88448	12.6773	1.84304	2.18269	2.28156	0.200687	1.34489	0.589459	1179.01	14.4908	1175.54	15.8889	1169.13	36.4881	1179.01	14.4908	100.844
95	368.919	82053.6	2.55901	12.4363	0.608239	2.20435	1.8658	0.198825	1.76387	0.945372	1169.01	18.8583	1182.42	13.0335	1207.07	11.9903	1169.01	18.8583	96.8464
58	72.891	16596.8	1.66068	11.8018	2.38457	2.68262	2.96466	0.229617	1.76154	0.594179	1332.49	21.2053	1323.68	21.9318	1309.42	46.286	1309.42	46.286	101.762
48	304.349	230380	1.91793	11.6501	1.20458	2.4993	3.93655	0.211176	3.74772	0.952032	1235.08	42.124	1271.83	28.556	1334.48	23.2964	1334.48	23.2964	92.5512
80	162.03	162966	3.35738	11.5851	1.65855	2.74739	2.15863	0.230845	1.38163	0.640048	1338.93	16.7043	1341.38	16.0708	1345.29	32.0301	1345.29	32.0301	99.5273
4	119.295	35049.2	2.24085	11.5274	2.18534	2.76047	2.56026	0.230788	1.33387	0.52099	1338.63	16.1236	1344.92	19.0856	1354.93	42.1484	1354.93	42.1484	98.7965
91	159.6	93668.1	2.80556	11.4578	1.28667	2.8332	1.51485	0.235439	0.799526	0.527794	1362.94	9.82218	1364.37	11.3693	1366.59	24.7745	1366.59	24.7745	99.733
59	77.4405	48530.6	1.62301	11.0253	2.36957	3.168	2.43669	0.253323	0.567972	0.233091	1455.59	7.40043	1449.4	18.8078	1440.3	45.1699	1440.3	45.1699	101.061
28	56.3548	14137	1.51731	11.0249	2.65618	3.1635	2.91674	0.252954	1.20502	0.41314	1453.69	15.6827	1448.3	22.5065	1440.37	50.6347	1440.37	50.6347	100.925
82	230.657	103584	2.45662	10.9188	0.577116	3.27153	1.11663	0.259073	0.955928	0.856083	1485.1	12.6799	1474.31	8.68394	1458.79	10.9725	1458.79	10.9725	101.804
38	39.9356	15858.8	2.30058	10.8993	3.74492	3.19638	4.46211	0.25267	2.42611	0.543713	1452.23	31.5464	1456.28	34.524	1462.18	71.1905	1462.18	71.1905	99.3195
51	38.851	7448.99	1.58003	10.7036	3.5661	3.33576	3.93127	0.258955	1.65463	0.420889	1484.49	21.9398	1489.46	30.7202	1496.53	67.4779	1496.53	67.4779	99.1955
68	103.349	48528.4	1.58225	10.6413	1.32279	3.318	1.88001	0.256078	1.33591	0.710587	1469.74	17.557	1485.29	14.6694	1507.56	24.9854	1507.56	24.9854	97.4917
72	134.879	85677.9	2.18392	10.5131	1.12756	3.47307	2.77943	0.264816	2.54044	0.914015	1514.44	34.2884	1521.12	21.916	1530.42	21.2328	1530.42	21.2328	98.9556
37	178.53	81500.9	2.53412	10.494	1.54204	3.50544	2.32466	0.266797	1.73959	0.74832	1524.53	23.6179	1528.44	18.3672	1533.85	29.0259	1533.85	29.0259	99.3921
87	282.732	182976	2.0339	10.1754	0.580594	3.68764	1.47888	0.272143	1.36014	0.919713	1551.67	18.7571	1568.7	11.8134	1591.66	10.8461	1591.66	10.8461	97.4875
84	611.41	90041.2	1.1687	10.1283	0.340663	3.74283	0.70676	0.274938	0.619239	0.876167	1565.82	8.60841	1580.58	5.66329	1600.32	6.35674	1600.32	6.35674	97.8442
56	267.082	108529	1.91859	9.98233	0.756559	3.85761	4.28848	0.279286	4.22122	0.984316	1587.76	59.4086	1604.86	34.5937	1627.35	14.0665	1627.35	14.0665	97.5673
50	235.796	88286.9	0.85281	9.94171	0.751432	4.02004	1.25349	0.289861	1.00329	0.800396	1640.84	14.5342	1638.26	10.1927	1634.93	13.9592	1634.93	13.9592	100.361
7	150.181	101094	1.40347	9.872	1.00074	4.0468	1.50225	0.289745	1.12039	0.745807	1640.25	16.2256	1643.65	12.2318	1647.99	18.558	1647.99	18.558	99.5304
77	248.43	261573	2.32244	9.82176	0.577276	3.91889	2.20159	0.279158	2.12456	0.965011	1587.12	29.8893	1617.59	17.8117	1657.45	10.6913	1657.45	10.6913	95.7569
13	141.262	8189.67	1.72946	9.79187	1.60661	4.0303	2.27375	0.286221	1.60896	0.707624	1622.62	23.0807	1640.33	18.4996	1663.09	29.7379	1663.09	29.7379	97.5663
53	237.203	124743	3.19476	9.5508	1.05783	4.35127	1.30897	0.301408	0.770974	0.588994	1698.29	11.5106	1703.14	10.8077	1709.09	19.4649	1709.09	19.4649	99.3677
14	414.753	392597	4.90784	9.36232	0.286145	4.55292	0.977836	0.309152	0.935032	0.956226	1736.53	14.234	1740.7	8.14093	1745.68	5.23979	1745.68	5.23979	99.4759
18	130.048	173069	1.65597	9.33598	1.26324	4.54121	1.66265	0.307489	1.08103	0.650187	1728.34	16.3889	1738.55	13.8364	1750.84	23.1239	1750.84	23.1239	98.7149
35	28.1712	14775.5	0.79513	9.06214	3.86857	4.99466	4.18316	0.328273	1.59154	0.380463	1830	25.3563	1818.42	35.404	1805.15	70.3641	1805.15	70.3641	101.377
5	74.0404	29337.4	1.12396	9.04313	1.62968	5.063	2.52291	0.332067	1.92593	0.763377	1848.39	30.95	1829.93	21.3952	1808.97	29.6179	1808.97	29.6179	102.179
78	178.744	111369	3.06686	9.0031	0.905543	5.09768	1.47176	0.332862	1.1602	0.788309	1852.24	18.678	1835.72	12.4939	1817.03	16.4405	1817.03	16.4405	101.938
17	32.0991	35695.7	0.997395	8.96759	2.56882	5.149	3.56654	0.334886	2.47415	0.69371	1862.02	40.0131	1844.23	30.3337	1824.2	46.6039	1824.2	46.6039	102.073
27	160.723	101988	1.88267	8.83143	0.950657	5.02513	1.27664	0.321868	0.85209	0.667448	1798.84	13.375	1823.57	10.8117	1851.91	17.1866	1851.91	17.1866	97.1347
73	91.6979	43712.6	1.90572	8.79617	2.12205	5.40411	3.01146	0.34476	2.13678	0.709547	1909.53	35.3145	1885.51	25.8087	1859.13	38.3344	1859.13	38.3344	102.711
15	164.37	142731	1.84208	8.75156	0.635535	5.23841	1.03575	0.332494	0.817843	0.789617	1850.46	13.1555	1858.89	8.83121	1868.31	11.4681	1868.31	11.4681	99.0443
100	217.022	176134	1.08807	8.69806	0.460969	5.46665	1.6532	0.34486	1.58763	0.960339	1910.01	26.2444	1895.37	14.1914	1879.37	8.30691	1879.37	8.30691	101.63
89	52.0156	39732.8	1.06665	8.64182	1.61162	5.70211	2.30452	0.357388	1.64726	0.714796	1969.78	27.9588	1931.69	19.9108	1891.05	29.0017	1891.05	29.0017	104.163
26	60.7865	32487.8	0.858917	8.59012	1.58127	5.56167	2.02027	0.3465	1.25741	0.622398	1917.86	20.859	1910.18	17.3889	1901.84	28.4166	1901.84	28.4166	100.842
32	162.363	10112.8	1.94489	8.52117	1.02632	5.66561	2.00415	0.350143	1.72141	0.858926	1935.28	28.7787	1926.14	17.2985	1916.31	18.412	1916.31	18.412	100.99
29	142.737	69518.6	2.03958	8.48503	0.43493	5.60026	0.931313	0.344636	0.823517	0.884253	1908.93	13.6065	1916.14	8.02383	1923.93	7.79415	1923.93	7.79415	99.2203
94	180.603	110529	0.666152	8.48215	0.508026	5.75565	1.28778	0.354078	1.18333	0.918897	1954.04	19.9472	1939.77	11.1408	1924.54	9.10376	1924.54	9.10376	101.533
31	72.3805	7783.04	0.865226	8.37952	2.23249	5.74722	2.62727	0.349281	1.38511	0.527206	1931.17	23.1141	1938.5	22.7269	1946.33	39.9128	1946.33	39.9128	99.221
64	264.995	242148	2.31669	8.37481	0.370364	5.80938	0.873588	0.352861	0.791193	0.905682	1948.24	13.3031	1947.81	7.56775	1947.33	6.62047	1947.33	6.62047	100.047
61	36.3959	10459.4	1.39331	8.35161	4.90687	5.86338	5.51895	0.355154	2.52616	0.457725	1959.16	42.679	1955.83	47.9092	1952.29	87.7068	1952.29	87.7068	100.352
90	41.4995	26522.8	0.989341	8.31832	2.2511	5.89365	3.14905	0.355564	2.20207	0.699279	1961.11	37.235	1960.3	27.3432	1959.42	40.1837	1959.42	40.1837	100.086
24	51.5485	63670.6	1.02493	8.23796	1.74245	6.11185	2.55162	0.365167	1.86403	0.730528	2006.62	32.1425	1991.94	22.2692	1976.73	31.0385	1976.73	31.0385	101.512
9	39.1854	23240.5	0.917512	8.17561	2.65941	6.11937	3.41941	0.362849	2.14939	0.628586	1995.66	36.8907	1993.01	29.8519	1990.25	47.3028	1990.25	47.3028	100.272
44	109.561	90741.7	1.52516	7.84445	0.758311	6.59977	1.02777	0.375483	0.693742	0.674997	2055.15	12.2082	2059.32	9.06288	2063.48	13.3722	2063.48	13.3722	99.5963
11	31.2524	53546.8	0.791679	7.82353	4.06068	6.66934	4.48203	0.378429	1.89722	0.423294	2068.94	33.5768	2068.57	39.5958	2068.19	71.6021	2068.19	71.6021	100.036
60	35.1485	29428.6	1.05302	6.60375	1.60663	9.10278	3.03604	0.435977	2.5761	0.848507	2332.61	50.4203	2348.39	27.783	2362.11	27.4267	2362.11	27.4267	98.7509
62	9.58033	7101.09	1.16136	6.53971	5.19017	8.95478	5.93998	0.424729	2.88885	0.48634	2281.91	55.518	2333.4	54.3065	2378.74	88.511	2378.74	88.511	95.9296
36	90.9528	72171.3	1.50356	6.04186	0.587137	10.7038	2.06379	0.469037	1.97851	0.958678	2479.34	40.7227	2497.75	19.1672	2512.75	9.86931	2512.75	9.86931	98.6703
52	34.6079	23423.5	1.38131	5.43789	1.393	12.9846	2.05716	0.512102	1.51376	0.735848	2665.6	33.0487	2678.53	19.3968	2688.3	23.0262	2688.3	23.0262	99.1556
49	87.5642	207617	4.3275	5.41326	0.71011	12.9671	1.32902	0.509097	1.1234	0.845288	2652.77	24.4309	2677.26	12.5291	2695.8	11.7279	2695.8	11.7279	98.4039
16	135.079	90826.3	1.97983	5.35049	0.336165	13.0059	1.09486	0.5047	1.04197	0.951697	2633.96	22.53	2680.08	10.3236	2715.05	5.5434	2715.05	5.5434	97.0135
97	26.8196	30761	1.91975	4.82917	0.938378	16.1951	1.98053	0.567224	1.74412	0.880632	2896.41	40.6933	2888.38	18.9426	2882.78	15.2371	2882.78	15.2371	100.473
57	142.337	162393	2.29627	4.76772	0.309889	16.4958	0.923649	0.570404	0.870113	0.942039	2909.48	20.3735	2905.99	8.84275	2903.55	5.02387	2903.55	5.02387	100.204
Rejected Analyses: >10% discordant; >5% rev discordant; >10% 2s err; grains <500 Ma-evaluated by 1s err concordance; 1200 Ma cutoff
30	1107.6	14573.4	2.1878	17.9916	1.18777	0.466857	1.91122	0.060919	1.49731	0.783436	381.212	5.54245	389.015	6.17648	435.665	26.4497	381.212	5.54245	NA
34	718.92	2767.24	1.22722	17.1958	5.98684	0.540506	6.14124	0.0674095	1.36842	0.222825	420.53	5.57095	438.758	21.8822	535.56	131.147	420.53	5.57095	78.5215
92	213.916	66069	8.68179	15.5134	3.06571	0.883201	3.41032	0.0993725	1.49388	0.438047	610.731	8.70473	642.71	16.2414	756.747	64.7185	610.731	8.70473	80.7047
99	339.327	131435	2.98572	14.5048	2.26378	1.5124	2.65667	0.159103	1.39041	0.523365	951.788	12.3032	935.41	16.2399	897.016	46.7061	951.788	12.3032	106.106
66	186.644	69636.5	7.17594	14.1364	3.16436	1.57924	3.22543	0.161914	0.624691	0.193677	967.406	5.6117	962.072	20.0554	949.895	64.7732	967.406	5.6117	101.844
21	22.0316	7457.3	2.30855	13.3305	7.82958	1.98918	8.59565	0.192318	3.54725	0.41268	1133.92	36.8844	1111.84	58.144	1068.95	157.589	1068.95	157.589	106.078
71	48.6904	16449.9	2.11436	13.2641	9.40393	2.02237	9.5033	0.194553	1.3707	0.144234	1145.99	14.3911	1123.06	64.6552	1078.95	189.11	1078.95	189.11	106.214
10	141.222	24225.4	2.82856	13.0845	1.63477	1.39549	4.16336	0.132429	3.82899	0.919686	801.706	28.8653	887.028	24.6316	1106.25	32.66	1106.25	32.66	72.4707
45	381.604	91881.4	3.54549	11.9586	4.43503	1.61265	8.35359	0.139869	7.07905	0.847426	843.919	55.9976	975.138	52.4019	1283.74	86.4175	1283.74	86.4175	65.7389
19	577.992	51866.1	2.15368	10.6373	0.416504	2.95825	2.64883	0.228225	2.61588	0.98756	1325.19	31.3346	1396.97	20.1035	1508.28	7.8665	1508.28	7.8665	87.8612
41	966.435	69386.5	7.96562	10.5487	0.479944	2.82397	2.35219	0.216051	2.3027	0.978962	1260.97	26.3732	1361.92	17.6397	1524.06	9.0442	1524.06	9.0442	82.7379
42	263.715	60615.9	0.899441	8.60329	0.425892	4.84003	2.86745	0.302003	2.83564	0.988908	1701.23	42.4009	1791.88	24.1346	1899.09	7.65679	1899.09	7.65679	89.5816
40	493.239	20123.4	10.6303	6.94968	2.17235	7.18795	2.61032	0.3623	1.4473	0.554452	1993.07	24.8127	2135.01	23.2718	2274.55	37.4321	2274.55	37.4321	87.6247
43	8.1588	1455.01	2.94493	6.03985	136.545	2.17721	137.55	0.0953729	16.5972	0.120663	587.235	93.1636	1173.79	1787.69	2513.31	464.097	2513.31	464.097	23.365
3	326.409	40041.3	2.99183	5.99679	0.519288	8.82904	3.04603	0.384	3.00144	0.985361	2094.94	53.685	2320.5	27.7891	2525.33	8.72053	2525.33	8.72053	82.9573
23	436.144	5845.82	2.08527	5.93818	1.02195	8.08337	11.3321	0.348133	11.286	0.995925	1925.68	187.928	2240.39	102.746	2541.81	17.1312	2541.81	17.1312	75.7601
2	188.229	45509.5	2.13966	5.76699	0.905435	5.13083	9.62668	0.214603	9.58401	0.995567	1253.29	109.171	1841.22	81.9817	2590.73	15.1052	2590.73	15.1052	48.3761
15BJ11, Clarence River Group, Buckland Hills Formation						(n=281/313)
315	568.702	49448.5	3.08241	15.3275	2.46867	0.587376	3.37253	0.065296	2.29774	0.681311	407.753	9.07896	469.19	12.672	782.134	51.881	407.753	9.07896	52.1334	1
172	715.479	406847	1.61418	17.7151	1.48803	0.509874	2.54912	0.0655096	2.06973	0.811938	409.046	8.20312	418.364	8.74083	470.051	32.9597	409.046	8.20312	87.0216	2
213	278.098	55754.4	1.18782	18.3048	1.71342	0.494444	2.92662	0.0656419	2.37262	0.810702	409.846	9.42141	407.935	9.83213	397.108	38.413	409.846	9.42141	103.208	3
33	349.813	287659	1.02696	17.1692	1.77981	0.527542	2.82535	0.0656909	2.19429	0.776642	410.142	8.71938	430.177	9.90786	538.929	38.9147	410.142	8.71938	76.1032	4
285	726.17	249682	3.1959	17.775	1.79295	0.510942	3.02376	0.065869	2.43484	0.805236	411.22	9.69987	419.083	10.3828	462.612	39.7407	411.22	9.69987	88.8908	5
300	283.499	124738	1.17077	17.2412	1.91841	0.527091	3.12302	0.0659101	2.46433	0.789088	411.468	9.82312	429.877	10.9456	529.802	42.0462	411.468	9.82312	77.6645	6
106	1032.65	380331	1.6546	17.9049	1.21701	0.509382	2.82704	0.0661477	2.55168	0.902597	412.905	10.2057	418.033	9.68768	446.412	27.0622	412.905	10.2057	92.4941	7
280	347.951	71712.3	1.22211	18.1746	1.72282	0.503952	2.77742	0.0664285	2.17853	0.784369	414.602	8.7479	414.374	9.45018	413.083	38.5159	414.602	8.7479	100.368	8
279	2012.8	61787.9	2.88382	15.7552	2.53132	0.583439	3.03961	0.0666681	1.68274	0.553604	416.051	6.77991	466.669	11.3726	724.033	53.6872	416.051	6.77991	57.463	9
157	103.97	69269.4	2.90406	17.5066	2.66972	0.526114	3.4951	0.0668006	2.25572	0.645396	416.851	9.10545	429.227	12.235	496.221	58.8587	416.851	9.10545	84.0052	10
12	171.253	235823	2.19648	17.4451	2.13425	0.528136	2.5769	0.0668216	1.44409	0.560399	416.978	5.83093	430.572	9.0432	503.954	46.9764	416.978	5.83093	82.7413	11
201	286.011	46198.7	1.42009	18.2752	2.33326	0.504529	3.42685	0.0668723	2.50982	0.732398	417.285	10.1413	414.763	11.6689	400.738	52.2575	417.285	10.1413	104.129	12
35	205.097	59447.4	2.6167	17.8729	1.91745	0.515938	2.72779	0.066879	1.94015	0.711256	417.325	7.84024	422.434	9.4269	450.395	42.5903	417.325	7.84024	92.6577	13
233	258.247	123371	1.95924	17.9472	1.65582	0.514292	2.52223	0.0669429	1.9026	0.754334	417.711	7.69538	421.331	8.69811	441.17	36.8363	417.711	7.69538	94.6827	14
130	201.086	67557	2.18598	17.8767	1.91838	0.517274	2.88114	0.0670667	2.14961	0.746095	418.459	8.70949	423.329	9.97391	449.917	42.6249	418.459	8.70949	93.008	15
236	98.2999	94134.9	2.82884	18.0495	1.82428	0.513185	2.74135	0.0671799	2.04622	0.746427	419.143	8.30371	420.589	9.44038	428.503	40.688	419.143	8.30371	97.8156	16
258	123.615	139636	1.75863	16.6562	2.28669	0.556333	2.96932	0.0672064	1.89418	0.637918	419.303	7.68958	449.137	10.7779	604.907	49.4523	419.303	7.68958	69.3169	17
239	107.848	116991	2.16641	17.9947	2.303	0.515273	3.00866	0.0672484	1.93603	0.643487	419.557	7.86408	421.989	10.3888	435.279	51.3025	419.557	7.86408	96.388	18
310	720.881	188997	2.14466	17.1255	1.6247	0.54171	2.98797	0.0672835	2.50765	0.83925	419.769	10.1909	439.551	10.6607	544.5	35.5295	419.769	10.1909	77.0926	19
254	93.853	50730.4	2.17684	18.07	2.4433	0.513476	3.25282	0.0672943	2.14736	0.660153	419.834	8.72805	420.784	11.2061	425.972	54.5039	419.834	8.72805	98.5589	20
284	107.391	59778.9	2.46811	18.1289	2.55661	0.512066	3.60175	0.067328	2.53701	0.704381	420.037	10.3166	419.837	12.3857	418.717	57.1255	420.037	10.3166	100.315	21
215	894.384	152871	1.64717	17.5795	1.52545	0.529302	2.75155	0.0674853	2.28999	0.832253	420.988	9.33253	431.346	9.6701	487.053	33.6689	420.988	9.33253	86.4357	22
176	200.493	144940	1.44726	17.624	1.84892	0.527987	2.76853	0.0674878	2.06064	0.744308	421.003	8.39813	430.473	9.71395	481.459	40.8483	421.003	8.39813	87.4431	23
290	250.124	58079.8	3.32889	17.8963	1.64453	0.519979	2.31805	0.0674912	1.63366	0.704757	421.023	6.65829	425.137	8.0521	447.487	36.5668	421.023	6.65829	94.086	24
14	939.624	119901	2.92247	17.0435	1.86885	0.546695	2.8565	0.0675778	2.16032	0.756283	421.546	8.81539	442.829	10.2523	554.973	40.7829	421.546	8.81539	75.9579	25
142	121.663	73853.9	2.65036	18.1203	2.12663	0.51443	3.15605	0.0676069	2.33197	0.738889	421.722	9.51966	421.423	10.886	419.768	47.5109	421.722	9.51966	100.465	26
147	106.241	27632.3	2.7334	17.8868	1.80594	0.521996	2.89333	0.0677172	2.26051	0.781286	422.388	9.24205	426.484	10.0762	448.66	40.1255	422.388	9.24205	94.1444	27
260	655.886	168657	1.45819	18.0033	1.59791	0.518826	2.52289	0.0677442	1.95235	0.773854	422.551	7.9851	424.367	8.75089	434.223	35.5919	422.551	7.9851	97.312	28
97	207.576	199674	2.39517	18.1105	1.70685	0.515839	3.19451	0.0677554	2.7003	0.845292	422.618	11.0459	422.368	11.0386	420.98	38.1282	422.618	11.0459	100.389	29
53	311.822	140130	1.39453	17.7868	1.62261	0.525285	2.31213	0.0677629	1.64715	0.712395	422.664	6.7386	428.676	8.0853	461.102	35.9941	422.664	6.7386	91.6638	30
270	69.4602	43056.4	2.69274	18.7479	2.66193	0.498626	3.21768	0.0677993	1.80763	0.561783	422.883	7.39885	410.772	10.871	343.268	60.23	422.883	7.39885	123.193	31
91	192.396	158651	2.52869	18.0939	2.4892	0.517082	3.00132	0.0678562	1.67685	0.558703	423.227	6.86893	423.2	10.3874	423.035	55.5567	423.227	6.86893	100.045	32
202	339.325	123925	2.18707	17.7461	1.61447	0.527242	2.6695	0.0678595	2.12596	0.79639	423.247	8.70905	429.978	9.35781	466.21	35.7824	423.247	8.70905	90.7845	33
211	194.847	38655.7	1.63135	18.1536	2.25732	0.515448	2.8612	0.0678652	1.75811	0.614468	423.281	7.20271	422.106	9.88178	415.671	50.4587	423.281	7.20271	101.831	34
244	569.97	152688	1.62004	17.8656	1.57979	0.524032	2.25921	0.0679007	1.61502	0.714861	423.496	6.61973	427.841	7.88786	451.294	35.0953	423.496	6.61973	93.8402	35
249	464.865	157756	1.77818	18.0125	1.45185	0.519785	2.5883	0.0679041	2.14276	0.827864	423.516	8.78326	425.008	8.98871	433.084	32.3578	423.516	8.78326	97.7909	36
188	78.7549	48379.7	2.52957	17.7643	2.8015	0.527869	3.66485	0.06801	2.36278	0.644715	424.156	9.6993	430.394	12.8573	463.928	62.1079	424.156	9.6993	91.427	37
89	463.027	186710	1.76302	17.6777	1.25306	0.530556	2.68853	0.0680232	2.37866	0.884744	424.235	9.76624	432.179	9.46324	474.728	27.7149	424.235	9.76624	89.3637	38
139	82.7007	49048.7	3.60009	17.6364	2.31488	0.531819	2.94148	0.0680256	1.81484	0.616983	424.249	7.45158	433.016	10.3697	479.899	51.1795	424.249	7.45158	88.404	39
199	1378.08	143831	3.62178	17.331	1.26235	0.541725	2.22567	0.068093	1.83306	0.823597	424.656	7.53334	439.562	7.94094	518.367	27.6996	424.656	7.53334	81.9219	40
13	284.321	108521	2.12101	17.7677	1.30198	0.528836	2.02439	0.0681478	1.55015	0.76574	424.987	6.37549	431.037	7.11034	463.522	28.8742	424.987	6.37549	91.6866	41
37	478.812	199826	1.63117	17.3168	2.09551	0.542949	2.89997	0.0681908	2.00466	0.69127	425.247	8.24968	440.367	10.3621	520.166	45.9989	425.247	8.24968	81.7521	42
197	105.282	32227	1.63674	18.0398	1.94284	0.521994	3.14433	0.068296	2.47229	0.786268	425.882	10.1888	426.483	10.9504	429.711	43.3092	425.882	10.1888	99.1088	43
241	357.467	137511	1.97497	18.0013	1.47168	0.523509	2.32118	0.0683484	1.79501	0.773317	426.198	7.40288	427.493	8.09893	434.462	32.7868	426.198	7.40288	98.0978	44
277	282.031	99183.3	2.69416	18.0131	1.75354	0.523575	2.78809	0.0684014	2.16761	0.777453	426.517	8.94603	427.537	9.72893	433.013	39.0823	426.517	8.94603	98.4999	45
125	363.527	182779	2.10597	17.7832	1.53858	0.530807	2.29233	0.0684614	1.69929	0.741292	426.879	7.01896	432.345	8.07111	461.55	34.1194	426.879	7.01896	92.4883	46
287	426.782	73796	1.14648	18.0631	1.99671	0.522611	3.09348	0.0684652	2.36278	0.763796	426.902	9.76004	426.894	10.7816	426.829	44.5545	426.902	9.76004	100.017	47
235	256.651	83514.8	2.87171	17.9693	2.26733	0.525473	3.06722	0.0684827	2.06569	0.673472	427.008	8.53486	428.801	10.7285	438.428	50.4706	427.008	8.53486	97.3951	48
115	50.3478	23893.4	4.15172	17.4749	2.64375	0.54039	3.34356	0.0684889	2.04693	0.612203	427.045	8.4581	438.682	11.9106	500.237	58.2256	427.045	8.4581	85.3686	49
203	184.363	88307.1	2.36816	18.14	1.61598	0.520623	2.53282	0.0684949	1.95032	0.770022	427.082	8.05956	425.568	8.80535	417.354	36.1003	427.082	8.05956	102.331	50
306	41.3638	28342.6	5.12274	18.1216	3.37257	0.521242	3.74727	0.068507	1.63334	0.435875	427.155	6.75077	425.981	13.038	419.613	75.3269	427.155	6.75077	101.797	51
75	279.893	54793.1	1.51602	16.7582	2.22028	0.563698	2.82658	0.0685128	1.74926	0.61886	427.189	7.23043	453.931	10.3467	591.737	48.1565	427.189	7.23043	72.1924	52
96	124.431	33907.7	2.45702	18.1545	2.3035	0.520657	3.49871	0.0685542	2.63342	0.752682	427.439	10.8912	425.59	12.1641	415.568	51.4926	427.439	10.8912	102.857	53
272	91.8314	78602.3	2.65557	17.8178	1.95503	0.5305	2.63912	0.068555	1.7728	0.67174	427.444	7.33198	432.141	9.28867	457.24	43.3947	427.444	7.33198	93.4835	54
60	86.528	47534.6	3.22619	18.1667	2.09938	0.520369	3.12949	0.0685625	2.32084	0.741603	427.489	9.59952	425.398	10.8763	414.058	46.9284	427.489	9.59952	103.244	55
9	189.344	94267.3	1.82693	17.4468	1.85572	0.541874	2.45807	0.0685667	1.61196	0.655781	427.515	6.66782	439.659	8.77171	503.746	40.8201	427.515	6.66782	84.8672	56
173	188.462	48757.2	2.01529	18.1182	1.72835	0.52181	2.60257	0.0685689	1.94581	0.74765	427.528	8.04904	426.36	9.06141	420.027	38.602	427.528	8.04904	101.786	57
29	182.223	73375.5	2.30446	18.0375	1.84028	0.524198	2.62153	0.0685756	1.86703	0.712191	427.569	7.72385	427.952	9.15483	429.993	41.0211	427.569	7.72385	99.4362	58
164	226.818	218316	2.7159	17.8838	1.98469	0.528709	3.06236	0.0685763	2.33217	0.761561	427.573	9.64825	430.952	10.7546	449.038	44.0987	427.573	9.64825	95.2198	59
73	241.036	212027	1.35415	17.6822	1.63854	0.535066	2.74597	0.0686186	2.20353	0.802458	427.828	9.12129	435.166	9.71895	474.208	36.2558	427.828	9.12129	90.2195	60
87	220.193	136156	1.48987	18.2453	2.02565	0.519032	3.19044	0.0686821	2.46488	0.772585	428.211	10.212	424.504	11.0694	404.404	45.3558	428.211	10.212	105.887	61
262	434.006	79557.3	2.30911	17.9958	1.5923	0.526288	2.67053	0.06869	2.1439	0.8028	428.259	8.88311	429.343	9.35032	435.147	35.4817	428.259	8.88311	98.4169	62
141	302.531	93315.1	1.30804	18.2852	1.70229	0.518304	2.62621	0.0687359	1.9998	0.761477	428.535	8.29121	424.018	9.10325	399.507	38.1471	428.535	8.29121	107.266	63
58	610.469	88101.1	1.86134	17.8449	1.61897	0.531145	2.95019	0.0687426	2.46629	0.835976	428.576	10.2262	432.57	10.3918	453.914	35.943	428.576	10.2262	94.418	64
31	105.206	29360.6	2.38467	18.0726	2.51964	0.524503	3.46741	0.0687492	2.38209	0.686994	428.615	9.87797	428.155	12.1137	425.659	56.2309	428.615	9.87797	100.695	65
195	821.681	103301	1.14955	17.9321	1.77051	0.5291	2.74043	0.0688124	2.0917	0.763277	428.997	8.68128	431.212	9.62859	443.041	39.398	428.997	8.68128	96.83	66
165	274.972	163685	2.15204	18.1294	1.64626	0.523565	2.67242	0.068842	2.10515	0.787733	429.175	8.74062	427.53	9.32516	418.648	36.7679	429.175	8.74062	102.515	67
62	488.158	779073	1.86261	17.908	1.18886	0.530251	2.60652	0.0688696	2.3196	0.889924	429.342	9.63461	431.976	9.17109	446.031	26.4471	429.342	9.63461	96.2583	68
79	313.534	205395	2.14104	17.6156	1.66737	0.539577	2.7437	0.0689366	2.17893	0.79416	429.746	9.05858	438.145	9.76407	482.546	36.8296	429.746	9.05858	89.0579	69
198	79.8165	30183.7	2.06249	18.6949	2.3568	0.508568	3.07109	0.0689557	1.96904	0.641152	429.861	8.1881	417.486	10.5129	349.658	53.2617	429.861	8.1881	122.937	70
267	692.237	210311	2.33302	17.9632	1.5967	0.529392	2.80297	0.06897	2.30373	0.821889	429.947	9.58173	431.406	9.85189	439.182	35.5447	429.947	9.58173	97.8972	71
28	436.79	203453	1.97351	17.6544	1.81625	0.538993	2.87962	0.0690137	2.2346	0.776006	430.21	9.29971	437.761	10.2406	477.645	40.1524	430.21	9.29971	90.0691	72
61	164.539	103972	1.38214	17.7545	1.7219	0.536127	2.82638	0.0690357	2.24131	0.792997	430.344	9.33043	435.867	10.0165	465.135	38.1682	430.344	9.33043	92.5201	73
250	142.608	55909.3	2.12633	18.3064	1.79892	0.520241	2.76302	0.0690725	2.09718	0.759018	430.566	8.73478	425.312	9.60104	396.918	40.3316	430.566	8.73478	108.477	74
263	56.7425	214830	2.04861	18.3416	2.52075	0.519399	3.26634	0.0690936	2.07722	0.635947	430.692	8.65412	424.75	11.3381	392.604	56.5415	430.692	8.65412	109.702	75
304	906.94	52125.3	1.15831	18.0573	1.75637	0.527628	3.06088	0.0691004	2.50682	0.818986	430.733	10.4449	430.235	10.735	427.542	39.1881	430.733	10.4449	100.746	76
93	491.062	134652	0.925087	18.2674	1.45272	0.52174	2.60627	0.069124	2.16385	0.830248	430.876	9.01874	426.313	9.07348	401.698	32.5418	430.876	9.01874	107.264	77
225	138.411	54486.3	2.73715	18.2009	2.55693	0.524218	3.51312	0.0691996	2.40917	0.685765	431.332	10.0515	427.965	12.269	409.858	57.189	431.332	10.0515	105.239	78
271	148.711	43725	2.81987	18.117	2.13874	0.527221	3.11557	0.0692752	2.26551	0.727159	431.787	9.46178	429.964	10.9213	420.182	47.7655	431.787	9.46178	102.762	79
2	167.698	64046	2.95907	17.7567	2.30851	0.538846	2.87879	0.0693947	1.71996	0.597458	432.508	7.1949	437.664	10.2359	464.874	51.1508	432.508	7.1949	93.0377	80
94	112.575	125392	2.00946	18.2889	2.43772	0.523287	3.20724	0.0694106	2.0842	0.649842	432.604	8.72044	427.345	11.1876	399.061	54.6551	432.604	8.72044	108.405	81
151	225.208	51082.7	3.20968	17.7113	1.86698	0.5405	2.72909	0.0694297	1.99056	0.729385	432.719	8.33079	438.754	9.72287	470.566	41.333	432.719	8.33079	91.9571	82
243	163.324	133368	2.91031	18.1903	2.29217	0.526414	3.42678	0.0694488	2.54731	0.743353	432.834	10.6636	429.427	12.0003	411.165	51.2853	432.834	10.6636	105.27	83
16	202.903	90535.6	2.06399	18.0873	1.44818	0.529472	2.20906	0.0694569	1.66815	0.755139	432.883	6.98401	431.459	7.76511	423.846	32.333	432.883	6.98401	102.132	84
98	198.382	46858.4	2.71725	17.8153	1.58383	0.537636	2.31196	0.0694674	1.68423	0.728488	432.946	7.05235	436.865	8.20831	457.594	35.1546	432.946	7.05235	94.6135	85
312	238.665	64238.3	2.18357	18.2823	1.7833	0.524043	2.63543	0.0694859	1.94045	0.736293	433.058	8.12723	427.849	9.20159	399.864	39.9601	433.058	8.12723	108.301	86
296	208.725	174622	2.38125	17.9085	1.54158	0.535413	2.52727	0.0695421	2.00265	0.792418	433.396	8.3941	435.396	8.94863	445.964	34.267	433.396	8.3941	97.1818	87
218	317.52	313327	3.42702	17.8096	1.23951	0.538486	2.5877	0.069555	2.27152	0.877814	433.474	9.52268	437.426	9.19679	458.259	27.5028	433.474	9.52268	94.5915	88
305	92.8475	40926	3.5159	17.1963	2.68121	0.557992	3.0836	0.0695925	1.52304	0.493917	433.7	6.38814	450.219	11.2142	535.485	58.6957	433.7	6.38814	80.992	89
177	560.783	28716.9	1.10541	14.7925	3.9457	0.648687	4.2919	0.0695947	1.68875	0.393474	433.713	7.0834	507.671	17.1482	856.35	81.9665	433.713	7.0834	50.6468	90
3	97.4248	55013.4	2.80706	18.0202	2.61003	0.532689	3.29555	0.0696197	2.01205	0.610537	433.864	8.44229	433.593	11.6304	432.131	58.176	433.864	8.44229	100.401	91
66	603.04	201327	1.63738	17.9607	1.47801	0.534799	2.6646	0.0696647	2.21711	0.832061	434.135	9.3083	434.99	9.42786	439.493	32.9116	434.135	9.3083	98.7808	92
152	186.784	86003.1	3.34872	18.1059	1.55037	0.530542	2.18442	0.0696686	1.53884	0.704464	434.159	6.46102	432.169	7.68862	421.555	34.6225	434.159	6.46102	102.99	93
56	350.514	351697	2.39527	17.9806	1.57206	0.534253	2.49977	0.0696707	1.94357	0.777499	434.171	8.16052	434.629	8.83874	437.031	35.0083	434.171	8.16052	99.3457	94
65	843.861	101169	1.71915	17.9971	1.70386	0.533803	2.53927	0.0696757	1.88275	0.741454	434.202	7.90571	434.33	8.97349	434.99	37.9486	434.202	7.90571	99.8188	95
190	141.902	177864	2.39884	17.8668	1.84905	0.538006	2.76212	0.0697159	2.0519	0.742871	434.444	8.6206	437.109	9.81102	451.15	41.0865	434.444	8.6206	96.2971	96
288	104.856	152597	1.93941	18.4729	2.27893	0.520532	3.18697	0.0697398	2.22784	0.699046	434.588	9.36278	425.507	11.0784	376.583	51.2782	434.588	9.36278	115.403	97
158	201.951	172089	2.48283	17.7515	1.87623	0.541798	2.60709	0.0697541	1.81016	0.694322	434.674	7.60889	439.609	9.30267	465.528	41.565	434.674	7.60889	93.3723	98
83	517.492	92519	2.39064	17.8752	1.55763	0.538116	2.38868	0.0697631	1.81096	0.758144	434.728	7.61317	437.182	8.48564	450.103	34.6191	434.728	7.61317	96.5842	99
224	1015.84	84184.3	1.74015	16.7357	1.70601	0.574844	2.61642	0.0697738	1.98373	0.758186	434.792	8.34069	461.142	9.69758	594.618	36.9844	434.792	8.34069	73.1213	100
289	253.836	43208.5	2.60249	17.8616	1.69665	0.538919	2.426	0.0698141	1.73403	0.71477	435.036	7.29475	437.711	8.62658	451.788	37.6924	435.036	7.29475	96.292	101
283	862.033	638459	2.2733	17.8509	1.59359	0.539288	2.89184	0.06982	2.41313	0.834464	435.071	10.1524	437.955	10.2877	453.124	35.3786	435.071	10.1524	96.0158	102
162	580.419	80667.9	1.95121	17.956	1.57123	0.536214	2.68525	0.0698306	2.17757	0.810936	435.135	9.16264	435.925	9.51731	440.081	34.9756	435.135	9.16264	98.8761	103
127	244.425	81588.3	1.61085	18.1034	2.09716	0.531851	3.02014	0.0698312	2.17329	0.719598	435.139	9.14471	433.037	10.6475	421.851	46.8328	435.139	9.14471	103.15	104
5	61.4129	42981.8	3.30754	14.3009	5.46931	0.674183	5.93442	0.0699263	2.30304	0.388082	435.712	9.70302	523.252	24.2698	926.149	112.401	435.712	9.70302	47.0455	105
117	542.658	55961.8	1.24695	17.9525	1.92296	0.537056	2.72954	0.0699268	1.93716	0.709702	435.715	8.16157	436.481	9.68416	440.505	42.8072	435.715	8.16157	98.9126	106
155	283.162	111288	1.95909	18.0147	1.3994	0.535423	2.02366	0.0699556	1.4618	0.722357	435.888	6.16118	435.403	7.16544	432.813	31.1918	435.888	6.16118	100.711	107
45	189.034	137244	2.762	18.3419	2.22138	0.525871	2.80537	0.0699557	1.71334	0.610736	435.889	7.22136	429.066	9.81735	392.565	49.8314	435.889	7.22136	111.036	108
222	282.773	90330.3	1.52584	18.1518	2.13543	0.531594	3.40668	0.069984	2.65432	0.779151	436.059	11.1916	432.867	12.0065	415.893	47.725	436.059	11.1916	104.849	109
180	196.904	86547	1.92037	18.4746	2.38827	0.522333	3.30754	0.0699877	2.28824	0.691824	436.082	9.64856	426.709	11.5237	376.369	53.7184	436.082	9.64856	115.866	110
231	258.791	65465.4	3.3367	18.1128	1.70105	0.532767	2.31667	0.0699878	1.5727	0.678863	436.082	6.63145	433.644	8.17645	420.694	37.979	436.082	6.63145	103.658	111
52	314.058	71817.5	1.71574	18.217	1.20157	0.530121	1.78935	0.0700406	1.32589	0.740991	436.4	5.59469	431.89	6.29477	407.883	26.8861	436.4	5.59469	106.992	112
32	285.004	169674	2.39509	18.1274	1.76817	0.533094	2.303	0.0700873	1.47559	0.640725	436.681	6.23021	433.861	8.13144	418.894	39.5	436.681	6.23021	104.246	113
153	449.683	30159.9	1.55761	15.8478	2.82718	0.609844	3.7164	0.0700951	2.41221	0.64907	436.728	10.1859	483.462	14.2961	711.584	60.0806	436.728	10.1859	61.3741	114
124	54.9414	59477.8	3.35557	17.9061	2.71694	0.539946	3.36088	0.0701213	1.97831	0.588629	436.887	8.3566	438.389	11.966	446.264	60.3965	436.887	8.3566	97.8986	115
193	129.382	31755.3	1.95446	17.6	2.4651	0.549465	3.34075	0.0701377	2.25475	0.674922	436.985	9.52638	444.646	12.0296	484.504	54.4367	436.985	9.52638	90.1923	116
276	252.002	106032	1.72958	18.2281	2.24109	0.530555	3.05525	0.0701408	2.07656	0.679668	437.004	8.77389	432.178	10.7541	406.514	50.1655	437.004	8.77389	107.5	117
154	209.331	166036	3.2315	17.816	2.22854	0.543052	3.33202	0.0701697	2.47709	0.743419	437.178	10.4702	440.435	11.9074	457.514	49.4408	437.178	10.4702	95.5551	118
134	266.776	413966	1.78869	18.1491	1.66682	0.534085	2.72896	0.0703015	2.16077	0.791792	437.972	9.14923	434.517	9.64718	416.225	37.264	437.972	9.14923	105.225	119
168	232.85	162706	3.05371	17.7948	1.57854	0.544773	2.57578	0.0703083	2.0354	0.790207	438.013	8.61917	441.567	9.22362	460.117	35.0239	438.013	8.61917	95.1959	120
92	99.3997	46433.9	3.11723	18.0211	3.08788	0.538449	3.54678	0.0703761	1.74489	0.491964	438.421	7.39562	437.401	12.6051	432.014	68.8261	438.421	7.39562	101.483	121
34	175.529	34943.3	2.58642	18.1037	1.56158	0.536035	2.85865	0.0703815	2.39444	0.837612	438.454	10.1495	435.807	10.1297	421.824	34.8689	438.454	10.1495	103.942	122
205	423.485	110765	1.81594	17.4453	1.54165	0.556519	2.42637	0.0704135	1.87366	0.772206	438.646	7.94534	449.258	8.80892	503.927	33.9344	438.646	7.94534	87.0456	123
221	57.4287	26338.1	2.27071	18.6044	2.80045	0.521923	3.64464	0.070424	2.33256	0.639998	438.71	9.89273	426.435	12.6917	360.597	63.1947	438.71	9.89273	121.662	124
55	358.062	72635.1	2.74068	18.0641	1.56753	0.537553	2.55664	0.0704264	2.01972	0.789989	438.724	8.5662	436.81	9.07618	426.711	34.9603	438.724	8.5662	102.815	125
109	425.821	47618.2	2.465	15.2334	2.40413	0.637549	2.96918	0.0704385	1.74247	0.586852	438.797	7.39149	500.787	11.7383	795.059	50.4398	438.797	7.39149	55.1904	126
294	217.704	58315.9	2.69151	17.9237	2.00014	0.541915	2.88056	0.0704461	2.07293	0.719629	438.843	8.7942	439.686	10.28	444.085	44.482	438.843	8.7942	98.8196	127
223	187.051	233186	2.3575	18.108	1.83993	0.536608	2.75786	0.0704735	2.05438	0.744917	439.007	8.71864	436.185	9.77935	421.292	41.0974	439.007	8.71864	104.205	128
186	136.964	66904.6	3.17971	18.1873	2.22162	0.534318	3.11383	0.0704802	2.18182	0.700686	439.048	9.2603	434.671	11.011	411.527	49.6827	439.048	9.2603	106.688	129
6	527.575	155060	2.08716	17.884	1.76374	0.543487	2.61884	0.0704941	1.93585	0.739203	439.132	8.21787	440.721	9.36348	449.01	39.1844	439.132	8.21787	97.8001	130
101	170.716	82782.5	2.07101	18.0683	1.93938	0.538298	2.64022	0.0705407	1.79153	0.678553	439.412	7.6099	437.302	9.38134	426.184	43.2597	439.412	7.6099	103.104	131
88	330.57	162471	1.85932	17.8042	1.49711	0.54631	2.83749	0.0705442	2.41039	0.849482	439.434	10.2391	442.577	10.1794	458.93	33.2166	439.434	10.2391	95.7518	132
175	114.41	61215.2	2.05806	17.5379	2.24674	0.554682	3.15434	0.0705536	2.21405	0.701906	439.49	9.40625	448.059	11.4277	492.302	49.5587	439.49	9.40625	89.2723	133
86	117.585	51047.7	2.47342	18.2014	2.03196	0.534576	2.94002	0.0705688	2.12481	0.722721	439.581	9.02895	434.842	10.3996	409.799	45.4672	439.581	9.02895	107.267	134
95	376.745	62044.6	2.30592	18.0212	1.73327	0.540351	2.62064	0.0706249	1.96558	0.750039	439.919	8.35853	438.656	9.33481	432.009	38.6435	439.919	8.35853	101.831	135
248	580.685	895284	1.23415	18.0009	1.42307	0.541266	2.57813	0.070665	2.14979	0.833858	440.161	9.14674	439.259	9.19348	434.515	31.7067	440.161	9.14674	101.3	136
116	284.316	62562.8	1.74205	17.871	2.0974	0.545763	3.0065	0.0707378	2.15406	0.716466	440.599	9.17369	442.217	10.7788	450.623	46.5991	440.599	9.17369	97.7757	137
159	686.48	223858	1.41102	17.7631	1.24674	0.549157	2.13474	0.0707479	1.73285	0.811737	440.66	7.38082	444.444	7.68394	464.077	27.6465	440.66	7.38082	94.9541	138
183	1034.42	36671.1	18.3137	14.268	4.69351	0.683753	5.25751	0.0707556	2.36903	0.450599	440.706	10.0916	529.04	21.6819	930.881	96.3735	440.706	10.0916	47.3429	139
156	97.2384	210814	2.30232	15.7027	2.92274	0.621579	3.48184	0.0707897	1.8923	0.543478	440.911	8.06445	490.837	13.5526	731.149	61.9188	440.911	8.06445	60.3039	140
150	203.016	239318	2.13055	15.7237	2.55652	0.620789	3.26894	0.0707939	2.03721	0.623201	440.937	8.68248	490.342	12.7139	728.323	54.1858	440.937	8.68248	60.5414	141
209	133.935	28395.5	2.90145	16.8727	2.69996	0.578992	3.66026	0.0708526	2.47138	0.675193	441.29	10.541	463.814	13.6289	576.955	58.714	441.29	10.541	76.486	142
179	1085.95	63616.9	1.04242	17.8437	1.41898	0.5482	2.75214	0.0709452	2.35813	0.856835	441.848	10.0703	443.817	9.89522	454.059	31.5012	441.848	10.0703	97.3107	143
138	827.97	149838	1.42548	18.048	1.50134	0.542089	3.10477	0.0709574	2.71764	0.875311	441.921	11.6074	439.801	11.0825	428.696	33.472	441.921	11.6074	103.085	144
68	956.874	38423	1.64371	15.165	3.36469	0.646022	3.9079	0.0710541	1.98759	0.508607	442.503	8.50006	506.028	15.5747	804.488	70.4682	442.503	8.50006	55.0043	145
50	122.297	45024.9	2.33099	18.4163	2.11599	0.532398	2.77712	0.071111	1.79861	0.647653	442.846	7.69765	433.4	9.79723	383.485	47.5353	442.846	7.69765	115.479	146
47	126.083	60359.5	2.18636	18.2972	2.15812	0.536465	3.20121	0.0711908	2.36437	0.738587	443.326	10.1296	436.091	11.3496	398.046	48.3729	443.326	10.1296	111.375	147
204	576.043	313290	1.18681	18.1199	1.10621	0.542005	1.9591	0.071229	1.61691	0.825331	443.556	6.93072	439.746	6.99217	419.829	24.7013	443.556	6.93072	105.651	148
146	344.349	196530	1.4735	18.1007	1.31172	0.542977	2.24613	0.0712814	1.82332	0.81176	443.871	7.82084	440.385	8.02593	422.185	29.2776	443.871	7.82084	105.136	149
256	307.328	69073.4	2.417	18.0663	1.35314	0.544587	2.20393	0.0713567	1.73963	0.789331	444.324	7.46923	441.444	7.89025	426.437	30.1928	444.324	7.46923	104.195	150
72	68.7675	29630.5	2.48027	18.4848	2.90371	0.533578	3.57854	0.071534	2.09151	0.584459	445.391	9.00088	434.181	12.643	375.124	65.3353	445.391	9.00088	118.731	151
42	228.234	59142.3	2.65408	18.0754	1.98344	0.545964	2.48437	0.0715733	1.49602	0.602171	445.627	6.44145	442.349	8.90886	425.309	44.2483	445.627	6.44145	104.777	152
82	171.924	58406.9	3.03054	18.2393	2.17373	0.541599	3.6838	0.071645	2.9741	0.807346	446.059	12.8177	439.479	13.1419	405.136	48.6874	446.059	12.8177	110.101	153
228	273.343	43393.3	3.42358	14.2254	3.88251	0.694854	4.36529	0.0716896	1.99546	0.457119	446.327	8.60495	535.712	18.174	937.042	79.6429	446.327	8.60495	47.6315	154
104	940.129	183165	1.47164	17.4878	1.4156	0.566708	2.33141	0.0718776	1.85244	0.794558	447.458	8.00774	455.883	8.56307	498.564	31.1924	447.458	8.00774	89.7493	155
11	415.295	126251	2.96564	17.8849	1.35156	0.55413	2.24577	0.0718783	1.79353	0.798629	447.462	7.75319	447.698	8.13071	448.894	30.0275	447.462	7.75319	99.681	156
100	579.213	89906.7	2.16694	17.7339	1.81489	0.559305	2.3519	0.0719367	1.49587	0.636027	447.813	6.47135	451.074	8.56599	467.707	40.2128	447.813	6.47135	95.7465	157
238	181.232	46711.3	3.25965	17.8299	2.10421	0.556464	2.92944	0.0719591	2.03811	0.695735	447.948	8.8197	449.222	10.6348	455.774	46.7105	447.948	8.8197	98.2828	158
313	243.365	46815.2	2.523	16.5734	1.74526	0.599832	2.55806	0.0721008	1.87022	0.73111	448.8	8.10804	477.127	9.73886	615.682	37.6856	448.8	8.10804	72.8948	159
232	367.879	195354	2.96211	17.6574	1.88547	0.563705	2.7368	0.07219	1.98371	0.724827	449.336	8.60995	453.935	10.0181	477.273	41.6853	449.336	8.60995	94.1465	160
171	253.552	136130	2.74	17.9593	1.61384	0.554346	2.6135	0.0722055	2.0557	0.78657	449.43	8.92424	447.84	9.46453	439.662	35.934	449.43	8.92424	102.222	161
274	362.246	88046.9	2.08687	18.1763	1.5397	0.547997	2.17766	0.0722409	1.53997	0.70717	449.643	6.68841	443.684	7.82773	412.875	34.4232	449.643	6.68841	108.905	162
298	135.756	59272.2	1.50037	18.1848	1.74093	0.548085	2.85128	0.0722861	2.25809	0.791956	449.914	9.81306	443.742	10.2503	411.839	38.9293	449.914	9.81306	109.245	163
208	237.261	245437	2.38725	18.0493	1.62801	0.552317	2.40834	0.0723015	1.77474	0.736914	450.007	7.71407	446.513	8.70094	428.532	36.3193	450.007	7.71407	105.011	164
43	218.778	37282.1	2.36271	14.4918	4.05358	0.688241	4.61149	0.0723373	2.1987	0.476787	450.222	9.56125	531.743	19.091	898.855	83.6488	450.222	9.56125	50.0884	165
295	296.805	132880	2.20112	18.0056	1.73229	0.554317	2.75388	0.0723875	2.1408	0.777375	450.523	9.31548	447.821	9.97257	433.942	38.5968	450.523	9.31548	103.821	166
167	79.4717	50686.3	3.01443	18.0063	2.68143	0.556736	3.68564	0.0727063	2.52861	0.686071	452.44	11.0482	449.4	13.3845	433.85	59.7511	452.44	11.0482	104.285	167
1	293.83	198111	2.01439	18.0519	1.65778	0.555567	2.85699	0.0727376	2.32684	0.814436	452.628	10.1707	448.637	10.361	428.208	36.9773	452.628	10.1707	105.703	168
108	611.009	140112	1.9967	17.755	1.10969	0.565734	2.34142	0.0728502	2.06176	0.880558	453.304	9.02501	455.252	8.59042	465.094	24.5849	453.304	9.02501	97.4652	169
49	166.97	27504.3	1.44436	12.4181	9.66417	0.809053	9.91565	0.072867	2.21898	0.223786	453.406	9.71532	601.923	45.0569	1209.95	190.675	453.406	9.71532	37.473	170
219	108.011	57558.1	2.67193	17.47	2.16203	0.575331	2.67755	0.0728971	1.57952	0.589912	453.586	6.91823	461.457	9.92949	500.846	47.6297	453.586	6.91823	90.564	171
122	150.31	150743	3.82713	17.7717	1.63758	0.56567	2.36247	0.0729106	1.70282	0.720781	453.667	7.45959	455.211	8.66702	463.033	36.3146	453.667	7.45959	97.9772	172
264	606.603	234259	1.80694	17.7561	1.46792	0.568723	2.17458	0.0732397	1.60437	0.737786	455.644	7.05787	457.188	8.00513	464.959	32.5296	455.644	7.05787	97.9967	173
308	139.413	117636	2.50246	17.7596	1.86486	0.568933	2.79485	0.0732813	2.0817	0.744835	455.894	9.16254	457.324	10.291	464.495	41.3276	455.894	9.16254	98.1484	174
15	244.619	117024	2.35138	17.5828	1.86436	0.574953	2.70657	0.0733195	1.96206	0.724924	456.124	8.64013	461.213	10.0329	486.621	41.1732	456.124	8.64013	93.7329	175
39	102.245	34486.1	2.92126	18.1093	2.23476	0.559927	3.45363	0.0735413	2.63313	0.762425	457.456	11.628	451.479	12.5879	421.129	49.9145	457.456	11.628	108.626	176
184	978.732	154693	1.11069	17.4461	1.39926	0.581418	2.62044	0.0735672	2.21557	0.845497	457.611	9.78723	465.372	9.7827	503.841	30.7902	457.611	9.78723	90.8245	177
111	351.195	54168.5	1.84475	17.9586	1.32375	0.565821	3.09853	0.0736971	2.80153	0.904149	458.391	12.396	455.308	11.3695	439.755	29.4709	458.391	12.396	104.238	178
286	399.103	55522.1	1.4011	17.732	1.16213	0.573364	2.61541	0.0737374	2.34303	0.895857	458.633	10.3726	460.188	9.67795	467.967	25.7459	458.633	10.3726	98.0054	179
46	501.89	179662	2.77306	18.1035	1.99178	0.561916	2.55689	0.0737789	1.60328	0.627043	458.882	7.1014	452.773	9.34044	421.848	44.4616	458.882	7.1014	108.779	180
70	90.9522	44633	3.06126	17.7499	2.05737	0.573215	3.04066	0.0737925	2.23894	0.736333	458.964	9.91864	460.092	11.2498	465.71	45.5993	458.964	9.91864	98.5515	181
110	152.566	37161.4	4.59939	17.8074	1.81078	0.572616	2.46758	0.0739541	1.67632	0.679337	459.934	7.44135	459.705	9.12334	458.562	40.1637	459.934	7.44135	100.299	182
90	559.396	54627	1.05542	17.4766	1.8044	0.584138	2.72617	0.0740408	2.04356	0.74961	460.455	9.0815	467.117	10.2075	500.018	39.759	460.455	9.0815	92.0875	183
99	898.049	93092.7	2.816	17.4924	1.70712	0.583753	2.56311	0.0740588	1.91188	0.74592	460.562	8.49819	466.87	9.59293	497.987	37.6085	460.562	8.49819	92.4848	184
44	88.9939	467678	2.72403	17.4076	2.50214	0.58686	3.47841	0.0740919	2.41633	0.694664	460.761	10.7449	468.86	13.0626	508.713	55.0035	460.761	10.7449	90.5738	185
192	451.804	187792	2.81422	17.8638	1.55175	0.572071	2.56807	0.0741178	2.04622	0.796794	460.916	9.1021	459.353	9.48913	451.518	34.4711	460.916	9.1021	102.081	186
149	240.434	26067.6	2.4492	15.0201	4.50221	0.681594	4.79416	0.07425	1.64746	0.343639	461.71	7.34049	527.737	19.7334	824.577	94.0089	461.71	7.34049	55.9936	187
200	403.834	84008.9	2.87156	17.5409	1.66585	0.586569	3.02213	0.0746226	2.52155	0.834362	463.945	11.2876	468.674	11.3454	491.924	36.7492	463.945	11.2876	94.3123	188
85	326.879	66588.7	3.558	17.7241	1.84667	0.581174	2.46213	0.0747085	1.62846	0.661405	464.461	7.29752	465.215	9.18921	468.942	40.9042	464.461	7.29752	99.0444	189
136	140.225	43746.6	2.14817	17.8915	1.9993	0.575943	2.76167	0.0747352	1.90516	0.689859	464.621	8.54033	461.851	10.2484	448.075	44.4386	464.621	8.54033	103.693	190
261	73.3549	52581.8	3.50095	16.33	4.20795	0.631118	4.68699	0.0747471	2.06423	0.440417	464.692	9.25476	496.792	18.4161	647.594	90.4086	464.692	9.25476	71.7567	191
10	116.962	112839	2.27352	17.5779	2.56656	0.586485	3.24612	0.0747691	1.98747	0.612261	464.824	8.91304	468.62	12.1853	487.238	56.6604	464.824	8.91304	95.3998	192
144	156.934	50275.9	2.68944	17.7064	1.67875	0.582247	2.56508	0.0747716	1.93945	0.756095	464.839	8.69794	465.904	9.58466	471.18	37.1628	464.839	8.69794	98.6543	193
23	301.025	147939	2.78535	18.0934	1.68725	0.570024	2.25005	0.0748019	1.48858	0.661578	465.021	6.67844	458.03	8.29502	423.087	37.655	465.021	6.67844	109.912	194
126	144.011	105678	3.1308	17.8136	1.67726	0.579082	2.32201	0.0748151	1.60579	0.691551	465.1	7.20548	463.871	8.6465	457.795	37.2285	465.1	7.20548	101.596	195
77	575.01	188141	0.782731	17.855	1.50706	0.579691	2.369	0.0750679	1.82782	0.771558	466.616	8.22753	464.263	8.82734	452.619	33.4738	466.616	8.22753	103.092	196
174	564.78	191174	1.90516	17.5329	1.66452	0.591047	3.54699	0.0751581	3.13217	0.88305	467.157	14.1145	471.536	13.3799	492.914	36.7163	467.157	14.1145	94.7745	197
71	37.3699	15100.7	5.09263	18.1497	2.7673	0.570973	3.3904	0.0751593	1.95879	0.577746	467.164	8.82706	458.643	12.5127	416.158	61.8318	467.164	8.82706	112.256	198
301	517.304	151999	1.62517	17.7444	1.90289	0.584263	2.7205	0.0751914	1.94426	0.71467	467.357	8.76507	467.197	10.1877	466.41	42.1552	467.357	8.76507	100.203	199
265	262.082	151499	2.88297	17.9269	2.01311	0.579279	3.11091	0.075317	2.37174	0.762395	468.109	10.7088	463.998	11.5868	443.68	44.7777	468.109	10.7088	105.506	200
118	84.8786	23163.9	3.10194	18.3366	2.62885	0.56829	3.35942	0.0755765	2.09161	0.622611	469.665	9.47427	456.908	12.3612	393.221	58.9732	469.665	9.47427	119.44	201
63	639.464	27705	1.63693	13.6837	5.60434	0.762944	5.93633	0.0757175	1.95737	0.329728	470.51	8.88158	575.707	26.0914	1016.14	113.626	470.51	8.88158	46.3037	202
80	65.8233	44137.4	2.44285	17.9109	3.0006	0.585171	3.82715	0.0760149	2.3756	0.620723	472.292	10.8186	467.779	14.3463	445.672	66.7327	472.292	10.8186	105.973	203
281	393.574	82833.1	1.75594	17.6349	1.34727	0.594642	2.31523	0.0760548	1.88285	0.813247	472.531	8.57879	473.828	8.7665	480.092	29.7831	472.531	8.57879	98.4251	204
8	170.612	87934.5	6.47717	18.0934	1.78497	0.580988	2.76999	0.0762403	2.1182	0.764694	473.642	9.67298	465.096	10.3362	423.098	39.8566	473.642	9.67298	111.946	205
297	272.931	202847	1.44504	18.116	1.66222	0.582139	2.55552	0.0764872	1.94106	0.759555	475.121	8.89071	465.835	9.54781	420.301	37.135	475.121	8.89071	113.043	206
114	217.362	241651	1.9156	17.5382	1.44871	0.601704	2.39975	0.0765359	1.91312	0.797217	475.413	8.76795	478.314	9.15394	492.272	31.9459	475.413	8.76795	96.5752	207
252	413.521	56392.4	2.23791	17.6773	1.66821	0.598351	2.85248	0.0767132	2.31381	0.811158	476.474	10.6272	476.187	10.8431	474.805	36.9122	476.474	10.6272	100.352	208
148	124.572	150819	2.916	17.814	1.9896	0.59381	2.97012	0.0767197	2.20525	0.742477	476.513	10.1293	473.298	11.2365	457.721	44.1577	476.513	10.1293	104.106	209
120	127.04	71673.5	2.00702	17.1346	2.17916	0.617399	3.22013	0.0767253	2.37076	0.73623	476.547	10.8903	488.216	12.4817	543.379	47.6582	476.547	10.8903	87.7006	210
135	236.949	74987.3	4.28859	17.5261	1.35707	0.604938	2.41603	0.0768944	1.99889	0.827344	477.559	9.20086	480.363	9.24691	493.767	29.9172	477.559	9.20086	96.7175	211
210	1168.6	284323	1.72258	17.8343	1.36595	0.594953	2.33336	0.0769553	1.89175	0.810744	477.924	8.71413	474.026	8.83806	455.201	30.3219	477.924	8.71413	104.992	212
112	433.616	77573.3	2.21796	17.4819	1.59726	0.610923	2.47516	0.0774595	1.89082	0.763917	480.941	8.76278	484.142	9.53143	499.305	35.1796	480.941	8.76278	96.322	213
113	1028.91	211260	0.861583	18.0626	1.51752	0.592296	2.79694	0.077592	2.34947	0.840014	481.734	10.9057	472.333	10.5644	426.896	33.8443	481.734	10.9057	112.846	214
229	300.883	115248	2.12274	16.9851	1.8719	0.635168	2.51056	0.078245	1.67299	0.66638	485.639	7.82619	499.31	9.9024	562.455	40.7884	485.639	7.82619	86.3426	215
133	177.711	68241.1	1.41273	17.6514	1.73834	0.616326	2.49585	0.078902	1.79092	0.717562	489.566	8.4431	487.542	9.66368	478.022	38.4277	489.566	8.4431	102.415	216
169	221.809	55512.7	2.18841	17.7035	1.69373	0.620232	2.48818	0.0796367	1.82273	0.732553	493.954	8.66713	489.993	9.67169	471.513	37.4832	493.954	8.66713	104.759	217
311	353.077	244672	1.56991	16.7576	1.78844	0.740282	3.0752	0.0899723	2.50166	0.813498	555.374	13.3119	562.57	13.2833	591.781	38.7893	555.374	13.3119	93.8478	218
292	299.867	75489.8	0.944105	16.8959	1.78049	0.735363	2.83282	0.0901117	2.20334	0.777791	556.198	11.7411	559.696	12.1894	573.936	38.7064	556.198	11.7411	96.9094	219
36	175.603	87076.2	1.1035	17.1868	1.71171	0.726056	2.53642	0.0905032	1.87176	0.737952	558.512	10.0139	554.236	10.8338	536.695	37.4606	558.512	10.0139	104.065	220
226	117.174	48189.3	1.29017	17.0564	2.0045	0.736515	2.77188	0.0911103	1.9145	0.690685	562.1	10.3056	560.37	11.9379	553.326	43.7433	562.1	10.3056	101.586	221
17	33.7815	63460.8	1.82926	16.6403	3.08008	0.761762	3.90062	0.0919346	2.39331	0.613572	566.969	12.9898	575.026	17.1268	606.979	66.6362	566.969	12.9898	93.4083	222
40	146.257	44787.6	1.24401	16.9709	1.96314	0.74728	2.79175	0.0919787	1.98494	0.711001	567.229	10.778	566.645	12.1241	564.28	42.7636	567.229	10.778	100.523	223
107	216.272	52874.5	1.21	17.2639	1.37621	0.743851	2.36196	0.0931372	1.91962	0.812721	574.064	10.5434	564.65	10.2304	526.925	30.1515	574.064	10.5434	108.946	224
291	135.884	47890	1.22017	17.2653	1.5745	0.756003	2.59494	0.0946668	2.06268	0.794886	583.078	11.4992	571.702	11.3442	526.74	34.5277	583.078	11.4992	110.696	225
69	111.505	241804	1.21102	16.7205	1.62565	0.823151	2.26937	0.0998223	1.58344	0.697745	613.367	9.26456	609.805	10.4042	596.572	35.2333	613.367	9.26456	102.815	226
166	706.954	56411.9	1.77677	16.4423	1.60833	0.840224	2.73069	0.100197	2.20679	0.808144	615.566	12.9559	619.269	12.6605	632.847	34.6347	615.566	12.9559	97.2693	227
59	269.582	486765	0.905832	16.3634	1.41415	0.876254	2.07171	0.103993	1.51399	0.730793	637.766	9.19345	638.957	9.8245	643.192	30.4196	637.766	9.19345	99.1563	228
129	407.916	169423	2.55908	16.1752	1.494	0.89355	2.68491	0.104826	2.23085	0.830885	642.627	13.6447	648.275	12.8655	667.972	31.964	642.627	13.6447	96.2056	229
26	284.174	230753	2.10877	13.8346	1.79151	1.58304	2.89548	0.15884	2.2747	0.785605	950.326	20.0993	963.567	18.0201	993.883	36.4194	950.326	20.0993	95.6176	230
132	434.289	120592	2.43805	13.7666	1.52931	1.68282	2.03227	0.168021	1.3384	0.658576	1001.2	12.4113	1002.05	12.9443	1003.89	31.0222	1001.2	12.4113	99.7313	231
194	67.8182	141495	6.20432	13.6071	2.06559	1.79576	3.1071	0.17722	2.32107	0.747023	1051.77	22.5249	1043.92	20.267	1027.51	41.7969	1051.77	22.5249	102.361	232
54	141.74	72431.7	1.35278	13.5619	1.54431	1.77557	2.44119	0.174646	1.89064	0.774475	1037.66	18.1209	1036.56	15.8581	1034.22	31.2199	1037.66	18.1209	100.332	233
131	141.767	164398	1.5609	13.5337	1.78439	1.8073	2.71756	0.177396	2.04966	0.754227	1052.73	19.9078	1048.1	17.7662	1038.44	36.0486	1052.73	19.9078	101.377	234
119	380.134	160233	1.0477	13.4326	1.41903	1.85748	2.15615	0.18096	1.62337	0.752902	1072.22	16.0356	1066.09	14.2324	1053.6	28.5939	1072.22	16.0356	101.767	235
309	88.5805	185129	3.61469	13.3186	1.6014	1.89221	2.46298	0.182779	1.87132	0.759776	1082.14	18.6418	1078.36	16.3632	1070.75	32.1969	1082.14	18.6418	101.063	236
227	119.646	120024	1.40553	13.2705	1.90508	1.83536	3.09876	0.176647	2.44396	0.788692	1048.63	23.6524	1058.2	20.3699	1077.98	38.2585	1048.63	23.6524	97.2773	237
253	104.695	113684	1.81239	13.2324	1.48354	1.93116	2.38332	0.185333	1.86529	0.782644	1096.05	18.8009	1091.94	15.945	1083.74	29.7333	1096.05	18.8009	101.135	238
67	356.718	329141	0.792125	13.1768	2.01051	1.98847	2.77654	0.190032	1.91496	0.689691	1121.55	19.7127	1111.6	18.7609	1092.18	40.2588	1121.55	19.7127	102.689	239
278	259.884	64577	3.0527	13.1753	1.56212	1.91525	2.54364	0.183014	2.00746	0.789208	1083.42	20.0198	1086.42	16.9698	1092.41	31.2691	1083.42	20.0198	99.1767	240
240	130.654	171750	1.55739	13.1119	1.84696	1.95721	3.21809	0.186124	2.63531	0.818905	1100.34	26.6579	1100.92	21.6297	1102.09	36.9306	1100.34	26.6579	99.8417	241
196	633.14	124594	38.3563	13.0785	1.25036	2.00003	2.27439	0.18971	1.89985	0.835325	1119.81	19.5294	1115.52	15.3971	1107.19	24.9849	1119.81	19.5294	101.139	242
206	130.377	91775.9	0.960366	12.9566	1.55584	2.06606	2.54546	0.194147	2.01463	0.79146	1143.8	21.1149	1137.63	17.4181	1125.85	30.989	1143.8	21.1149	101.594	243
27	610.988	127869	1.68155	12.7178	1.17984	2.08639	2.34362	0.192445	2.02498	0.864039	1134.6	21.0673	1144.34	16.0879	1162.82	23.3882	1134.6	21.0673	97.5736	244
76	243.807	167284	6.72709	12.7156	1.63248	2.11898	2.46762	0.195417	1.85045	0.749891	1150.65	19.5002	1155	17.024	1163.16	32.3393	1150.65	19.5002	98.9249	245
102	188.399	1.02585e+06	4.55618	12.6926	1.37474	2.11121	2.50797	0.194348	2.09762	0.83638	1144.89	22.0037	1152.47	17.2821	1166.75	27.247	1144.89	22.0037	98.1258	246
51	172.452	220522	6.80759	12.6181	1.24379	2.13022	1.84176	0.194947	1.35833	0.737517	1148.12	14.2854	1158.66	12.7273	1178.44	24.5978	1148.12	14.2854	97.4271	247
246	320.43	63198.4	1.76131	12.6082	1.44301	2.21254	1.97761	0.202323	1.35228	0.683795	1187.79	14.6693	1185.02	13.8306	1179.98	28.5493	1187.79	14.6693	100.661	248
25	301.084	177047	1.80016	12.4188	1.3033	2.24073	2.24569	0.201821	1.8288	0.814361	1185.1	19.7976	1193.89	15.7674	1209.83	25.6566	1185.1	19.7976	97.9558	249
299	143.57	76949.3	1.5668	12.2948	1.68195	2.17613	2.47677	0.194047	1.81809	0.734057	1143.26	19.0467	1173.44	17.2323	1229.57	33.0362	1143.26	19.0467	92.9807	250
282	301.288	169443	40.0979	12.0827	1.24278	2.39984	2.23847	0.210303	1.86178	0.831723	1230.43	20.8545	1242.55	16.045	1263.65	24.2726	1263.65	24.2726	97.371	251
20	126.389	175594	2.52638	11.9661	1.46472	2.54244	2.67231	0.220649	2.23514	0.836406	1285.3	26.0457	1284.27	19.4769	1282.53	28.5369	1282.53	28.5369	100.216	252
57	180.226	139606	2.64947	11.8988	1.43924	2.6248	2.27428	0.226516	1.76095	0.774289	1316.21	20.9648	1307.61	16.7234	1293.51	27.9968	1293.51	27.9968	101.755	253
234	214.299	54092.4	1.73227	11.8565	1.47339	2.73228	2.5484	0.234952	2.07929	0.815921	1360.4	25.5015	1337.28	18.9452	1300.43	28.6335	1300.43	28.6335	104.611	254
251	115.142	96505.2	1.70825	11.8006	1.23945	2.7418	2.40331	0.23466	2.05904	0.856752	1358.87	25.2276	1339.87	17.883	1309.61	24.0551	1309.61	24.0551	103.762	255
268	72.4321	60868.4	2.10443	11.7849	1.81138	2.72124	2.84198	0.232591	2.18992	0.770562	1348.06	26.6393	1334.27	21.1054	1312.19	35.144	1312.19	35.144	102.734	256
242	116.273	205681	1.76409	11.6895	1.51217	2.63141	3.14487	0.223091	2.75746	0.87681	1298.19	32.4231	1309.46	23.1431	1327.94	29.2737	1327.94	29.2737	97.7593	257
18	138.436	58612.6	2.15165	11.6397	1.6462	2.66728	2.58731	0.22517	1.99604	0.771474	1309.13	23.6485	1319.44	19.1097	1336.2	31.8317	1336.2	31.8317	97.9742	258
78	214.458	146041	3.09737	11.1688	1.57146	2.95083	2.44683	0.239029	1.8755	0.766502	1381.65	23.3242	1395.06	18.5583	1415.61	30.054	1415.61	30.054	97.6012	259
140	99.0009	91812.1	1.8095	11.1006	1.5629	3.14669	2.58248	0.253338	2.05586	0.796079	1455.67	26.7884	1444.19	19.901	1427.32	29.8428	1427.32	29.8428	101.986	260
269	162.322	1.56281e+06	1.56153	11.0251	1.64643	3.12271	3.28051	0.249696	2.83743	0.864936	1436.91	36.5474	1438.3	25.2354	1440.35	31.3827	1440.35	31.3827	99.7614	261
81	258.312	483471	5.89832	10.9802	1.40108	3.14406	2.45507	0.25038	2.01602	0.821166	1440.43	26.0239	1443.54	18.9151	1448.11	26.6776	1448.11	26.6776	99.4698	262
237	269.984	50705.7	4.81185	10.6385	1.43696	3.23469	2.53255	0.24958	2.08542	0.823446	1436.31	26.851	1465.51	19.6451	1508.07	27.1403	1508.07	27.1403	95.2416	263
24	755.261	2.17611e+06	3.73969	10.6369	1.21702	3.20494	2.23674	0.247248	1.87666	0.839017	1424.27	23.982	1458.35	17.312	1508.35	22.9849	1508.35	22.9849	94.4257	264
207	160.991	188887	8.96367	10.2513	1.41941	3.65081	2.58125	0.271436	2.15595	0.835236	1548.09	29.6711	1560.69	20.5769	1577.76	26.5636	1577.76	26.5636	98.1195	265
307	210.614	1.78049e+06	1.79231	10.037	1.3275	3.87392	2.29273	0.282003	1.86932	0.815326	1601.44	26.5075	1608.26	18.5056	1617.2	24.7162	1617.2	24.7162	99.0257	266
105	125.592	155456	1.21875	10.013	1.39503	3.66304	2.6588	0.266014	2.26343	0.851297	1520.54	30.6588	1563.35	21.2105	1621.65	25.9589	1621.65	25.9589	93.7652	267
230	159.768	160345	0.874013	9.89983	1.83207	4.00558	2.92254	0.287602	2.277	0.779119	1629.54	32.7866	1635.33	23.7509	1642.77	33.9988	1642.77	33.9988	99.1944	268
189	112.777	168835	1.1261	9.88712	1.37608	3.82211	2.51261	0.274076	2.10228	0.836694	1561.46	29.1534	1597.41	20.2245	1645.15	25.5272	1645.15	25.5272	94.9128	269
266	613.557	171882	5.14822	9.87109	1.49314	4.05063	2.59452	0.289992	2.1218	0.817804	1641.49	30.7487	1644.43	21.1313	1648.16	27.6901	1648.16	27.6901	99.5952	270
181	312.228	125078	2.72234	9.73925	1.5375	4.06942	2.74401	0.287446	2.27281	0.828282	1628.75	32.7125	1648.2	22.3697	1673.06	28.4224	1673.06	28.4224	97.352	271
41	140.704	55105.5	0.839904	9.63001	2.26358	4.0766	3.04508	0.284724	2.03684	0.668895	1615.11	29.0999	1649.63	24.8336	1693.88	41.7364	1693.88	41.7364	95.3496	272
302	239.77	109743	1.35158	9.42445	1.22566	4.46238	1.85867	0.305015	1.39729	0.751769	1716.13	21.053	1724	15.4188	1733.56	22.4845	1733.56	22.4845	98.9945	273
275	627.652	344827	4.20265	9.33741	1.41355	4.45576	2.50766	0.30175	2.07129	0.825986	1699.98	30.9516	1722.77	20.7982	1750.56	25.8768	1750.56	25.8768	97.1106	274
214	223.313	69052.1	1.28606	9.24376	1.19315	4.68225	1.96926	0.313908	1.56665	0.795552	1759.91	24.1284	1764.07	16.478	1768.99	21.7915	1768.99	21.7915	99.4864	275
121	145.124	1.67042e+06	0.800693	9.18184	1.50461	4.74455	2.16538	0.315954	1.55725	0.719157	1769.94	24.1025	1775.15	18.1614	1781.26	27.4394	1781.26	27.4394	99.3647	276
7	183.237	655622	3.31441	9.06259	1.53583	4.86259	2.51907	0.319609	1.99673	0.792647	1787.82	31.1756	1795.8	21.2183	1805.06	27.9251	1805.06	27.9251	99.0447	277
170	94.0087	971391	2.49711	8.77646	1.33809	5.42643	2.74678	0.345408	2.39882	0.873319	1912.63	39.7008	1889.04	23.5546	1863.18	24.1593	1863.18	24.1593	102.654	278
145	122.772	135869	2.29248	6.24177	1.3703	9.93902	2.4603	0.449935	2.04337	0.830537	2394.96	40.8765	2429.14	22.7016	2457.88	23.1653	2457.88	23.1653	97.4404	279
257	258.339	82750.5	0.927254	5.74371	1.57662	10.8558	2.60214	0.452224	2.07012	0.795547	2405.13	41.5566	2510.86	24.1977	2597.47	26.2888	2597.47	26.2888	92.5952	280
255	88.3315	203207	0.531589	5.61898	1.54943	11.6034	3.20526	0.472868	2.80589	0.875399	2496.13	58.0733	2572.94	29.9721	2634.01	25.7448	2634.01	25.7448	94.7651	281
																				282
Rejected Analyses: >10% discordant; >5% rev discordant; >10% 2s err; grains <500 Ma-evaluated by 1s err concordance; 1200 Ma cutoff																				283
303	2116.18	82050.4	0.778008	17.7114	1.58321	0.385214	2.9833	0.0494827	2.52854	0.847564	311.345	7.68539	330.868	8.42407	470.559	35.0644	311.345	7.68539	NA	284
103	2195.14	34639.5	1.82182	15.3957	2.5686	0.452376	3.48053	0.0505125	2.3487	0.67481	317.667	7.2802	378.942	11.0081	772.795	54.0638	317.667	7.2802	NA	285
220	1291.35	60337	1.3646	13.6475	3.57293	0.558562	4.76325	0.0552869	3.15004	0.661321	346.899	10.6386	450.59	17.335	1021.51	72.362	346.899	10.6386	NA	286
160	1814.38	30103.3	2.52398	14.9568	2.33838	0.516584	3.45031	0.0560376	2.53706	0.735312	351.483	8.67859	422.867	11.9339	833.382	48.7616	351.483	8.67859	NA	287
38	604.951	66536.2	1.47253	17.7124	2.36452	0.44662	5.19815	0.0573738	4.62923	0.890554	359.635	16.1925	374.91	16.2967	470.435	52.3415	359.635	16.1925	NA	288
163	2025.8	61121.1	1.72059	17.8033	1.58648	0.452156	2.16236	0.0583832	1.46932	0.679497	365.785	5.2249	378.788	6.8366	459.093	35.1986	365.785	5.2249	NA	289
216	891.521	56443.5	1.2855	15.8089	3.41418	0.514941	4.16872	0.0590414	2.39198	0.573793	369.793	8.59646	421.766	14.3887	716.816	72.5041	369.793	8.59646	NA	290
4	498.89	85075.8	1.47132	17.1308	1.7359	0.500053	3.06998	0.0621289	2.53208	0.824788	388.559	9.54799	411.738	10.3918	543.856	37.9414	388.559	9.54799	NA	291
22	1746.13	137103	1.45686	16.4192	1.91212	0.522485	2.61426	0.0622194	1.78273	0.681925	389.109	6.73155	426.81	9.10984	635.871	41.1691	389.109	6.73155	NA	292
182	227.569	29697.6	1.90276	14.5912	5.28572	0.597589	5.97983	0.0632403	2.79635	0.46763	395.301	10.7219	475.703	22.7158	884.744	109.361	395.301	10.7219	NA	293
128	155.268	26851.1	1.61709	16.5777	1.90598	0.724317	2.97327	0.0870865	2.28201	0.767508	538.283	11.7848	553.212	12.6823	615.129	41.1662	538.283	11.7848	87.5073	294
21	109.197	35732.2	0.822259	15.8881	2.37181	0.7953	2.99185	0.0916437	1.82365	0.60954	565.251	9.86922	594.174	13.4583	706.226	50.458	565.251	9.86922	80.0382	295
74	334.36	73387.2	7.67596	13.0741	1.30198	1.67122	2.53605	0.158469	2.17632	0.858157	948.265	19.1913	997.649	16.1119	1107.82	26.0077	948.265	19.1913	85.5973	296
247	291.741	184199	5.54283	11.4	3.71209	2.53941	4.3069	0.209959	2.18397	0.507087	1228.6	24.4304	1283.4	31.3859	1376.33	71.3983	1376.33	71.3983	89.2662	297
161	320.766	32313	5.07632	11.1501	11.0851	0.875895	11.2793	0.0708317	2.08404	0.184767	441.164	8.8865	638.763	53.525	1418.83	212.548	1418.83	212.548	31.0936	298
64	980.309	18577.4	1.59249	10.715	10.2997	0.921634	10.5365	0.0716223	2.22122	0.210811	445.922	9.57011	663.224	51.3553	1494.52	195.4	1494.52	195.4	29.8371	299
217	154.989	12328.6	1.97198	9.40043	11.0662	1.5726	12.2877	0.107217	5.34098	0.434662	656.568	33.3407	959.454	76.4125	1738.24	203.519	1738.24	203.519	37.772	300
48	215.375	15509.6	2.03473	8.52104	18.6615	1.21787	18.757	0.075265	1.89086	0.100808	467.798	8.53208	808.802	104.955	1916.34	337.872	1916.34	337.872	24.411	301
293	384.333	12095.2	3.97178	8.39083	14.373	1.34135	14.5665	0.0816292	2.36669	0.162474	505.84	11.514	863.814	84.9323	1943.92	258.403	1943.92	258.403	26.0217	302
30	139.678	18470.3	2.53815	8.13138	15.0924	1.23724	15.4568	0.0729656	3.33647	0.215858	453.998	14.6264	817.632	87.0066	1999.9	269.728	1999.9	269.728	22.7011	303
19	456.858	18694.1	0.84795	8.10287	15.5119	1.11691	16.0071	0.0656378	3.95047	0.246795	409.821	15.686	761.492	85.9593	2006.13	277.124	2006.13	277.124	20.4285	304
178	113.972	9799.08	2.21071	8.07143	20.554	1.28118	20.8082	0.0749997	3.24276	0.155841	466.207	14.5843	837.38	119.208	2013.03	368.72	2013.03	368.72	23.1595	305
187	331.251	10525.3	2.64061	7.9331	20.94	1.34561	21.0554	0.0774214	2.20154	0.104559	480.713	10.1981	865.661	123.249	2043.63	374.499	2043.63	374.499	23.5225	306
143	536.469	14004.5	3.27641	7.50984	15.1316	1.36041	15.4253	0.0740968	2.99562	0.194202	460.791	13.3217	872.048	90.5092	2140.02	266.187	2140.02	266.187	21.5321	307
123	259.093	19051.9	0.987799	7.4375	19.5791	1.42755	21.6285	0.0770048	9.18964	0.424887	478.22	42.3568	900.527	129.849	2156.92	345.237	2156.92	345.237	22.1714	308
245	648.7	10632	2.06916	7.34167	23.3583	1.45596	23.4154	0.077525	1.63392	0.0697797	481.333	7.57813	912.338	141.864	2179.53	412.719	2179.53	412.719	22.0842	309
137	256.133	93811.1	0.68251	5.57463	1.77549	10.2502	2.80907	0.414427	2.17681	0.774922	2235.13	41.1162	2457.62	25.9932	2647.17	29.465	2647.17	29.465	84.4348	310
191	331.57	6225.05	2.75998	5.20295	32.8643	1.79994	33.0538	0.0679215	3.53434	0.106927	423.621	14.4909	1045.44	219.093	2761.06	556.919	2761.06	556.919	15.3427	311
273	55.6054	6861.27	0.54089	4.70587	16.2967	10.7058	16.8325	0.365389	4.21283	0.25028	2007.67	72.6792	2497.92	157.566	2924.7	265.675	2924.7	265.675	68.6452	312
185	62.2792	9249.39	2.84176	4.45358	33.4933	3.03825	33.995	0.0981367	5.8189	0.171169	603.48	33.5226	1417.28	265.598	3013.51	556.095	3013.51	556.095	20.0258	313
212	405.005	5272.47	3.42125	3.37223	7.93521	11.1898	9.95524	0.273676	6.01159	0.603862	1559.44	83.2741	2539.07	93.0509	3452.24	123.307	3452.24	123.307	45.1718	314
314	217.489	2604.47	2.10162	2.87734	7.34917	5.31219	8.45624	0.110857	4.18302	0.494667	677.724	26.9102	1870.83	72.3828	3696.26	112.224	3696.26	112.224	18.3354	315
14BJ26, Clarence River Group, Buckland Hills Formation						(n=38/48)
4	1226.6	70666.3	1.84808	17.9314	1.65045	0.498206	5.1099	0.0647918	4.83602	0.946402	404.701	18.9698	410.487	17.2552	443.131	36.7049	404.701	18.9698	91.3277
22	691.123	55411.3	4.11646	17.3776	1.69708	0.530968	3.07957	0.0669202	2.56976	0.834454	417.574	10.3905	432.452	10.8452	512.505	37.3002	417.574	10.3905	81.477
33	458.479	81154.7	2.82106	17.665	2.25039	0.522658	4.98752	0.066962	4.45097	0.892421	417.827	18.0075	426.925	17.3849	476.345	49.7844	417.827	18.0075	87.7151
12	1324.38	210315	2.38032	18.102	1.64042	0.513651	2.77618	0.0674361	2.23968	0.80675	420.69	9.12126	420.901	9.56604	422.035	36.6236	420.69	9.12126	99.6813
44	156.151	15307.3	2.38195	16.9891	2.79959	0.551332	5.52196	0.0679332	4.75966	0.861951	423.692	19.5179	445.869	19.9291	561.949	61.0032	423.692	19.5179	75.3968
34	303.389	90737.1	4.59915	17.449	2.80249	0.54888	3.69733	0.069462	2.4117	0.652281	432.913	10.0977	444.263	13.3046	503.477	61.6885	432.913	10.0977	85.9848
15	549.549	35086.7	4.17795	17.8563	1.89202	0.539951	2.82519	0.0699269	2.09809	0.742635	435.715	8.83959	438.393	10.0587	452.456	42.0175	435.715	8.83959	96.2999
48	814.219	523567	2.84984	17.8963	1.31228	0.541975	2.57839	0.0703465	2.21947	0.860794	438.243	9.4034	439.726	9.20223	447.477	29.1734	438.243	9.4034	97.9363
36	451.26	44113.1	1.71615	18.133	2.08317	0.536956	3.0854	0.0706168	2.27599	0.737663	439.871	9.67749	436.416	10.9455	418.205	46.5499	439.871	9.67749	105.181
39	875.08	84811.1	2.54605	17.9349	1.38308	0.544486	2.46163	0.0708245	2.03634	0.827235	441.121	8.6823	441.378	8.81181	442.693	30.77	441.121	8.6823	99.645
13	811.017	86384.6	1.49868	17.5041	1.45586	0.560895	3.34279	0.0712064	3.00911	0.900178	443.42	12.8944	452.109	12.1974	496.518	32.0927	443.42	12.8944	89.3058
2	590.179	80705.1	1.61983	17.2079	2.07568	0.576249	3.93141	0.0719179	3.3388	0.849261	447.7	14.4406	462.048	14.5947	534.01	45.4528	447.7	14.4406	83.8374
43	1226.65	100977	3.02565	17.4036	1.74049	0.570606	3.25296	0.0720234	2.74817	0.844822	448.334	11.9023	458.406	12.0004	509.212	38.2483	448.334	11.9023	88.0447
47	268.24	25117.5	3.84018	17.2831	1.34782	0.582019	3.40223	0.0729553	3.12387	0.918183	453.936	13.6926	465.758	12.7099	524.447	29.5513	453.936	13.6926	86.5551
37	83.6147	8954.79	3.65789	17.9408	2.46685	0.561215	3.35096	0.0730247	2.26794	0.676803	454.353	9.9497	452.317	12.2317	441.961	54.8979	454.353	9.9497	102.804
3	170.764	44787.6	3.53372	17.2602	2.41692	0.588719	2.89312	0.0736974	1.59016	0.549636	458.393	7.03607	470.049	10.8861	527.394	52.9752	458.393	7.03607	86.9165
26	295.26	25222.8	5.15305	17.4834	1.82321	0.584421	3.12131	0.0741055	2.53348	0.811671	460.843	11.2678	467.299	11.6907	499.12	40.1581	460.843	11.2678	92.331
29	136.325	36818.8	4.46919	17.3785	2.63489	0.588325	3.63433	0.074153	2.50314	0.688749	461.128	11.1395	469.797	13.6697	512.358	57.9158	461.128	11.1395	90.001
32	1163.82	232987	2.64891	17.458	1.5406	0.590322	2.68116	0.0747448	2.19435	0.818434	464.678	9.83786	471.073	10.1058	502.35	33.9161	464.678	9.83786	92.5009
18	181.104	43864.1	2.93214	17.161	2.3595	0.601206	4.36693	0.074828	3.67463	0.841466	465.178	16.4914	477.999	16.6503	540.016	51.5993	465.178	16.4914	86.1415
14	611.916	42445.8	3.40326	17.6524	1.73597	0.587494	2.36457	0.0752154	1.60548	0.678976	467.501	7.23995	469.266	8.88554	477.889	38.3761	467.501	7.23995	97.8262
11	431.868	50307.1	2.57974	17.1815	2.15337	0.605584	3.76247	0.0754631	3.08532	0.820025	468.985	13.9559	480.771	14.4103	537.398	47.133	468.985	13.9559	87.2697
30	492.12	47572.6	4.00306	17.5238	2.14573	0.59617	4.15894	0.0757702	3.56267	0.85663	470.826	16.1761	474.8	15.7739	494.071	47.3248	470.826	16.1761	95.2951
24	510.244	57982	2.68544	17.3813	1.62668	0.602876	2.54421	0.0759993	1.95625	0.768904	472.199	8.90719	479.057	9.71681	512.008	35.7537	472.199	8.90719	92.2249
9	348.789	99907	2.68991	17.0744	2.12455	0.618735	2.6218	0.0766212	1.53627	0.585959	475.923	7.04809	489.054	10.1759	551.044	46.3856	475.923	7.04809	86.3676
50	407.176	28614.7	1.58783	17.232	1.5695	0.646538	2.58652	0.0808034	2.05591	0.794854	500.916	9.90844	506.346	10.313	530.971	34.3727	500.916	9.90844	94.3397
21	116.081	15154.7	1.79364	17.1013	2.73225	0.730741	4.05321	0.0906338	2.99388	0.738645	559.284	16.0386	556.988	17.3781	547.593	59.6782	559.284	16.0386	102.135
23	37.205	12163.1	2.26179	15.9311	3.80735	0.8532	5.37636	0.0985816	3.79596	0.706048	606.091	21.9586	626.404	25.1383	700.433	81.0983	606.091	21.9586	86.5309
28	176.096	80413.5	1.87338	15.789	1.51026	0.933287	2.39077	0.106873	1.85335	0.77521	654.562	11.5358	669.363	11.7194	719.487	32.0479	654.562	11.5358	90.9762
1	921.825	83730.4	381.525	13.544	1.14103	1.73747	2.11668	0.170673	1.78281	0.842265	1015.82	16.7553	1022.53	13.642	1036.9	23.0632	1015.82	16.7553	97.9672
40	40.7023	33696.8	2.26066	12.6722	2.63562	2.09209	3.58515	0.19228	2.43039	0.677904	1133.71	25.2669	1146.21	24.6349	1169.92	52.1758	1133.71	25.2669	96.9049
20	369.774	197729	2.81564	10.9887	1.59245	3.17366	4.49881	0.252934	4.20754	0.935256	1453.59	54.7566	1450.77	34.7488	1446.63	30.328	1446.63	30.328	100.481
5	1528.75	75938.6	3.39374	10.9014	1.95807	2.85213	3.34191	0.225501	2.7082	0.810374	1310.88	32.1246	1369.37	25.1294	1461.82	37.216	1461.82	37.216	89.6745
46	393.952	103724	1.77471	10.5322	1.53211	3.29396	5.8725	0.251614	5.66912	0.965367	1446.79	73.4712	1479.63	45.7728	1527.01	28.8651	1527.01	28.8651	94.747
6	337.268	95919.9	2.06085	10.4457	1.15196	3.7433	2.12224	0.28359	1.78239	0.83986	1609.42	25.3856	1580.68	17.0075	1542.52	21.6592	1542.52	21.6592	104.337
25	1485.87	80814.4	1.62626	9.98717	1.06738	3.47394	2.1281	0.251631	1.84106	0.865119	1446.88	23.8603	1521.32	16.7801	1626.45	19.8489	1626.45	19.8489	88.9593
38	40.4677	28343.7	5.48912	9.26391	1.80989	4.52983	3.28128	0.304351	2.73698	0.834121	1712.85	41.1696	1736.46	27.2991	1765.02	33.0727	1765.02	33.0727	97.0444
49	163.101	131434	1.63688	9.12122	2.22916	4.70612	3.77828	0.311326	3.05062	0.807409	1747.23	46.6893	1768.33	31.651	1793.33	40.5944	1793.33	40.5944	97.4293
Rejected Analyses: >10% discordant; >5% rev discordant; >10% 2s err; grains <500 Ma-evaluated by 1s err concordance; 1200 Ma cutoff
10	3299.62	103805	2.2831	16.7618	1.52974	0.386532	2.43902	0.04699	1.89966	0.778863	296.015	5.49614	331.833	6.90412	591.226	33.1636	296.015	5.49614	NA
8	1070.3	98982.2	2.16969	16.5947	1.8016	0.421427	4.48586	0.0507212	4.10818	0.915807	318.948	12.7841	357.071	13.5051	612.915	38.933	318.948	12.7841	NA
17	3168.68	103001	2.32651	17.3073	2.17054	0.418141	3.04555	0.0524868	2.13638	0.701478	329.771	6.86801	354.721	9.11823	521.38	47.6273	329.771	6.86801	NA
41	704.863	47373.3	1.58153	15.8206	2.01388	0.625439	2.95368	0.0717641	2.16068	0.731521	446.775	9.32645	493.25	11.5405	715.242	42.7726	446.775	9.32645	62.4648
19	2556.99	118483	5.53269	16.84	5.06542	0.619163	7.45239	0.0756214	5.46622	0.733486	469.934	24.7738	489.323	28.9439	581.168	110.071	469.934	24.7738	80.8602
42	636.907	119586	1.57558	15.9208	1.56208	0.669298	2.492	0.0772827	1.94164	0.779149	479.883	8.97925	520.285	10.1456	701.859	33.2654	479.883	8.97925	68.3732
7	2411.16	126927	5.04181	12.5174	1.27245	1.49493	5.32051	0.135717	5.16611	0.97098	820.397	39.7971	928.326	32.3812	1194.23	25.1135	1194.23	25.1135	68.6965
35	692.873	144907	4.60825	10.5391	1.49397	2.25514	4.3277	0.172375	4.06165	0.938525	1025.18	38.4977	1198.39	30.4524	1525.77	28.151	1525.77	28.151	67.1911
27	231.027	35707	2.36543	10.3851	1.33491	2.20029	4.53609	0.165725	4.33522	0.955717	988.515	39.7308	1181.13	31.6769	1553.45	25.0616	1553.45	25.0616	63.6334
45	535.561	43748	0.726617	6.64437	1.16472	2.55982	5.91153	0.123356	5.79566	0.980398	749.854	41.0271	1289.24	43.189	2351.64	19.9053	2351.64	19.9053	31.8865
14BJ29, Clarence River Group, Buckland Hills Formation						(n=101/109)
73	295.811	57554.9	1.97799	18.245	1.84459	0.493213	3.19072	0.0652644	2.6035	0.815959	407.562	10.2824	407.098	10.7016	404.446	41.3008	407.562	10.2824	100.77
108	519.85	55489.3	3.01281	18.2253	1.82617	0.508052	3.01571	0.0671556	2.39992	0.795806	418.997	9.73577	417.138	10.3164	406.852	40.8712	418.997	9.73577	102.985
79	846.15	342612	3.5539	18.0588	1.33503	0.514333	2.19192	0.0673646	1.73844	0.793115	420.259	7.0729	421.359	7.55936	427.362	29.771	420.259	7.0729	98.3377
50	134.238	16222.1	8.02967	17.9724	1.62696	0.517514	2.4974	0.0674568	1.89473	0.758681	420.816	7.71864	423.489	8.64804	438.05	36.2148	420.816	7.71864	96.0657
83	211.766	86303.1	2.16374	17.9933	1.74369	0.518405	3.43167	0.0676517	2.95565	0.861288	421.992	12.0732	424.085	11.897	435.459	38.8407	421.992	12.0732	96.9076
60	179.206	19385.3	3.36976	17.4563	1.95072	0.535324	3.68072	0.0677748	3.12128	0.848008	422.736	12.7715	435.337	13.0318	502.534	42.9354	422.736	12.7715	84.1208
47	414.576	72780.5	1.12811	17.8902	1.87749	0.525619	3.60356	0.0681999	3.07582	0.85355	425.301	12.6593	428.898	12.6069	448.245	41.7205	425.301	12.6593	94.8815
6	145.744	91649.2	1.90996	18.0737	2.0636	0.521013	3.15464	0.0682958	2.38607	0.756366	425.88	9.8334	425.828	10.9727	425.522	46.0435	425.88	9.8334	100.084
102	2161.16	94774	1.07718	17.96	1.1257	0.524845	1.84845	0.0683654	1.46614	0.793173	426.3	6.048	428.383	6.46026	439.579	25.0714	426.3	6.048	96.9793
109	558.841	77886.2	2.40863	18.0649	1.44083	0.522596	2.35375	0.0684701	1.86123	0.79075	426.932	7.68877	426.884	8.20316	426.602	32.1355	426.932	7.68877	100.077
81	1301.32	114796	1.39781	17.9596	1.7448	0.525831	2.73494	0.0684922	2.10608	0.770065	427.065	8.70289	429.039	9.57041	439.633	38.8268	427.065	8.70289	97.1413
74	69.8686	12833.4	4.56177	18.1299	1.93594	0.520923	2.48914	0.0684963	1.5646	0.628571	427.09	6.46571	425.768	8.65678	418.596	43.2394	427.09	6.46571	102.029
41	587.99	100411	2.53	18.1191	1.47909	0.52195	4.02319	0.0685904	3.74144	0.929968	427.658	15.4814	426.453	14.0106	419.924	33.0264	427.658	15.4814	101.842
25	134.656	53288.6	4.95996	17.9271	2.69421	0.52936	3.17803	0.0688273	1.68557	0.530381	429.087	6.99709	431.385	11.1698	443.656	59.9178	429.087	6.99709	96.716
21	516.923	105385	5.73662	18.2544	1.38101	0.520013	2.07466	0.0688461	1.54823	0.746258	429.2	6.42863	425.16	7.20695	403.291	30.9265	429.2	6.42863	106.424
66	509.854	76030.8	2.543	18.0607	1.57888	0.525732	2.78119	0.0688648	2.28958	0.823236	429.313	9.5093	428.973	9.73107	427.131	35.2322	429.313	9.5093	100.511
27	380.917	802765	2.49491	18.1162	1.67942	0.52715	3.01869	0.0692628	2.50839	0.830953	431.713	10.4744	429.917	10.5808	420.28	37.509	431.713	10.4744	102.72
97	236.75	51652.4	3.75812	17.7483	2.31389	0.538215	3.12692	0.0692805	2.10322	0.672617	431.819	8.7846	437.247	11.1097	465.912	51.2608	431.819	8.7846	92.6826
3	137.474	28630.9	5.98612	18.1371	2.43739	0.526684	2.92582	0.0692816	1.61849	0.553176	431.826	6.76013	429.607	10.2493	417.701	54.4714	431.826	6.76013	103.382
104	193.234	37287	4.2977	17.8518	2.00233	0.535326	2.76372	0.0693104	1.90495	0.689269	432	7.95968	435.338	9.78487	453.014	44.4773	432	7.95968	95.3612
38	417.452	70460.3	2.09146	18.6264	1.76039	0.513172	2.50748	0.0693251	1.78563	0.712121	432.088	7.4626	420.58	8.6348	357.935	39.7392	432.088	7.4626	120.717
91	103.933	16873	5.33481	18.7725	3.14006	0.510418	3.84989	0.0694938	2.22749	0.578584	433.105	9.33043	418.73	13.2109	340.313	71.1166	433.105	9.33043	127.267
56	526.818	4.35108e+06	4.49997	18.2893	1.33403	0.524215	2.87694	0.0695354	2.54895	0.885993	433.356	10.6829	427.963	10.047	399.005	29.8966	433.356	10.6829	108.609
39	212.427	34562.2	4.79057	18.163	1.85246	0.528943	2.64794	0.069678	1.89208	0.714548	434.216	7.94513	431.108	9.30182	414.512	41.4121	434.216	7.94513	104.753
84	592.993	135400	5.23804	18.266	1.47073	0.527274	2.38415	0.0698518	1.87646	0.787056	435.263	7.89789	429.999	8.35779	401.867	32.9442	435.263	7.89789	108.31
30	199.472	26534.3	5.97575	17.9479	2.13615	0.537194	3.59112	0.0699266	2.88669	0.803841	435.714	12.162	436.573	12.7434	441.083	47.5388	435.714	12.162	98.7826
23	572.268	75270.7	1.9012	18.4555	1.56548	0.522732	2.92729	0.0699688	2.47352	0.844986	435.968	10.4272	426.975	10.2039	378.693	35.199	435.968	10.4272	115.124
46	314.461	91384.3	1.85897	18.1355	1.84598	0.532095	3.87462	0.0699871	3.40661	0.879212	436.078	14.3642	433.199	13.6643	417.898	41.244	436.078	14.3642	104.35
11	261.84	48338.8	4.0628	18.04	2.15631	0.535389	2.85246	0.0700496	1.86732	0.654635	436.454	7.88023	435.38	10.0999	429.678	48.0694	436.454	7.88023	101.577
55	177.069	28734.5	6.11104	18.0238	2.02919	0.53804	4.26156	0.0703331	3.74744	0.879358	438.162	15.8743	437.131	15.1383	431.683	45.2193	438.162	15.8743	101.501
58	798.099	118912	6.23124	17.5489	1.34247	0.553106	2.63932	0.0703973	2.2724	0.860977	438.549	9.63416	447.029	9.54427	490.884	29.6098	438.549	9.63416	89.3386
85	230.641	51961.8	6.13133	18.2872	1.72577	0.53094	3.50167	0.0704191	3.04687	0.870119	438.68	12.9214	432.433	12.3315	399.27	38.6751	438.68	12.9214	109.871
103	226.536	35463	2.57731	17.7813	2.39606	0.546101	3.63279	0.0704263	2.73058	0.751648	438.724	11.5812	442.439	13.0295	461.791	53.1188	438.724	11.5812	95.0048
99	325.537	46345	4.72565	18.1142	1.52327	0.536115	2.92799	0.070433	2.50055	0.854017	438.764	10.6065	435.859	10.3764	420.523	34.0185	438.764	10.6065	104.338
98	215.052	73774	3.3612	18.0087	2.27642	0.539483	3.20851	0.0704627	2.26107	0.704711	438.943	9.59445	438.084	11.4171	433.55	50.7338	438.943	9.59445	101.244
10	103.031	36599.5	5.98536	17.4291	2.51925	0.557477	4.56704	0.0704695	3.80936	0.834099	438.984	16.1658	449.883	16.6	506.006	55.4309	438.984	16.1658	86.7545
69	363.901	151639	6.80445	17.7993	1.83451	0.545945	2.65715	0.0704777	1.92224	0.723422	439.033	8.15831	442.337	9.52827	459.561	40.7045	439.033	8.15831	95.5331
36	1223.98	208119	2.81947	18.0478	1.34982	0.538978	1.95584	0.0705496	1.41539	0.723671	439.466	6.01286	437.751	6.9552	428.718	30.0944	439.466	6.01286	102.507
105	509.906	109169	5.77589	17.7996	1.47508	0.54684	2.16269	0.0705943	1.58157	0.731298	439.735	6.72284	442.925	7.76334	459.529	32.7115	439.735	6.72284	95.6926
86	278.066	241777	3.15499	18.2976	1.80137	0.532034	3.22584	0.0706046	2.67603	0.829559	439.797	11.3766	433.158	11.3753	397.987	40.3789	439.797	11.3766	110.505
28	250.399	38855.3	3.64225	17.8809	1.13874	0.545741	2.71076	0.0707742	2.45998	0.907487	440.818	10.4816	442.203	9.71817	449.394	25.3053	440.818	10.4816	98.0918
1	1213.45	213353	23.3307	17.9185	1.11255	0.546449	2.2434	0.0710151	1.94809	0.868367	442.268	8.32689	442.668	8.04931	444.722	24.7459	442.268	8.32689	99.4483
77	43.644	28881.1	5.914	18.0195	4.08844	0.543534	4.66426	0.0710343	2.245	0.481318	442.384	9.59839	440.752	16.6787	432.219	91.1169	442.384	9.59839	102.352
26	856.947	69143.8	3.31186	18.1183	1.46031	0.541068	2.57386	0.0710995	2.11949	0.823467	442.777	9.06956	439.128	9.17606	420.026	32.607	442.777	9.06956	105.417
68	375.037	287023	5.99727	18.0357	1.55882	0.546119	2.67614	0.0714363	2.17527	0.81284	444.803	9.34942	442.451	9.59833	430.213	34.745	444.803	9.34942	103.391
90	1028.49	165532	4.52681	17.7933	1.75403	0.554202	2.87974	0.0715191	2.28392	0.793099	445.301	9.82701	447.745	10.427	460.327	38.8933	445.301	9.82701	96.7358
31	125.483	17989.9	4.67026	17.9806	2.53221	0.549324	3.79474	0.0716362	2.8263	0.744793	446.006	12.1793	444.554	13.6623	437.024	56.3919	446.006	12.1793	102.055
51	420.115	35959.2	3.74567	18.2948	1.05898	0.540115	2.48352	0.071666	2.24643	0.904533	446.185	9.68422	438.5	8.84386	398.332	23.7349	446.185	9.68422	112.013
9	325.86	62209.7	5.43781	17.7713	2.04578	0.556254	2.70241	0.0716953	1.76573	0.653391	446.361	7.61487	449.085	9.80817	463.081	45.3583	446.361	7.61487	96.3894
29	366.093	66102.2	4.01489	17.883	1.77672	0.554547	3.10788	0.0719246	2.54995	0.820477	447.74	11.0297	447.971	11.2576	449.132	39.4807	447.74	11.0297	99.6901
48	163.299	36730.8	6.79157	17.8746	1.53777	0.55579	3.08812	0.0720518	2.67801	0.867199	448.505	11.6027	448.782	11.2021	450.181	34.1781	448.505	11.6027	99.6278
88	78.9574	27060.6	3.57504	17.789	2.5024	0.561193	3.41608	0.072404	2.32543	0.68073	450.623	10.121	452.303	12.4691	460.829	55.4864	450.623	10.121	97.7852
49	192.237	63553.9	5.34132	18.1971	1.98773	0.549078	2.80884	0.0724659	1.98456	0.706542	450.995	8.64438	444.392	10.1096	410.329	44.4684	450.995	8.64438	109.911
75	862.492	150294	3.12586	18.1709	1.36594	0.550544	2.05939	0.072555	1.54121	0.748379	451.53	6.7209	445.353	7.4248	413.542	30.5349	451.53	6.7209	109.186
76	195.597	72508.3	3.97548	17.7726	2.14531	0.564361	3.3669	0.0727456	2.59493	0.770718	452.676	11.3437	454.361	12.3339	462.916	47.5606	452.676	11.3437	97.788
110	176.926	186561	3.93135	18.2743	2.58056	0.548943	3.13097	0.0727557	1.77305	0.566294	452.737	7.75186	444.304	11.2673	400.845	57.8152	452.737	7.75186	112.946
87	1235.54	160751	20.1416	18.2704	0.989242	0.549771	1.89672	0.07285	1.61831	0.853218	453.303	7.08389	444.847	6.83209	401.32	22.1605	453.303	7.08389	112.953
65	193.979	32023.9	4.28635	17.9293	1.68588	0.560598	2.85494	0.0728977	2.30401	0.807027	453.59	10.0916	451.915	10.4136	443.386	37.4917	453.59	10.0916	102.301
4	149.88	167047	5.30971	18.0948	2.81438	0.555876	3.41769	0.072951	1.93904	0.567355	453.91	8.49879	448.838	12.399	422.914	62.8243	453.91	8.49879	107.329
13	272.81	162467	2.69587	17.7523	1.45508	0.56763	2.93653	0.0730836	2.55067	0.868601	454.706	11.1985	456.481	10.797	465.412	32.2538	454.706	11.1985	97.6998
101	250.925	33929.5	3.66312	18.2011	1.82942	0.555107	2.45176	0.0732779	1.63229	0.665762	455.874	7.18417	448.337	8.8866	409.833	40.9224	455.874	7.18417	111.234
54	572.377	125437	4.01109	18.1112	1.18222	0.56084	2.4524	0.0736688	2.14863	0.876135	458.221	9.50374	452.073	8.94774	420.901	26.3935	458.221	9.50374	108.867
107	196.557	47673.1	3.0814	17.7138	1.86432	0.574485	2.74595	0.0738058	2.01608	0.734201	459.044	8.93287	460.911	10.1737	470.21	41.2685	459.044	8.93287	97.6252
24	251.62	41769.9	5.17815	18.2124	1.56719	0.560634	2.3228	0.0740533	1.71445	0.738095	460.529	7.62011	451.939	8.47287	408.447	35.0652	460.529	7.62011	112.751
63	100.489	36725.8	5.2193	17.9472	3.07656	0.569385	3.91509	0.0741141	2.42131	0.618455	460.894	10.7701	457.616	14.4237	441.168	68.4761	460.894	10.7701	104.471
43	117.28	94241.8	6.38036	17.9669	1.85691	0.571582	3.32326	0.0744819	2.75607	0.829329	463.101	12.3158	459.037	12.2732	438.727	41.3287	463.101	12.3158	105.556
106	483.548	103486	4.11141	18.4852	2.06968	0.556817	3.39724	0.0746508	2.694	0.792997	464.115	12.0638	449.452	12.3382	375.084	46.5651	464.115	12.0638	123.736
19	421.407	60723.5	5.32306	18.1185	1.69259	0.568232	4.40195	0.07467	4.06353	0.923121	464.23	18.2009	456.87	16.1967	419.998	37.8018	464.23	18.2009	110.532
42	229.881	51980.1	5.26313	17.3241	1.89401	0.594412	3.51235	0.0746856	2.95792	0.84215	464.323	13.2514	473.682	13.2966	519.248	41.5848	464.323	13.2514	89.4222
92	263.903	175658	3.82224	17.8505	1.55766	0.577052	2.11595	0.0747076	1.4321	0.676814	464.455	6.41752	462.565	7.86163	453.169	34.5813	464.455	6.41752	102.491
72	147.642	315278	9.06745	17.6305	2.24354	0.58439	4.75318	0.0747251	4.19038	0.881594	464.56	18.782	467.279	17.8033	480.637	49.5964	464.56	18.782	96.6551
80	299.23	44343.1	3.6842	17.1903	1.92264	0.605605	3.32113	0.0755042	2.70802	0.815391	469.232	12.2555	480.784	12.7201	536.28	42.068	469.232	12.2555	87.4975
64	211.792	221565	6.35348	18.0543	2.3551	0.578395	3.24162	0.0757362	2.22747	0.687146	470.622	10.1094	463.43	12.0621	427.921	52.5179	470.622	10.1094	109.979
61	187.072	80369.7	4.62633	17.8972	1.73497	0.583486	5.44697	0.0757382	5.16327	0.947916	470.634	23.4344	466.699	20.3826	447.364	38.5672	470.634	23.4344	105.202
93	268.767	61537.8	4.94262	18.186	2.18625	0.574265	2.82153	0.0757438	1.78363	0.63215	470.668	8.09583	460.769	10.4512	411.692	48.8906	470.668	8.09583	114.325
45	429.367	231023	3.06901	17.8414	1.25028	0.586952	2.6815	0.0759504	2.37218	0.884647	471.906	10.7946	468.919	10.0707	454.348	27.7723	471.906	10.7946	103.864
14	449.871	154789	7.51656	17.5956	1.04222	0.600526	1.63344	0.0766364	1.25773	0.769993	476.014	5.77129	477.568	6.2231	485.056	23.0314	476.014	5.77129	98.1361
71	118.189	34785.9	3.9674	17.9156	2.05893	0.593839	3.08391	0.0771611	2.29593	0.744487	479.155	10.6022	473.316	11.6674	445.09	45.7752	479.155	10.6022	107.654
96	468.423	138955	2.84586	17.7008	1.85391	0.607999	2.91349	0.078054	2.24754	0.771426	484.497	10.4901	482.297	11.1861	471.856	41.0397	484.497	10.4901	102.679
8	225.922	34233.1	6.97209	17.1391	1.79555	0.628959	2.94793	0.0781825	2.33801	0.793102	485.265	10.929	495.447	11.5579	542.774	39.2532	485.265	10.929	89.4046
32	122.848	44436.3	4.28497	17.6174	1.71978	0.617749	2.65715	0.0789319	2.02553	0.762297	489.744	9.55248	488.436	10.3029	482.324	37.9889	489.744	9.55248	101.538
52	246.321	86605.3	1.9773	16.9607	1.97859	0.710447	3.36887	0.0873927	2.72662	0.809358	540.099	14.1264	545.011	14.209	565.588	43.0901	540.099	14.1264	95.4933
95	117.069	32339.2	2.13968	16.8459	2.53557	0.720863	3.27655	0.0880736	2.07525	0.633365	544.134	10.8287	551.176	13.9373	580.405	55.1071	544.134	10.8287	93.7508
22	285.471	58455.1	3.34486	16.4643	1.66881	0.843918	2.84083	0.100772	2.299	0.80927	618.933	13.5675	621.305	13.2026	629.935	35.9585	618.933	13.5675	98.2534
18	57.5932	12913.3	1.95865	16.301	3.26895	0.867373	4.59224	0.102546	3.22531	0.70234	629.312	19.3381	634.14	21.6618	651.367	70.1729	629.312	19.3381	96.6139
5	163.436	68714	5.05493	16.1586	2.26904	0.884064	5.28296	0.103606	4.77086	0.903066	635.508	28.8728	643.175	25.1758	670.207	48.5626	635.508	28.8728	94.8226
59	186.685	43881.7	172.626	16.4871	2.47552	0.866669	3.82543	0.103633	2.91646	0.762387	635.662	17.6541	633.757	18.0361	626.947	53.3514	635.662	17.6541	101.39
62	233.306	131068	3.9355	15.7608	1.77574	0.961216	2.80377	0.109874	2.16976	0.773873	672.019	13.8469	683.926	13.9539	723.286	37.6537	672.019	13.8469	92.912
34	127.009	146272	3.05526	14.4464	1.85062	1.48663	2.34731	0.155762	1.44398	0.615162	933.181	12.545	924.94	14.2502	905.322	38.1388	933.181	12.545	103.077
82	551.806	62655.4	32.2907	14.1551	1.92768	1.59922	3.82807	0.16418	3.30729	0.863958	979.965	30.0673	969.905	23.9197	947.179	39.4736	979.965	30.0673	103.461
35	265.09	169032	2.92265	13.8915	1.58797	1.58682	2.5375	0.159874	1.9792	0.779982	956.074	17.5864	965.051	15.8064	985.571	32.3078	956.074	17.5864	97.0071
67	152.419	229344	5.79673	13.475	1.22805	1.86553	2.14066	0.182318	1.75337	0.819081	1079.63	17.4297	1068.95	14.1515	1047.24	24.7827	1079.63	17.4297	103.093
33	316.017	143186	1.87932	12.8246	1.24392	2.16913	4.79625	0.201757	4.63214	0.965783	1184.75	50.1326	1171.2	33.3452	1146.24	24.7159	1146.24	24.7159	103.36
40	137.513	223753	2.53468	12.479	1.7862	2.32779	3.95926	0.21068	3.53345	0.89245	1232.44	39.6383	1220.8	28.1283	1200.29	35.2328	1200.29	35.2328	102.679
17	368.946	56663.7	16.8524	12.4214	1.58884	2.18455	2.33719	0.196803	1.71407	0.73339	1158.12	18.1701	1176.13	16.2808	1209.44	31.275	1209.44	31.275	95.757
57	434.31	192289	5.08891	11.3724	1.19326	2.96992	4.44664	0.24496	4.28354	0.963321	1412.43	54.334	1399.95	33.7897	1380.98	22.9296	1380.98	22.9296	102.277
20	134.658	358839	2.79139	10.9283	1.45542	3.31896	2.33063	0.263059	1.82032	0.781044	1505.47	24.4399	1485.52	18.1875	1457.13	27.6788	1457.13	27.6788	103.318
53	300.29	198526	6.2233	10.6842	1.06915	3.28863	2.28902	0.254832	2.02399	0.884216	1463.35	26.4971	1478.36	17.8246	1499.96	20.2144	1499.96	20.2144	97.5589
89	56.4128	93998	3.04821	9.67599	1.30941	4.35025	2.45411	0.305287	2.07559	0.845763	1717.47	31.2944	1702.94	20.2638	1685.09	24.1666	1685.09	24.1666	101.922
2	166.009	70896.1	6.10224	7.59	1.1662	7.34516	2.23932	0.404336	1.91168	0.85369	2188.97	35.4821	2154.32	20.0156	2121.43	20.4326	2121.43	20.4326	103.184
44	225.454	148927	2.26409	6.40739	1.49081	10.0695	3.53775	0.467939	3.2083	0.906875	2474.51	65.9309	2441.18	32.6879	2413.51	25.317	2413.51	25.317	102.528
Rejected Analyses: >10% discordant; >5% rev discordant; >10% 2s err; grains <500 Ma-evaluated by 1s err concordance; 1200 Ma cutoff
15	2825.68	42414.8	0.929746	15.6492	1.28032	0.198356	2.42897	0.0225131	2.06414	0.8498	143.519	2.9297	183.734	4.08238	738.341	27.0752	143.519	2.9297	NA
16	514.351	60937.5	6.13514	16.0395	3.53532	0.568575	6.24959	0.0661422	5.15353	0.824619	412.871	20.6105	457.092	23.0058	686.015	75.4795	412.871	20.6105	60.1841
100	1148.09	42262.4	4.67972	15.0321	3.3825	0.64877	4.13489	0.0707311	2.37824	0.575165	440.559	10.1276	507.722	16.522	822.932	70.6528	440.559	10.1276	53.5353
78	1317.05	72597	4.51726	16.2754	3.74063	0.600997	4.33635	0.070942	2.19354	0.50585	441.828	9.36704	477.866	16.5301	654.735	80.2886	441.828	9.36704	67.482
12	78.5792	26666	3.14084	16.6815	2.8679	0.713512	3.73819	0.0863247	2.39774	0.641419	533.764	12.2828	546.83	15.8067	601.629	62.087	533.764	12.2828	88.7199
37	17.905	4903	5.92147	17.4183	7.06795	0.730822	7.41491	0.0923242	2.24164	0.302315	569.268	12.2137	557.035	31.8007	507.334	155.624	569.268	12.2137	112.208
70	29.2001	11167.9	2.50331	17.6621	3.59236	0.765987	4.67271	0.0981211	2.98817	0.639494	603.388	17.2122	577.458	20.5822	476.707	79.4688	603.388	17.2122	126.574
7	485.696	18597	1.46948	7.33863	24.0124	1.86505	25.9185	0.0992666	9.75547	0.376391	610.11	56.7908	1068.78	172.97	2180.25	424.612	2180.25	424.612	27.9834
14BJ25, Romanzof Formation						(n=23/39)
23	125.854	22740.8	2.73814	17.0008	3.18002	0.588809	5.2623	0.0726012	4.19277	0.796756	451.808	18.2947	470.107	19.8045	560.442	69.3254	451.808	18.2947	80.6164
19	177.057	28031.6	2.53569	17.2897	2.48294	0.57698	3.04114	0.0723516	1.75601	0.577418	450.308	7.63759	462.519	11.2985	523.601	54.4565	450.308	7.63759	86.002
24	260.255	35697.2	2.8232	17.2684	2.93704	0.58297	3.38792	0.0730124	1.68872	0.498453	454.279	7.40742	466.368	12.6695	526.354	64.3965	454.279	7.40742	86.3066
2	219.055	32233.6	3.14354	17.0521	1.94346	0.625473	2.66832	0.0773546	1.82836	0.68521	480.313	8.46266	493.272	10.4258	553.904	42.41	480.313	8.46266	86.7141
17	359.034	125872	1.85608	17.4605	1.69946	0.575102	3.3464	0.0728283	2.88275	0.861447	453.173	12.6152	461.309	12.407	502.02	37.404	453.173	12.6152	90.2698
20	82.7815	31765.6	2.56347	17.4384	3.10849	0.579376	4.63114	0.0732769	3.43289	0.741263	455.868	15.1089	464.06	17.2518	504.798	68.4259	455.868	15.1089	90.3071
18	1257.5	193176	1.21742	17.3054	1.73303	0.609604	3.35598	0.0765118	2.87389	0.856348	475.269	13.1674	483.31	12.9063	521.612	38.0064	475.269	13.1674	91.1153
34	649.508	50451.8	8.31401	17.6499	1.49456	0.546899	2.14584	0.070008	1.53978	0.717563	436.204	6.49437	442.963	7.70338	478.211	33.058	436.204	6.49437	91.2158
21	540.05	58926.6	2.61155	17.5419	1.98821	0.570021	4.05891	0.0725214	3.53861	0.871813	451.329	15.4245	458.028	14.9643	491.801	43.8479	451.329	15.4245	91.7705
11	420.887	39996.5	2.43101	17.4212	1.9739	0.599137	4.59523	0.0757012	4.14969	0.903041	470.412	18.8255	476.686	17.4832	506.965	43.4194	470.412	18.8255	92.7898
14	199.959	31362.9	2.70099	17.3854	2.21946	0.60894	3.84177	0.076782	3.13579	0.816236	476.886	14.4144	482.892	14.7648	511.524	48.7845	476.886	14.4144	93.2285
35	842.242	180849	3.32744	17.4076	2.02505	0.608589	3.34514	0.0768354	2.66254	0.795943	477.206	12.2469	482.67	12.8513	508.711	44.5217	477.206	12.2469	93.8069
26	607.899	66803.3	6.113	17.7206	1.89117	0.550937	2.75169	0.0708075	1.99882	0.726397	441.019	8.5204	445.61	9.92547	469.383	41.8903	441.019	8.5204	93.9571
4	848.61	73999.3	1.69487	17.5992	1.34034	0.579178	3.05554	0.0739273	2.74587	0.898653	459.773	12.1851	463.933	11.3794	484.599	29.6118	459.773	12.1851	94.877
7	944.685	58134.4	1.30885	17.6506	1.47898	0.570444	2.87162	0.073025	2.46147	0.85717	454.354	10.7988	458.302	10.5917	478.119	32.7032	454.354	10.7988	95.0295
6	1532.61	118104	2.08104	17.6195	1.87248	0.581391	3.36257	0.0742951	2.79297	0.830607	461.98	12.4515	465.355	12.5531	482.062	41.3653	461.98	12.4515	95.8342
27	767.414	125170	1.95677	17.7537	1.71385	0.562005	2.93375	0.0723647	2.3811	0.811622	450.387	10.3581	452.83	10.7183	465.236	37.9695	450.387	10.3581	96.8082
12	682.549	51488.5	2.03618	17.6671	1.98861	0.582503	3.59925	0.0746385	3.00001	0.833509	464.041	13.432	466.068	13.4531	476.069	43.9757	464.041	13.432	97.4734
33	518.11	36708.4	3.63487	17.7906	1.56267	0.564934	2.56333	0.0728932	2.03192	0.792689	453.563	8.8993	454.733	9.3961	460.629	34.6595	453.563	8.8993	98.4661
16	270.86	16034.8	2.13059	17.6705	2.0185	0.597294	3.10685	0.0765483	2.36181	0.760195	475.487	10.8259	475.515	11.797	475.63	44.6404	475.487	10.8259	99.9699
25	412.151	170158	1.86161	17.7974	1.65325	0.576306	2.34991	0.0743891	1.66998	0.710658	462.544	7.45379	462.085	8.72376	459.799	36.6825	462.544	7.45379	100.597
8	413.507	166562	2.46455	17.6366	2.41287	0.62297	3.57697	0.0796856	2.6406	0.738223	494.246	12.5633	491.707	13.9421	479.879	53.3369	494.246	12.5633	102.994
37	208.31	20044	2.25457	17.8626	1.89822	0.578184	2.54027	0.0749046	1.68812	0.664543	465.637	7.58333	463.294	9.44999	451.675	42.1688	465.637	7.58333	103.091
Rejected Analyses: >10% discordant; >5% rev discordant; >10% 2s err; grains <500 Ma-evaluated by 1s err concordance; 1200 Ma cutoff
5	572.06	30917.5	3.08502	13.9304	2.34389	0.437904	4.14813	0.0442427	3.42245	0.825059	279.078	9.34752	368.774	12.8279	979.846	47.7533	279.078	9.34752	NA
9	2719.78	80447.7	3.15249	15.1486	2.71463	0.425532	4.60752	0.0467524	3.7229	0.808005	294.552	10.7191	359.999	13.9662	806.759	56.8471	294.552	10.7191	NA
38	380.546	40563.1	4.17521	15.2062	3.62486	0.479176	5.78344	0.0528463	4.5065	0.779208	331.973	14.5817	397.507	19.0258	798.808	76.0087	331.973	14.5817	NA
29	1991.45	47333.5	1.96226	16.1475	2.827	0.478766	3.88371	0.0560694	2.66295	0.685672	351.677	9.11413	397.226	12.768	671.687	60.5128	351.677	9.11413	NA
28	849.326	188877	1.6903	16.9503	1.0469	0.497549	3.15834	0.0611664	2.97979	0.943465	382.715	11.0722	410.042	10.6552	566.964	22.7993	382.715	11.0722	NA
3	527.046	73837.8	2.06218	17.0486	1.72924	0.554406	2.76486	0.0685513	2.15736	0.780278	427.422	8.92199	447.879	10.0134	554.335	37.7358	427.422	8.92199	77.1053
31	534.388	48019.5	4.61136	17.159	1.65907	0.559346	3.8484	0.06961	3.47242	0.902301	433.805	14.5679	451.1	14.0177	540.264	36.3075	433.805	14.5679	80.2951
22	112.353	74701.6	2.51349	16.4048	3.06345	0.58746	5.14644	0.0698955	4.13536	0.803537	435.526	17.4157	469.244	19.3404	637.761	65.9196	435.526	17.4157	68.2899
15	435.044	41371.7	1.72988	16.8834	2.67452	0.573223	4.09077	0.0701912	3.09538	0.756672	437.308	13.0874	460.097	15.1356	575.55	58.1737	437.308	13.0874	75.9809
36	361.993	70068.3	2.23705	17.0887	2.50978	0.576474	3.74818	0.0714474	2.78385	0.742721	444.87	11.9668	462.193	13.9178	549.243	54.814	444.87	11.9668	80.9969
32	1073.87	103129	2.5721	17.0302	2.13258	0.579217	4.21098	0.0715417	3.63104	0.862279	445.437	15.6279	463.958	15.6837	556.728	46.5062	445.437	15.6279	80.0098
1	342.658	50145.8	2.61363	17.0785	1.78622	0.591201	3.17943	0.0732293	2.63024	0.82727	455.582	11.5693	471.635	11.9952	550.506	39.0202	455.582	11.5693	82.757
10	153.958	27893.3	3.48593	16.9059	3.29323	0.598874	5.91392	0.0734296	4.91214	0.830606	456.785	21.6615	476.519	22.4956	572.662	71.6559	456.785	21.6615	79.7652
30	1461.11	77305.1	2.10165	15.9145	1.50821	0.649263	2.84255	0.0749399	2.40943	0.847631	465.848	10.8283	508.025	11.3628	702.695	32.1157	465.848	10.8283	66.2945
39	513.847	64442	2.05418	16.2639	3.51503	0.636736	4.2074	0.0751074	2.31231	0.549582	466.853	10.4135	500.283	16.6212	656.287	75.414	466.853	10.4135	71.1356
13	337.198	28170.8	2.33792	14.9183	6.06544	0.71004	6.44953	0.0768245	2.19245	0.33994	477.141	10.0833	544.77	27.1981	838.745	126.401	477.141	10.0833	56.8875
Notes:
1. Analyses with >10% uncertainty (2-sigma) in 206Pb/238U age are not included.
2. Analyses with >10% uncertainty (2-sigma) in 207Pb/206Pb age are not included.
3. Best age is determined from 206Pb/238U age for analyses with 206Pb/238U age <1200 Ma and from 207Pb/206Pb age for analyses with 206Pb/238Uage >1200 Ma.
4. Concordance for ages >500 Ma is based on 206Pb/238U age / 207Pb/206Pb age. Concordance of ages <500 Ma is evaluated based on overlap of 206Pb/238U and 207Pb/206Pb ages using 1s uncertainty.
5. Analyses with 206Pb/238U age >500 Ma and with >10% discordance (<90% concordance) are not included (or are rejected).
6. Analyses with 206Pb/238U age >500 Ma and with >5% reverse discordance (<105% concordance) are not included.
7. All uncertainties are reported at the 1-sigma level, and include measurement errors and an additional factor to account for overdispersion of standard measurements.
8. Systematic errors (at 2-sigma level) include contributions from U decay constants, composition of common Pb, true age of the standard, and scatter of measured age of the standards.
	Values for 206/238 and 206/207 range from 0.7% to 1.2% (2-sigma) for the samples analyzed.
9. Analyses conducted by LA-MC-ICPMS, as described by Gehrels et al. (2008) and Gehrels and Pecha (2014)
10. U concentration and U/Th are calibrated relative to SL, R33 and FC1 zircon standards and are accurate to ~20%.
11. Common Pb correction is from measured 204Pb with common Pb composition interpreted from Stacey and Kramers (1975).
12. Common Pb composition assigned uncertainties of 1.5 for 206Pb/204Pb, 0.3 for 207Pb/204Pb, and 2.0 for 208Pb/204Pb.
13. U/Pb and 206Pb/207Pb fractionation is calibrated relative to zircon standards SL, R33 and FC1.
14. U decay constants and composition as follows: 238U = 9.8485 x 10-10, 235U = 1.55125 x 10-10, 238U/235U = 137.88.
15. Weighted mean and concordia plots determined with Isoplot (Ludwig, 2008).
Gehrels, G.E., and Pecha, M., 2014, Detrital Zircon U-Pb geochronology and Hf Isotope Geochemistry of Paleozoic and Triassic Passive Margin Strata of Western North America: Geosphere (in press).
Gehrels, G.E., Valencia, V.A., Ruiz, J., 2008. Enhanced precision, accuracy, efficiency, and spatial resolution of U-Pb ages by laser ablation-multicollector-inductively coupled plasma mass spectrometry: Geochemistry Geophysics Geosystems 9 (Q03017), 13.
Ludwig, K.R., 2008, Isoplot 3.6: Berkeley Geochronology Center Special Publication No. 4, 77 p.
Stacey, J.S., and Kramers, J.D., 1975, Approximation of terrestrial lead isotopic evolution by a two-stage model: Earth and Planetary Science Letters, v. 26, p. 207-221.

## Sheet: Table DR6
Table DR6. Hf isotopic data from the northeast Brooks Range basinal succession, Alaska and Yukon.
Sample	(176Yb + 176Lu) / 176Hf (%)	Volts Hf	176Hf/177Hf	± (1s)	176Lu/177Hf	176Hf/177Hf (T)	E-Hf (0)	E-Hf (0) ± (1s)	E-Hf (T)	Age (Ma)
F1147, Firth River Group, Redwacke Formation				(U-Pb data in Strauss et al, 2013, Lithosphere)
1	10.0809	2.52064	0.282095	2.60159e-05	0.000577113	0.282082	-24.411	0.919987	1.96948	1196.28
2	20.8398	2.09225	0.282331	2.57371e-05	0.00108791	0.282304	-16.0399	0.910128	13.1199	1339.74
4	10.8828	3.47696	0.282172	2.3135e-05	0.000616296	0.282158	-21.6755	0.818112	4.74165	1199
6	11.948	2.79634	0.281665	2.16394e-05	0.000730578	0.281637	-39.6135	0.765224	4.71241	2003.64
8	13.6378	2.44518	0.281175	2.82739e-05	0.00092848	0.281127	-56.9245	0.999836	3.32818	2722
10	13.0148	3.26308	0.282032	2.39968e-05	0.000813405	0.28201	-26.6214	0.848589	5.3165	1454.71
12	16.0189	2.71329	0.281973	2.5613e-05	0.000930932	0.281951	-28.7153	0.905741	-1.09762	1265.53
13	7.3583	1.90182	0.282182	2.63633e-05	0.000545492	0.282169	-21.3201	0.932272	6.3361	1251.73
20	10.9893	2.70892	0.282321	2.89223e-05	0.000702726	0.282307	-16.4048	1.02276	6.98918	1065.66
21	6.99003	2.43856	0.281753	3.14245e-05	0.000448409	0.281737	-36.488	1.11125	4.96726	1860.39
22	8.17558	2.52656	0.281298	2.43573e-05	0.000479152	0.281281	-52.5704	0.861336	-10.9276	1873.34
23	12.2668	2.79153	0.281586	3.50523e-05	0.000769114	0.281559	-42.3916	1.23954	-0.81349	1884.81
24	5.86017	2.95961	0.28109	2.64671e-05	0.000355446	0.281077	-59.9438	0.935945	-18.8169	1845.2
25	15.4027	2.63887	0.282054	3.16276e-05	0.000948805	0.282028	-25.8658	1.11843	4.72774	1400.05
28	19.27	2.49765	0.281924	2.03859e-05	0.00123943	0.281885	-30.4298	0.720896	6.27354	1689.85
39	14.3749	3.03177	0.282091	2.03457e-05	0.000924865	0.282073	-24.5523	0.719475	-2.2104	1026
41	7.35702	2.82627	0.281171	2.49867e-05	0.000483607	0.281147	-57.0615	0.883594	1.25426	2602.59
50	15.0464	2.76007	0.282107	2.50989e-05	0.000926387	0.282083	-23.9626	0.88756	6.99148	1415.05
53	14.3041	2.92273	0.282261	2.87515e-05	0.000891979	0.28224	-18.5386	1.01673	8.01167	1214.61
54	11.124	3.01144	0.282255	1.94879e-05	0.000672721	0.282241	-18.7461	0.689141	5.60031	1107.76
57	8.05451	2.12625	0.282392	2.87551e-05	0.000512475	0.282382	-13.8818	1.01685	10.4658	1101.96
62	9.84564	3.02661	0.282297	2.39282e-05	0.000585532	0.282285	-17.2536	0.846162	6.75607	1089.61
65	21.0833	2.27352	0.28219	2.38665e-05	0.00121353	0.282159	-21.0432	0.843979	8.611	1368.01
66	15.8091	2.76107	0.281911	2.31462e-05	0.000941547	0.281881	-30.9147	0.818509	5.36218	1655.69
72	12.5286	2.80759	0.281963	2.32341e-05	0.000864335	0.281936	-29.0691	0.821616	7.2183	1652
76	30.1937	2.3067	0.282246	2.78782e-05	0.00170928	0.282203	-19.0607	0.985845	9.23404	1326
77	16.933	3.50275	0.281985	1.67574e-05	0.00114855	0.281963	-28.2778	0.592585	-6.4259	1011
78	10.8108	3.14318	0.28223	1.85799e-05	0.000660787	0.282217	-19.6155	0.657032	4.40909	1093
80	9.37971	2.97794	0.282117	2.37635e-05	0.000587965	0.282105	-23.6271	0.840339	-0.339397	1058
81	9.17113	3.60107	0.281401	2.20828e-05	0.0005447	0.281381	-48.9568	0.780906	-7.59314	1864
83	7.91424	2.97484	0.281653	2.44061e-05	0.000498588	0.281634	-40.0417	0.863061	4.12582	1983
86	18.4009	2.53213	0.28214	3.19401e-05	0.00106319	0.282117	-22.8167	1.12948	2.04952	1145
91	27.0328	2.29563	0.282074	2.81873e-05	0.00178447	0.282025	-25.1341	0.996775	6.08329	1465
93	2.68192	2.19571	0.281179	2.01473e-05	0.000187795	0.281169	-56.793	0.712461	3.17695	2651
96	4.84967	2.44531	0.281237	3.14065e-05	0.000290552	0.281226	-54.7397	1.11061	-11.1837	1947
J1111, Firth River Group, Sheep Creek Formation				(U-Pb data in Strauss et al, 2013, Lithosphere)
6	6.19072	3.85323	0.280849	3.13991e-05	0.000407964	0.280825	-68.4471	1.11035	2.05381	3123.62
7	12.017	4.54078	0.282241	1.85415e-05	0.000734941	0.282225	-19.2381	0.655675	5.88152	1144.67
10	20.8042	3.49712	0.281981	2.63804e-05	0.00135091	0.281944	-28.4424	0.93288	2.94249	1453.7
13	19.9952	4.54542	0.28225	2.4324e-05	0.00119915	0.282223	-18.9313	0.860159	6.59967	1179.6
2	16.4553	4.37366	0.282177	2.55443e-05	0.000958342	0.282152	-21.5154	0.903312	8.12477	1356.89
1	17.5184	3.71835	0.281856	3.26422e-05	0.00125553	0.281816	-32.8691	1.15431	3.07385	1656.74
5	7.49282	4.35418	0.281532	2.12924e-05	0.000483309	0.281515	-44.2997	0.752955	-2.644	1872.59
29	15.8245	3.87563	0.282047	2.2411e-05	0.00106099	0.282014	-26.1021	0.792511	9.05623	1610.58
24	13.7718	4.16252	0.282157	2.53311e-05	0.000898328	0.282134	-22.2023	0.895773	7.28756	1347.76
22	6.65391	3.22142	0.281656	2.84505e-05	0.000442668	0.281641	-39.918	1.00608	1.41205	1855.21
37	9.21306	4.9466	0.281953	2.09909e-05	0.000579003	0.281938	-29.4222	0.742291	0.20798	1342.13
33	9.99252	4.80627	0.282232	2.71814e-05	0.000637791	0.28222	-19.5411	0.961204	2.94438	1023.09
34	15.1519	3.39625	0.282012	2.89638e-05	0.000949549	0.281989	-27.3206	1.02423	1.57165	1323.6
58	2.6824	3.99861	0.282407	2.21941e-05	0.000200244	0.282402	-13.3724	0.78484	13.4433	1200.86
39	11.2545	4.52881	0.281962	1.76556e-05	0.000718559	0.281948	-29.1073	0.624346	-6.58471	1028.25
40	43.439	2.90362	0.282393	4.0938e-05	0.00245637	0.28234	-13.8703	1.44767	9.63641	1130.04
49	21.9942	4.06442	0.282144	1.9566e-05	0.00156339	0.282101	-22.6659	0.691904	8.67488	1460.32
51	7.14087	3.82875	0.281823	2.9568e-05	0.000471073	0.281807	-34.0064	1.0456	7.19017	1849.81
47	11.5816	4.60771	0.2823	1.95883e-05	0.000709521	0.282286	-17.1399	0.692692	5.53594	1033.62
48	48.8414	3.85586	0.28225	3.64082e-05	0.00265114	0.282194	-18.9018	1.28749	4.54173	1134.67
50	7.31988	3.46419	0.281838	2.82812e-05	0.000471384	0.281822	-33.477	1.00009	7.73628	1850.47
67	13.2519	4.58982	0.282174	2.09918e-05	0.000891051	0.282157	-21.5961	0.742324	0.812467	1027.66
74	22.4828	3.68873	0.281974	3.25558e-05	0.00148837	0.281933	-28.6842	1.15126	2.70629	1460.13
82	20.3081	4.38397	0.281933	2.58949e-05	0.00133618	0.281892	-30.1307	0.915711	5.04882	1625.73
94	8.89566	4.22425	0.281026	2.34044e-05	0.000617968	0.280992	-62.1979	0.827638	1.95785	2867.52
J1334, Firth River Group, Fish Creek Formation
18	5.32104	4.48741	0.28131	1.99256e-05	0.000321128	0.281298	-52.1638	0.704621	-8.89224	1935.82
16	8.48178	4.24913	0.281464	2.27313e-05	0.000580522	0.281442	-46.7252	0.803835	-3.03504	1968.14
20	2.38063	2.28315	0.281805	5.24776e-05	0.000192857	0.281799	-34.647	1.85574	5.95288	1808.77
100	8.28081	3.84017	0.281697	2.13926e-05	0.000525186	0.281681	-38.4684	0.756497	-2.1869	1636.61
99	7.70181	4.6754	0.281472	3.26402e-05	0.000483008	0.281453	-46.4467	1.15424	-1.40571	2021.66
38	10.7531	4.87222	0.281162	1.99356e-05	0.00073801	0.281124	-57.3856	0.704975	2.82378	2704.86
96	7.80589	4.20716	0.281453	2.2408e-05	0.000493586	0.281436	-47.1062	0.792404	-6.39668	1832.01
41	8.56324	4.22017	0.281438	2.01334e-05	0.000533081	0.281419	-47.6332	0.711967	-5.07215	1915.86
42	7.65715	4.14022	0.280964	1.86656e-05	0.000529906	0.280936	-64.4026	0.660064	-3.10399	2737.28
43	17.6976	3.90177	0.281393	2.51504e-05	0.00112252	0.281348	-49.2306	0.889382	-3.76578	2080.24
47	8.80948	2.57706	0.281442	2.12844e-05	0.000596254	0.281421	-47.5041	0.75267	-6.26067	1861.28
80	20.8078	2.73542	0.281403	3.06178e-05	0.00138357	0.281342	-48.8654	1.08272	1.44778	2314.38
76	7.47043	4.64866	0.281458	1.87303e-05	0.000484717	0.281441	-46.94	0.662352	-5.69048	1855.28
J1114, Firth River Group, Fish Creek Formation				(U-Pb data in Strauss et al, 2013, Lithosphere)
4	6.12844	3.54359	0.281538	2.48423e-05	0.000415287	0.281523	-44.1075	0.878489	-2.42553	1869.93
6	5.96921	3.41618	0.281375	2.98669e-05	0.00038365	0.281361	-49.855	1.05617	-7.88832	1881.74
7	9.00027	3.02344	0.282335	4.28324e-05	0.000601326	0.282322	-15.9096	1.51466	8.60225	1112.48
13	11.9555	3.36878	0.282052	4.77717e-05	0.00076174	0.282031	-25.9348	1.68933	5.89358	1447.45
16	26.4911	2.67111	0.282213	3.87097e-05	0.00174777	0.282165	-20.2143	1.36887	11.2729	1475.02
17	13.1637	3.11059	0.282161	3.4339e-05	0.00088987	0.282138	-22.0774	1.21432	7.14666	1335.45
19	9.14033	2.31224	0.282081	4.01117e-05	0.000676315	0.282064	-24.882	1.41845	4.60405	1338.99
18	21.133	2.66635	0.281943	3.82995e-05	0.0014298	0.281907	-29.7841	1.35437	-1.18442	1330.06
20	4.85905	3.15376	0.280992	3.22841e-05	0.000320549	0.280974	-63.4196	1.14165	0.679002	2840.46
21	17.3494	2.98112	0.281597	4.7437e-05	0.00103844	0.28156	-42.0233	1.67749	-1.16832	1867.71
51	6.14265	2.25743	0.281452	6.23544e-05	0.000484108	0.281434	-47.1537	2.20501	-4.09237	1934.97
25	18.5699	2.14942	0.282299	3.5125e-05	0.00140071	0.282268	-17.1885	1.24211	7.77751	1160.78
24	10.4752	2.16719	0.282041	5.41144e-05	0.000739904	0.282021	-26.2967	1.91362	5.09717	1427.13
26	8.89878	4.35367	0.282059	4.48618e-05	0.000669221	0.282041	-25.6727	1.58643	5.78584	1426.9
27	10.7659	2.12664	0.282045	8.07438e-05	0.000693192	0.282027	-26.1786	2.85531	3.9494	1368.55
29	67.3072	1.76106	0.282277	5.43036e-05	0.00358193	0.282189	-17.955	1.92031	8.24582	1304.8
35	9.35603	1.79578	0.282093	5.45356e-05	0.000758294	0.282073	-24.4569	1.92852	6.82418	1422.61
32	13.2521	3.37535	0.282085	3.50832e-05	0.000879247	0.282061	-24.7611	1.24063	6.82177	1441.38
34	14.5327	3.15602	0.282148	3.21321e-05	0.00110076	0.282121	-22.5395	1.13627	4.92503	1264.31
33	23.1558	2.27588	0.282008	3.84566e-05	0.0016632	0.281962	-27.483	1.35992	3.83669	1464.58
38	10.8904	3.70961	0.282301	3.14307e-05	0.000688208	0.282287	-17.1087	1.11147	7.00769	1097.75
36	10.9515	3.24475	0.282273	4.47093e-05	0.000699631	0.282256	-18.1194	1.58103	9.30595	1246.77
37	18.1809	2.56328	0.282237	3.49318e-05	0.00112443	0.282212	-19.3639	1.23528	6.34489	1185.05
39	11.8202	3.49157	0.282237	2.79135e-05	0.000772761	0.282222	-19.3613	0.987092	3.58232	1047.91
41	15.0964	3.21703	0.281782	3.79458e-05	0.00102309	0.28173	-35.4743	1.34186	22.885	2640.82
42	0.74739	3.26057	0.281132	4.8145e-05	4.60183e-05	0.281131	-58.4516	1.70253	-21.9344	1627.08
43	11.3442	2.62721	0.282092	5.10322e-05	0.000763744	0.282071	-24.4954	1.80463	7.37786	1449.33
44	26.3943	2.2145	0.282268	3.9676e-05	0.0016368	0.282235	-18.2763	1.40305	4.55908	1070.81
48	7.36492	2.99531	0.282355	5.7315e-05	0.000542428	0.282344	-15.1988	2.0268	8.8521	1089.82
49	14.224	2.83362	0.281149	3.22033e-05	0.00108049	0.281094	-57.8425	1.13879	1.21728	2682.17
5	14.8813	4.16637	0.281522	2.77266e-05	0.00101418	0.281484	-44.656	0.980485	-1.07028	1988.78
J1115, Firth River Group, Sheep Creek formation				(U-Pb data in Strauss et al, 2013, Lithosphere)
5	13.7042	4.15663	0.282262	2.58008e-05	0.000936716	0.282243	-18.4903	0.912384	4.90597	1073.55
4	14.194	3.78005	0.281497	2.18864e-05	0.000948389	0.28146	-45.5461	0.773959	-0.0749168	2068.87
10	3.95436	3.42297	0.281193	3.26465e-05	0.00028176	0.281179	-56.2878	1.15446	4.72439	2702.94
7	8.63672	3.5783	0.281235	3.03641e-05	0.000566361	0.281215	-54.8161	1.07375	-14.1354	1836.13
16	12.8997	2.74836	0.281597	2.97409e-05	0.000737513	0.281572	-41.994	1.05171	-2.55355	1788.12
17	14.263	2.70524	0.282178	3.40094e-05	0.000858709	0.282159	-21.4589	1.20266	4.03298	1166.01
24	34.4744	3.36912	0.281569	3.07388e-05	0.00208488	0.281496	-42.9976	1.087	-4.16653	1835.29
27	13.1129	2.17449	0.281481	3.69799e-05	0.000723018	0.281457	-46.1079	1.3077	-6.75205	1784.33
30	18.6452	2.30432	0.282187	3.13863e-05	0.00115298	0.282158	-21.132	1.1099	7.75223	1330.59
31	21.7096	2.76687	0.281797	2.93069e-05	0.00126589	0.281763	-34.9334	1.03637	-4.02121	1429.4
44	9.80433	1.81779	0.282223	3.54416e-05	0.000570972	0.28221	-19.8899	1.25331	6.23043	1183.89
41	7.47467	2.53654	0.28139	3.61356e-05	0.000418955	0.281376	-49.3227	1.27785	-8.43919	1836.01
50	12.0502	2.14837	0.281174	3.71723e-05	0.000757039	0.281138	-56.9712	1.31451	-1.23678	2510.9
99	13.3052	2.61197	0.282134	2.72038e-05	0.000797552	0.282112	-23.0063	0.961994	8.91567	1452.77
97	15.2761	2.5148	0.281624	3.21499e-05	0.000872007	0.281595	-41.0435	1.1369	-1.78756	1786.95
93	7.15948	2.50843	0.282272	3.35627e-05	0.000420533	0.282263	-18.142	1.18686	6.5936	1116.71
63	7.05038	3.624	0.282152	2.45542e-05	0.000512809	0.282141	-22.3723	0.8683	3.59881	1175.47
64	16.4757	2.26792	0.281429	3.89431e-05	0.00105312	0.281389	-47.9522	1.37713	-3.95913	2009.97
66	16.2379	3.55905	0.282212	2.13245e-05	0.00110478	0.282185	-20.2532	0.754087	8.4534	1320.47
68	12.0507	3.15873	0.281201	3.05342e-05	0.000857118	0.281156	-56.0294	1.07977	4.73493	2738.32
86	4.61442	4.47496	0.281176	2.33379e-05	0.000301045	0.281161	-56.9037	0.825289	0.893501	2566.28
90	24.8036	2.95135	0.281976	3.09862e-05	0.0016633	0.28193	-28.6227	1.09575	2.294	1446.22
84	11.4835	3.04477	0.282335	3.56998e-05	0.000807757	0.282318	-15.911	1.26244	7.9159	1088.52
72	14.0418	3.48201	0.28152	2.72458e-05	0.000927317	0.281488	-44.7321	0.963483	-4.25101	1845.3
73	3.37239	3.64502	0.281241	2.63349e-05	0.000223544	0.281232	-54.6042	0.931268	-8.37428	2059.61
75	12.4288	4.1701	0.281486	2.69554e-05	0.000838984	0.281465	-45.9468	0.953213	-16.7609	1334.91
J1327, Neruokpuk Formation
6	7.79743	4.51434	0.281394	3.20662e-05	0.000479341	0.281378	-49.1809	1.13394	-8.42315	1833.74
11	15.273	4.54308	0.281421	1.76771e-05	0.000964244	0.281383	-48.2295	0.625106	-2.32327	2089.75
19	8.82202	4.28136	0.281243	1.88962e-05	0.000608787	0.281212	-54.5277	0.668219	5.42309	2682.55
17	14.3956	4.25722	0.281174	2.22028e-05	0.000949018	0.281126	-56.959	0.785148	2.1383	2673.04
26	6.51253	3.79807	0.281195	2.88064e-05	0.000429888	0.281174	-56.2142	1.01867	2.73166	2625.49
30	3.99892	4.76364	0.281391	3.56642e-05	0.000251561	0.281382	-49.3017	1.26118	-5.92005	1936.11
31	8.62405	4.94955	0.282302	2.39516e-05	0.000514244	0.282292	-17.0727	0.846989	7.19603	1098.85
34	12.7565	4.09514	0.282053	1.94171e-05	0.000823294	0.28203	-25.8881	0.686637	5.83182	1445.26
35	4.48964	5.41479	0.281206	1.9228e-05	0.000363829	0.281188	-55.8282	0.67995	4.61155	2684.67
32	6.53703	4.1221	0.281461	2.32269e-05	0.000421249	0.281446	-46.821	0.821361	-6.05586	1830.48
40	32.7866	3.46223	0.282325	2.75558e-05	0.00199318	0.282306	-16.2536	0.974442	-5.12538	530.932
71	6.10485	4.80471	0.28139	1.9592e-05	0.000400148	0.281375	-49.327	0.692824	-6.2772	1930.08
72	36.5827	3.01392	0.281982	3.65234e-05	0.00192663	0.281936	-28.3917	1.29156	-1.59219	1266.69
73	16.6605	4.28192	0.28195	1.80049e-05	0.00117931	0.281918	-29.5219	0.636698	1.77165	1442.13
74	19.155	3.56453	0.282089	2.46649e-05	0.00123029	0.282056	-24.6108	0.872215	6.53065	1436.75
57	10.541	4.61106	0.281454	1.73226e-05	0.000673241	0.281427	-47.0727	0.61257	-0.886669	2083.71
54	11.3983	4.13466	0.282043	2.2572e-05	0.000707279	0.282024	-26.2324	0.798205	5.41704	1437.14
62	5.98922	4.04575	0.281833	2.59413e-05	0.000387007	0.281819	-33.6751	0.91735	7.82862	1858.62
70	6.37743	4.6929	0.281425	2.34913e-05	0.000407247	0.281409	-48.0811	0.830713	-1.55394	2082.45
65	19.1517	2.99134	0.282399	2.42674e-05	0.00110811	0.282385	-13.6337	0.858157	1.75822	712.622
67	6.99139	4.61481	0.282313	2.2317e-05	0.000437956	0.282307	-16.7037	0.789188	-1.19001	704.016
68	6.24535	4.75937	0.281461	1.93133e-05	0.000410161	0.281447	-46.8108	0.682969	-5.51437	1853.22
80	9.56873	4.07224	0.281137	2.39742e-05	0.000633912	0.281104	-58.2692	0.847788	3.07922	2746.19
84	27.7356	3.70979	0.28206	2.78947e-05	0.00183591	0.28201	-25.631	0.986428	5.13689	1446.64
86	6.25966	4.0343	0.281513	1.54867e-05	0.000377612	0.2815	-44.9658	0.547648	-3.76423	1846.93
69	8.61101	4.18903	0.28142	2.61371e-05	0.000488551	0.281402	-48.2587	0.924276	-4.97053	1945.41
9	9.71202	4.91358	0.281482	1.79993e-05	0.000635468	0.281457	-46.0643	0.6365	-0.0836027	2072.13
76	10.2091	2.63395	0.281449	3.77028e-05	0.000629106	0.281427	-47.2435	1.33327	-6.63246	1835.09
77	4.42383	4.55096	0.281422	2.04376e-05	0.000277925	0.281412	-48.1892	0.722725	-4.58171	1947.26
13	11.0791	4.40826	0.281391	2.70792e-05	0.000674935	0.281366	-49.3055	0.957588	-7.4262	1894.14
9	5.46041	3.85048	0.281377	2.10715e-05	0.00031106	0.281366	-49.7971	0.745143	-8.78403	1835.93
J1349, Neruokpuk Formation
62	12.9867	3.73982	0.281509	2.83057e-05	0.000873721	0.281475	-45.1154	1.00096	0.830511	2085.18
63	8.76255	3.84035	0.281393	2.5486e-05	0.000603065	0.281372	-49.2295	0.901251	-8.53827	1837.58
60	10.786	3.56272	0.281444	2.50407e-05	0.000706502	0.281417	-47.4167	0.885503	-3.14819	2001.23
57	14.0096	3.12743	0.281511	2.48017e-05	0.000853054	0.281479	-45.0649	0.877052	-2.50315	1933.79
50	17.9754	3.20312	0.28125	2.69333e-05	0.00110812	0.281195	-54.2783	0.95243	2.86148	2598.78
47	7.73356	3.44686	0.281068	2.35083e-05	0.000528699	0.281042	-60.7162	0.831315	-4.21925	2528.03
95	13.2332	3.87345	0.28143	2.63524e-05	0.000839227	0.281396	-47.9337	0.93189	-2.33275	2068.35
91	7.104	3.9557	0.281607	2.3572e-05	0.00048786	0.281588	-41.6486	0.833567	5.30975	2104.95
98	8.42467	4.03198	0.281467	2.12988e-05	0.000546223	0.281448	-46.5909	0.753179	-5.32947	1859.14
32	5.4297	4.1665	0.281226	1.76954e-05	0.000326749	0.281214	-55.1344	0.625756	-12.1667	1923.41
31	8.24546	4.7577	0.281398	1.91893e-05	0.000494151	0.281378	-49.0642	0.678581	-2.21056	2102.31
14	8.70453	4.48425	0.281459	2.33925e-05	0.000587063	0.281438	-46.9052	0.827217	-5.68968	1859.43
11	7.25963	4.08135	0.281167	1.83259e-05	0.000454444	0.281147	-57.2129	0.648051	-4.94976	2337.7
12	16.6416	3.39432	0.281418	2.32521e-05	0.00122631	0.281369	-48.3463	0.822255	-2.40174	2108.08
9	8.11104	2.89998	0.281483	2.33464e-05	0.00054153	0.281464	-46.0272	0.82559	-5.0522	1846.14
1	11.3081	2.57012	0.281174	2.37345e-05	0.000868696	0.281131	-56.9594	0.839312	0.407895	2590.89
21	8.11013	3.5298	0.281433	2.78149e-05	0.000522825	0.281415	-47.8058	0.983607	-6.36366	1866.03
24	10.2609	3.3604	0.281269	2.67501e-05	0.000693384	0.281236	-53.5925	0.945952	2.64985	2527.48
28	20.0978	3.27176	0.281968	2.62312e-05	0.00137704	0.281928	-28.8897	0.927604	4.05735	1526.08
66	3.98157	3.83438	0.281382	2.37657e-05	0.000249608	0.281373	-49.6126	0.840415	-6.14775	1939.68
81	6.61446	4.33521	0.281215	2.5238e-05	0.000404032	0.281201	-55.5064	0.892481	-12.5139	1928.97
80	8.34228	3.62214	0.281258	2.15551e-05	0.000546354	0.281236	-53.9915	0.762242	-5.69202	2170
85	5.11314	4.17151	0.281365	1.7095e-05	0.000285705	0.281354	-50.2252	0.604524	-7.21074	1922.19
55	10.4544	4.3756	0.281249	2.05504e-05	0.000667212	0.281222	-54.3084	0.726713	-7.63438	2106.35
94	7.3662	4.12116	0.281379	2.0813e-05	0.000472402	0.281361	-49.7306	0.735999	-4.88986	2012.91
41	6.84384	4.22841	0.281388	2.24454e-05	0.000445549	0.281372	-49.4137	0.793727	-8.57005	1835.73
15BJ10, Clarence River Group, Aichilik Formation
9	35.8326	4.3884	0.28243	2.80781e-05	0.00189858	0.282415	-12.5394	0.992912	-3.54892	427.997
6	9.98081	1.88905	0.282453	4.75966e-05	0.000516797	0.282449	-11.7477	1.68314	-2.30568	430.648
314	30.935	3.16277	0.282366	3.02073e-05	0.00132951	0.282355	-14.8327	1.06821	-5.62591	430.649
306	29.8204	3.18526	0.282367	3.21911e-05	0.00148016	0.282355	-14.7736	1.13836	-5.54172	433.832
22	16.7109	3.71363	0.282349	3.09544e-05	0.000968825	0.282341	-15.4278	1.09463	-6.08534	432.173
290	12.433	3.17912	0.282446	2.80245e-05	0.000670625	0.282438	-11.9898	0.991018	2.64542	668.801
305	26.8847	2.86308	0.282473	3.28251e-05	0.00136433	0.282448	-11.0289	1.16078	9.59867	959.605
151	35.9258	3.67118	0.282178	2.90384e-05	0.00167836	0.282148	-21.454	1.02687	-0.959426	963.82
296	34.2742	3.47909	0.282165	3.35502e-05	0.00163934	0.282134	-21.9362	1.18642	-1.04485	981.13
195	16.6419	2.7673	0.282426	3.54076e-05	0.000848729	0.282408	-12.7124	1.2521	11.4278	1103.66
204	24.2015	2.98045	0.282381	3.15267e-05	0.00113421	0.282358	-14.2713	1.11487	9.6709	1104.41
261	18.3576	2.98355	0.282118	2.61933e-05	0.000908309	0.282097	-23.5985	0.926264	3.2886	1231.04
3	14.8403	3.05898	0.281753	2.95185e-05	0.00074376	0.281735	-36.5007	1.04385	-9.08461	1250.33
258	16.1953	3.3034	0.281788	2.83095e-05	0.000834056	0.281765	-35.2397	1.0011	-2.59441	1488.6
176	24.9642	3.08398	0.281956	3.5011e-05	0.00125816	0.28192	-29.3281	1.23808	2.98984	1492.08
27	10.3618	3.15022	0.281859	3.60969e-05	0.000639594	0.281841	-32.7562	1.27648	0.375011	1501.2
15	18.985	2.21108	0.28171	3.81032e-05	0.000986249	0.281676	-38.0172	1.34743	1.46067	1802.48
89	23.6568	2.62392	0.281722	3.61107e-05	0.00120927	0.281681	-37.5734	1.27697	1.715	1806.07
269	7.88054	2.95942	0.281037	2.65776e-05	0.000412749	0.281016	-61.7989	0.93985	-0.334372	2734.31
312	11.7025	3.20011	0.281144	2.67462e-05	0.000610296	0.281112	-58.0356	0.945813	3.47669	2751.31
230	8.44418	2.94016	0.280762	2.93825e-05	0.000417413	0.28074	-71.5436	1.03904	-9.68225	2754.44
J1330, Clarence River Group, Buckland Hills Formation
62	14.3248	3.43671	0.282783	2.40406e-05	0.000988637	0.282775	-0.0793141	0.850137	8.72222	406.875
83	7.28545	4.79431	0.282322	1.72702e-05	0.000549555	0.282318	-16.3649	0.61072	-7.24053	416.838
82	27.0694	3.77029	0.282767	2.8405e-05	0.00180556	0.282753	-0.64653	1.00447	8.19971	419.413
79	10.5365	4.2402	0.28281	2.08701e-05	0.000888237	0.282803	0.881658	0.738021	10.3	433.874
37	9.85295	4.50037	0.282377	2.23888e-05	0.000638972	0.282372	-14.4363	0.791725	-4.85907	438.52
69	20.7128	4.7628	0.282406	2.4703e-05	0.00123841	0.282396	-13.3969	0.87356	-3.69447	452.369
15	20.9781	2.95776	0.282566	3.14011e-05	0.00123992	0.282554	-7.75071	1.11042	2.87152	494.745
11	11.3581	5.18337	0.282373	2.19419e-05	0.000636819	0.282367	-14.5756	0.775921	-3.4773	507.731
21	46.3972	4.03923	0.281261	3.53198e-05	0.00255716	0.281215	-53.8994	1.249	-34.3771	947.664
49	11.2209	4.35146	0.281509	1.97324e-05	0.000670481	0.281496	-45.1402	0.697787	-24.2657	953.996
22	27.0779	5.69543	0.282197	2.12916e-05	0.00161306	0.282168	-20.7844	0.752926	-0.456166	954.084
29	26.9263	5.51036	0.28222	1.6698e-05	0.00164821	0.282191	-19.9659	0.590485	0.344719	954.222
72	18.2444	4.68848	0.282276	1.79651e-05	0.00117614	0.282255	-17.9871	0.635292	2.88858	966.128
67	37.7081	6.00759	0.282202	2.34323e-05	0.00234422	0.282158	-20.6336	0.828627	-0.31428	975.761
55	18.4412	4.74678	0.282375	2.48151e-05	0.00116555	0.282351	-14.5002	0.877526	8.86945	1079.38
99	9.26262	4.33806	0.282127	1.75768e-05	0.000561242	0.282114	-23.2713	0.621561	3.80821	1226.81
23	8.71719	4.82813	0.282169	2.60271e-05	0.000634949	0.282152	-21.787	0.920385	9.03356	1396.45
65	21.6229	4.44857	0.281938	2.68851e-05	0.00144605	0.281895	-29.9509	0.950726	3.59144	1556.62
10	21.994	4.19955	0.281832	2.68478e-05	0.00129634	0.281791	-33.7072	0.949406	2.07137	1651.49
43	6.41977	4.12334	0.281379	2.12991e-05	0.000420176	0.281364	-49.7155	0.753192	-8.72467	1840.87
59	13.2361	4.28352	0.281209	2.42834e-05	0.00079723	0.281181	-55.7353	0.858722	-15.1535	1844.62
20	7.75886	4.86835	0.281414	2.11506e-05	0.000515955	0.281396	-48.4922	0.747941	-7.43494	1848.82
63	37.473	2.89206	0.281569	3.6984e-05	0.00231182	0.281487	-42.9878	1.30785	-3.70242	1869.54
8	14.6007	3.644	0.281266	2.71494e-05	0.000954185	0.281232	-53.703	0.960073	-12.6337	1874.75
93	4.81456	4.18578	0.281319	2.29542e-05	0.000295958	0.281308	-51.8584	0.811718	-9.16756	1908.93
13	6.67159	4.74219	0.28151	1.97738e-05	0.000421145	0.281494	-45.0958	0.699252	-2.45223	1912.65
14	9.65656	3.91495	0.281389	2.26533e-05	0.000606916	0.281367	-49.3539	0.801078	-6.72694	1923.31
100	6.20789	4.7908	0.281383	2.37014e-05	0.000337034	0.281371	-49.5662	0.838141	-6.57	1924.18
27	7.19174	4.11794	0.281032	1.77685e-05	0.000466679	0.281011	-61.9852	0.628339	-9.89119	2332.28
58	9.88561	4.08658	0.281287	1.97205e-05	0.000691125	0.281253	-52.9693	0.697368	4.5662	2583.55
57	9.72634	3.96879	0.28107	2.4649e-05	0.000634977	0.281039	-60.6303	0.871653	-2.36212	2613.11
74	11.9786	4.23166	0.281046	2.08498e-05	0.000758238	0.281007	-61.4798	0.737303	-1.53739	2695.96
J1341, Clarence River Group, Buckland Hills Formation
2	21.2705	3.63502	0.282698	2.58782e-05	0.00144837	0.282687	-3.09173	0.915121	5.59905	407.625
29	5.11177	3.91832	0.28279	2.43435e-05	0.00040499	0.282787	0.174763	0.860849	9.55015	425.679
36	6.59992	3.76562	0.282769	2.16622e-05	0.000481205	0.282766	-0.550097	0.766032	8.94887	432.281
21	12.5209	4.11432	0.282791	2.29457e-05	0.000861174	0.282784	0.225557	0.81142	10.0823	453.619
37	5.07904	3.21109	0.282727	2.0751e-05	0.000327945	0.282724	-2.05134	0.733807	7.214	419.831
67	21.4279	4.1778	0.282787	1.79051e-05	0.00139281	0.282775	0.0541313	0.633172	9.73788	453.027
81	7.68328	3.90229	0.282811	2.3097e-05	0.0005196	0.282806	0.906185	0.81677	10.4091	432.893
78	11.3321	3.79908	0.282757	3.05946e-05	0.00078527	0.282751	-0.974607	1.0819	8.80181	448.963
73	10.4551	3.40376	0.282752	2.9342e-05	0.00071473	0.282746	-1.15415	1.03761	8.60394	447.177
92	19.0908	3.63148	0.282854	2.04154e-05	0.00153316	0.282841	2.42498	0.72194	11.9525	447.584
95	25.8997	3.84172	0.282813	2.78318e-05	0.00174509	0.282799	0.97355	0.984204	9.96313	425.298
87	20.452	4.2011	0.282703	1.98206e-05	0.00136889	0.282693	-2.8885	0.700905	6.08087	419.586
26	4.78534	2.04137	0.282687	3.75135e-05	0.000316816	0.282685	-3.46496	1.32657	5.70309	415.364
8	7.9422	4.09012	0.282825	2.61221e-05	0.000637455	0.28282	1.40297	0.923743	10.6305	421.887
91	6.053	4.16189	0.282799	2.20113e-05	0.000401141	0.282796	0.494107	0.778375	9.97074	430.189
45	10.0101	5.40705	0.2828	1.98721e-05	0.000691869	0.282794	0.525695	0.702728	10.0131	434.461
66	13.0042	3.67998	0.282811	2.73748e-05	0.000907978	0.282803	0.912113	0.968043	10.5142	442.557
J1118, Clarence River Group, Buckland Hills Formation
1	13.9019	3.45029	0.282064	3.38323e-05	0.000930724	0.282038	-25.5086	1.1964	5.96903	1439
97	11.9799	2.83618	0.281863	4.20175e-05	0.000914947	0.281837	-32.6023	1.48585	-0.264846	1478
3	2.34457	2.76428	0.281403	3.8809e-05	0.000157783	0.281397	-48.8747	1.37239	-5.73857	1920
6	22.1685	2.11414	0.282345	3.72426e-05	0.00179816	0.282328	-15.5505	1.31699	-4.96644	502
11	13.1122	2.29882	0.281263	3.44312e-05	0.000731045	0.281231	-53.8184	1.21758	-2.08287	2333
12	5.37136	2.88223	0.28144	3.94371e-05	0.000295992	0.281429	-47.5466	1.3946	-1.12307	2071
16	13.4073	1.80985	0.281346	5.15909e-05	0.000949916	0.281309	-50.895	1.82439	-6.75208	2011
21	22.2193	3.29248	0.282241	3.38091e-05	0.00133536	0.282212	-19.2535	1.19558	4.80239	1117
22	25.7404	2.81709	0.282355	4.01987e-05	0.00174236	0.282342	-15.1915	1.42153	-6.37125	418
24	15.9117	1.99815	0.282223	4.58019e-05	0.00112872	0.282213	-19.879	1.61967	-10.0933	455
30	7.32567	2.81418	0.281436	4.09378e-05	0.000438926	0.281419	-47.6915	1.44767	-1.24015	2081
38	14.1994	2.65929	0.281885	3.57164e-05	0.000808911	0.281862	-31.8354	1.26302	0.27496	1463
37	5.3109	3.20857	0.281297	4.28982e-05	0.000334116	0.281291	-52.6093	1.51699	-29.1886	1059
45	20.8558	3.29888	0.28159	3.49221e-05	0.00119301	0.281548	-42.2565	1.23493	-2.16908	1842
41	22.0746	3.28454	0.282381	3.74655e-05	0.00124473	0.282359	-14.2946	1.32488	5.60452	923
47	0.99665	3.09263	0.282219	5.05296e-05	7.19509e-05	0.282218	-20.0105	1.78686	-9.03476	494
49	5.20266	2.0482	0.281444	3.97096e-05	0.00034911	0.28143	-47.4236	1.40423	-1.50934	2052
50	16.4253	2.59751	0.282417	4.61148e-05	0.0010392	0.282407	-13.0197	1.63074	-2.48376	488
53	22.8475	2.51123	0.282364	3.95468e-05	0.00128244	0.282353	-14.8883	1.39848	-5.46685	440
54	34.268	2.641	0.281772	4.79153e-05	0.0019634	0.281711	-35.808	1.69441	-0.789393	1651
59	5.62065	2.54827	0.28115	5.32205e-05	0.000342949	0.281133	-57.8089	1.88201	2.96651	2698
56	15.3232	2.40486	0.282043	3.0168e-05	0.000947151	0.282023	-26.227	1.06682	-1.92064	1116
61	6.7437	1.92792	0.281265	4.02382e-05	0.000391877	0.281247	-53.7676	1.42293	-0.781164	2364
64	15.7328	2.71808	0.281251	3.97911e-05	0.000896939	0.28121	-54.2608	1.40711	-2.47279	2347
65	3.04987	2.39205	0.281371	3.21295e-05	0.00016703	0.281365	-50.0134	1.13618	-6.82532	1923
62	11.0647	2.17321	0.282206	3.45324e-05	0.000661622	0.282191	-20.4605	1.22115	6.236	1213
66	3.90402	2.42162	0.281631	2.83717e-05	0.000244857	0.281622	-40.8189	1.0033	2.35409	1925
67	15.146	1.54666	0.281394	2.59279e-05	0.00118135	0.28135	-49.2034	0.916877	-7.19516	1929
69	17.4466	3.5333	0.281783	2.19748e-05	0.00110959	0.281749	-35.4158	0.777084	0.775041	1661
76	6.12906	2.41804	0.282257	2.58484e-05	0.000603896	0.282245	-18.6832	0.914067	4.49359	1053
78	19.5685	2.35537	0.281257	3.5151e-05	0.00110181	0.281207	-54.0192	1.24303	-1.92507	2375
80	8.61572	2.79022	0.28213	3.90313e-05	0.000515866	0.282115	-23.1777	1.38025	9.20404	1461
83	31.8535	2.31569	0.282382	5.14721e-05	0.00193127	0.282366	-14.2588	1.82018	-5.08947	437
90	25.8826	2.65558	0.282347	3.35777e-05	0.00162489	0.282334	-15.4841	1.18739	-6.43996	427
96	17.0925	2.17505	0.282811	3.35458e-05	0.00129051	0.282801	0.936243	1.18627	10.22	433
1	19.778	2.52302	0.282253	3.45894e-05	0.00126345	0.282243	-18.8226	1.22317	-9.60168	430.606
2	13.5386	4.5104	0.281164	2.55012e-05	0.00088737	0.281118	-57.3335	0.901788	2.11535	2683.62
3	10.4498	4.77664	0.282116	2.47868e-05	0.000663793	0.282104	-23.6619	0.876524	-2.48116	965.539
22	8.35413	3.27146	0.281334	2.83981e-05	0.000519372	0.281315	-51.3257	1.00423	-10.2394	1850.81
24	5.35581	3.35419	0.28133	3.24193e-05	0.000315714	0.281318	-51.4656	1.14643	-8.18099	1935.94
20	17.1244	3.89081	0.282254	2.66038e-05	0.000989986	0.282245	-18.7756	0.940779	-8.66502	467.979
16	9.58876	3.43629	0.281162	2.80248e-05	0.000526577	0.281144	-57.3764	0.991028	-16.7265	1833.07
17	25.2153	3.92738	0.282247	2.63981e-05	0.00146972	0.282221	-19.0107	0.933503	1.39074	953.071
10	16.7593	3.78415	0.282303	2.91766e-05	0.000947319	0.282296	-17.0312	1.03176	-7.6772	432.495
11	11.3647	3.10216	0.281214	3.257e-05	0.000658552	0.28118	-55.5682	1.15176	3.92959	2667.1
12	8.64517	3.64184	0.281195	3.33436e-05	0.000481787	0.281178	-56.2259	1.17912	-15.6448	1827.38
7	21.0584	3.41986	0.282775	2.88258e-05	0.00138256	0.282763	-0.36579	1.01935	9.33981	453.92
6	14.9535	3.0777	0.282251	2.99837e-05	0.000976932	0.282234	-18.8783	1.0603	1.85967	954.105
8	12.3966	3.24646	0.281402	2.75631e-05	0.000764861	0.281371	-48.9197	0.974703	-2.64021	2093.93
5	6.1652	3.29962	0.282276	2.96681e-05	0.000327671	0.282274	-17.9867	1.04914	-8.35417	437.082
25	14.265	4.59872	0.282347	2.8956e-05	0.000883817	0.28234	-15.4769	1.02396	-5.97435	438.406
J1319, Clarence River Group, Buckland Hills Formation
1	8.67204	4.50008	0.28285	2.67661e-05	0.000635999	0.282844	2.28782	0.946518	12.2426	454.901
55	14.7685	4.52502	0.282809	3.47244e-05	0.000973409	0.282801	0.855621	1.22794	10.4326	442.29
3	74.3787	3.23171	0.281186	4.60527e-05	0.00312808	0.281035	-56.5465	1.62854	-4.55097	2525.33
52	13.342	3.48434	0.281253	2.68764e-05	0.000842373	0.281209	-54.1914	0.950419	5.4662	2688.3
50	21.4368	3.15965	0.281864	2.56642e-05	0.00141706	0.28182	-32.5703	0.90755	2.71398	1634.93
9	10.734	4.34492	0.281451	2.39767e-05	0.000665155	0.281426	-47.1575	0.847878	-3.08087	1990.25
8	16.7524	4.17532	0.282926	2.63421e-05	0.00136733	0.282915	4.96916	0.931525	14.123	427.804
49	3.20174	4.25173	0.281197	2.17374e-05	0.000253692	0.281184	-56.1399	0.768691	4.7586	2695.8
65	41.5012	4.54955	0.282203	2.42728e-05	0.00252556	0.282157	-20.5641	0.858349	-0.428968	972.602
48	22.697	3.54059	0.282143	3.14858e-05	0.0014858	0.282106	-22.6949	1.11342	5.97269	1334.48
15	0.834126	5.00777	0.28139	1.78945e-05	3.87477e-05	0.281389	-49.3168	0.632795	-7.21911	1868.31
98	13.4995	5.09471	0.282406	2.14815e-05	0.000865919	0.282392	-13.4164	0.759641	5.33276	860.133
39	25.7001	5.73796	0.282145	2.00845e-05	0.00154546	0.282117	-22.6172	0.710238	-1.9115	969.754
93	18.905	4.81277	0.282895	1.87036e-05	0.00142234	0.282882	3.87669	0.661408	13.5986	455.036
41	19.021	4.61353	0.281626	2.12183e-05	0.00125591	0.28159	-40.9802	0.750335	-7.99514	1524.06
68	15.7571	3.97009	0.281931	2.46983e-05	0.00109645	0.2819	-30.191	0.873395	2.62882	1507.56
70	39.2579	5.04984	0.282139	2.87171e-05	0.00241736	0.282095	-22.853	1.01551	-2.79366	965.885
72	12.6217	4.31429	0.281963	1.96895e-05	0.000818649	0.28194	-29.0561	0.696273	4.56001	1530.42
74	31.9602	2.32719	0.282215	2.11968e-05	0.00230573	0.282189	-20.1455	0.749574	-7.43241	612.294
75	7.59737	4.33942	0.282757	2.11866e-05	0.000536181	0.282753	-0.985827	0.749213	8.12611	415.457
76	27.6612	4.29277	0.282118	2.48887e-05	0.00147025	0.282091	-23.573	0.880128	-2.53558	982.927
36	18.1188	2.88758	0.281265	2.67629e-05	0.00122979	0.281206	-53.7566	0.946404	1.23102	2512.75
100	2.62267	4.42596	0.281452	1.99892e-05	0.00021949	0.281444	-47.1395	0.70687	-5.00712	1879.37
20	15.5127	3.54895	0.282797	2.39958e-05	0.00113911	0.282788	0.413259	0.848554	9.48439	421.19
25	18.1481	3.63966	0.282775	2.78089e-05	0.00127112	0.282765	-0.357802	0.983393	8.75322	424.786
29	7.03909	5.07649	0.281454	2.00984e-05	0.000434553	0.281438	-47.0844	0.710729	-4.20967	1923.93
32	10.3258	4.58188	0.281695	2.05681e-05	0.000683602	0.281671	-38.5291	0.727339	3.88697	1916.31
8	61.0763	3.43996	0.282789	2.70949e-05	0.00417576	0.282752	0.131053	0.958146	9.25113	466.931
86	20.4188	4.36265	0.282244	2.10174e-05	0.00138042	0.282232	-19.1345	0.743229	-9.15773	467.412
15BJ11, Clarence River Group, Buckland Hills Formation
16	29.3259	1.50876	0.28278	4.86948e-05	0.00167327	0.282766	-0.191471	1.72197	8.97873	432.883
66	31.8429	2.05493	0.282788	3.70868e-05	0.00211811	0.282771	0.09685	1.31148	9.16585	434.135
17	54.7948	2.17412	0.282844	4.00225e-05	0.00246617	0.282824	2.09102	1.4153	11.1004	436
292	13.9573	2.82831	0.282707	3.43709e-05	0.000764387	0.282699	-2.76103	1.21544	9.37105	556.198
278	10.0324	3.2081	0.282302	2.86335e-05	0.000495069	0.282291	-17.0968	1.01256	7.0419	1092.41
196	13.9773	2.92735	0.282167	3.75054e-05	0.000889449	0.282149	-21.8441	1.32629	2.32161	1107.19
57	22.4498	2.70581	0.282116	3.71537e-05	0.00137962	0.282082	-23.6497	1.31385	4.21367	1293.51
214	13.3479	3.48134	0.28117	3.04035e-05	0.000683187	0.281147	-57.1085	1.07515	-18.0945	1768.99
252	39.0632	2.87224	0.282709	2.68692e-05	0.00234461	0.282688	-2.69282	0.950163	7.19091	476.474
65	26.979	3.23467	0.282815	3.19387e-05	0.00152198	0.282802	1.05164	1.12943	10.2947	434.202
61	10.8261	3.11441	0.282782	2.43271e-05	0.000743423	0.282776	-0.108089	0.860268	9.27364	430.344
125	12.1502	2.56265	0.282846	2.60197e-05	0.000797292	0.282839	2.14484	0.920123	11.4376	426.879
144	35.6524	3.58585	0.282848	2.83958e-05	0.00212463	0.282829	2.21085	1.00415	11.9249	464.839
14BJ26, Clarence River Group, Buckland Hills Formation
48	22.8826	5.84732	0.282884	1.90926e-05	0.00165618	0.282871	3.50604	0.675163	12.799	438.243
37	9.71591	4.91317	0.282897	2.06096e-05	0.000805731	0.28289	3.95395	0.728809	13.8472	454.353
14	37.2037	7.22331	0.282871	1.98588e-05	0.0028536	0.282846	3.04177	0.702259	12.5864	467.501
24	59.4219	6.77467	0.282887	2.03808e-05	0.00447473	0.282848	3.61325	0.720716	12.7467	472.199
50	44.2918	3.91253	0.282769	2.39254e-05	0.00269422	0.282744	-0.555409	0.846063	9.72437	500.916
21	37.9841	3.11173	0.282681	2.95864e-05	0.00208111	0.28266	-3.66396	1.04625	8.0454	559.284
28	8.67079	5.27464	0.282515	1.94964e-05	0.000600286	0.282507	-9.55588	0.689444	4.7996	654.562
1	7.37649	6.12312	0.282204	2.53644e-05	0.000555566	0.282193	-20.542	0.896951	2.30519	1036.9
40	11.0924	4.36924	0.282144	2.35613e-05	0.000687541	0.282129	-22.6763	0.833189	3.03314	1169.92
6	10.6089	5.08635	0.281845	2.25131e-05	0.000826909	0.28182	-33.2547	0.796119	0.608869	1542.52
38	4.49382	4.23316	0.281749	2.89957e-05	0.00030245	0.281739	-36.6339	1.02536	2.82524	1765.02
14BJ29, Clarence River Group, Buckland Hills Formation
73	14.3759	3.84996	0.282745	2.63593e-05	0.000913506	0.282738	-1.4178	0.932131	7.41775	407.562
108	15.1454	4.43593	0.282725	2.19597e-05	0.00108273	0.282716	-2.12196	0.776551	6.915	418.997
6	16.686	3.29058	0.282706	3.27316e-05	0.00120709	0.282697	-2.78529	1.15747	6.3651	425.88
81	9.35843	4.94872	0.282696	2.4308e-05	0.000619093	0.282691	-3.14485	0.859591	6.19739	427.065
77	10.6269	4.67921	0.282818	2.21807e-05	0.000868861	0.282811	1.1726	0.784367	10.7826	442.384
107	36.9636	4.77863	0.282855	2.10591e-05	0.00247896	0.282834	2.47442	0.744704	11.959	459.044
14	37.7777	4.77128	0.282839	2.56035e-05	0.00292906	0.282813	1.90627	0.905407	11.6006	476.014
32	28.2327	4.81101	0.282863	2.86648e-05	0.00224301	0.282843	2.7723	1.01366	12.9719	489.744
52	9.03407	3.99176	0.282657	2.44164e-05	0.000652434	0.28265	-4.54202	0.863426	7.27472	540.099
22	14.2761	5.39341	0.282491	2.25306e-05	0.00103366	0.282479	-10.3912	0.79674	2.99772	618.933
34	6.84338	5.19274	0.282258	2.80351e-05	0.00042485	0.282251	-18.6339	0.991391	1.36657	905.322
44	8.70679	5.27268	0.28115	2.6237e-05	0.000558455	0.281124	-57.8164	0.927808	-3.98417	2413.51
89	16.4603	4.2608	0.281586	2.34789e-05	0.000974839	0.281555	-42.4112	0.830275	-5.55879	1685.09
40	6.52972	6.03426	0.282267	2.03693e-05	0.000419832	0.282257	-18.3341	0.72031	8.27868	1200.29
33	17.5221	4.57675	0.282274	2.55208e-05	0.00100959	0.282252	-18.0837	0.902482	6.8632	1146.24
35	35.9833	4.76296	0.282137	2.96087e-05	0.00205123	0.282099	-22.9227	1.04704	-2.20897	985.571
88	19.8099	4.75644	0.282924	2.22949e-05	0.00146723	0.282912	4.92502	0.788406	14.5398	450.623
92	20.3717	3.87275	0.282802	2.57205e-05	0.00133672	0.282791	0.616825	0.909541	10.5641	464.455
5	21.6628	5.57218	0.282183	2.77265e-05	0.00141373	0.282166	-21.2923	0.980481	-7.71827	635.508
18	35.4159	4.64759	0.282796	2.57997e-05	0.00217682	0.28277	0.382219	0.912344	13.534	629.312
105	16.6621	5.116	0.282841	1.97713e-05	0.00130059	0.282831	1.99496	0.699162	11.422	439.735
14BJ25, Romanzof Formation
94	35.3805	4.97362	0.282775	2.62738e-05	0.00281971	0.282752	-0.339693	0.929109	8.56924	436.204
77	91.1938	5.00507	0.282863	2.74455e-05	0.00604297	0.282812	2.76684	0.970542	11.0066	450.387
107	36.7138	4.88483	0.282804	2.57613e-05	0.00263047	0.282782	0.674613	0.910985	10.0143	454.354
62	94.5038	5.25989	0.282872	2.79812e-05	0.00667692	0.282814	3.08491	0.989487	11.3809	464.041
64	64.6881	4.47202	0.282788	2.82773e-05	0.00415501	0.282751	0.122116	0.999958	9.44427	476.886
70	10.898	4.83856	0.282838	2.08225e-05	0.000879504	0.28283	1.86711	0.736336	11.7691	455.868
67	38.2563	3.7663	0.282885	3.60956e-05	0.00324517	0.282858	3.54321	1.27643	12.6765	453.173
97	15.6352	4.90759	0.282827	2.10531e-05	0.00117548	0.282816	1.46755	0.744492	11.4909	465.637
Notes for tables:
1	Data reduction methodology is from Woodhead et al. (2004)
2	Analytical methods described in detail by Gehrels and Pecha (2014)
3	(176Yb + 176Lu) / 176Hf (%) expresses the proportion of 176 due to 176Yb + 176Lu versus the proportion due to 176Hf, in %.
4	Volts Hf is the sum of voltages of all Hf isotopes.
5	176Hf/177Hf is the measured 176Hf/177Hf, corrected for fractionation and interfences. Shown with uncertainty expressed at 1-sigma.
6	176Lu/177Hf is the intensity of 176Lu, calculated from the measured instensity of 175Lu and 176Lu/175Lu=0.02653 (from Patchett, 1983), compared to the measured intensity of 177Hf.
		Fractionation of Lu isotopes is assumed to be the same as fractionation of Yb isotopes.
7	176Hf/177Hf (T) is the 176Hf/177Hf corrected to the time of crystallization using a decay constant of 1.867e-11 (from Scherer et al., 2001 and Soderland et al., 2004)
8	E-Hf (0) is the present-day epsilon Hf value using 176Hf/177Hf=0.282785 and 176Lu/177Hf=0.0336 (from Bouvier et al., 2008). The uncertainty is expressed at 1-sigma.
9	E-Hf (T) is the epsilon Hf value at the time of crystallization. The uncertainty is expressed at 1-sigma.
10	U-Pb ages are based on 206/238 for ages younger than ~1.0 Ga, and on 206/207 for ages older than ~1.0 Ga. This age cutoff may be slightly different for each sample.
11	Isotope ratios as follows:
		180/177	1.88666	Patchett (1983)
		179/177	0.7325	Patchett & Tatsumoto (1980)
		178/177	1.46718	Patchett (1983)
		176/177	0.28216	Patchett (1983)
		174/177	0.00871	Patchett (1983)
		176/175	0.02653	Patchett (1983)
		176/171	0.901691	Vervoort et al. (2004)
		173/171	1.13236	Vervoort et al. (2004)
		172/171	1.53174	Vervoort et al. (2004)
Notes for plots:
1	DM array is from Vervoort and Blichert-Toft (1999), using 176Hf/177Hf=0.283225 and 176Lu/177Hf=0.0383
2	CHUR is from Bouvier et al. (2008), using 176Hf/177Hf=0.282785 and 176Lu/177Hf=0.0336.
3	Hf isotope evolution lines assume an average value of 176Lu/177Hf=0.0115 and a range of 176Lu/177Hf=0.0036 to 176Lu/177Hf=0.0193.
		Values are from the average and 2-sigma range of values reported by Vervoort and Patchett (1996) and Vervoort et al. (1999).
4	Uncertainties shown at 2-sigma.
References cited:
	Bouvier, A., Vervoort, J., and Patchett, J., 2008, The Lu-Hf and Sm-Nd isotopic composiiton of CHUR: Consraints from unequilibrated chondrites and implications for the bulk composition of terrestrial planets: Earth and Planetary Science Letters: v. 273, p. 48-57.
	Gehrels, G. and Pecha, M., 2014, Detrital zircon U-Pb geochronology and Hf isotope geochemistry of Paleozoic and Triassic passive margin strata of western North America: Geosphere, v. 10 (1), p. 49-65.
	Patchett, P.J., 1983, Importance of the Lu-Hf isotopic system in studies of planetary chronology and chemical evolution: Geochimica et Cosmochimica Acta, v. 47, p. 81-91.
	Scherer, E., Munker, C., and Mezger, K., 2001, Calibrating the Lu-Hf clock: Science, v. 293, p. 683–686,
	Söderlund, U., Patchett, P.J., Vervoort, J.D. and Isachsen, C.E., 2004, The 176Lu decay constant determined by Lu-Hf and U-Pb isotope systematics of Precambrian mafic intrusions: Earth and Planetary Science Letters, v. 219, p. 311-324.
	Vervoort, J. D., and Blichert-Toft, J., 1999, Evolution of the depleted mantle: Hf isotope evidence from juvenile rocks through time: Geochimica et Cosmochimica Acta, v. 63, p. 533–556.
	Vervoort, J.D., Patchett, P.J., Soderlund, U., and Baker, M., 2004, Isotopic composition of Yb and the determination of Lu concentrations and Lu/Hf ratios by isotope dilution using MC-ICPMS: Geochemistry Geophysics Geosystems, v. 5, Q11002. (doi:10.1029/2004GC000721)
	Vervoort, J.D., and Patchett, P.J., 1996, Behavior of hafnium and neodymium isotopes in the crust: constraints from Precambrian crustally derived granites: Geochimica et Cosmochimica Acta, v. 60, p. 3717-3723
	Vervoort, J.D., Patchett, P.J., Blichert-Toft, J., and Albarede, F., 1999, Relationships between Lu-Hf and Sm-Nd isotopic systems in the global sedimentary system: Earth and Planetary Science Letters, v. 168, p. 79-99.
	Woodhead, J.D., and Hergt, J.M., 2004, A preliminary appraisal of seven natural zircon reference materials for in situ Hf isotope determination: Geostandards and Geoanalytical Research, v. 29 (2), p. 183-195.

## Sheet: Table DR7
Table DR7. 40Ar/39Ar isotope composition of muscovite analyzed at the University of Alaska Fairbanks
Weighted average of J from standards = 4.478e-03 +/- 1.057e-05
	40Ar/39Ar	+/-	37Ar/39Ar	+/-	36Ar/39Ar	+/-	% Atm.	+/-	Ca/K	+/-	Cl/K	+/-	40*/39K	+/-	Age	+/-		Age	+/-
Grain #	meas.		meas.		meas.		40Ar								(Ma)	(Ma)		(Ma)	(Ma)
Sample 15BJ11, Aichilik formation, Clarence River Group																	Step-heat
1	64.7538	0.31487	-0.01471	0.00658	0.00099	0.0011	0.45192	0.49996	-0.02699	0.01206	0.00029	0.00021	64.4309	0.45055	456.8	2.82		414.6	1.73
2	64.4151	0.20615	-0.01886	0.01199	0.00439	0.00122	2.01719	0.56122	-0.03461	0.022	0.00016	0.00025	63.0857	0.4142	448.36	2.61		420.7	3.48
3	63.3911	0.36417	-0.05019	0.01432	0.00762	0.00265	3.55872	1.23689	-0.09208	0.02627	-4e-05	0.00047	61.1044	0.85939	435.85	5.44		423.44	2.22
4	60.5013	0.33419	0.00357	0.01091	0.00592	0.00148	2.89031	0.72289	0.00654	0.02002	0.00016	0.00022	58.7239	0.54472	420.7	3.48		424.54	5.47
5	60.5184	0.29125	0.01128	0.01598	0.00394	0.00274	1.92543	1.33712	0.0207	0.02932	0.00055	0.00049	59.3245	0.85803	424.54	5.47		435.44	1.21
6	59.587	0.22302	-0.00457	0.00589	0.00137	0.00091	0.67847	0.45049	-0.00838	0.0108	0.00043	0.00014	59.153	0.34803	423.44	2.22		435.85	5.44
7	61.4858	0.14297	0.00257	0.00278	0.00141	0.00043	0.67594	0.20701	0.00472	0.00511	0.00016	6e-05	61.0408	0.19073	435.44	1.21		448.36	2.61
8	83.9594	0.43458	-0.00983	0.01366	-0.00835	0.00208	-2.94007	0.73209	-0.01804	0.02507	0.00031	0.00023	86.3967	0.75956	589.37	4.42		456.8	2.82
9	57.6506	0.18469	-0.00572	0.00376	-0.00051	0.00066	-0.25945	0.33968	-0.01049	0.00689	0.00035	0.00012	57.7702	0.26935	414.6	1.73		456.8	3.3
													Step-heat Integrated		456.8	3.3		589.37	4.42
Sample 15BJ10, Buckland Hills formation, Clarence River Group																	Step-heat
1	63.1632	0.26371	0.00548	0.00938	0.00805	0.00161	3.76754	0.75228	0.01005	0.01722	0.00069	0.00022	60.7551	0.53867	433.63	3.42		433.63	3.42
2	63.1567	0.27185	-0.00868	0.01473	0.00439	0.00154	2.05655	0.72038	-0.01593	0.02703	0.00017	0.00021	61.8284	0.52744	440.43	3.33		434.48	4.36
3	62.3718	0.2189	-0.00517	0.00692	0.00205	0.0009	0.97296	0.42482	-0.00948	0.0127	0.00036	0.00015	61.7353	0.34237	439.84	2.16		436.96	6.14
4	61.8842	0.37087	-0.00511	0.02512	0.00194	0.00304	0.92829	1.45003	-0.00937	0.04608	-0.0001	0.00048	61.2801	0.96929	436.96	6.14		437.7	3
5	64.9069	0.25897	-0.04557	0.01562	0.01348	0.00217	6.14389	0.98967	-0.08361	0.02866	0.00029	0.00032	60.8892	0.68744	434.48	4.36		439.17	1.86
6	62.7944	0.21211	-0.0053	0.00231	0.00384	0.0007	1.80973	0.32842	-0.00973	0.00425	0.0005	8e-05	61.6287	0.29352	439.17	1.86		439.84	2.16
													Step-heat Integrated		437.7	3		440.43	3.33
